# Supplementary material for: Synthesis of di/tri-substituted carbazoles involving Pd-mediated Sonogashira coupling of indolyltriflates with aryl acetylenes
Source: Royal Society of Chemistry journal article supplement (doi:10.1039/d4ob01536c), 2024-01-01
Supplement: d4ob01536c1.pdf [file d4ob01536c1.pdf]

## Supporting Information

### Synthesis of di/tri-substituted carbazoles involving Pd-Mediated Sonogashira coupling of indolyltriflates with aryl acetylenes

Rudrasenan Agneswaran<sup>a</sup> and Arasambattu K. Mohanakrishnan<sup>a,\*</sup>

<sup>a</sup>Department of Organic Chemistry, University of Madras, Guindy Campus, Chennai-600  
025, Tamil Nadu, India,

**E-mail: [mohanakrishnan@unom.ac.in](mailto:mohanakrishnan@unom.ac.in); [mohan\\_67@hotmail.com](mailto:mohan_67@hotmail.com)**

#### Table of contents:

|                                                                          |   |
|--------------------------------------------------------------------------|---|
| 1. Experimental Procedures for Starting materials & other reactions..... | 2 |
| 2. References.....                                                       | 8 |
| 3. Copies of NMR & HRMS Spectra.....                                     | 9 |

## Experimental Procedure

### Attempted synthesis of ethyl (*E*)-3-(2-(3-phenylprop-2-yn-1-yl)-1-(phenylsulfonyl)-1*H*-indol-3-yl)acrylate **3** from 2-bromomethyl-3-vinylindole **1**

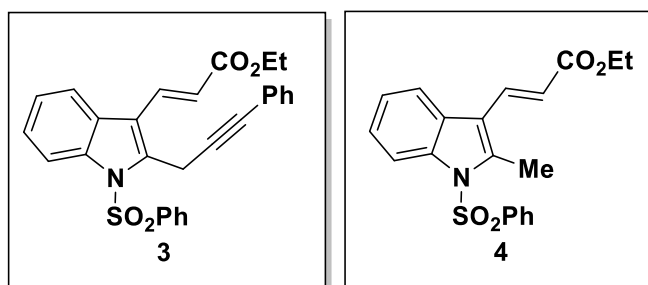

#### Using Pd(PPh<sub>3</sub>)<sub>4</sub> condition

To a solution of 2-bromomethylindole<sup>1</sup> **1** (0.25 g, 0.45 mmol) in dry THF (10 mL), phenylacetylene (91 mg, 0.89 mmol), Pd(PPh<sub>3</sub>)<sub>4</sub> (52 mg, 0.04 mmol), and K<sub>2</sub>CO<sub>3</sub> (62 mg, 0.45 mmol) were added and refluxed for 8 h. Then, the reaction mixture was dissolved in EA (20 mL). It was then diluted with water (30 mL), and the combined organic layer was separated. The aqueous layer was extracted with EA (2 x 10 mL), and the combined organic extract was dried (Na<sub>2</sub>SO<sub>4</sub>). The solvent was removed under *vacuo* and triturated with MeOH (5 mL), to give the de-brominated indole **4** (165 mg, 80%).

#### Using LHMDS & CuI condition

To a solution of 2-bromomethylindole<sup>1</sup> **1** (0.2 g, 0.56 mmol) in dry toluene (5 mL), phenylacetylene (0.17 g, 1.67 mmol) copper iodide (11 mg, 0.05 mmol) and LHMDS (0.11 g, 0.67 mmol) were added, the reaction mixture was stirred at 90 °C for 8 h. The reaction mixture was then filtered by celite pad and washed with EA (20 mL). The filtrate was quenched with crushed ice (100 g) containing NH<sub>4</sub>Cl (2 g), and the combined organic layer was separated. The aqueous layer was extracted with EA (2 x 10 mL), and the combined organic extract was dried (Na<sub>2</sub>SO<sub>4</sub>). The solvent was removed under *vacuo* and triturated with MeOH (5 mL), to give the de-brominated indole **4** (157 mg, 95%).

#### Ethyl (*E*)-3-(2-methyl-1-(phenylsulfonyl)-1*H*-indol-3-yl)acrylate **4**<sup>1</sup>

<sup>1</sup>H NMR (300 MHz, CDCl<sub>3</sub>): δ 8.29 (d, *J* = 8.7 Hz, 1 H), 7.80-7.87 (m, 4 H), 7.31- 7.60 (m, 5 H), 6.53 (d, *J* = 16.2 Hz, 1 H), 4.29 (q, *J* = 7.2 Hz, 2 H), 2.74 (s, 3 H), 1.36 (t, *J* = 7.2 Hz, 3 H) ppm; <sup>13</sup>C NMR (75 MHz, CDCl<sub>3</sub>): δ 167.3, 138.9, 136.7, 135.4, 134.1, 129.5, 127.5, 126.4, 124.9, 119.9, 118.7, 116.1, 114.7, 60.5, 14.4, 13.2 ppm.

### Ethyl (*E*)-3-(2-((dimethylamino)methyl)-1-(phenylsulfonyl)-1*H*-indol-3-yl)acrylate **5**

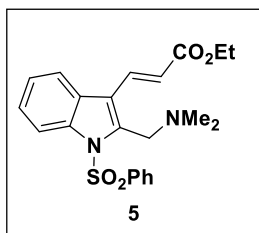

To a solution of 2-bromomethyl-3-vinylindole<sup>1</sup> **1** (6 g, 11.13.38 mmol) in dry THF (40 mL), dimethylamine (0.72 g, 16.06 mmol) and K<sub>2</sub>CO<sub>3</sub> (2.21 g, 16.06 mmol) were added. The reaction mixture was stirred at room temperature for 3 h. After completion of the reaction (monitored by TLC), the solvent was removed under *vacuo*, and the reaction mixture was dissolved in DCM (50 mL). It was then diluted with water (30 mL), and the combined organic layer was separated. The aqueous layer was extracted with DCM (10 mL), and the combined organic extracts were dried (Na<sub>2</sub>SO<sub>4</sub>). The solvent was removed under vacuum, and the product was triturated with cold MeOH to afford 2-((dimethylamino)methyl)-3-vinyl indole **5** (5.02 g, 91%) as a white crystalline solid. mp: 113-115 °C; <sup>1</sup>H NMR (300 MHz, CDCl<sub>3</sub>): δ 8.16 (d, *J* = 7.8 Hz, 1 H), 7.97 (d, *J* = 7.2 Hz, 2 H), 7.86 (d, *J* = 15.9 Hz, 1 H), 7.74 (d, *J* = 7.5 Hz, 1 H), 7.42 (t, *J* = 7.5 Hz, 1 H), 7.33-7.20 (m, 4 H), 6.47 (d, *J* = 16.2 Hz, 1 H), 4.2 (q, *J* = 6.9 Hz, 2 H), 3.89 (s, 2 H), 2.07 (s, 6 H), 1.26 (t, *J* = 6.9 Hz, 3H) ppm; <sup>13</sup>C NMR (75 MHz, CDCl<sub>3</sub>): δ 167.1, 140.0, 137.2, 135.5, 133.4, 128.6, 127.0, 126.8, 125.4, 124.0, 120.4, 119.9, 118.1, 115.1, 60.5, 52.1, 44.4, 14.3 ppm; DEPT-135 NMR (75 MHz, CDCl<sub>3</sub>): δ 135.4, 133.4, 128.6, 127.0, 125.3, 124.0, 120.3, 119.8, 115.0, 60.4, 52.0, 44.4, 14.3 ppm.

### (*E*)-1-(3-(3-Ethoxy-3-oxoprop-1-en-1-yl)-1-(phenylsulfonyl)-1*H*-indol-2-yl)-*N,N,N*-trimethylmethanaminium trifluoromethanesulfonate **6a**

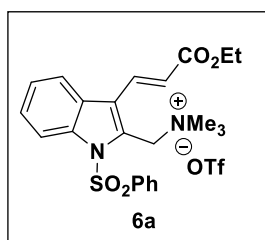

To a solution of amine compound **5** (5.0 g, 12.12 mmol) in dry THF (40 mL), MeOTf (2.19 g, 13.33 mmol) was added dropwise at 0 °C, then allowed to stir at rt for 20 minutes. Removal of solvent followed by the trituration of the crude product with diethyl ether (60 mL) afforded amine salt **6a** (6.63 g, 95%) as colorless solid. The amine salt **6a** was stored at 0 °C under inert atmosphere. mp: 184-186 °C; <sup>1</sup>H NMR (300 MHz, DMSO-*d*<sub>6</sub>): δ 8.21 (d, *J* = 8.1 Hz, 1 H), 7.98-7.90 (m, 2 H), 7.81 (d, *J* = 7.8 Hz, 2 H), 7.65 (t, *J* = 6.9 Hz, 1 H), 7.60-7.44 (m, 4 H),

6.74 (d,  $J = 16.2$  Hz, 1 H), 5.37 (s, 2 H), 4.25 (q,  $J = 6.6$  Hz, 2 H), 3.20 (s, 9 H), 1.29 (t,  $J = 6.9$  Hz, 3 H) ppm;  $^{13}\text{C}$  NMR (75 MHz, DMSO- $d_6$ ):  $\delta$  165.5, 137.5, 135.3, 135.1, 133.3, 129.6, 128.2, 127.6, 127.1, 126.9, 126.5, 125.6, 124.6, 121.5, 116.0, 60.4, 58.1, 53.2, 14.0 ppm.

**Attempted synthesis of ethyl (*E*)-3-(2-(3-phenylprop-2-yn-1-yl)-1-(phenylsulfonyl)-1*H*-indol-3-yl)acrylate **3** from amine salt **6a****

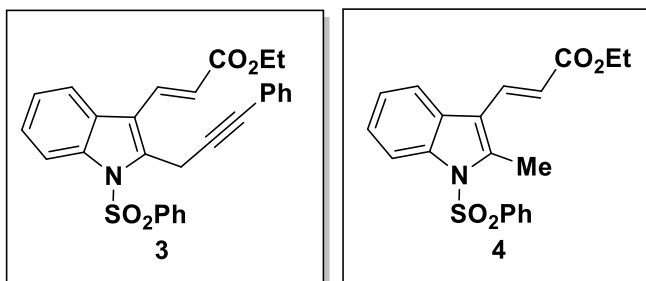

The reaction of amine salt **6a** (0.3 g, 0.52 mmol) with phenylacetylene (80 mg, 0.78 mmol) in the presence of Pd(PPh<sub>3</sub>)<sub>4</sub> (60 mg, 0.05 mmol), K<sub>2</sub>CO<sub>3</sub> (72 mg, 0.52 mmol) in a dry toluene (5 mL) at 100 °C for 8 h. After the reaction was completion (monitored by TLC), the reaction mixture was cooled to room temperature, the reaction mixture was quenched by water and extracted with ethyl acetate (2 x 20 mL). The combined organic layer was dried (Na<sub>2</sub>SO<sub>4</sub>) and evaporated under *vacuo* followed by column chromatographic purification on silica gel (230-420 mesh, n-hexane/ethyl acetate, 19:1) afforded 2-methyl-3-vinylindole **4** (48 mg, 25%) as a colorless solid; mp: 203-205 °C. Further elution of the column (n-hexane/ethyl acetate, 9:1) afforded carbazole **7a** (0.103 g, 42%) as a colorless solid; mp: 145-1148 °C.

**Attempted synthesis of ethyl 2-(2-ethoxy-2-oxoethyl)-9-(phenylsulfonyl)-9*H*-carbazole-3-carboxylate **7r****

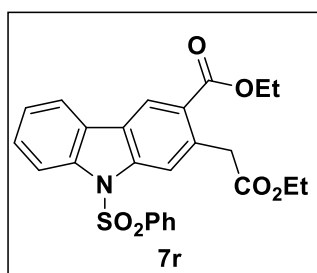

The reaction of amine salt **6a** (0.3 g, 0.52 mmol) with ethyl propiolate (77 mg, 0.78 mmol) in the presence of Pd(PPh<sub>3</sub>)<sub>4</sub> (60 mg, 0.05 mmol), K<sub>2</sub>CO<sub>3</sub> (36 mg, 0.26 mmol) in a mixture of DMSO (0.8 mL) and dry toluene (4.8 mL) at 100 °C for 8 h followed by workup using the above mentioned procedure failed to give the expected carbazole **7r**, instead 2-methyl-3-vinylindole **4** (198 mg, 80%) was isolated.

### Attempted synthesis of ethyl 9-(phenylsulfonyl)-2-(pyridin-2-ylmethyl)-9H-carbazole-3-carboxylate **7s**

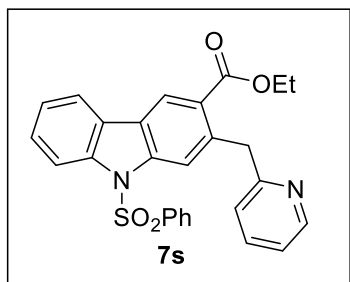

The reaction of amine salt **6a** (0.3 g, 0.52 mmol) with 2-ethynylpyridine (80 mg, 0.78 mmol) in the presence of Pd(PPh<sub>3</sub>)<sub>4</sub> (60 mg, 0.05 mmol), K<sub>2</sub>CO<sub>3</sub> (36 mg, 0.26 mmol) in a mixture of DMSO (0.8 mL) and dry toluene (4.8 mL) at 100 °C for 8 h followed by workup using the above mentioned procedure failed to give the expected carbazole **7s**.

### Methyl (*E*)-3-(2-((dimethylamino)methyl)-1-(phenylsulfonyl)-1*H*-indol-3-yl)but-2-enoate

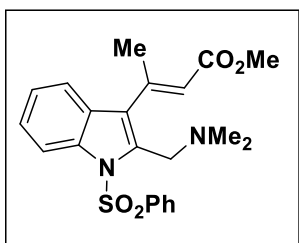

A mixture of methyl (*E*)-3-(2-(bromomethyl)-1-(phenylsulfonyl)-1*H*-indol-3-yl)but-2-enoate<sup>2</sup> (5.2 g, 11.59 mmol) in dry THF, dimethylamine (0.63 g, 13.92 mmol) and K<sub>2</sub>CO<sub>3</sub> (1.92 g, 13.92 mmol) were added, the reaction mixture was stirred at room temperature for 3 h. Then the THF solvent was removed under *vacuo* and the reaction mixture dissolved in DCM. It was then diluted with water (10 mL) and the combined organic layer was separated. The aqueous layer was extracted with DCM (10 mL) and the combined organic extracts were dried (Na<sub>2</sub>SO<sub>4</sub>). The crude product methyl (*E*)-3-(2-((dimethylamino)methyl)-1-(phenylsulfonyl)-1*H*-indol-3-yl)but-2-enoate was used as such for next step without any further purification.

### ((Trifluoromethyl)sulfonyl)-11-oxidane, (*E*)-1-(3-(4-methoxy-4-oxobut-2-en-2-yl)-1-(phenylsulfonyl)-1*H*-indol-2-yl)-*N,N,N*-trimethylmethanaminium salt **6b**

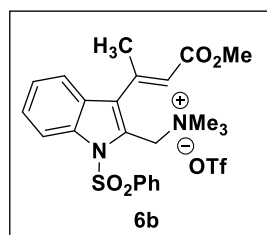

A mixture of methyl (*E*)-3-(2-((dimethylamino)methyl)-1-(phenylsulfonyl)-1*H*-indol-3-yl)but-2-enoate (4 g, 9.70 mmol) in dry THF (40 mL), MeOTF (1.75 g, 10.67 mmol) was added dropwise at 0 °C, then allowed to stir at rt for 20 minutes. Removal of solvent followed by trituration of the crude product with diethyl ether (60 mL) afforded amine salt **6b** (5.14 g, 92%) as pale yellow solid. The amine salt **6b** was stored at 0 °C under inert atmosphere. mp: 150-152 °C; <sup>1</sup>H NMR (300 MHz, DMSO-*d*<sub>6</sub>): δ 8.20 (d, *J* = 8.7 Hz, 1 H), 7.81 (d, *J* = 7.5 Hz, 2 H), 7.68 (t, *J* = 7.2 Hz, 1 H), 7.61-7.50 (m, 4 H), 7.42 (d, *J* = 7.8 Hz, 2 H), 6.02 (s, 1 H), 5.15 (broad s, 2 H), 3.77 (s, 3 H), 3.22 (m, 8 H), 2.50 (s, 3 H) ppm; <sup>13</sup>C NMR (75 MHz, DMSO-*d*<sub>6</sub>): δ 164.0, 144.5, 136.2, 136.0, 133.7, 133.5, 128.2, 127.3, 126.4, 125.3, 124.2, 122.5, 122.1, 119.9, 115.1, 57.9, 51.9, 49.8, 18.6 ppm.

**Ethyl (*E*)-3-(3-((dimethylamino)methyl)-1-(phenylsulfonyl)-1*H*-indol-2-yl)acrylate **10****

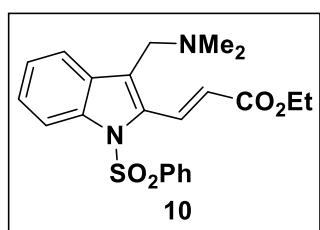

To a solution of ethyl (*E*)-3-(3-(bromomethyl)-1-(phenylsulfonyl)-1*H*-indol-2-yl)acrylate<sup>1</sup> (1 g, 2.24 mmol) in dry THF (20 mL), dimethylamine (0.121 g, 2.68 mmol) and K<sub>2</sub>CO<sub>3</sub> (0.37 g, 2.68 mmol) were added, the reaction mixture was stirred at room temperature for 3 h. Then the THF solvent was removed under *vacuo* and the reaction mixture dissolved in DCM (20 mL). It was then diluted with water (10 mL) and the combined organic layer was separated. The aqueous layer was extracted with DCM (2 x 10 mL) and the combined organic extract was dried (Na<sub>2</sub>SO<sub>4</sub>). The solvent was removed under *vacuo* and trituated with cold MeOH (10 mL) to afford 3-((dimethylamino)methyl)-2-vinyl indole **10** (0.84 g, 91%) as a colorless solid. mp: 112-114 °C; <sup>1</sup>H NMR (300 MHz, CDCl<sub>3</sub>): δ 8.15-8.07 (m, 2 H), 7.58 (d, *J* = 7.2 Hz, 2 H), 7.38 (t, *J* = 7.2 Hz, 1 H), 7.31-7.15 (m, 4 H), 6.55 (d, *J* = 15.9 Hz, 1 H), 4.24 (q, *J* = 7.2 Hz, 2 H), 3.34 (s, 2 H), 2.06 (s, 6 H), 1.30 (t, *J* = 7.2 Hz, 3 H) ppm; <sup>13</sup>C NMR (75 MHz, CDCl<sub>3</sub>): δ 166.5, 137.8, 137.3, 134.8, 133.7, 133.6, 131.4, 128.9, 126.6, 126.3, 125.0, 124.6, 124.3, 120.4, 115.6, 60.7, 53.3, 45.0, 14.3 ppm; DEPT-135 NMR (75 MHz, CDCl<sub>3</sub>): δ 133.7, 133.5, 128.9, 126.6, 126.2, 124.6, 124.2, 120.4, 115.5, 60.6, 53.3, 45.0, 14.3 ppm.

**(E)-1-(2-(3-ethoxy-3-oxoprop-1-en-1-yl)-1-(phenylsulfonyl)-1H-indol-3-yl)-N,N,N-trimethylmethanaminium trifluoromethanesulfonate 11**

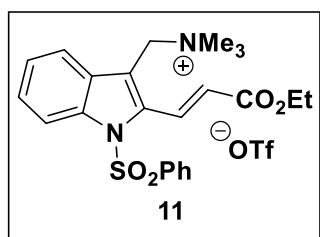

A mixture of 3-((dimethylamino)methyl)-2-vinyl indole **10** (0.5 g, 1.21 mmol) in dry THF (10 mL) and MeOTf (0.22 g, 1.33 mmol) was added dropwise at 0°C, and then allowed to stir for 20 minutes at room temperature. Removal of solvent afforded amine salt as a thick liquid. The <sup>1</sup>HNMR spectrum of crude product failed to confirm the formation of salt **11**.

**Ethyl (E)-3-(2-((dimethylamino)methyl)phenyl)acrylate**

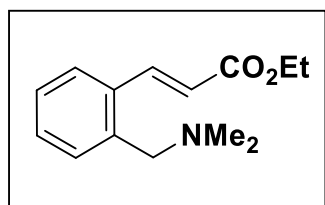

To a solution of ethyl (E)-3-(2-(bromomethyl)phenyl)acrylate<sup>3</sup> (2 g, 7.43 mmol) in dry THF (20 mL), dimethylamine (0.4 g, 8.92 mmol) and K<sub>2</sub>CO<sub>3</sub> (1.23 g, 8.92 mmol) were added, the reaction mixture was stirred at room temperature for 3 h. Then, the THF solvent was removed under *vacuo* and the reaction mixture dissolved in DCM. It was then diluted with water (10 mL) and the combined organic layer was separated. The aqueous layer was extracted with DCM (2 x 10 mL) and the combined organic extract was dried (Na<sub>2</sub>SO<sub>4</sub>). The crude product ethyl (E)-3-(2-((dimethylamino)methyl)phenyl)acrylate was used as such for next step without any further purification.

**(E)-1-(2-(3-Ethoxy-3-oxoprop-1-en-1-yl)phenyl)-N,N,N-trimethylmethanaminium trifluoromethanesulfonate 12**

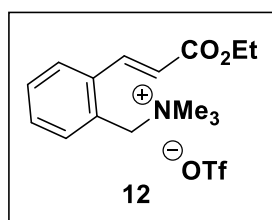

A mixture of ethyl (E)-3-(2-((dimethylamino)methyl)phenyl)acrylate (1.5 g, 6.43 mmol) in dry THF (20 mL), MeOTf (1.16 g, 7.07 mmol) was added dropwise at 0 °C, and allowed to stir for

30 minutes at rt. Subsequent removal of solvent followed by trituration of the crude product with diethyl ether afforded (*E*)-1-(2-(3-ethoxy-3-oxoprop-1-en-1-yl)phenyl)-*N,N,N*-trimethylmethanaminium trifluoromethanesulfonate **12** (1.68 g, 99%) as colorless solid. mp : 110-112 °C; <sup>1</sup>H NMR (300 MHz, DMSO-*d*<sub>6</sub>): δ 8.09 (d, *J* = 15.6 Hz, 1 H), 7.96 (d, *J* = 7.5 Hz, 1 H), 7.63-7.57 (m, 3 H), 6.67 (d, *J* = 15.6 Hz, 1 H), 4.78 (s, 2 H), 4.78 (q, *J* = 7.2 Hz, 2 H), 3.01 (s, 9 H), 1.28 (t, *J* = 6.9 Hz, 1 H) ppm; <sup>13</sup>C NMR (75 MHz, DMSO-*d*<sub>6</sub>): δ 165.8, 140.9, 136.7, 135.2, 131.0, 130.2, 128.1, 127.5, 122.1, 64.3, 60.3, 52.1, 14.1 ppm; DEPT-135 NMR (75 MHz, DMSO-*d*<sub>6</sub>): δ 141.4, 135.7, 131.5, 130.7, 128.6, 122.6, 64.8, 60.8, 52.6, 14.6 ppm.

### Representative Gram Scale synthesis

#### Ethyl 2-benzyl-9-(phenylsulfonyl)-9*H*-carbazole-3-carboxylate **7a**

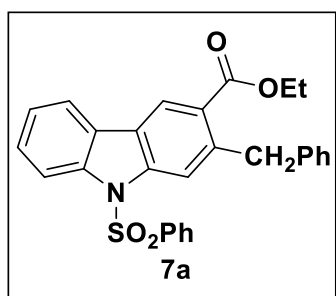

The reaction of amine salt **6a** (0.3 g, 0.52 mmol) with phenylacetylene (80 mg, 0.78 mmol) in the presence of Pd(PPh<sub>3</sub>)<sub>4</sub> (60 mg, 0.05 mmol), K<sub>2</sub>CO<sub>3</sub> (36 mg, 0.26 mmol) in a mixture of DMSO (0.8 mL) and dry toluene (4.8 mL) at 100 °C for 8 h followed by workup using the above mentioned procedure gave carbazole **7a** (0.218 g, 89%) as a colorless solid.



## References

1. A. K. Mohanakrishnan and P. C. Srinivasan, *J. Org. Chem.*, 1995, **60**, 1939-1946.
2. P. Raju, G. Gobi Rajeshwaran and A. K. Mohanakrishnan, *Eur. J. Org. Chem.*, 2015, 7173-7145.
3. M. Grübel, C. Jandl and T. Bach, *Synlett*, 2019, **30**, 1825-1829.

AG-83

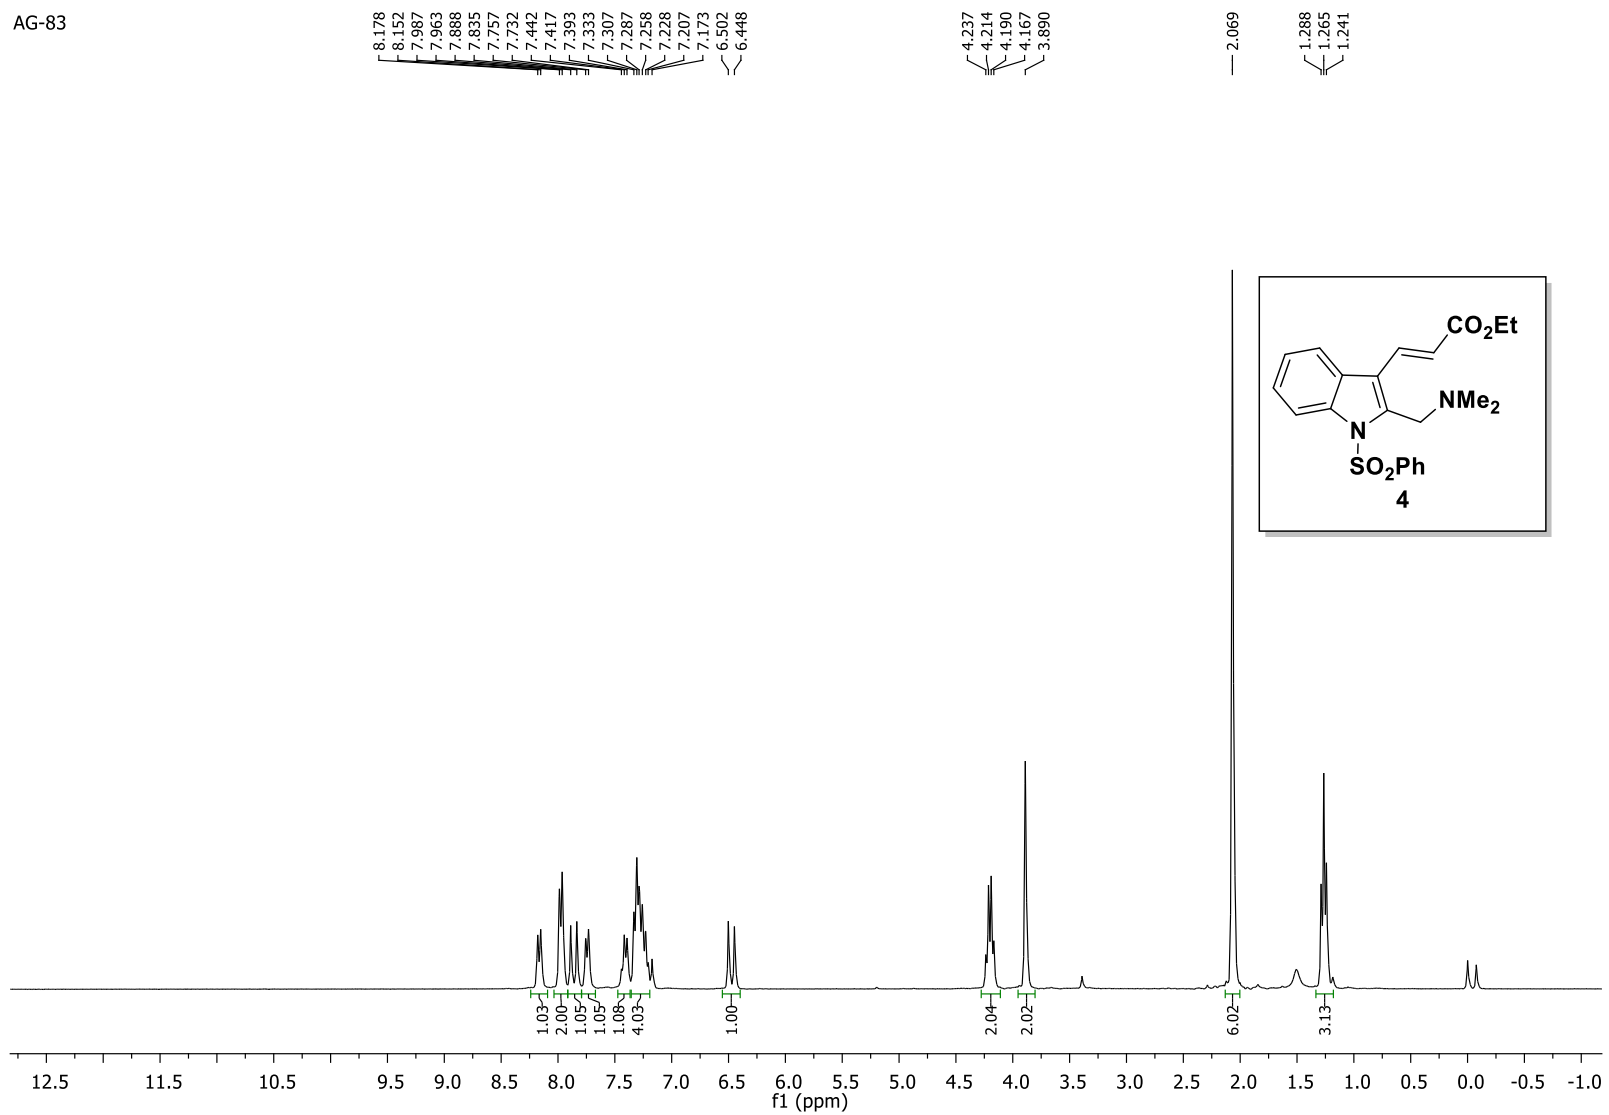

$^1\text{H}$  NMR (300 MHz,  $\text{CDCl}_3$ ) spectrum of compound 4

AG-83

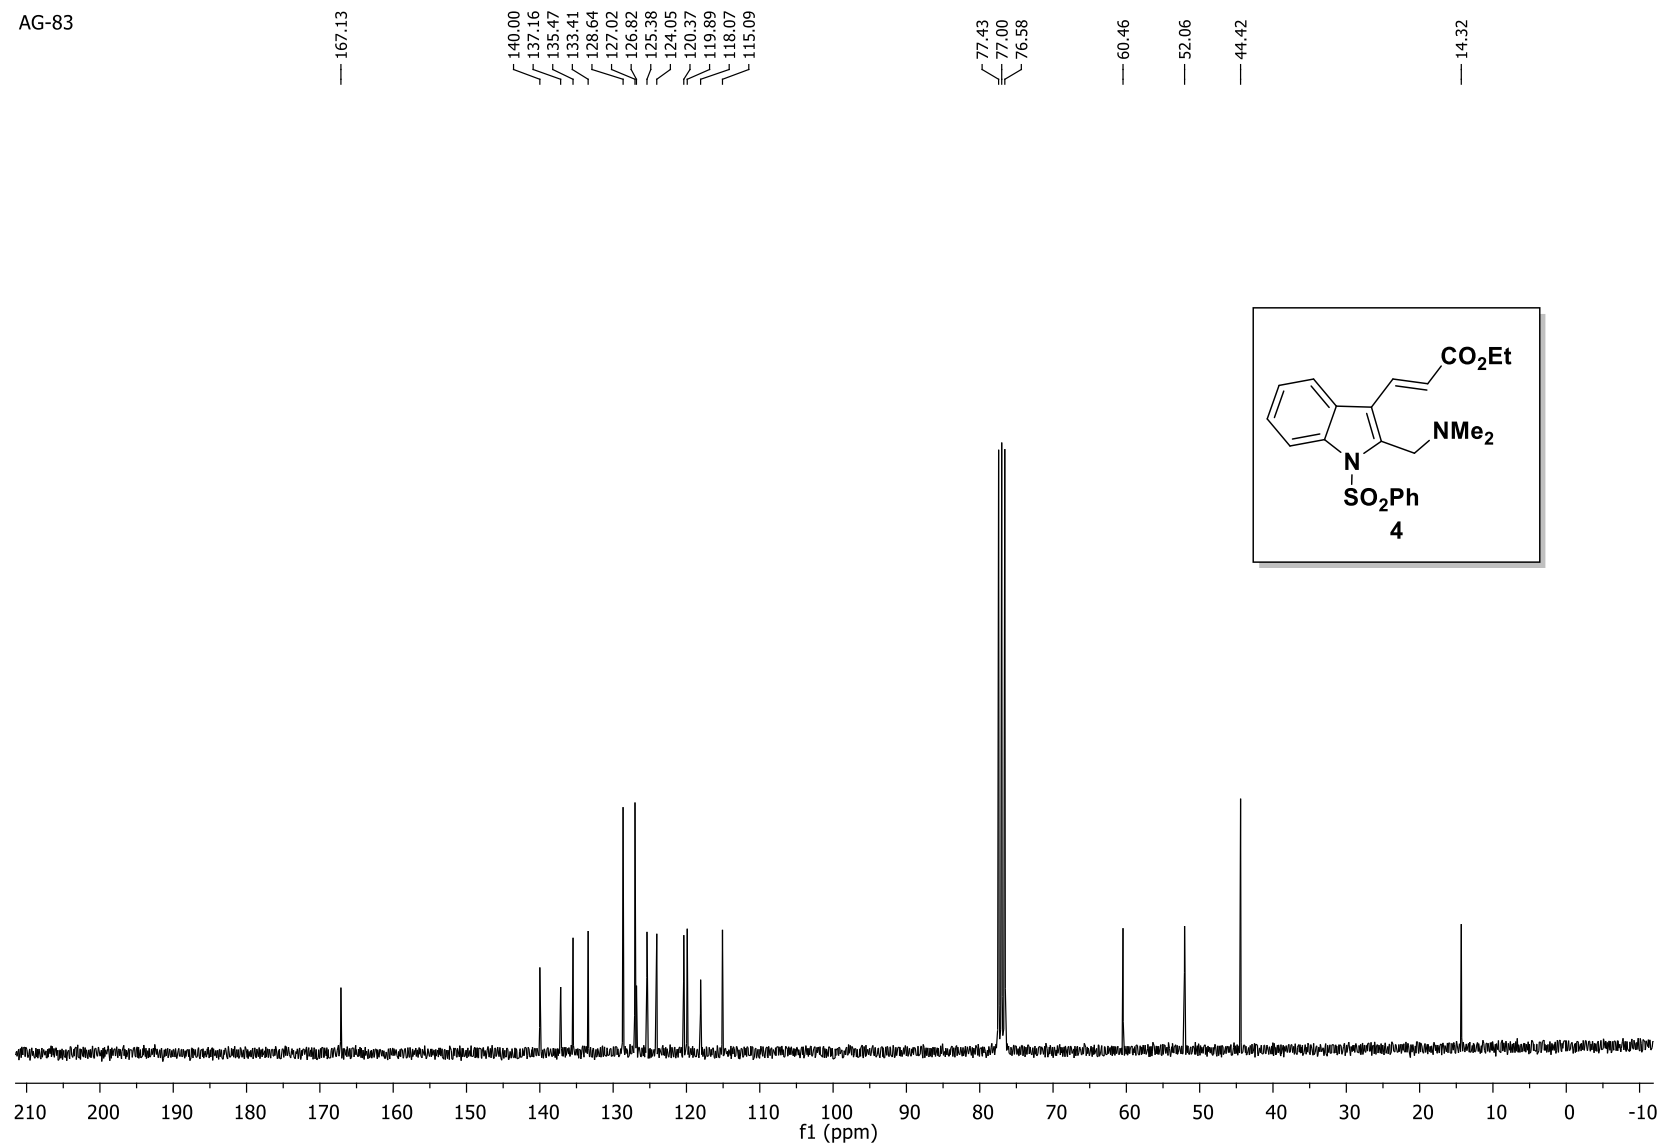

<sup>13</sup>C {<sup>1</sup>H} NMR (75 MHz, CDCl<sub>3</sub>) spectrum of compound **4**

AG-83

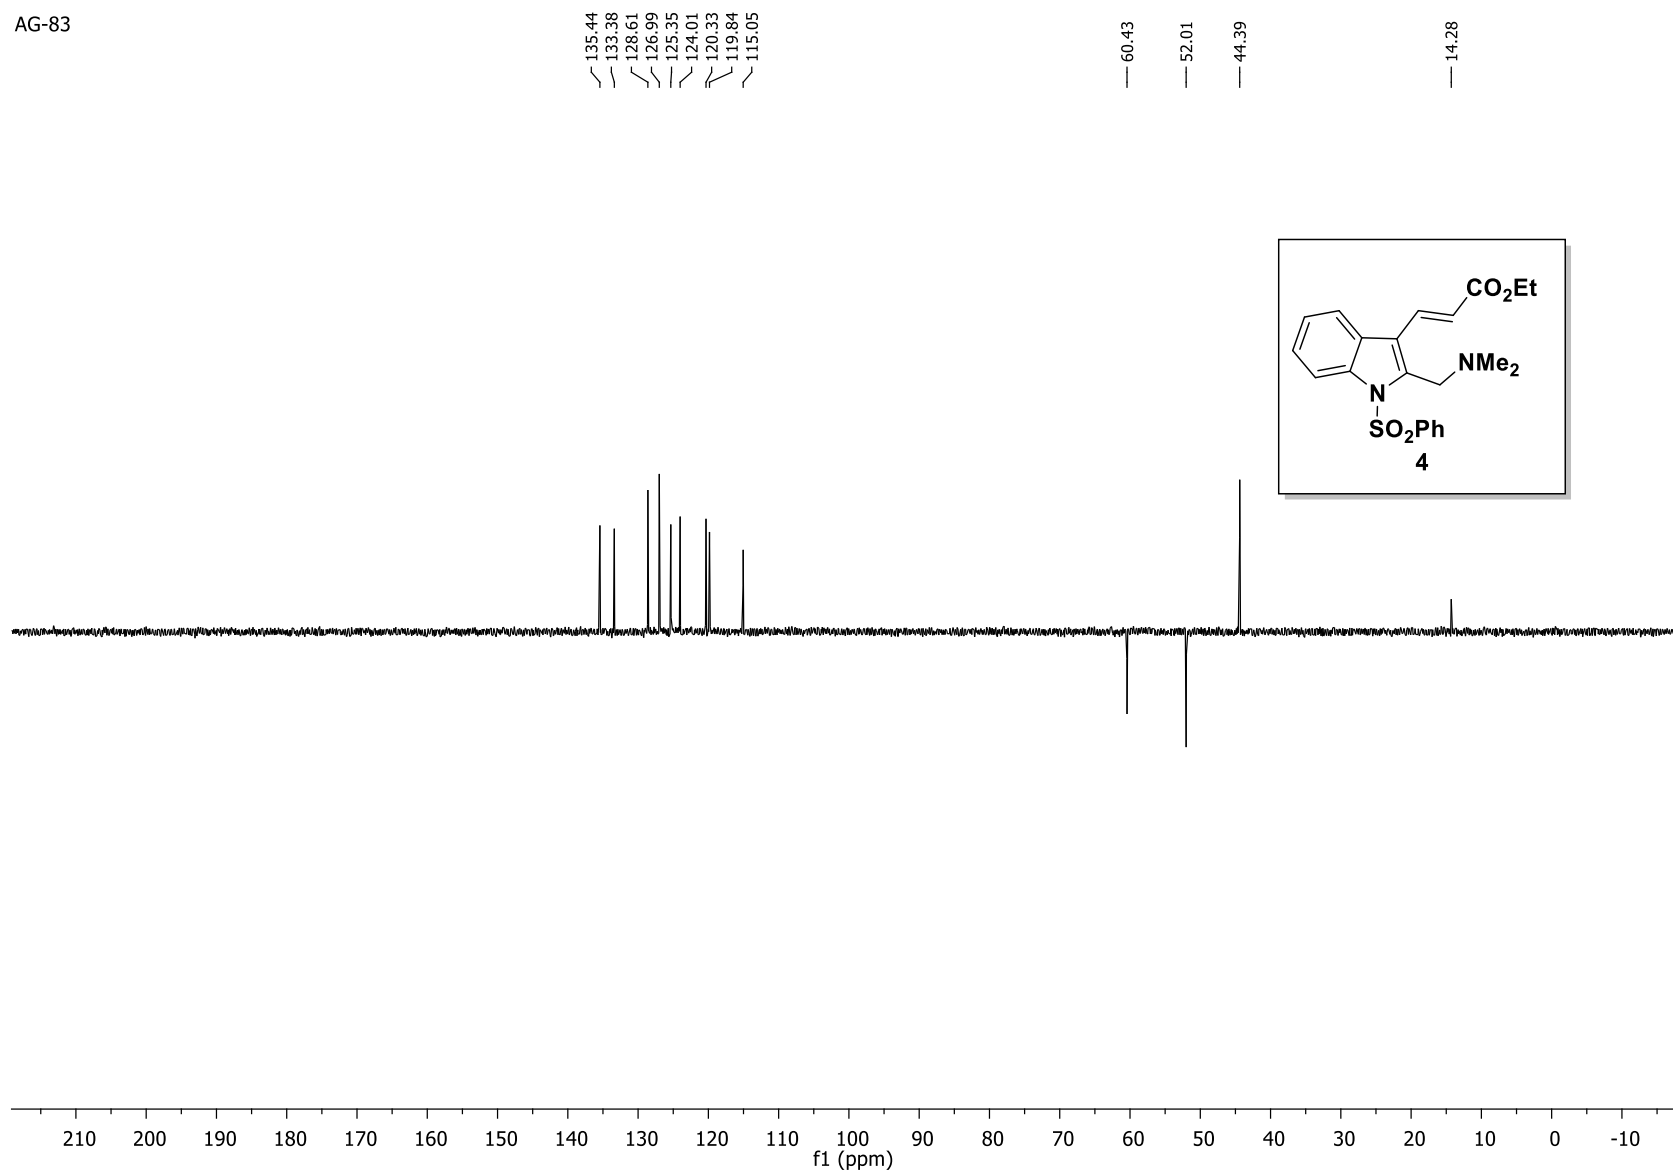

DEPT-135 NMR (75 MHz, CDCl<sub>3</sub>) spectrum of compound 4

AG-129

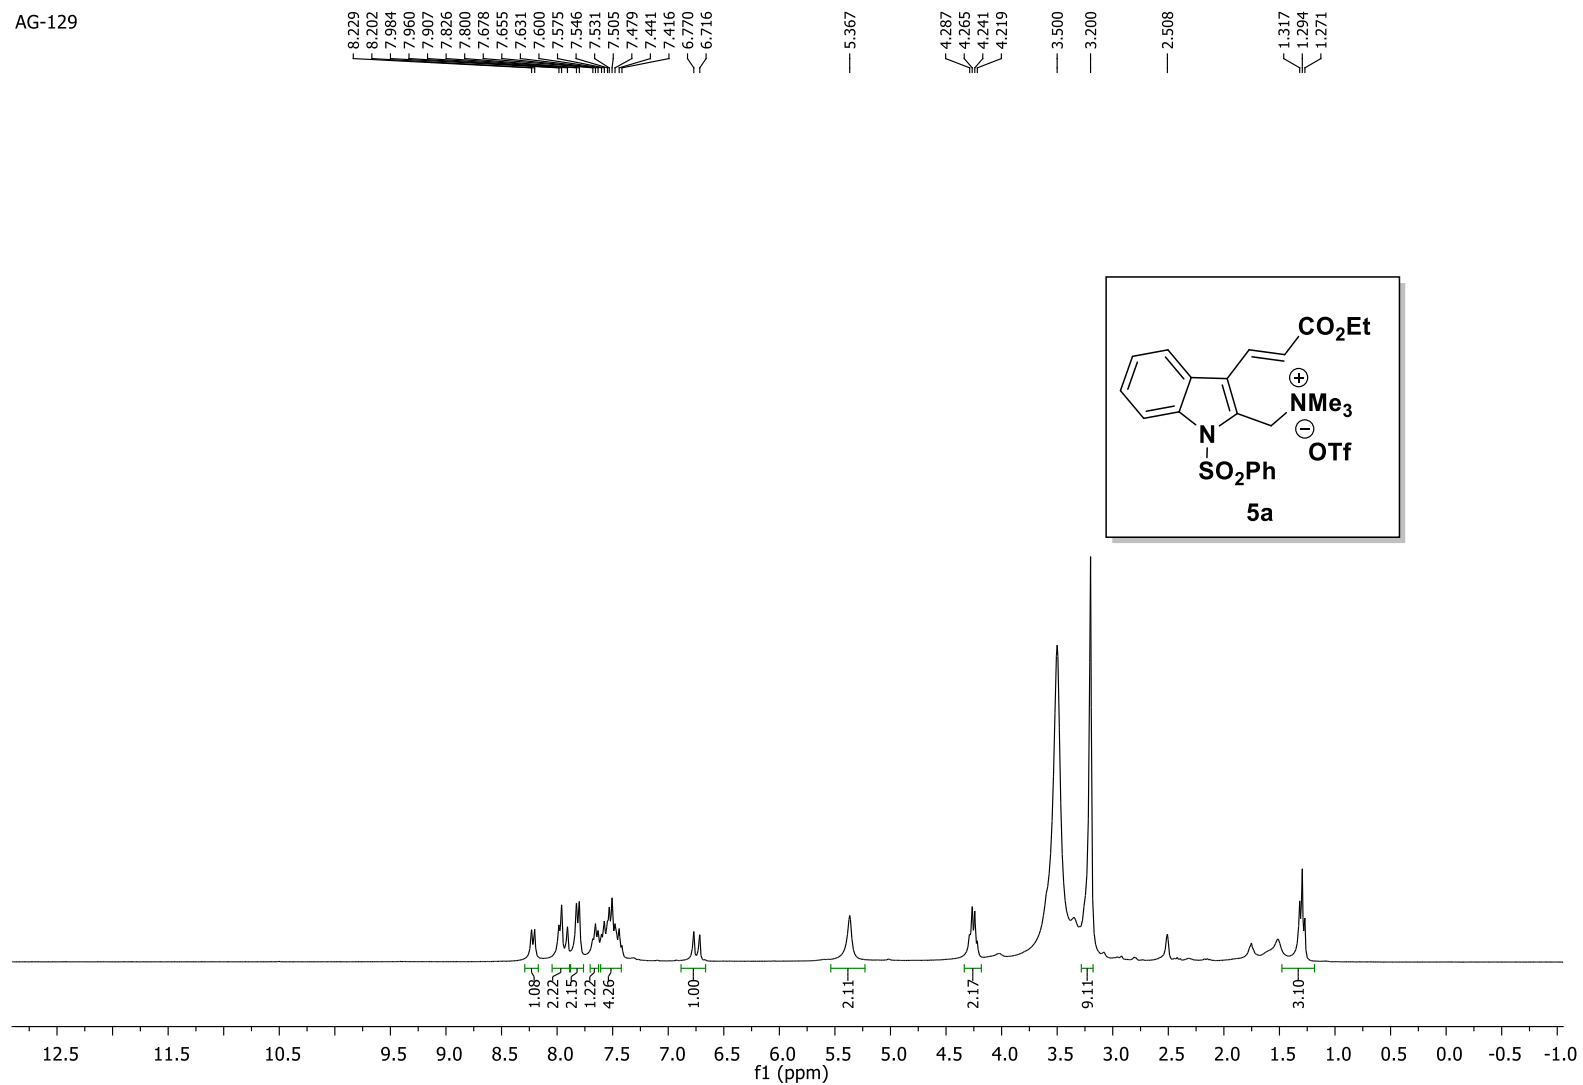

$^1\text{H}$  NMR (300 MHz,  $\text{DMSO}-d_6$ ) spectrum of compound **5a**

AG-129-C13

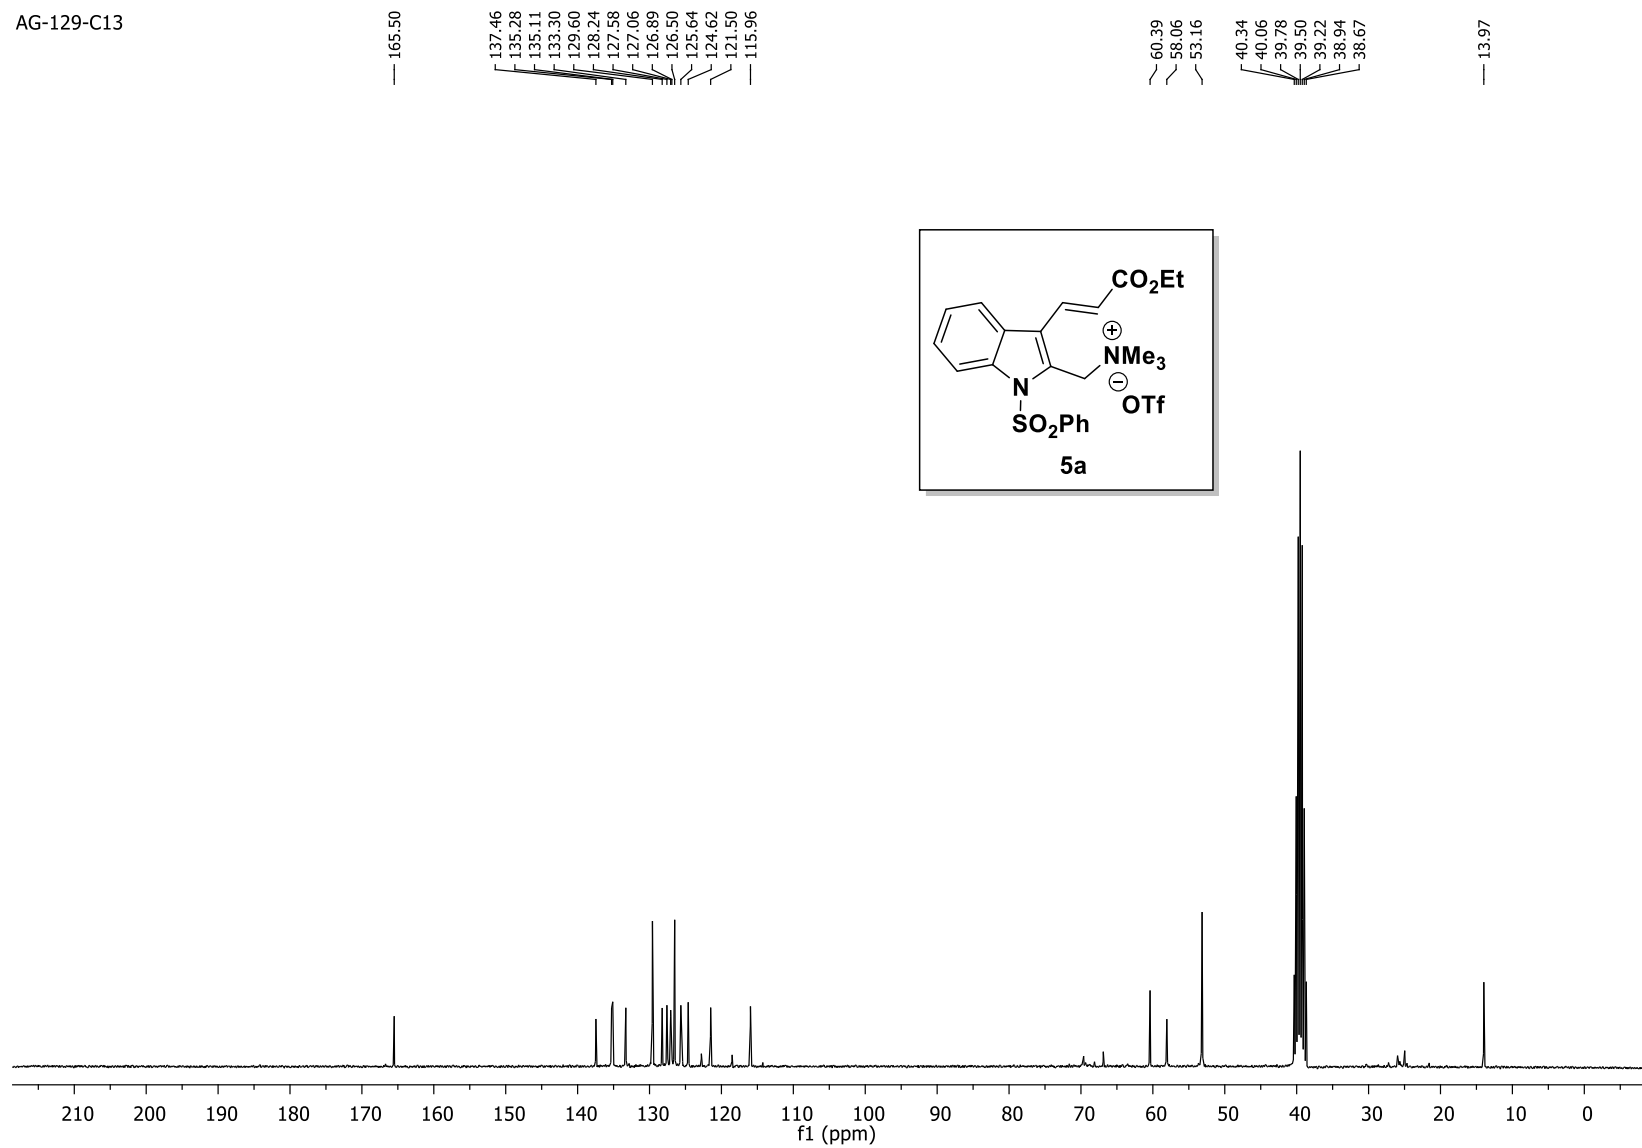

$^{13}\text{C} \{^1\text{H}\}$  NMR (75 MHz,  $\text{DMSO-}d_6$ ) spectrum of compound **5a**

DR.AKM  
AG-AMINE SALT 39 (1.448) Cm (37:45)

1: TOF MS ES+  
1.95e6

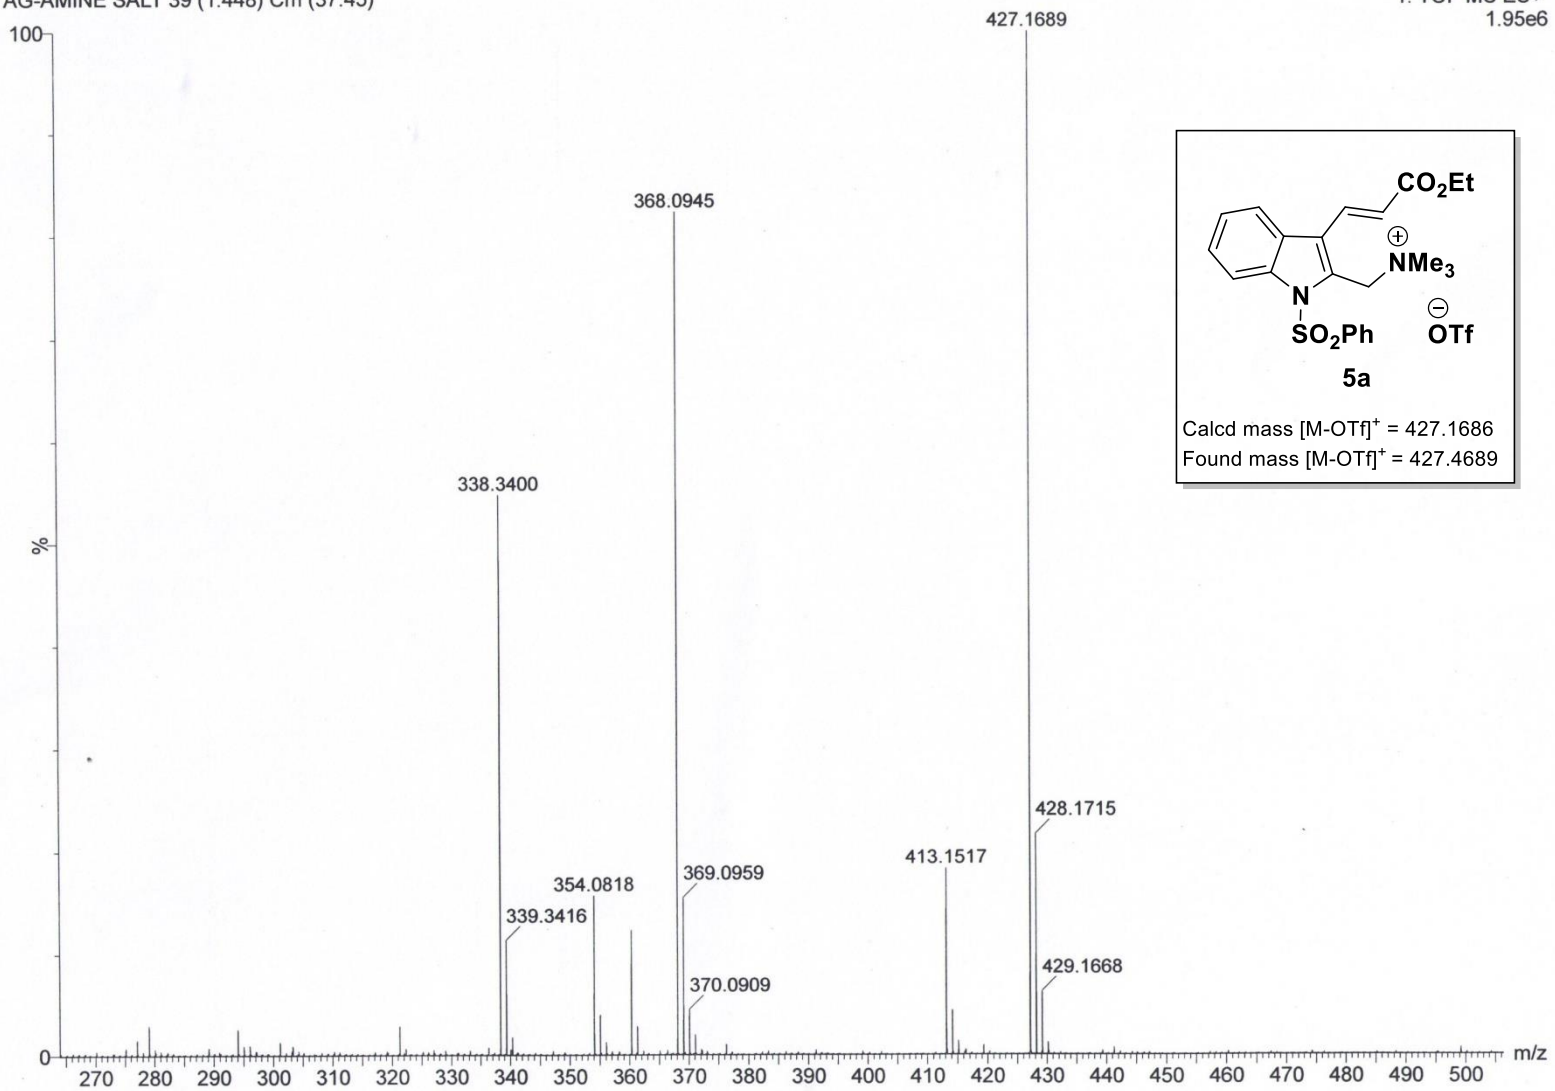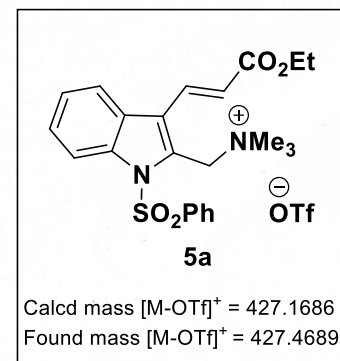

HRMS Spectrum of compound 5a

AG-Carbazole-A-1

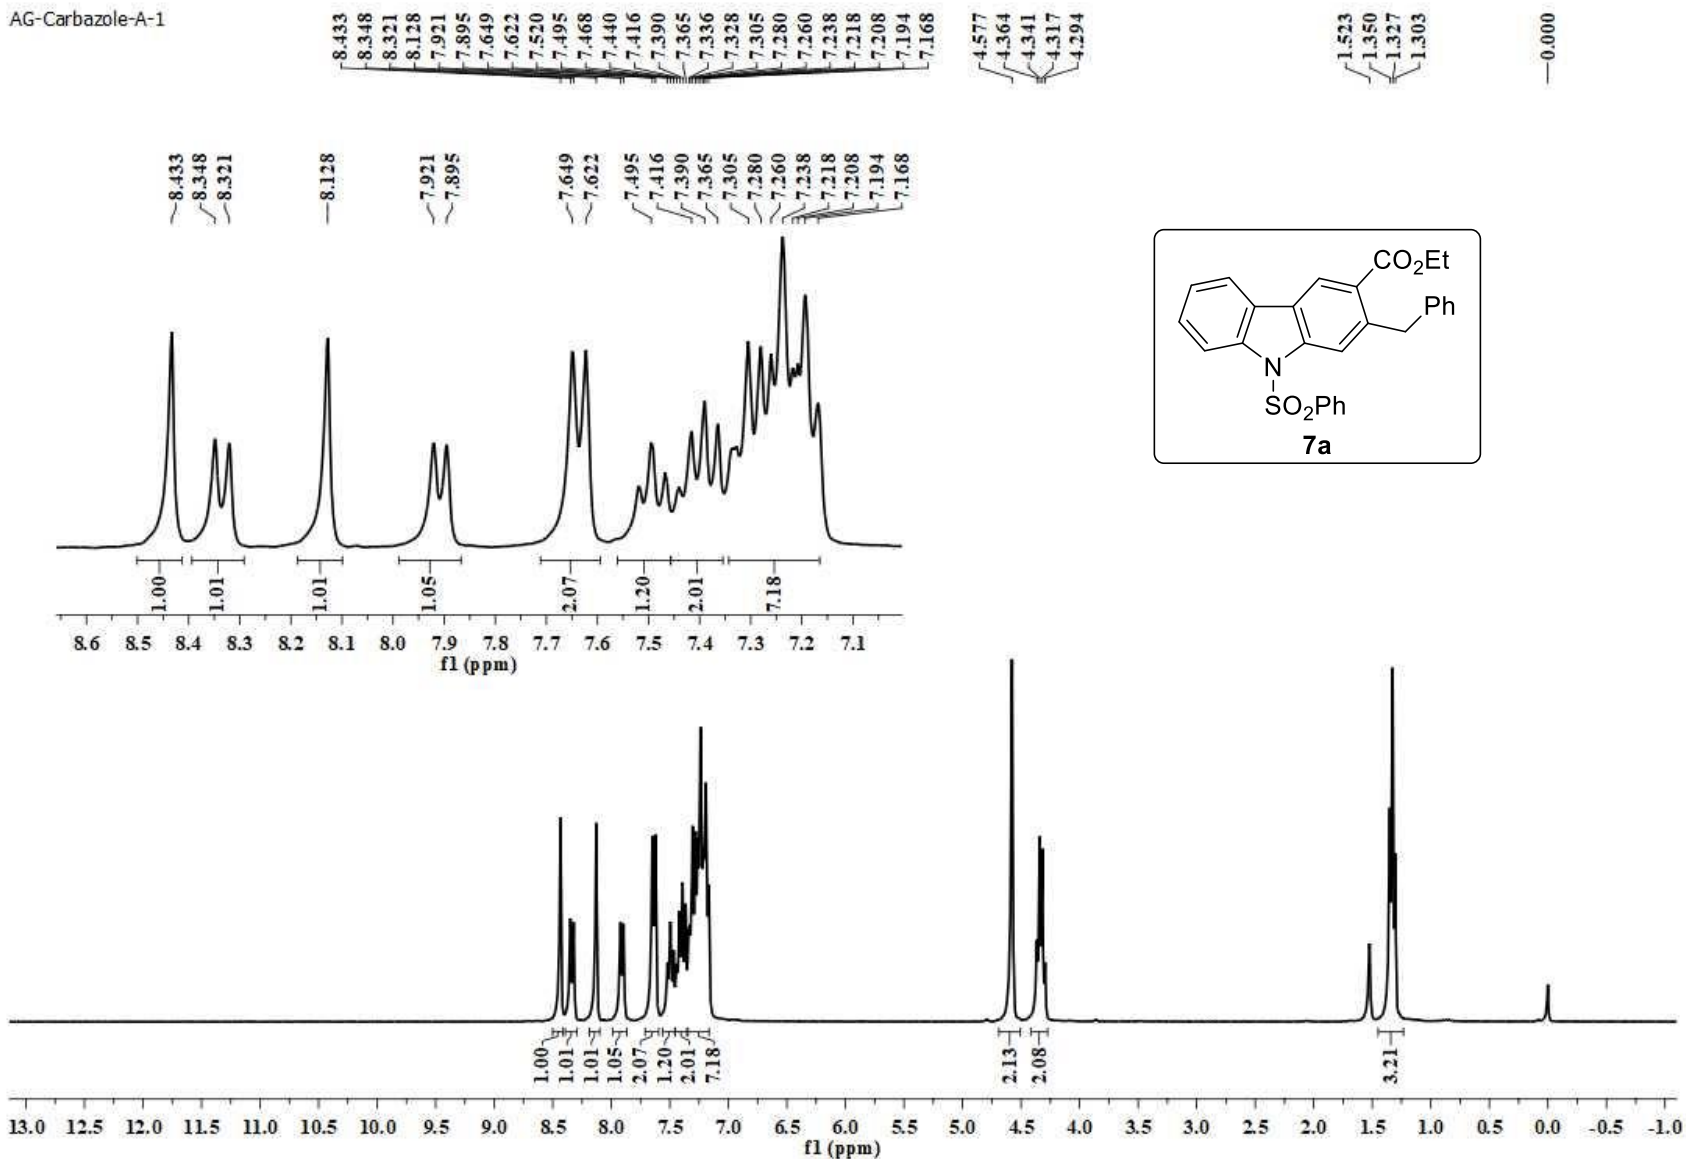

<sup>1</sup>H NMR (300 MHz, CDCl<sub>3</sub>) spectrum of compound **7a**



AG-Carbazole-A-1

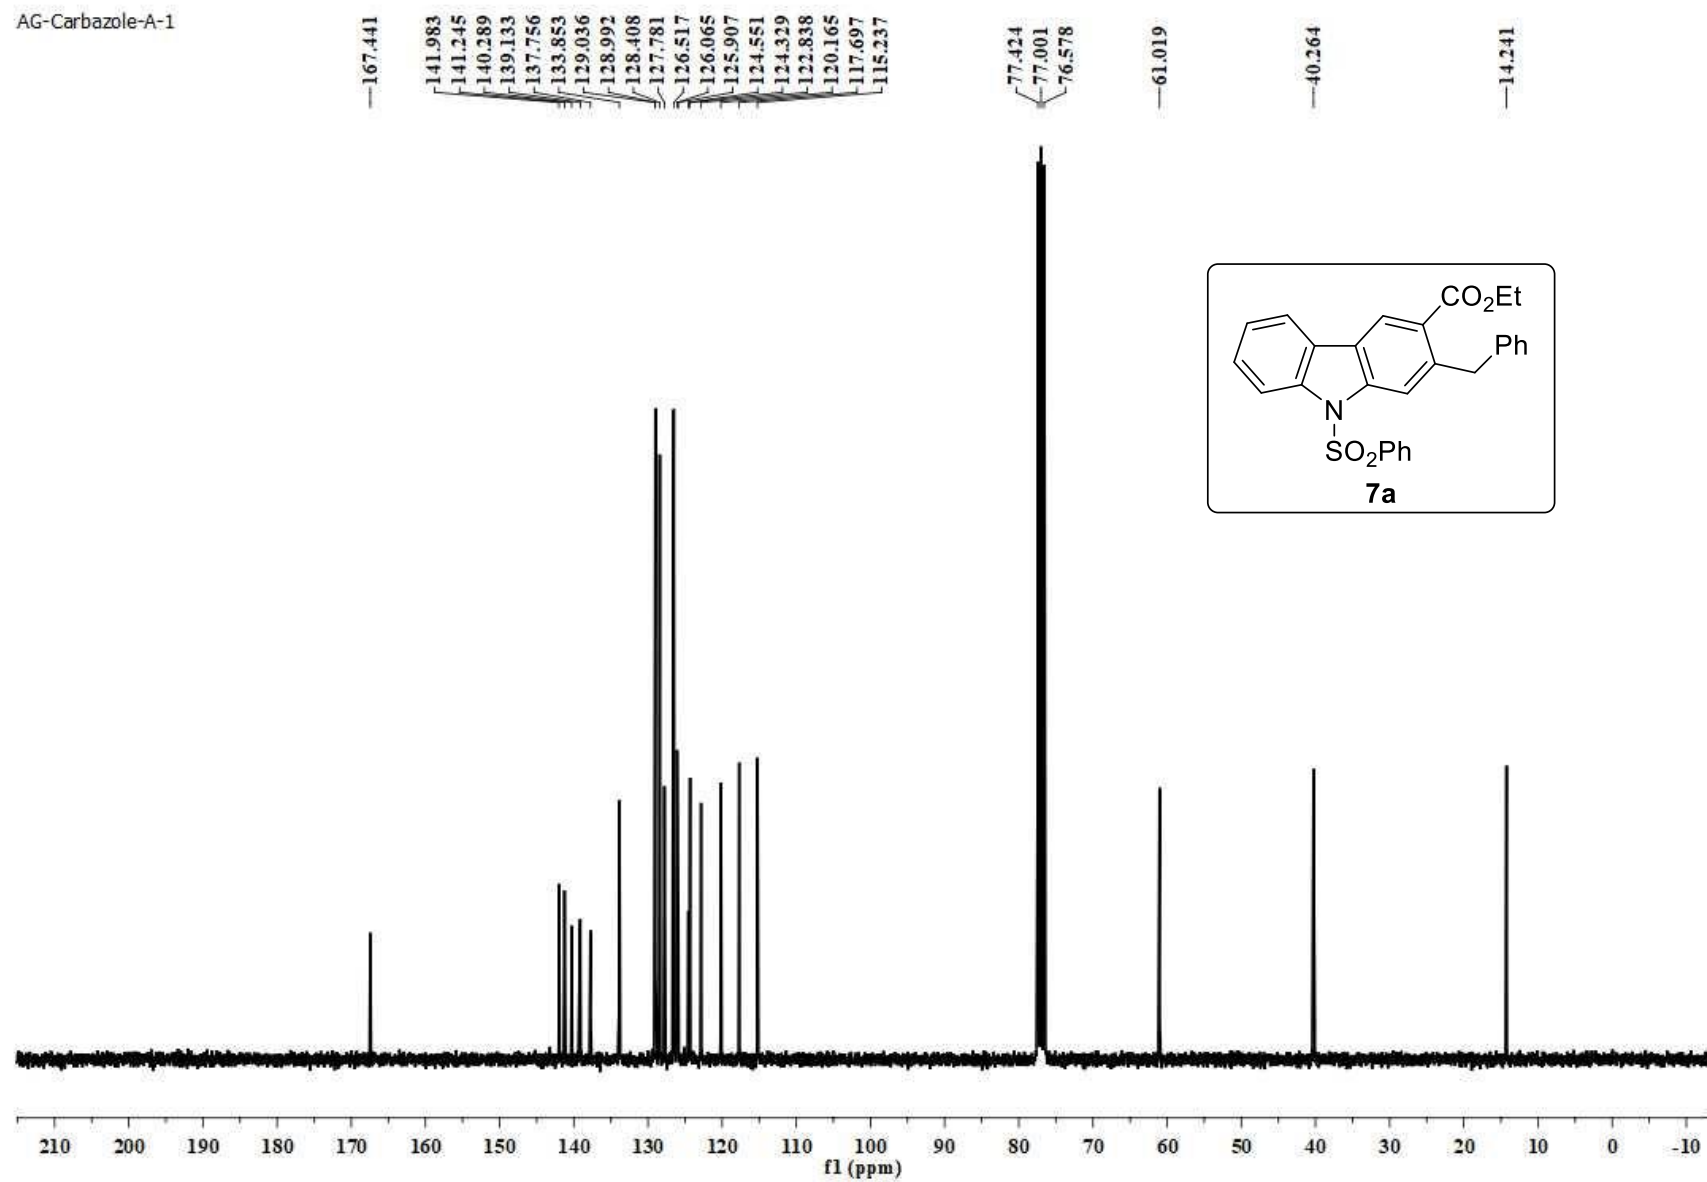

$^{13}\text{C} \{^1\text{H}\}$  NMR (75 MHz,  $\text{CDCl}_3$ ) spectrum of compound **7a**

AG-Carbazole-A-1

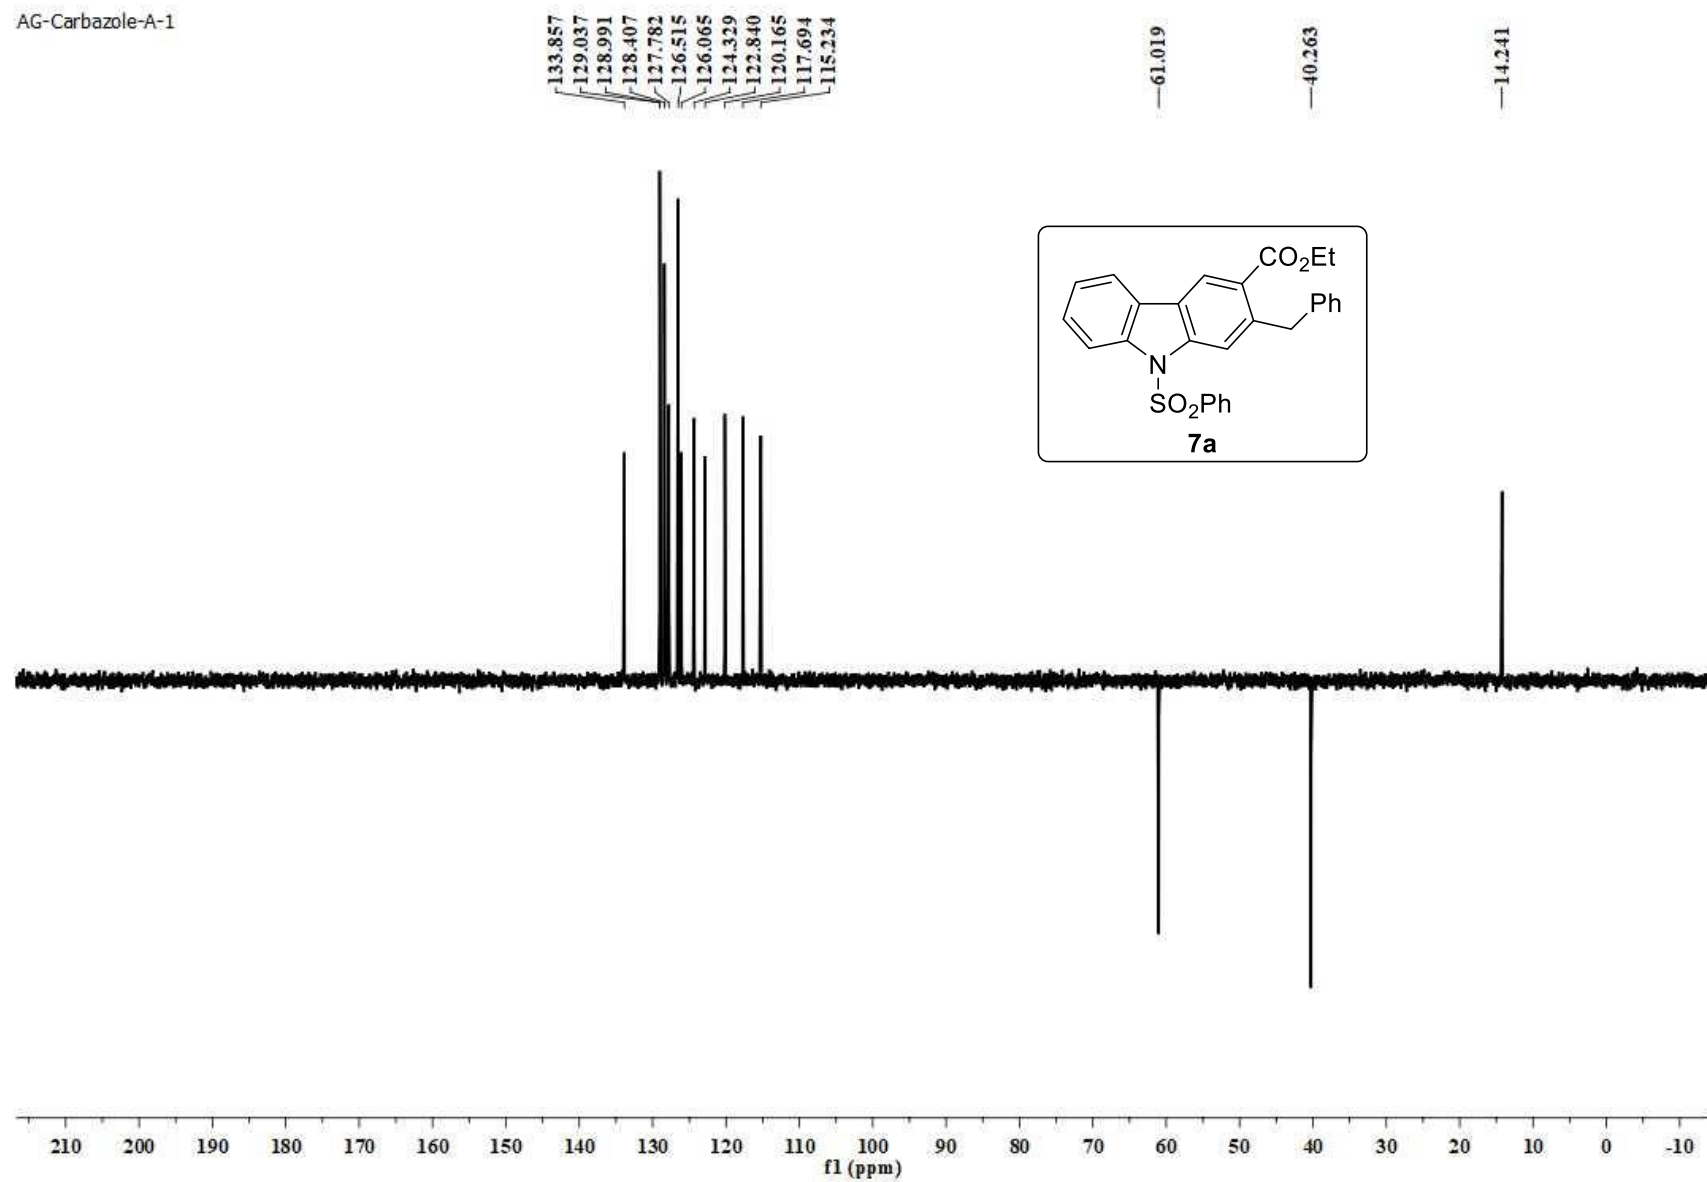

DEPT-135 NMR (75 MHz, CDCl<sub>3</sub>) spectrum of compound **7a**

DRAKM  
AG-CARBAZOLE-A1-R 29 (1.081) AM2 (Ar,20000.0,556.28,0.00,LS 10)

1: TOF MS ES+  
5.04e5

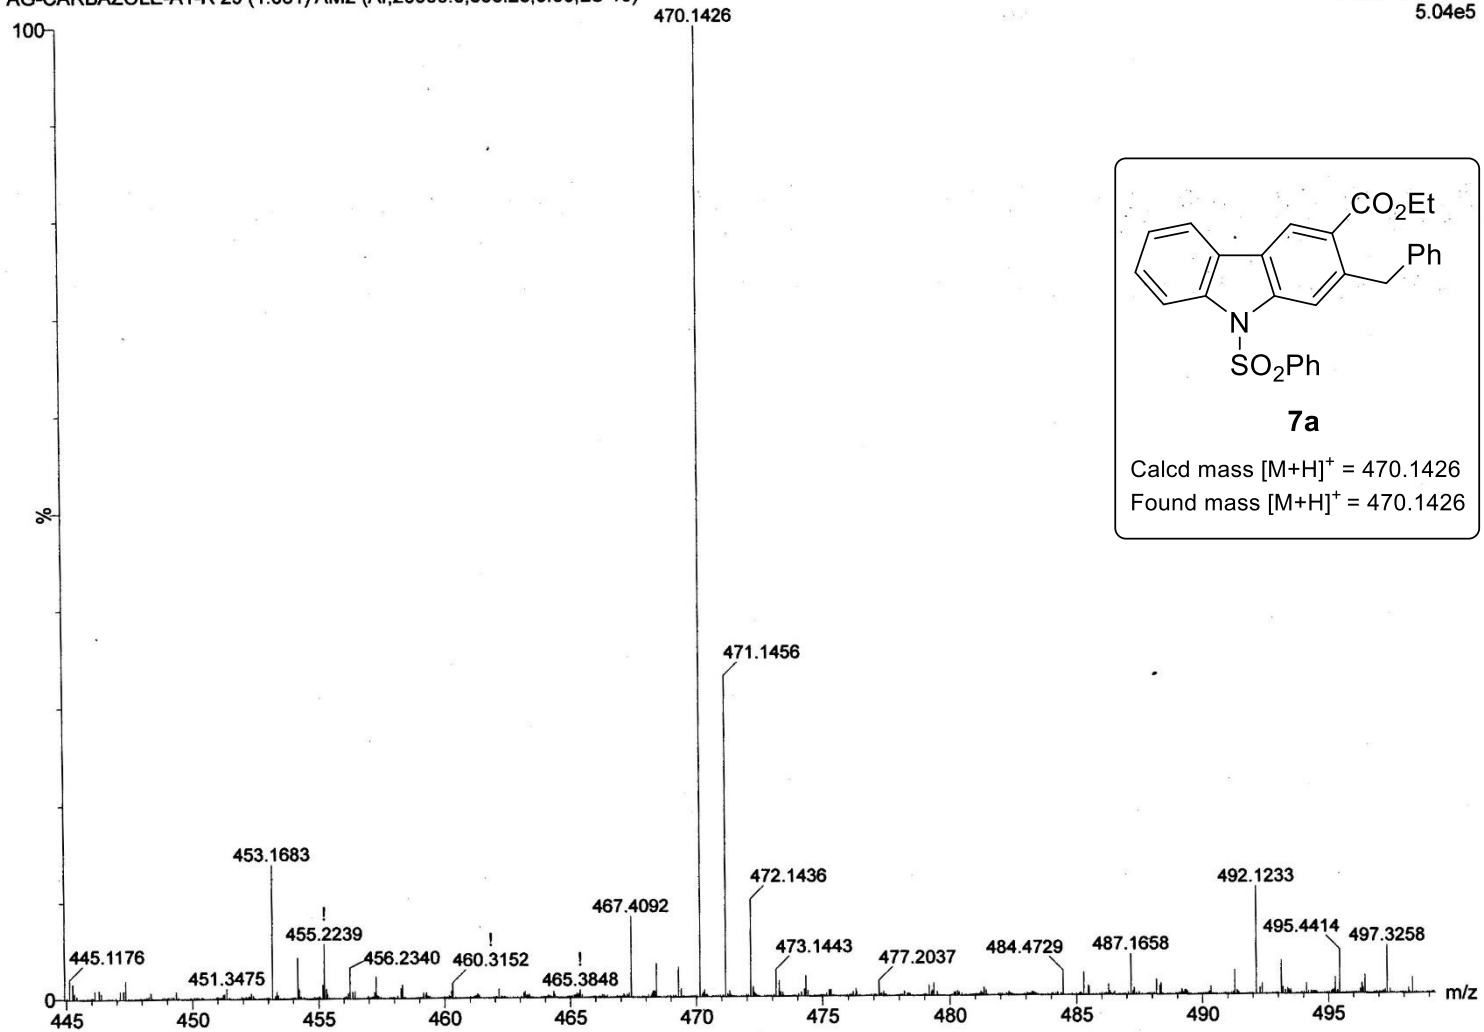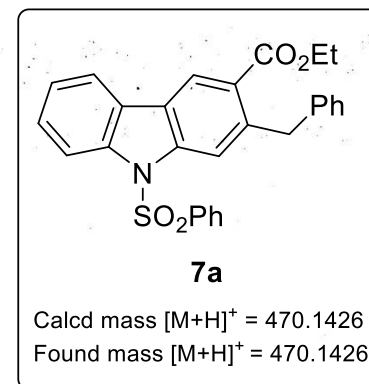

HRMS Spectrum of compound 7a

AG-664

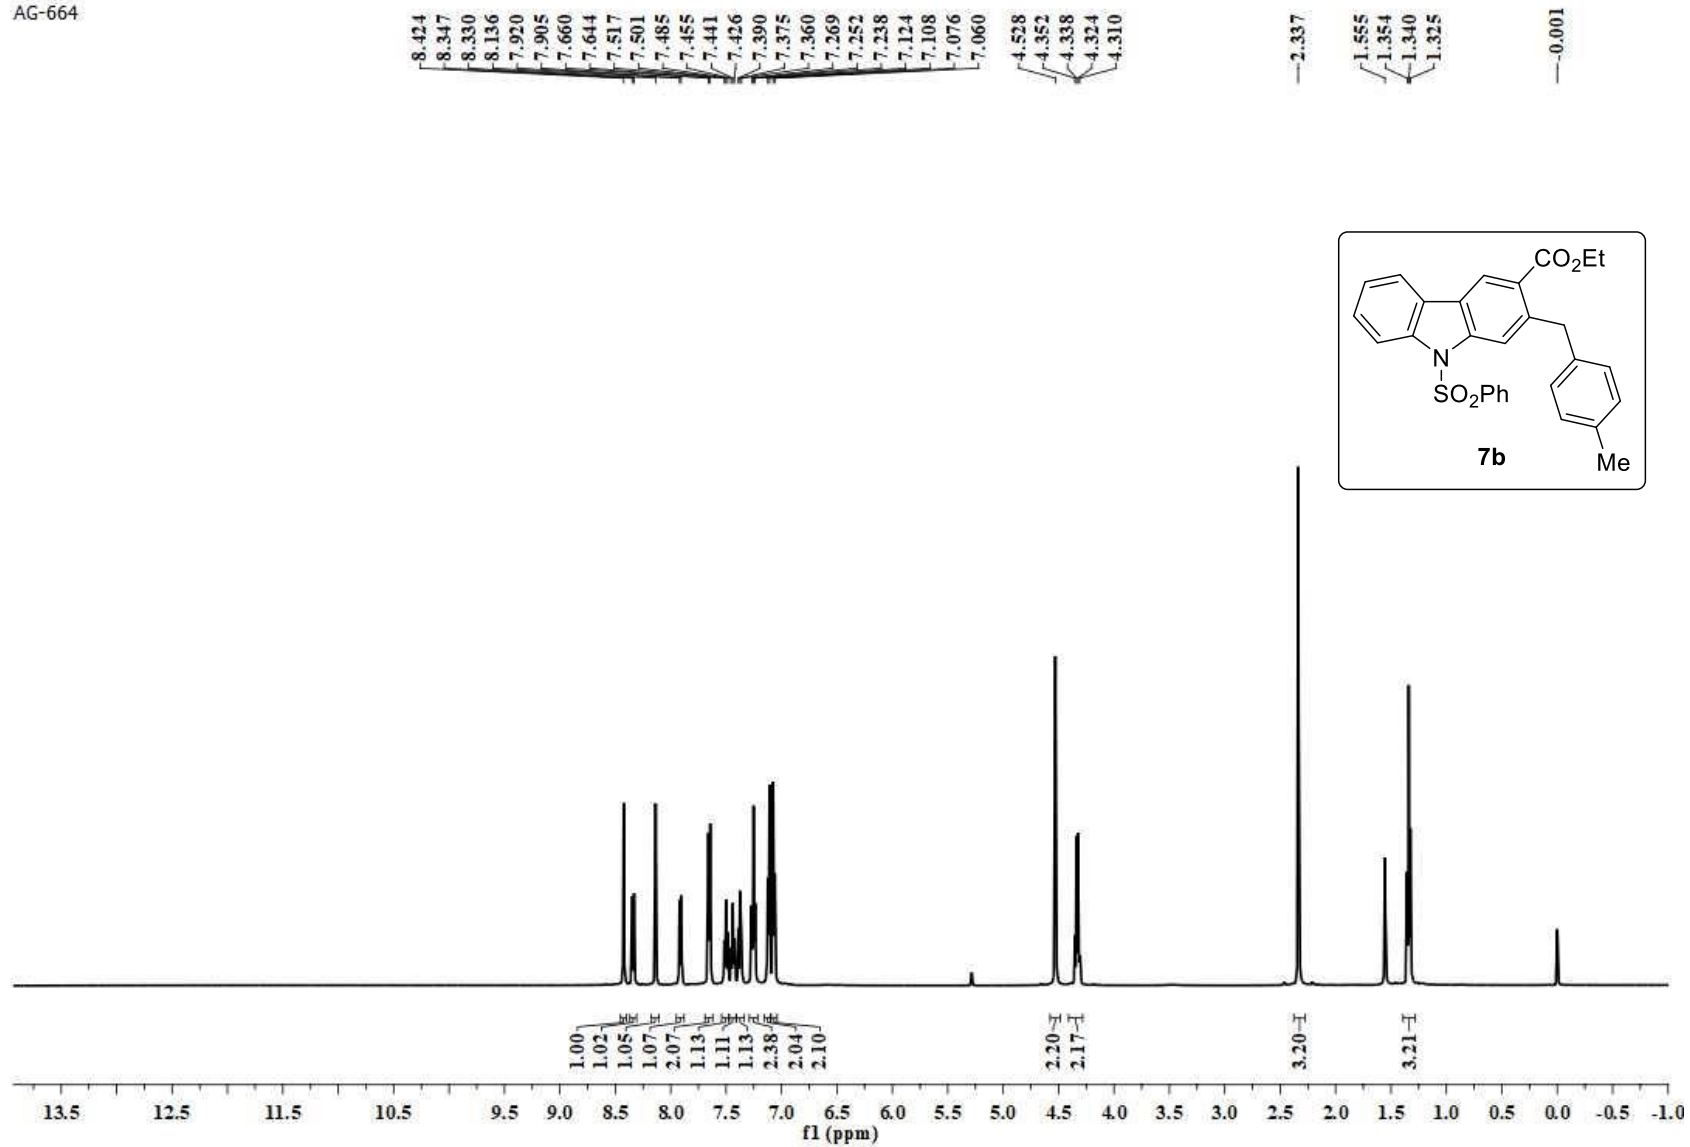

**<sup>1</sup>H NMR (500 MHz, CDCl<sub>3</sub>) spectrum of compound 7b**

AG-664

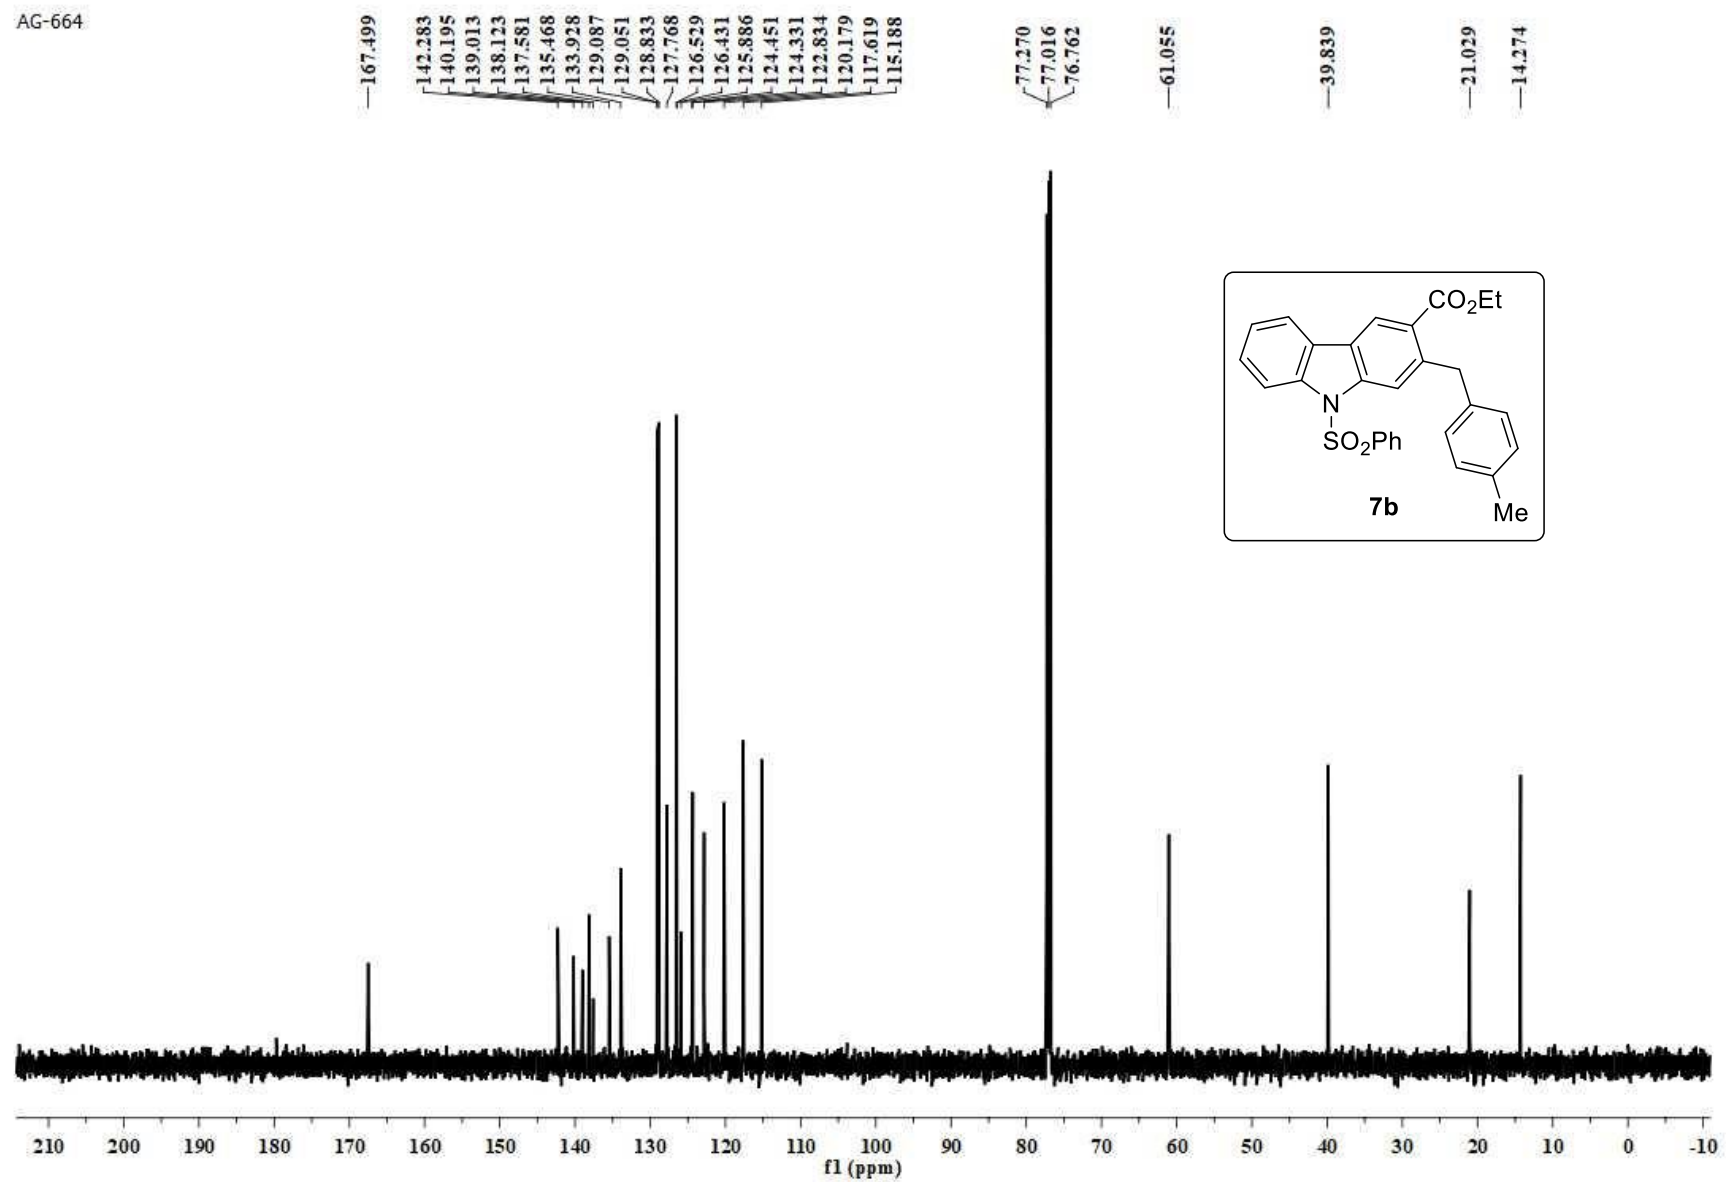

$^{13}\text{C} \{^1\text{H}\}$  NMR (125 MHz,  $\text{CDCl}_3$ ) spectrum of compound **7b**

AG-664

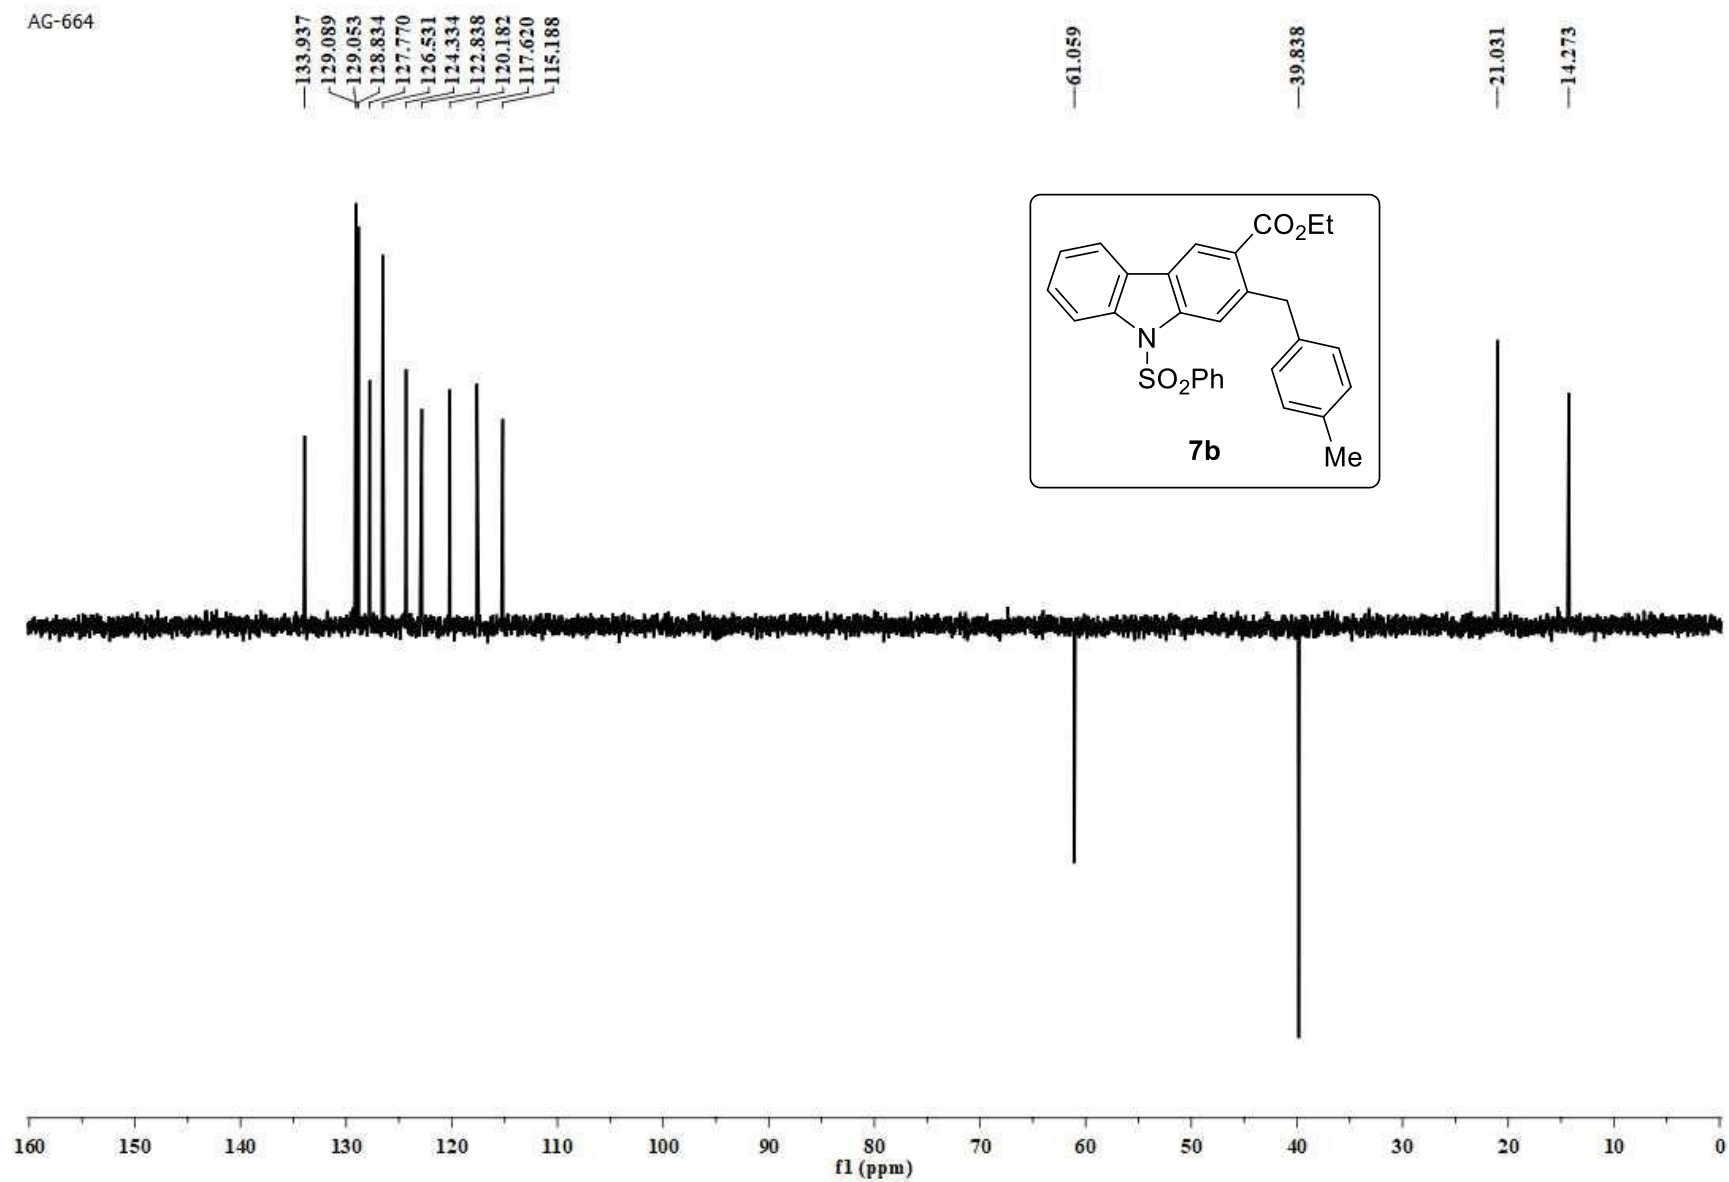

DEPT-135 NMR (125 MHz, CDCl<sub>3</sub>) spectrum of compound **7b**

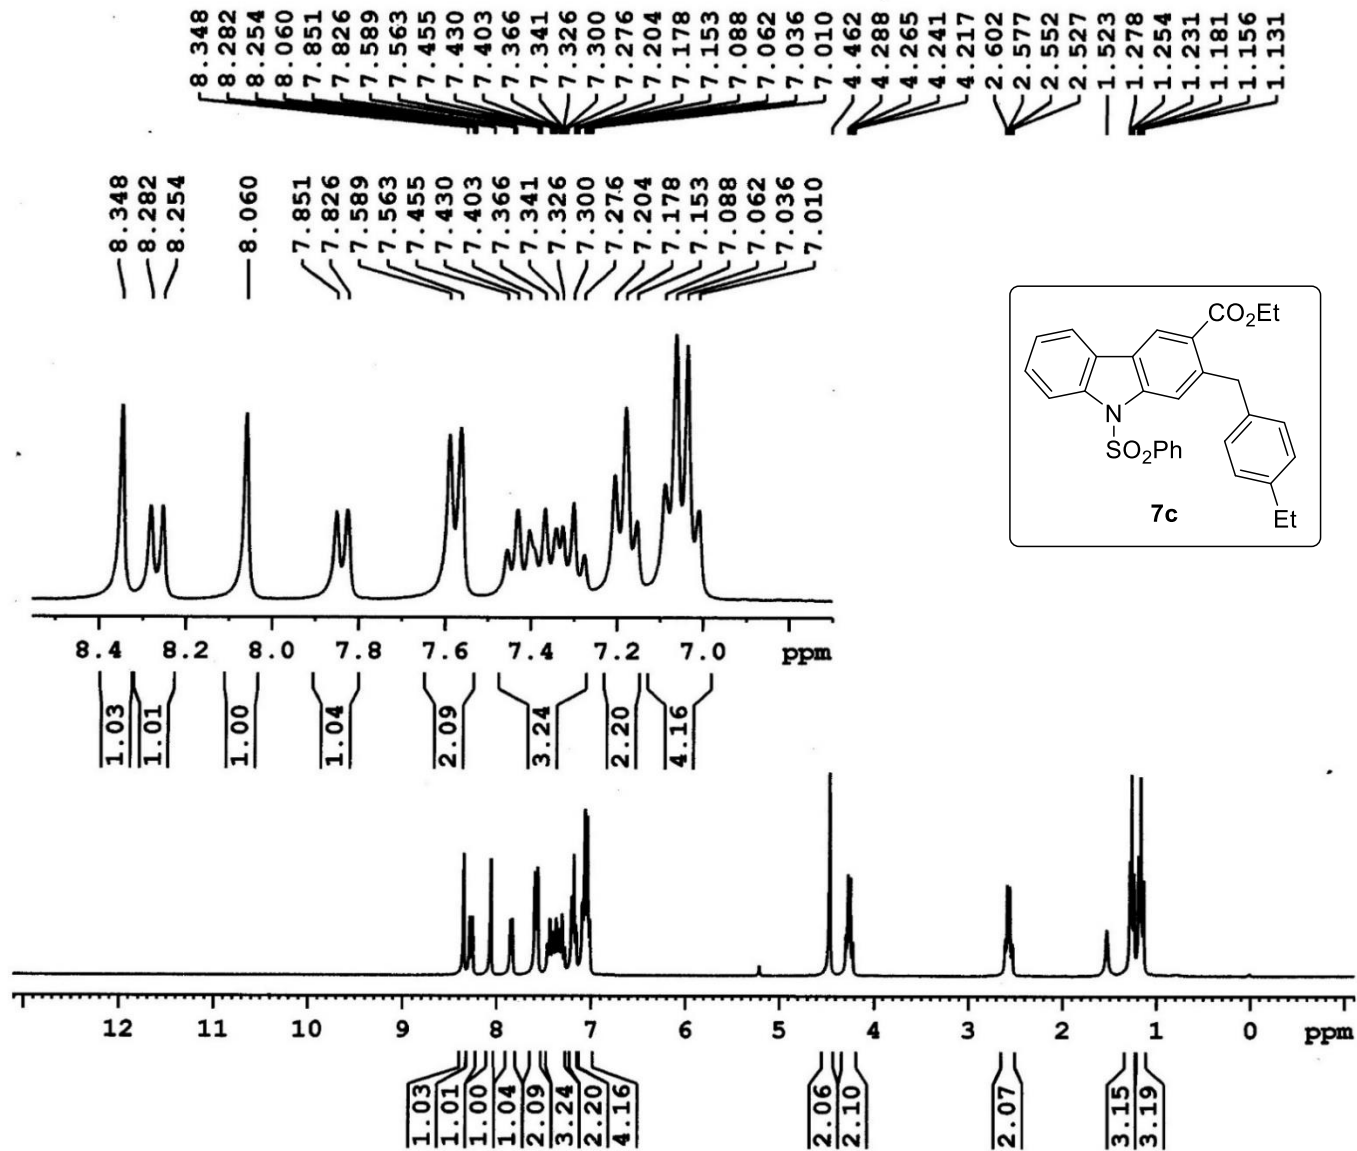

**<sup>1</sup>H NMR (300 MHz, CDCl<sub>3</sub>) spectrum of compound 7c**

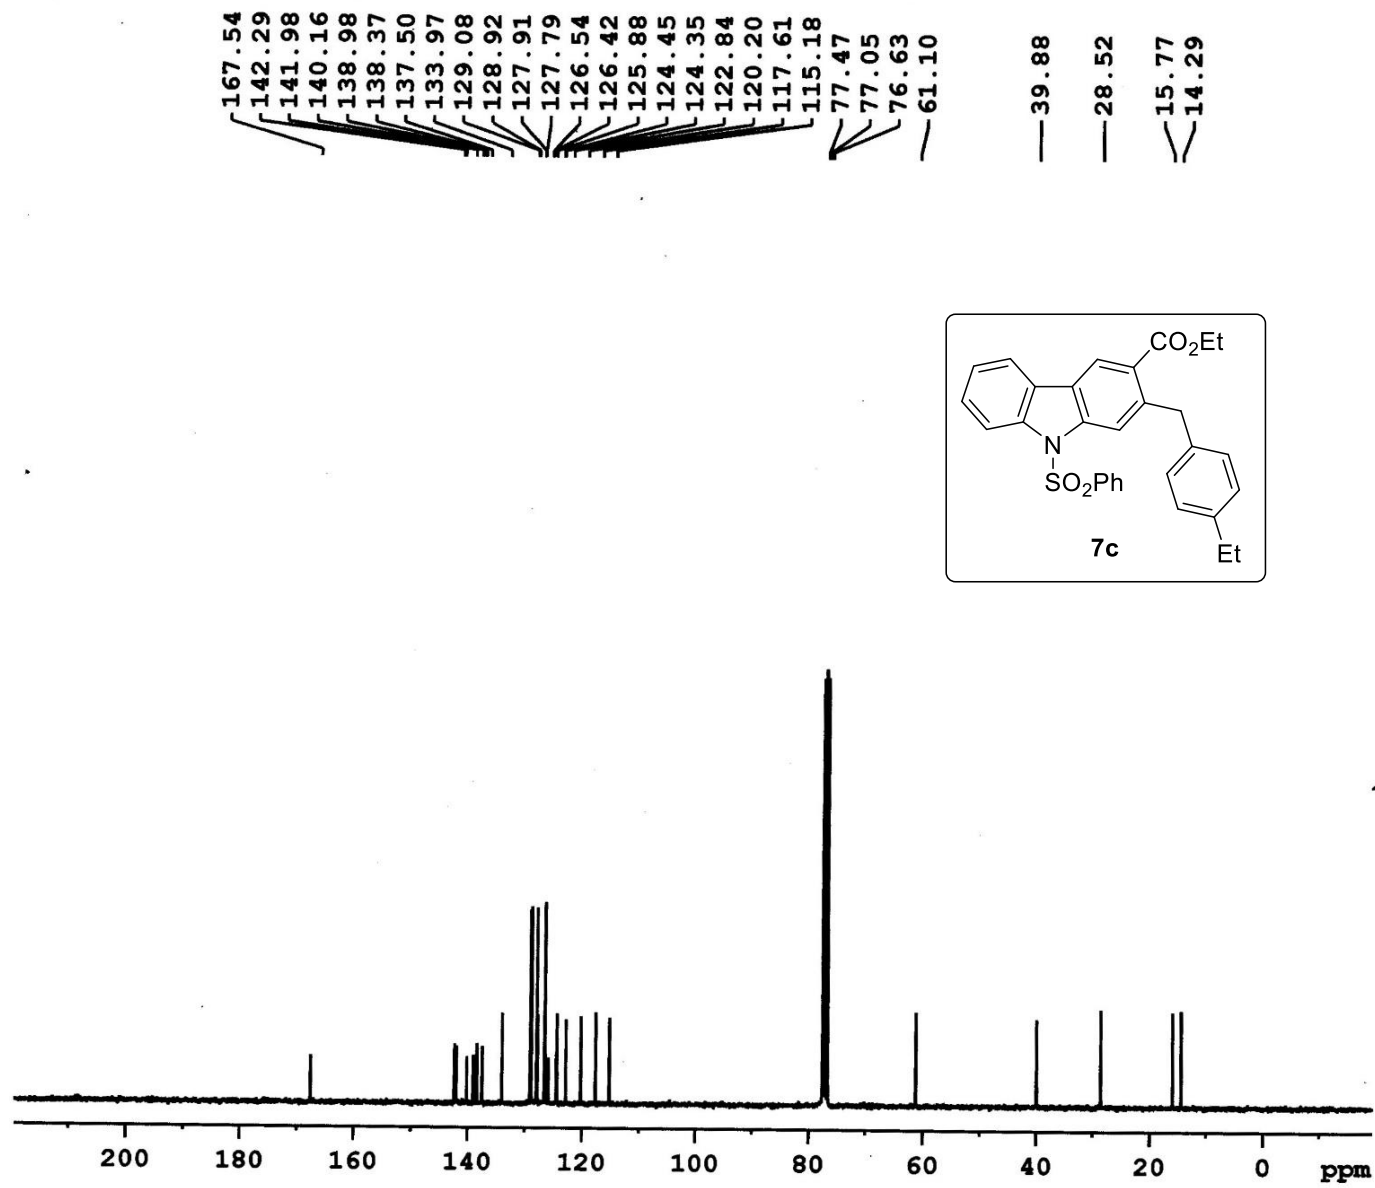

$^{13}\text{C} \{^1\text{H}\}$  NMR (75 MHz,  $\text{CDCl}_3$ ) spectrum of compound **7c**



DRAKM  
AG-V-188 10 (0.384) AM2 (Ar,20000.0,556.28,0.00,LS 10)

1: TOF MS ES+  
4.21e5

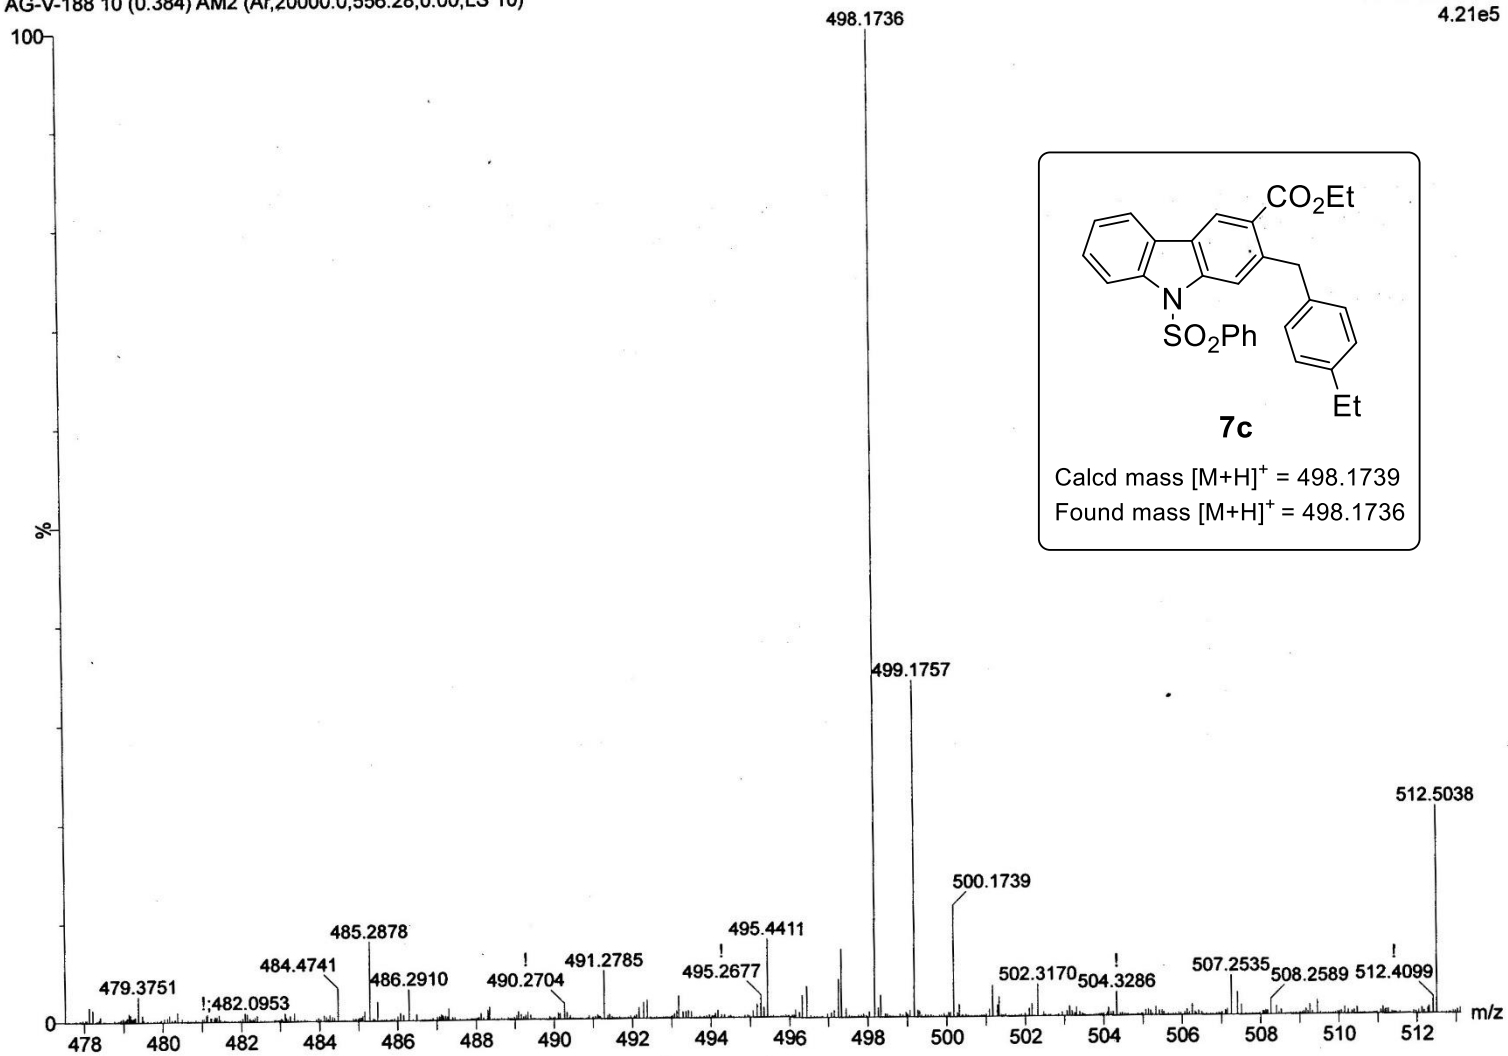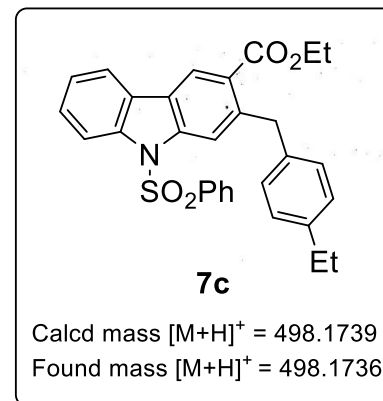

HRMS Spectrum of compound **7c**

AG-667

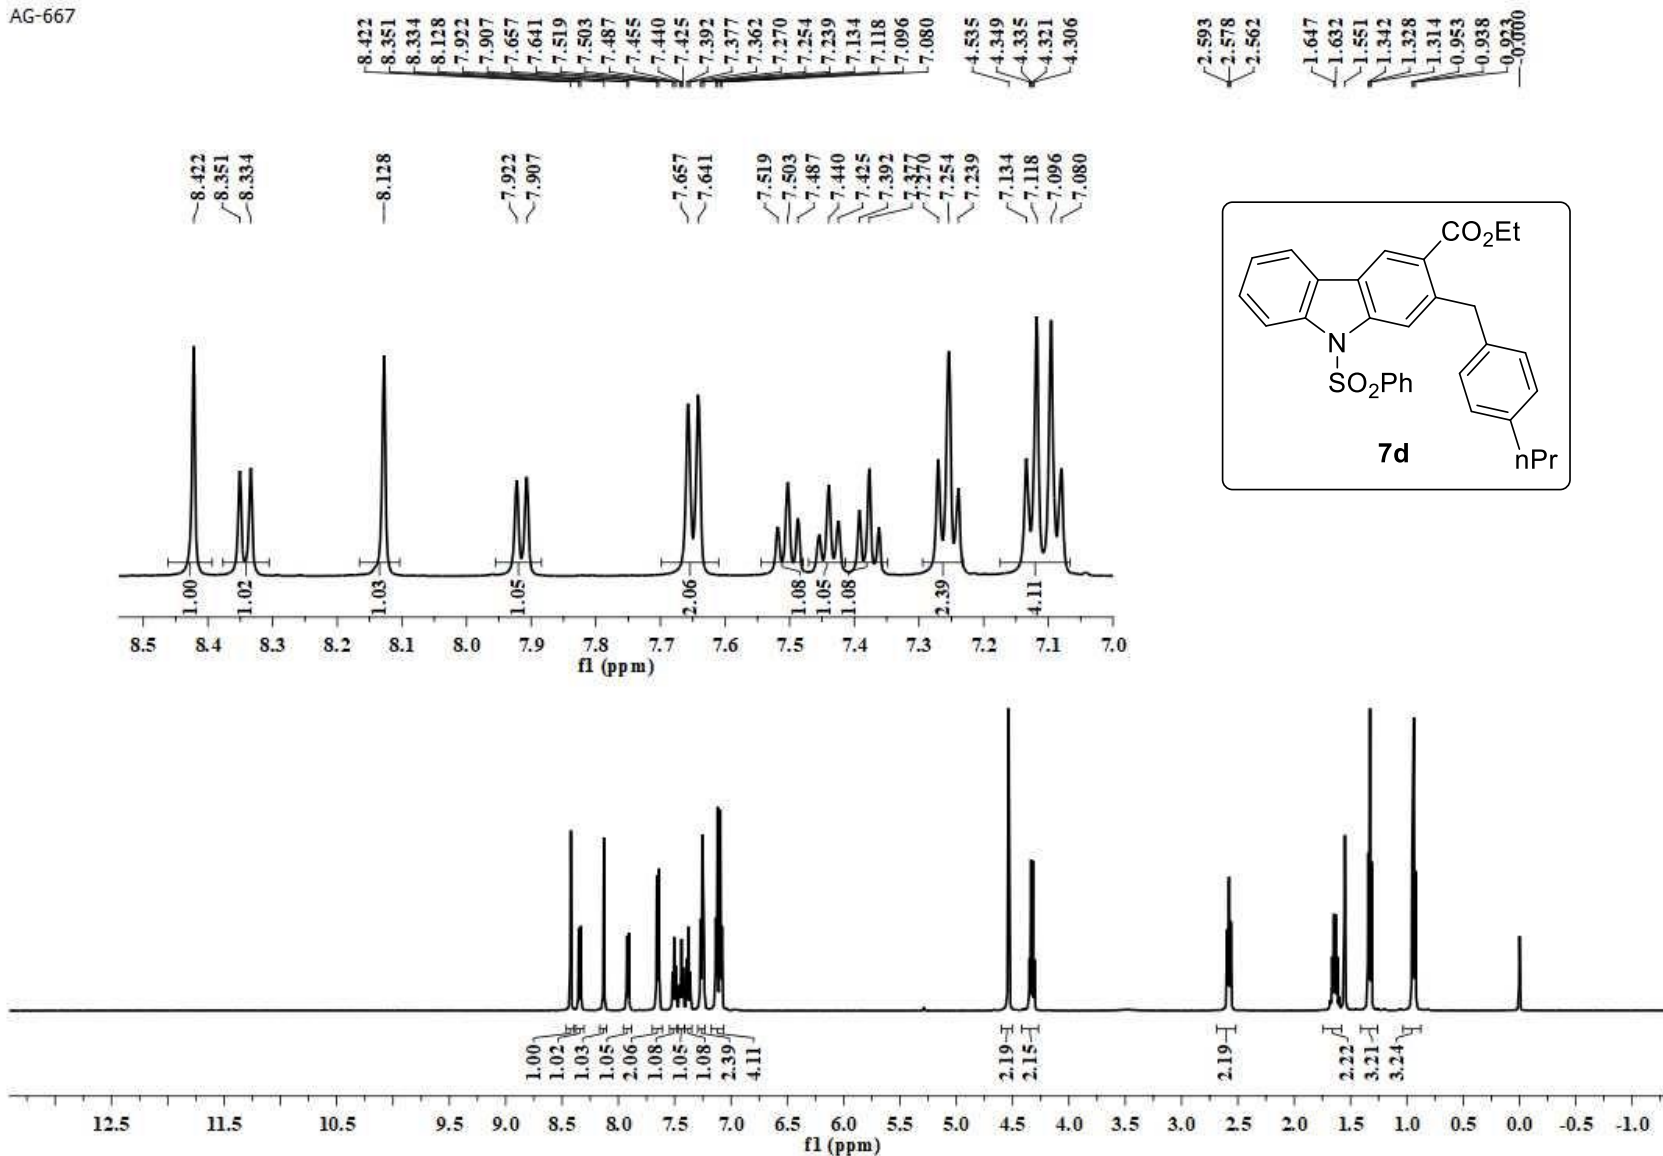

<sup>1</sup>H NMR (500 MHz, CDCl<sub>3</sub>) spectrum of compound **7d**

AG-667

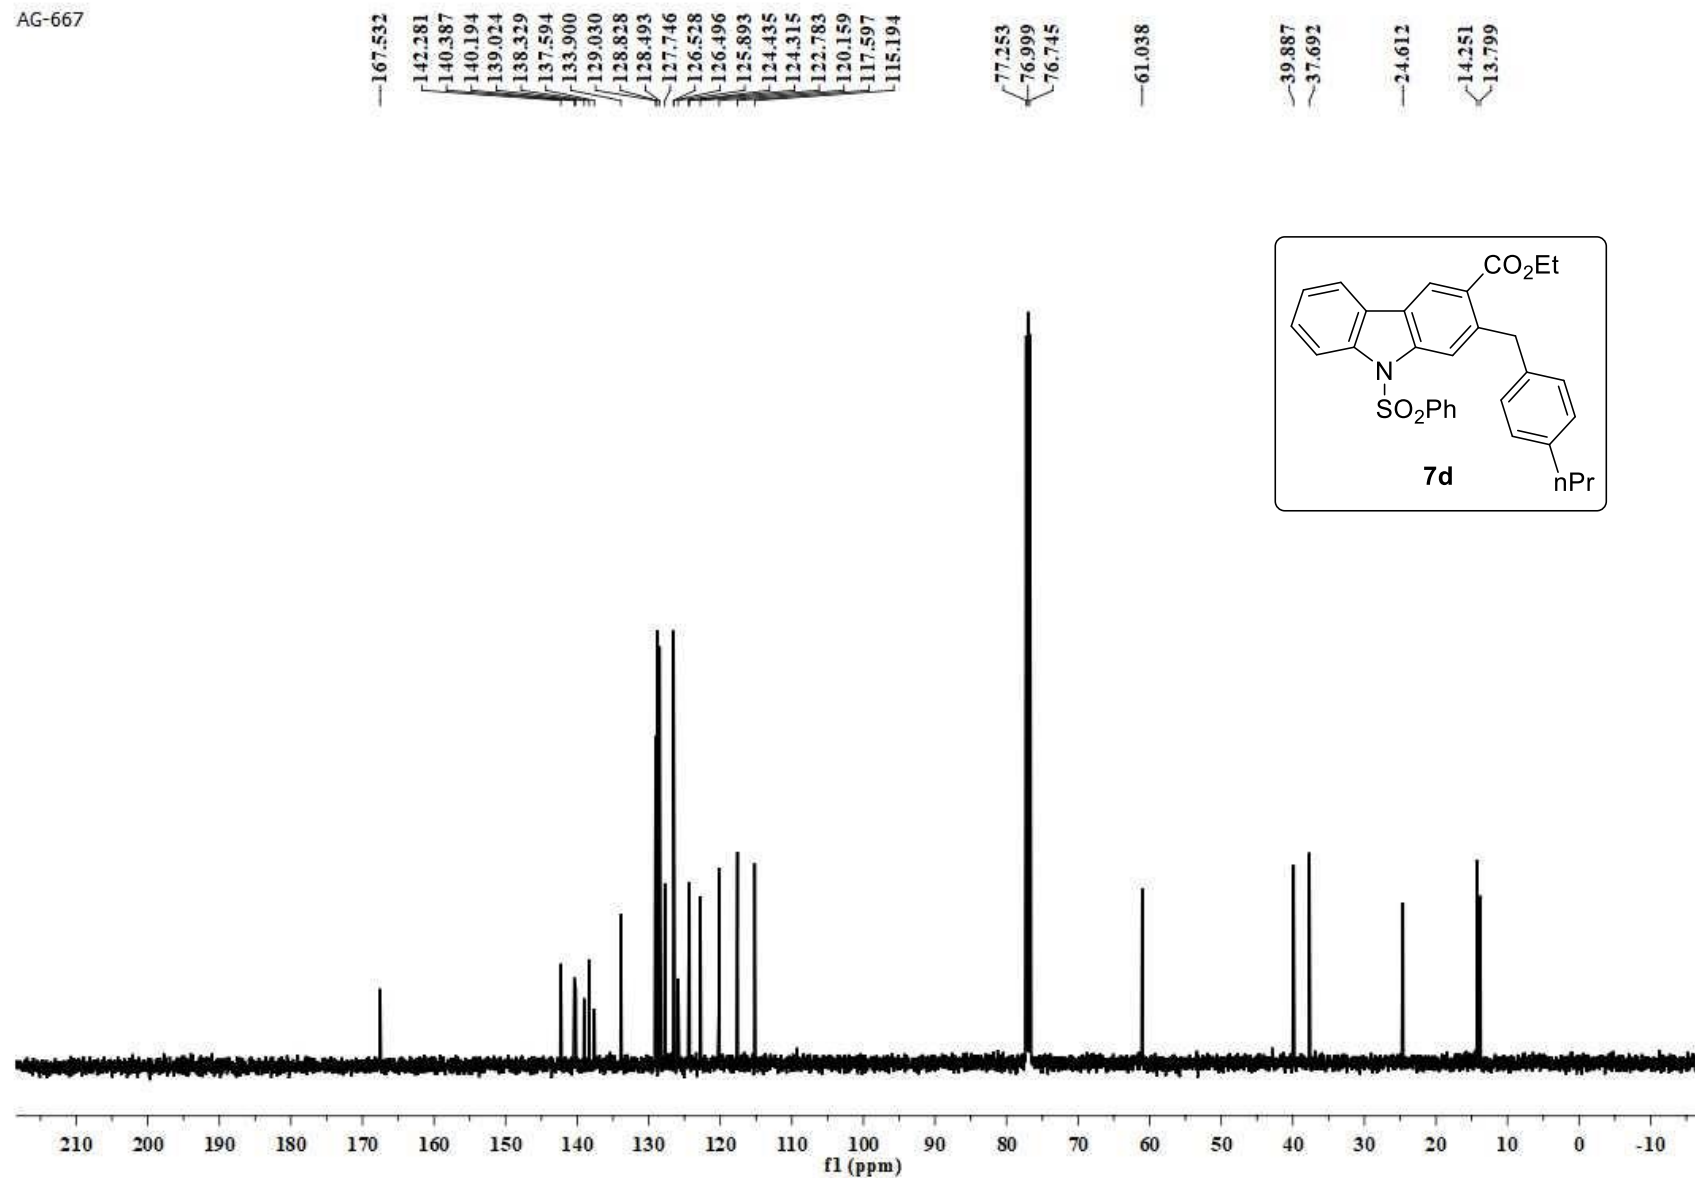

$^{13}\text{C}$   $\{^1\text{H}\}$  NMR (125 MHz,  $\text{CDCl}_3$ ) spectrum of compound 7d

AG-667

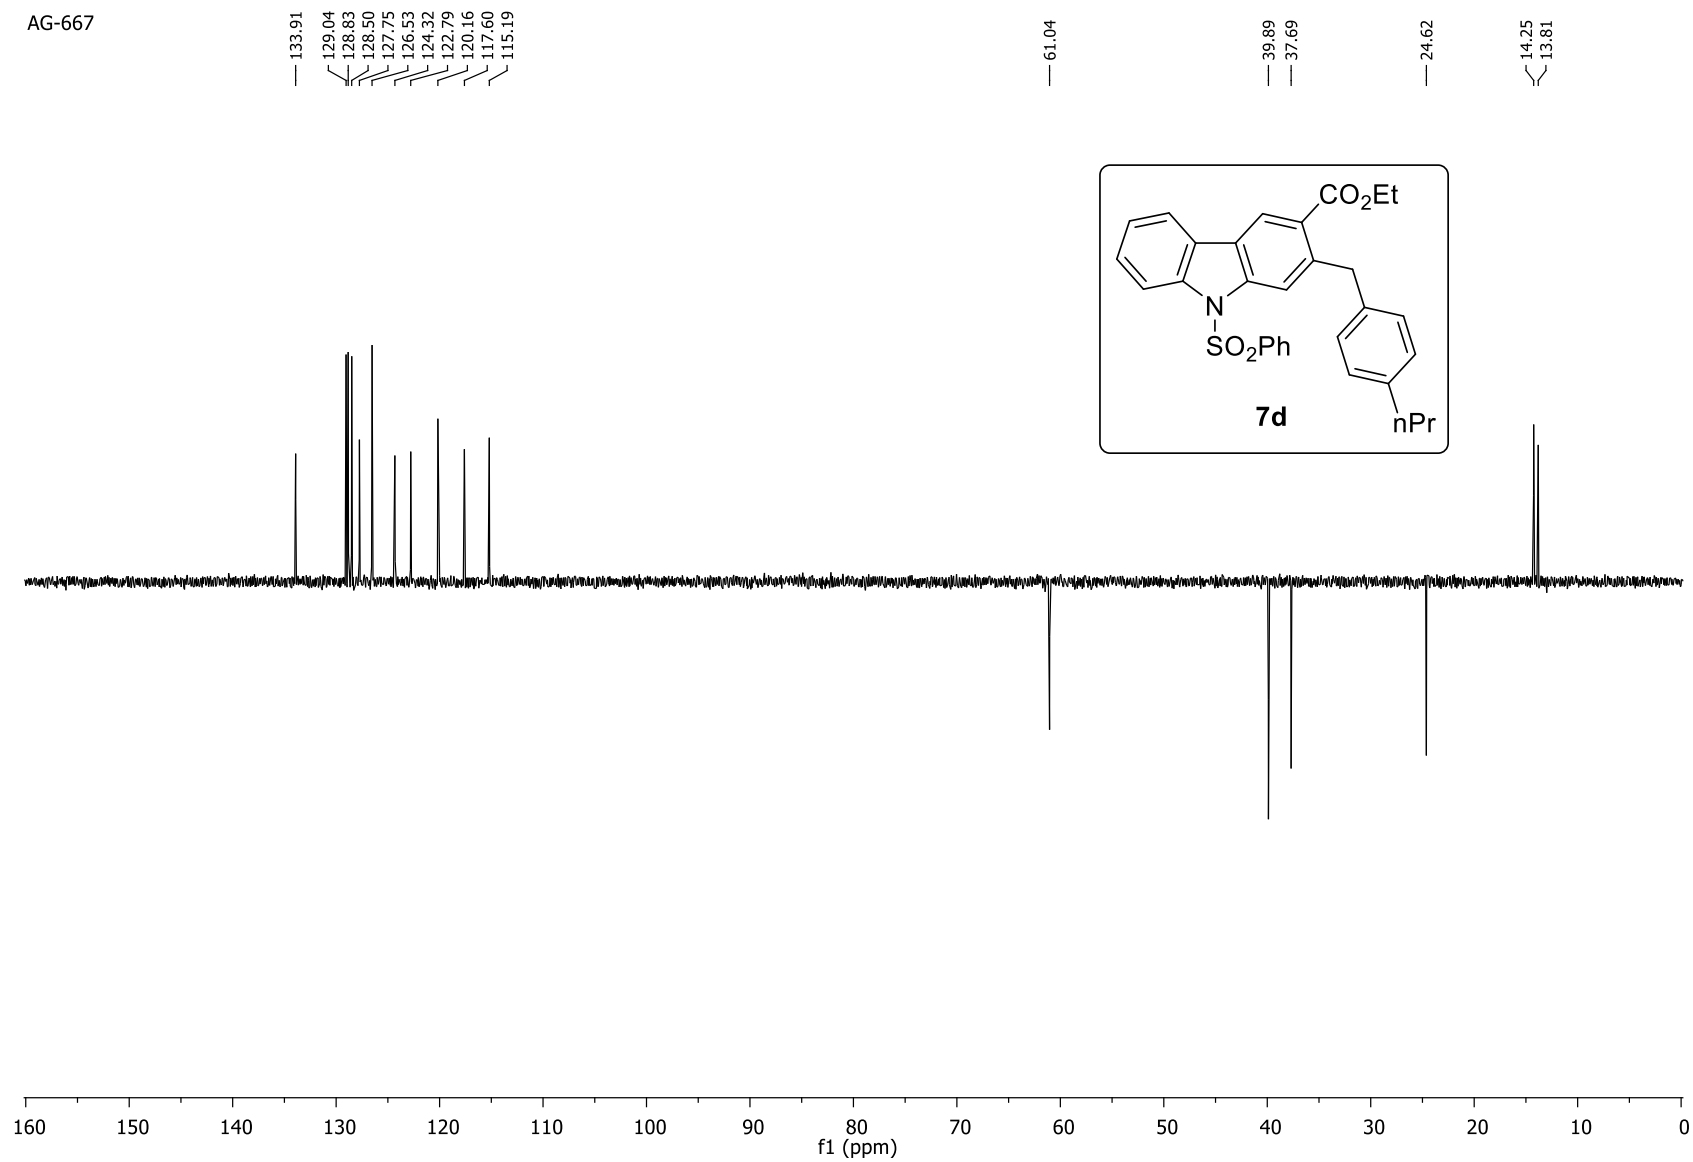

DEPT-135 NMR (125 MHz, CDCl<sub>3</sub>) spectrum of compound **7d**

AG-821

8.422  
8.350  
8.333  
8.130  
7.919  
7.903  
7.658  
7.642  
7.516  
7.501  
7.485  
7.452  
7.438  
7.423  
7.389  
7.374  
7.359  
7.269  
7.253  
7.238  
7.135  
7.120  
7.096  
7.080

4.534  
4.348  
4.334  
4.320  
4.306

2.615  
2.599  
2.584  
1.608  
1.594  
1.580  
1.360  
1.342  
1.327  
0.912  
0.907  
0.893

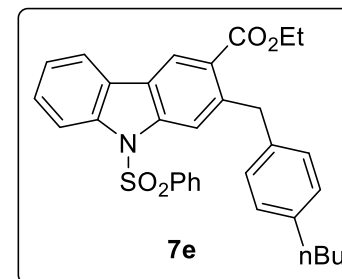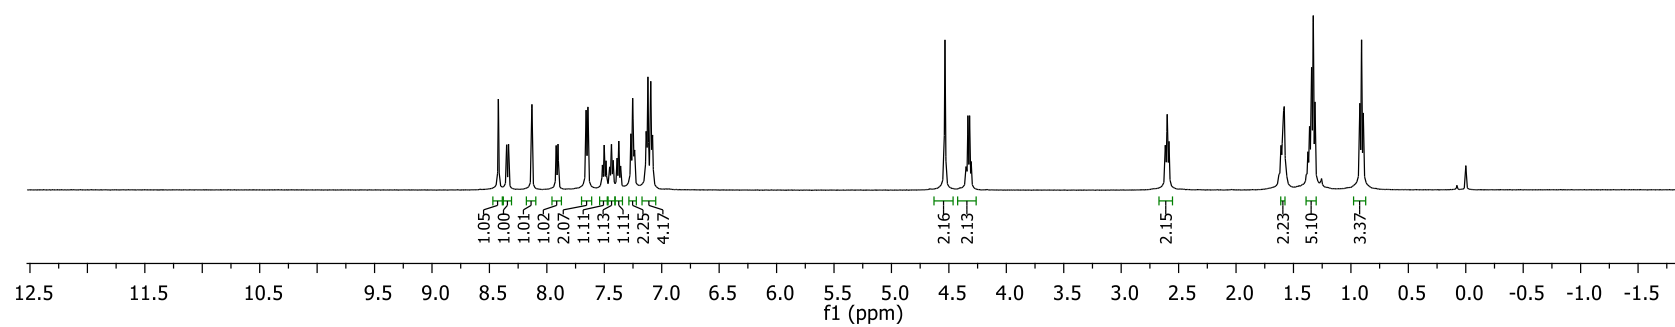

<sup>1</sup>H NMR (500 MHz, CDCl<sub>3</sub>) spectrum of compound **7e**

AG-821

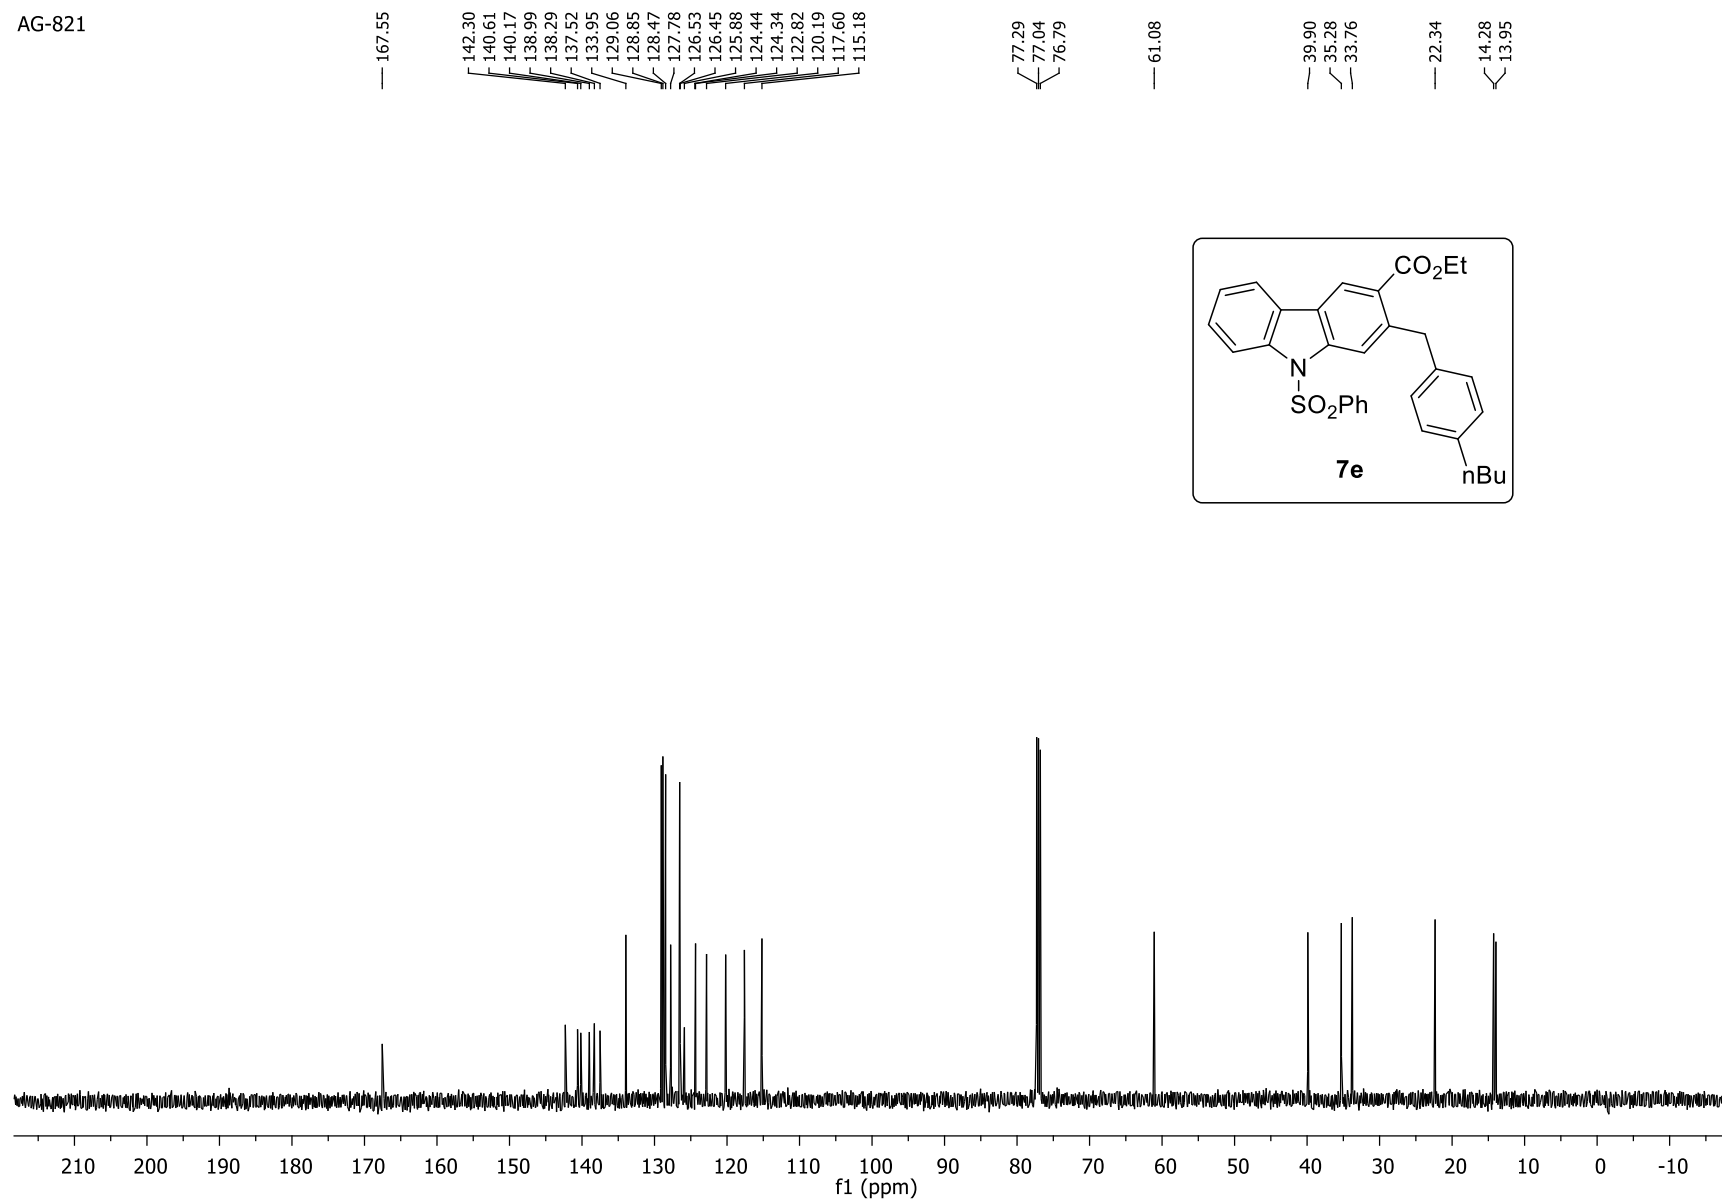

$^{13}\text{C} \{^1\text{H}\}$  NMR (125 MHz,  $\text{CDCl}_3$ ) spectrum of compound **7e**

AG-821

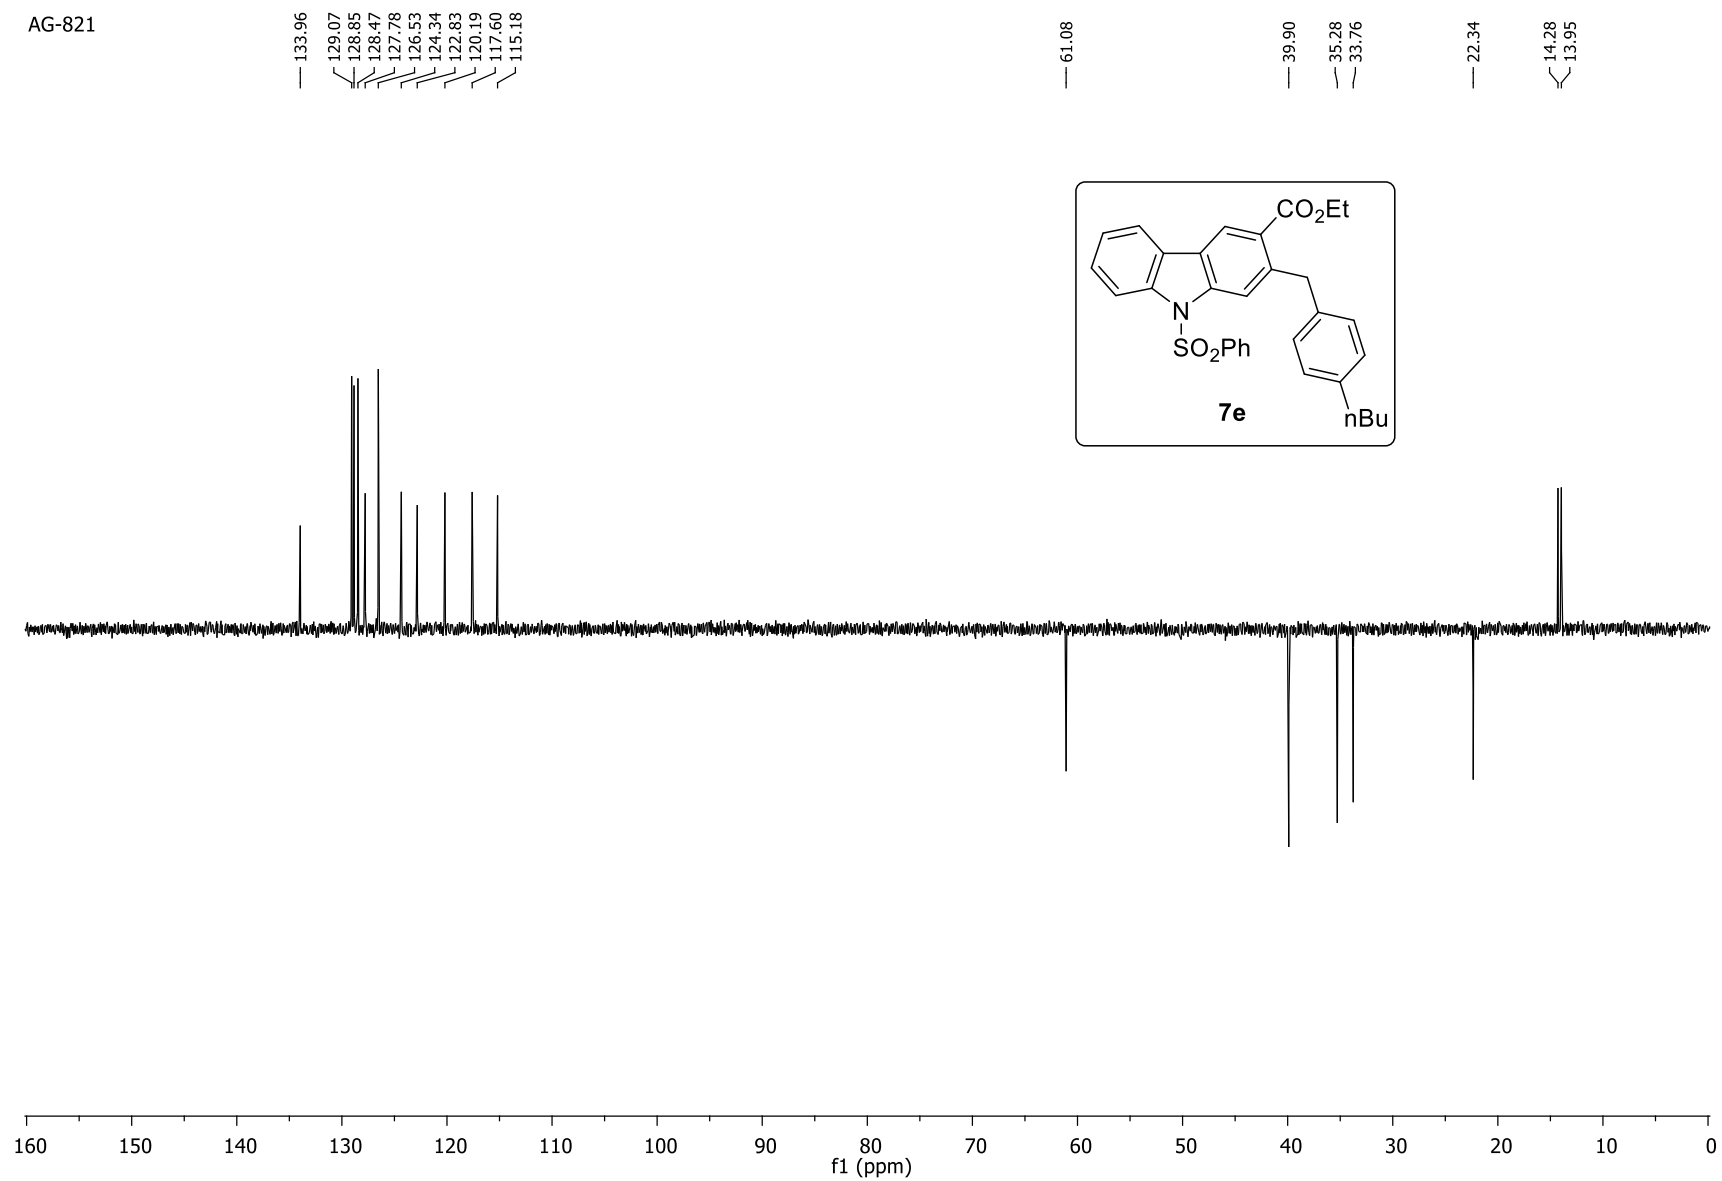

DEPT-135 NMR (125 MHz,  $\text{CDCl}_3$ ) spectrum of compound **7e**

AG-IV150

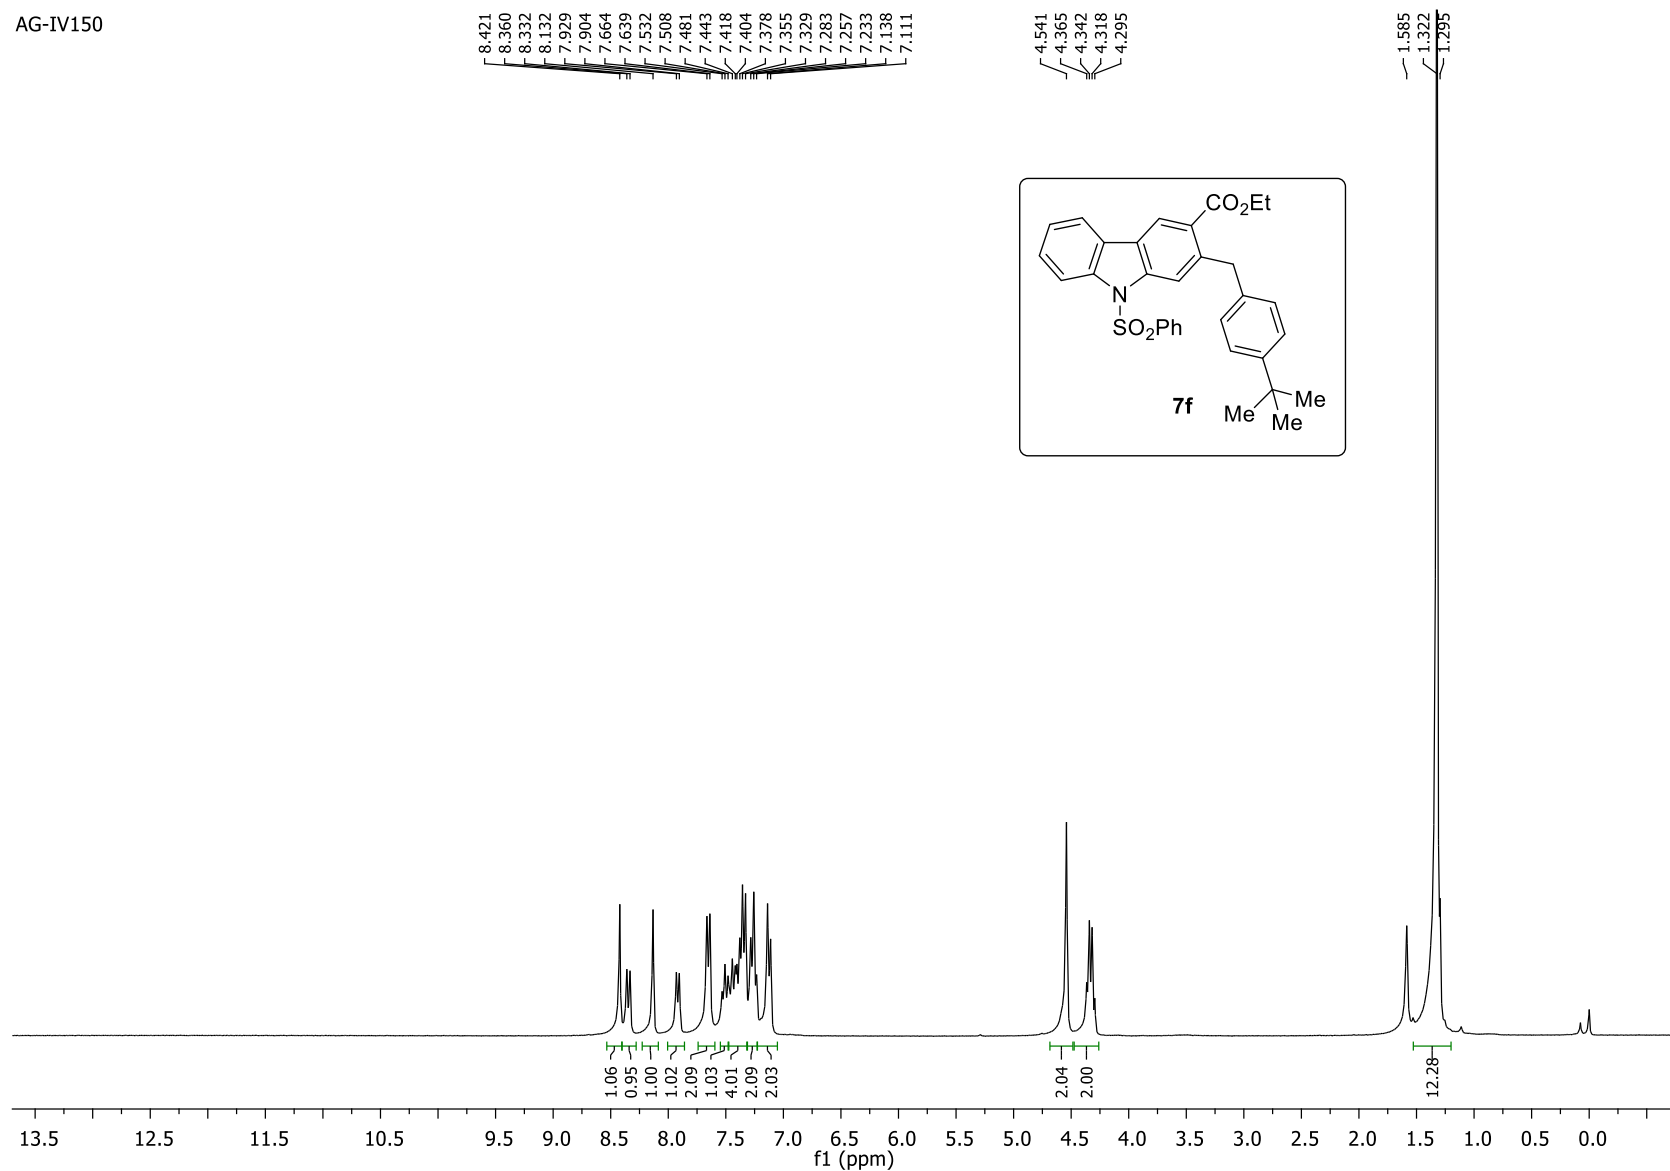

$^1\text{H}$  NMR (300 MHz,  $\text{CDCl}_3$ ) spectrum of compound **7f**



AG-IV150

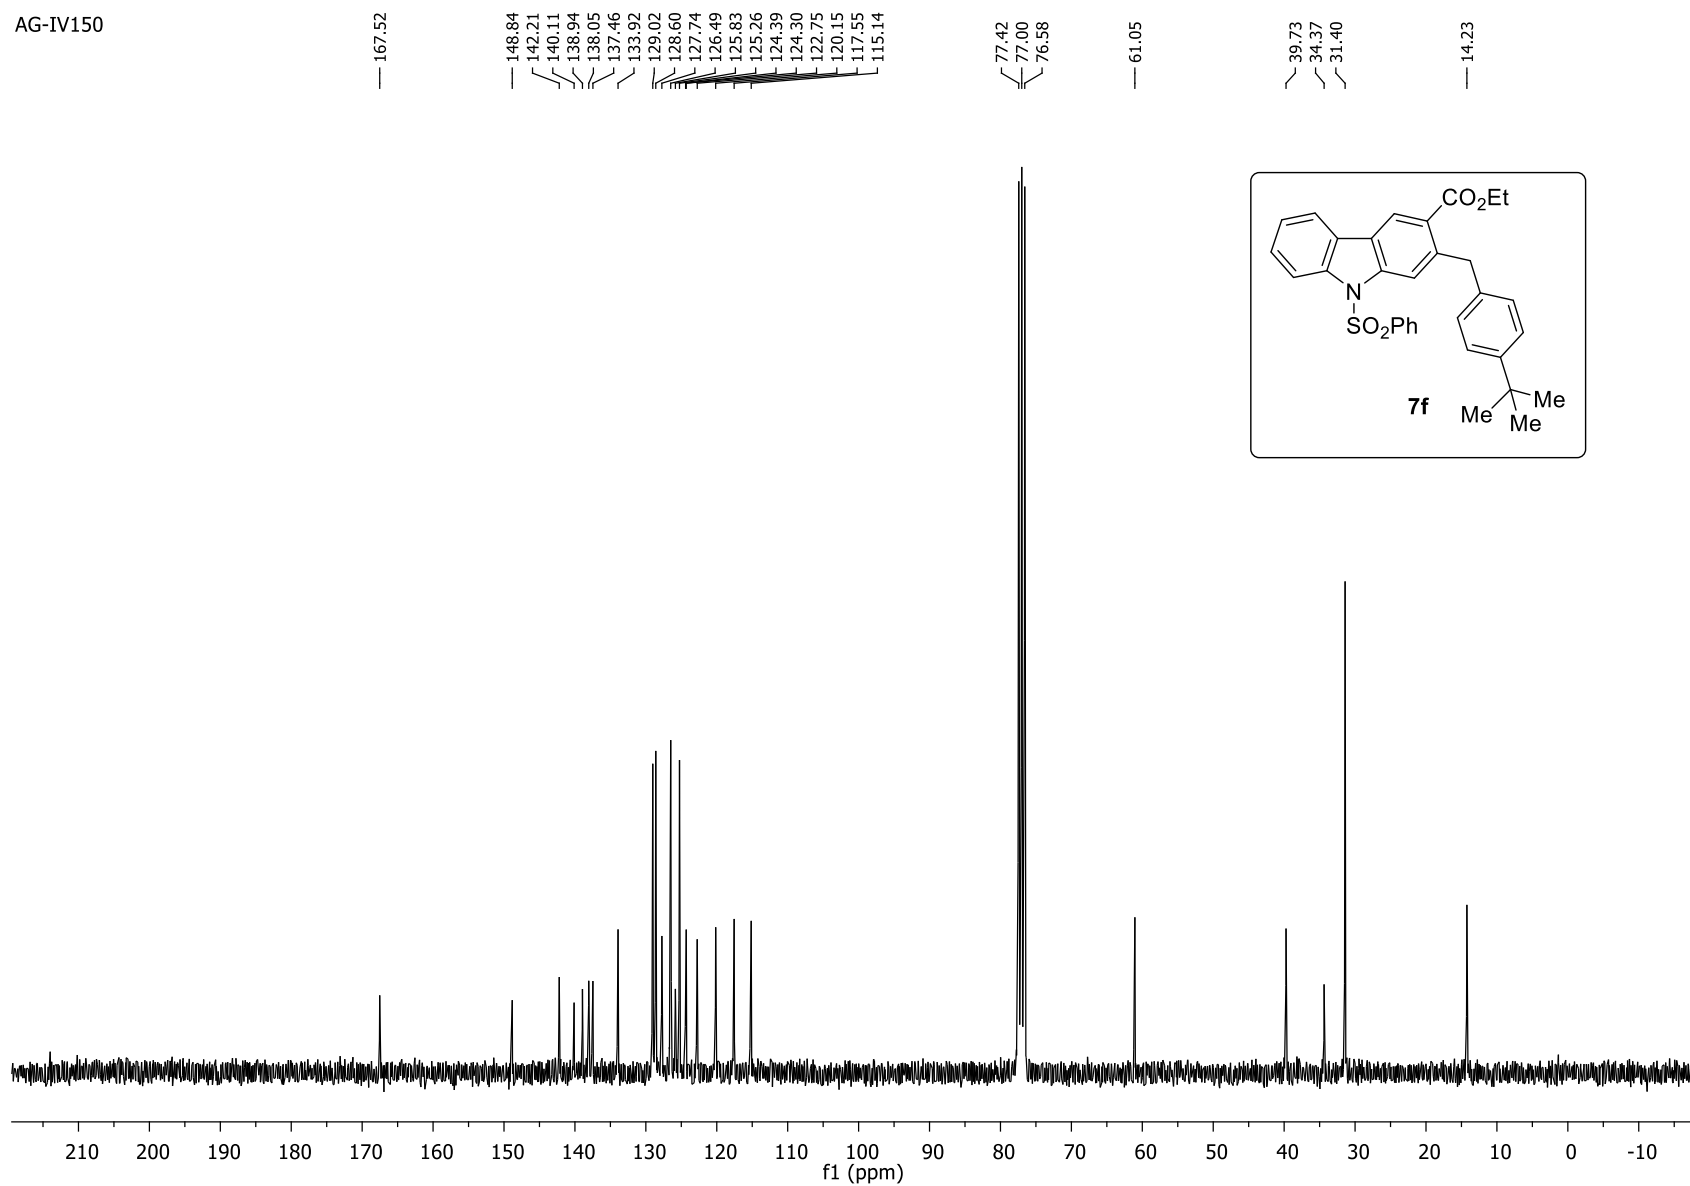

$^{13}\text{C} \{^1\text{H}\}$  NMR (75 MHz,  $\text{CDCl}_3$ ) spectrum of compound **7f**

AG-IV150

133.97  
129.07  
128.65  
127.79  
126.54  
125.30  
124.35  
122.80  
120.20  
117.60  
115.18

61.10

39.78

31.45

14.28

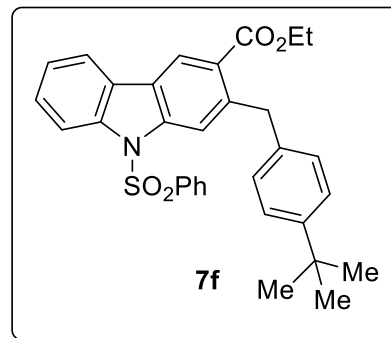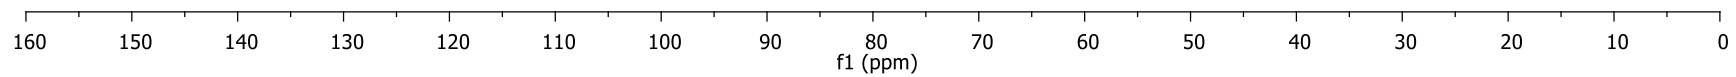

DEPT-135 NMR (75 MHz,  $\text{CDCl}_3$ ) spectrum of compound **7f**

AG-666

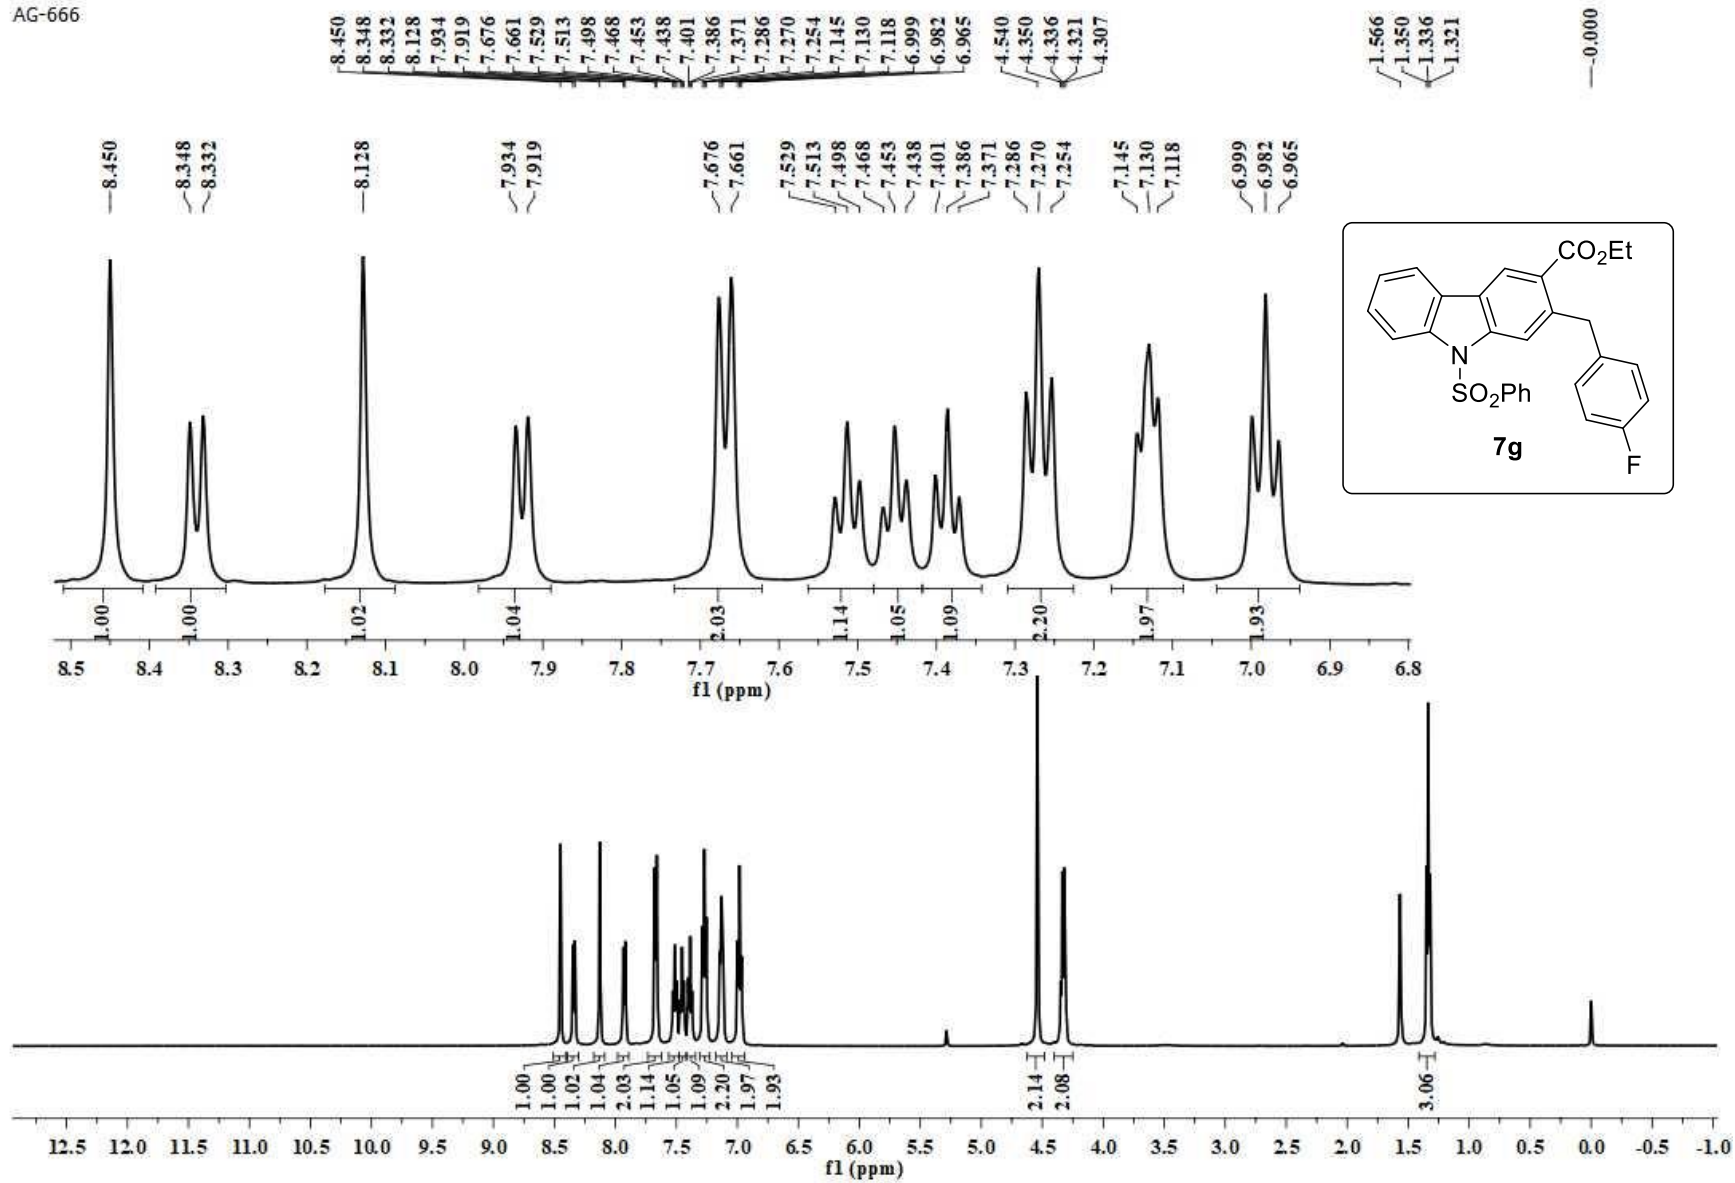

**<sup>1</sup>H NMR (500 MHz, CDCl<sub>3</sub>) spectrum of compound 7g**

AG-666

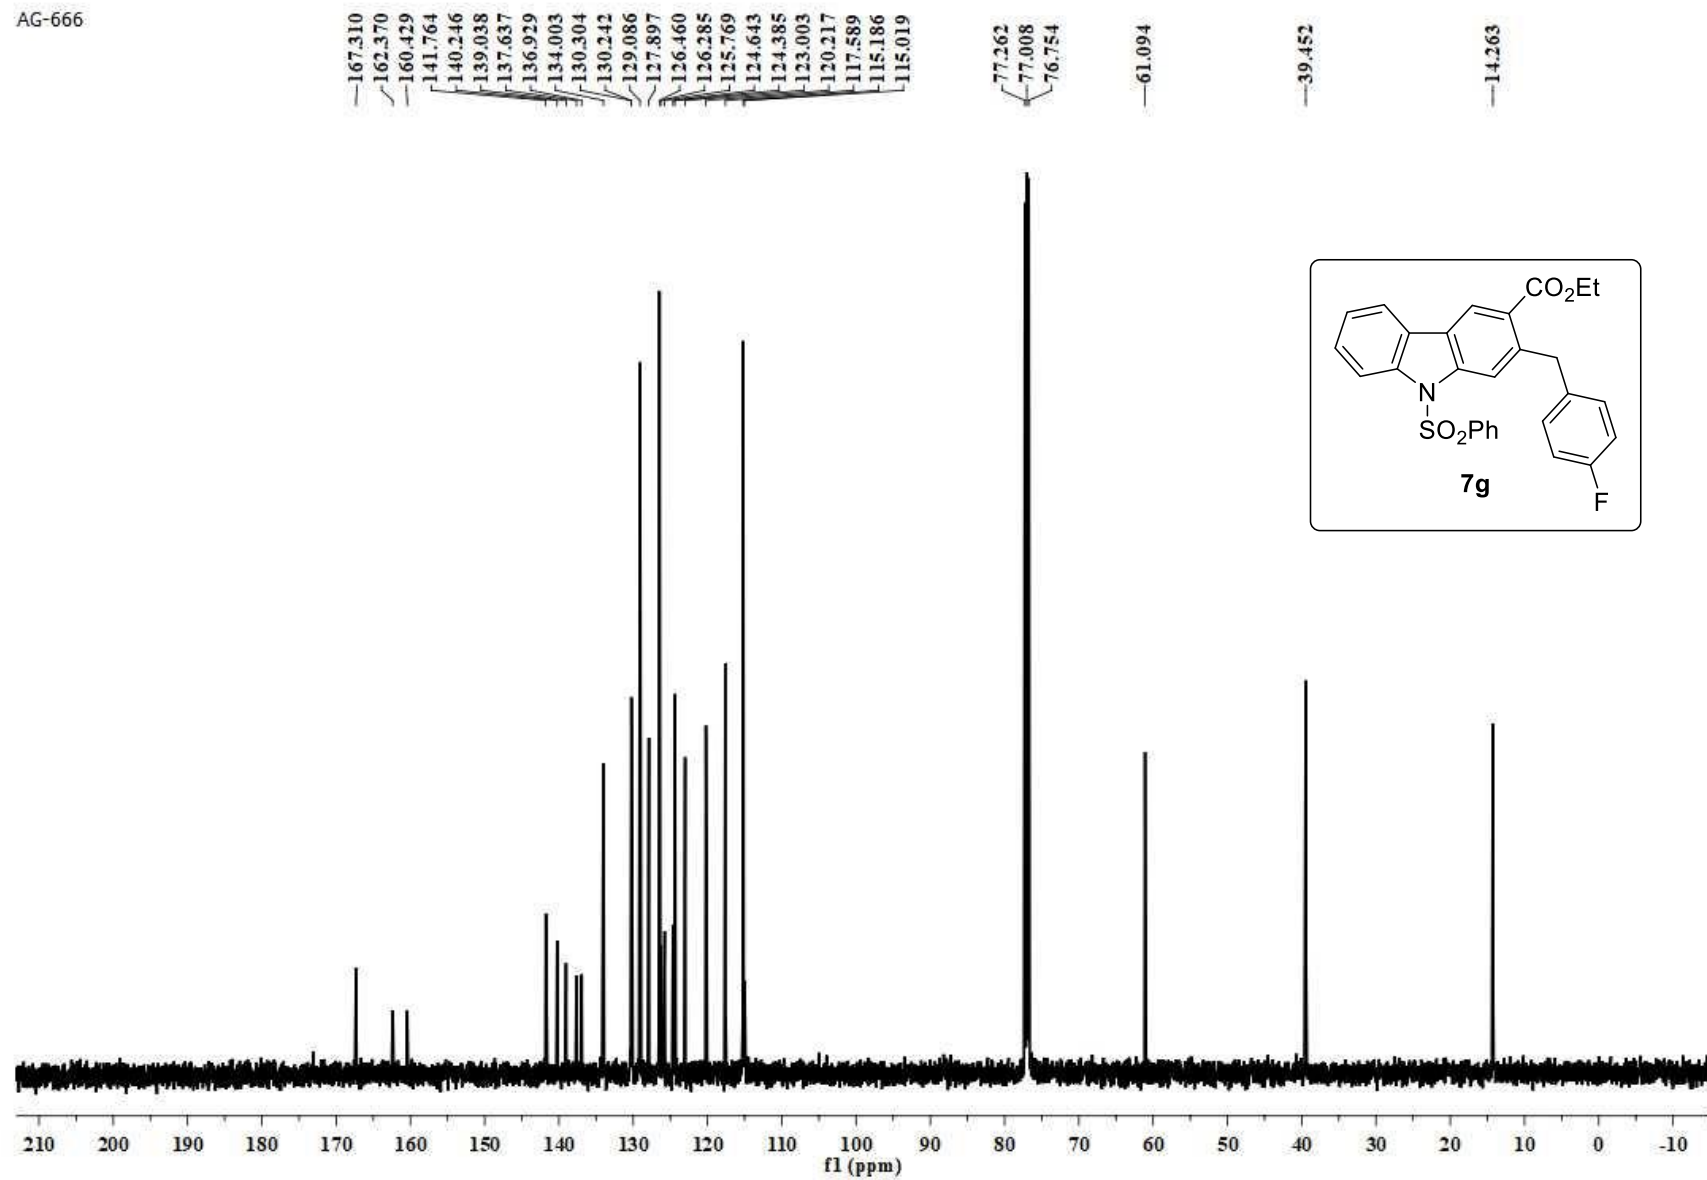

$^{13}\text{C} \{^1\text{H}\}$  NMR (125 MHz,  $\text{CDCl}_3$ ) spectrum of compound **7g**

AG-666

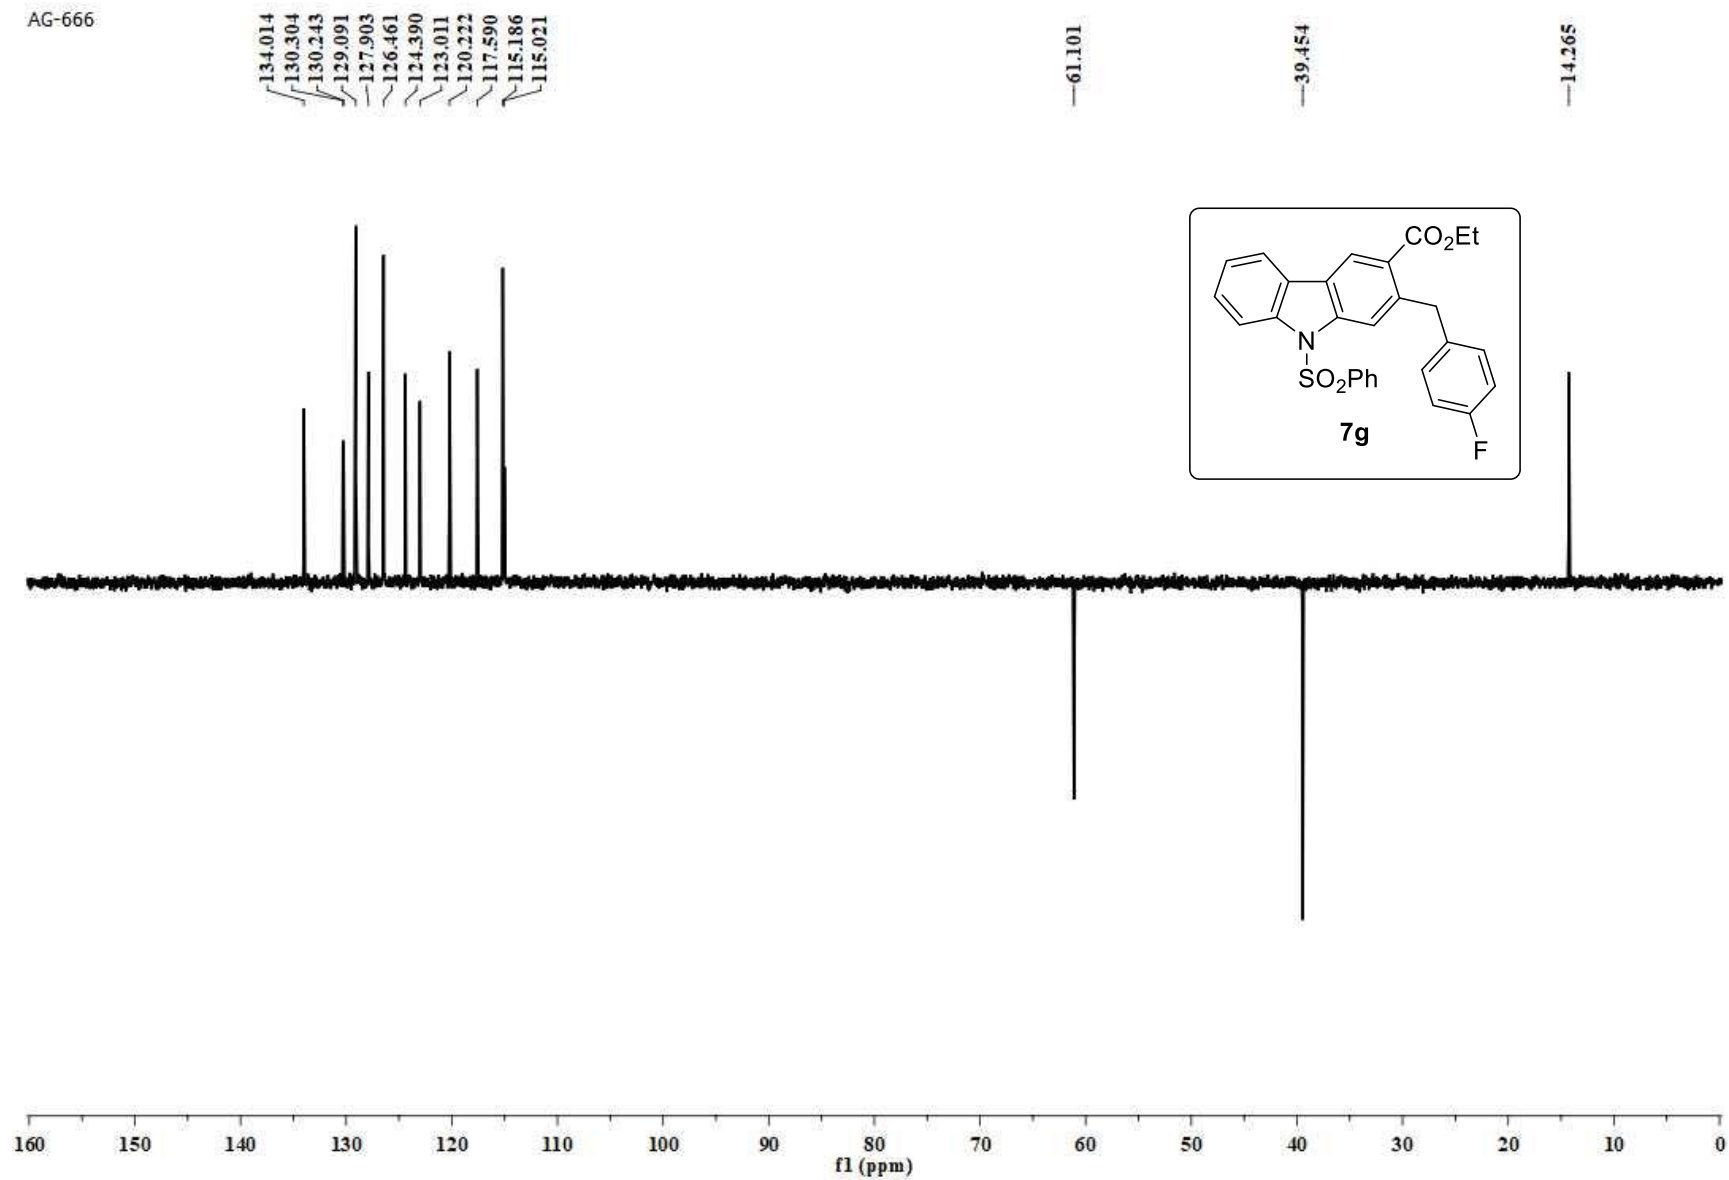

DEPT-135 NMR (125 MHz, CDCl<sub>3</sub>) spectrum of compound **7g**

DRAKM  
AG-666-R 3 (0.127) AM2 (Ar,20000.0,556.28,0.00,LS 10)

1: TOF MS ES+  
1.94e5

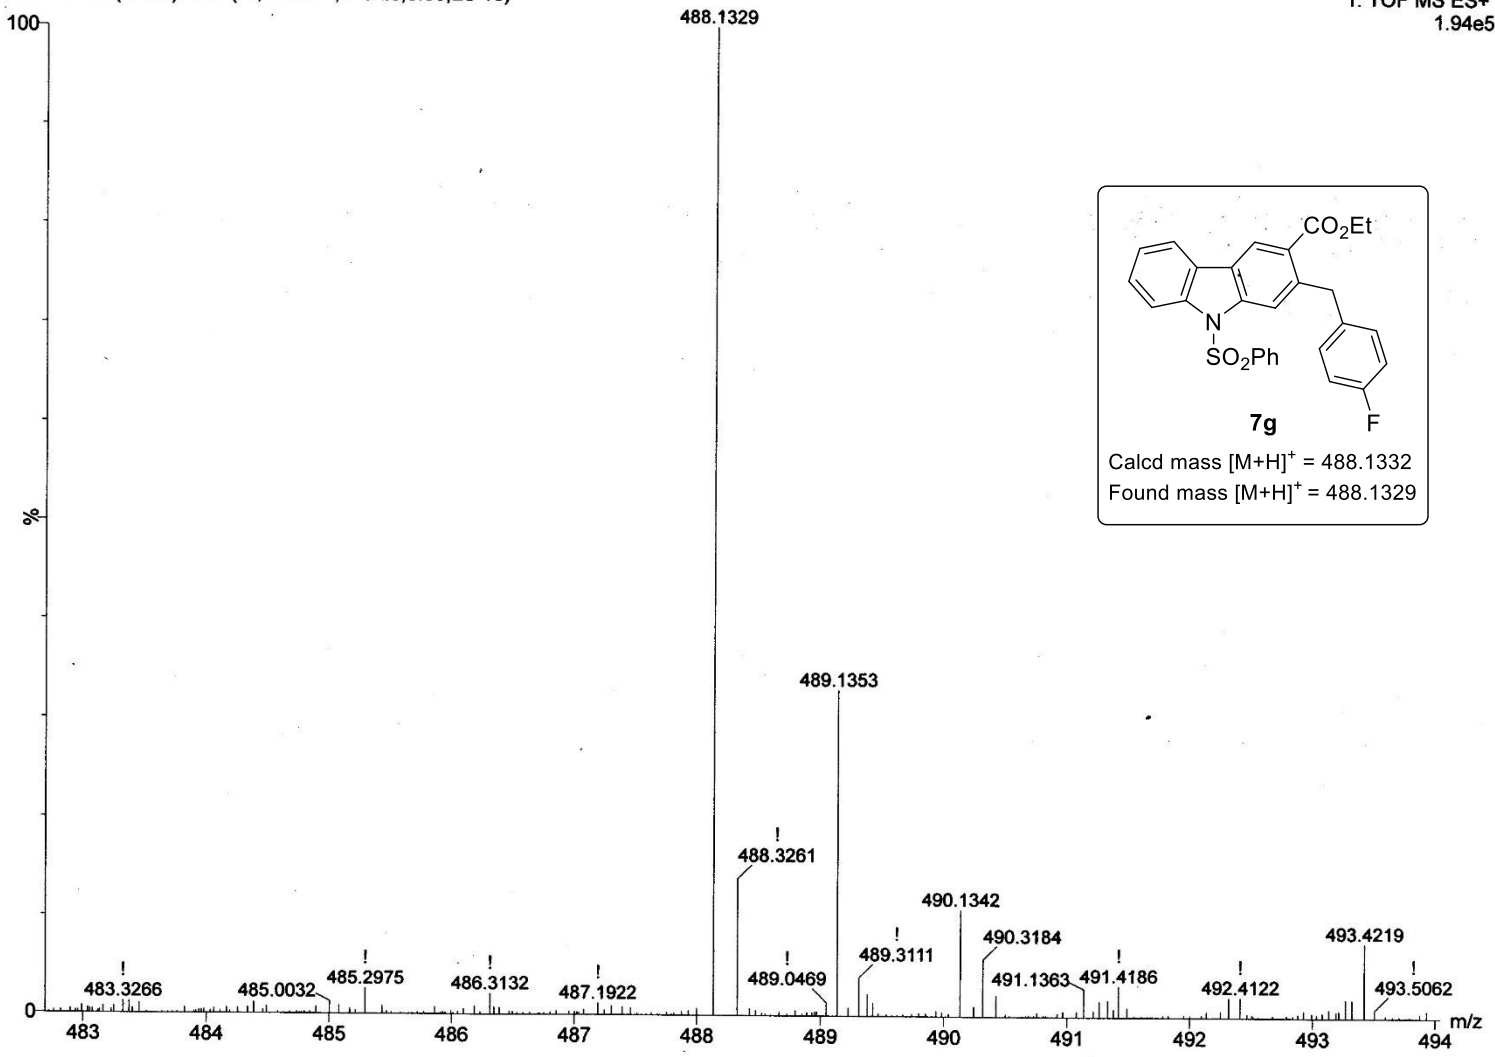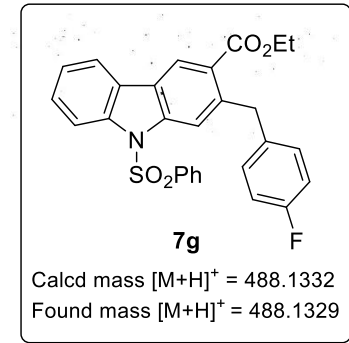

HRMS Spectrum of compound 7g

AG-825

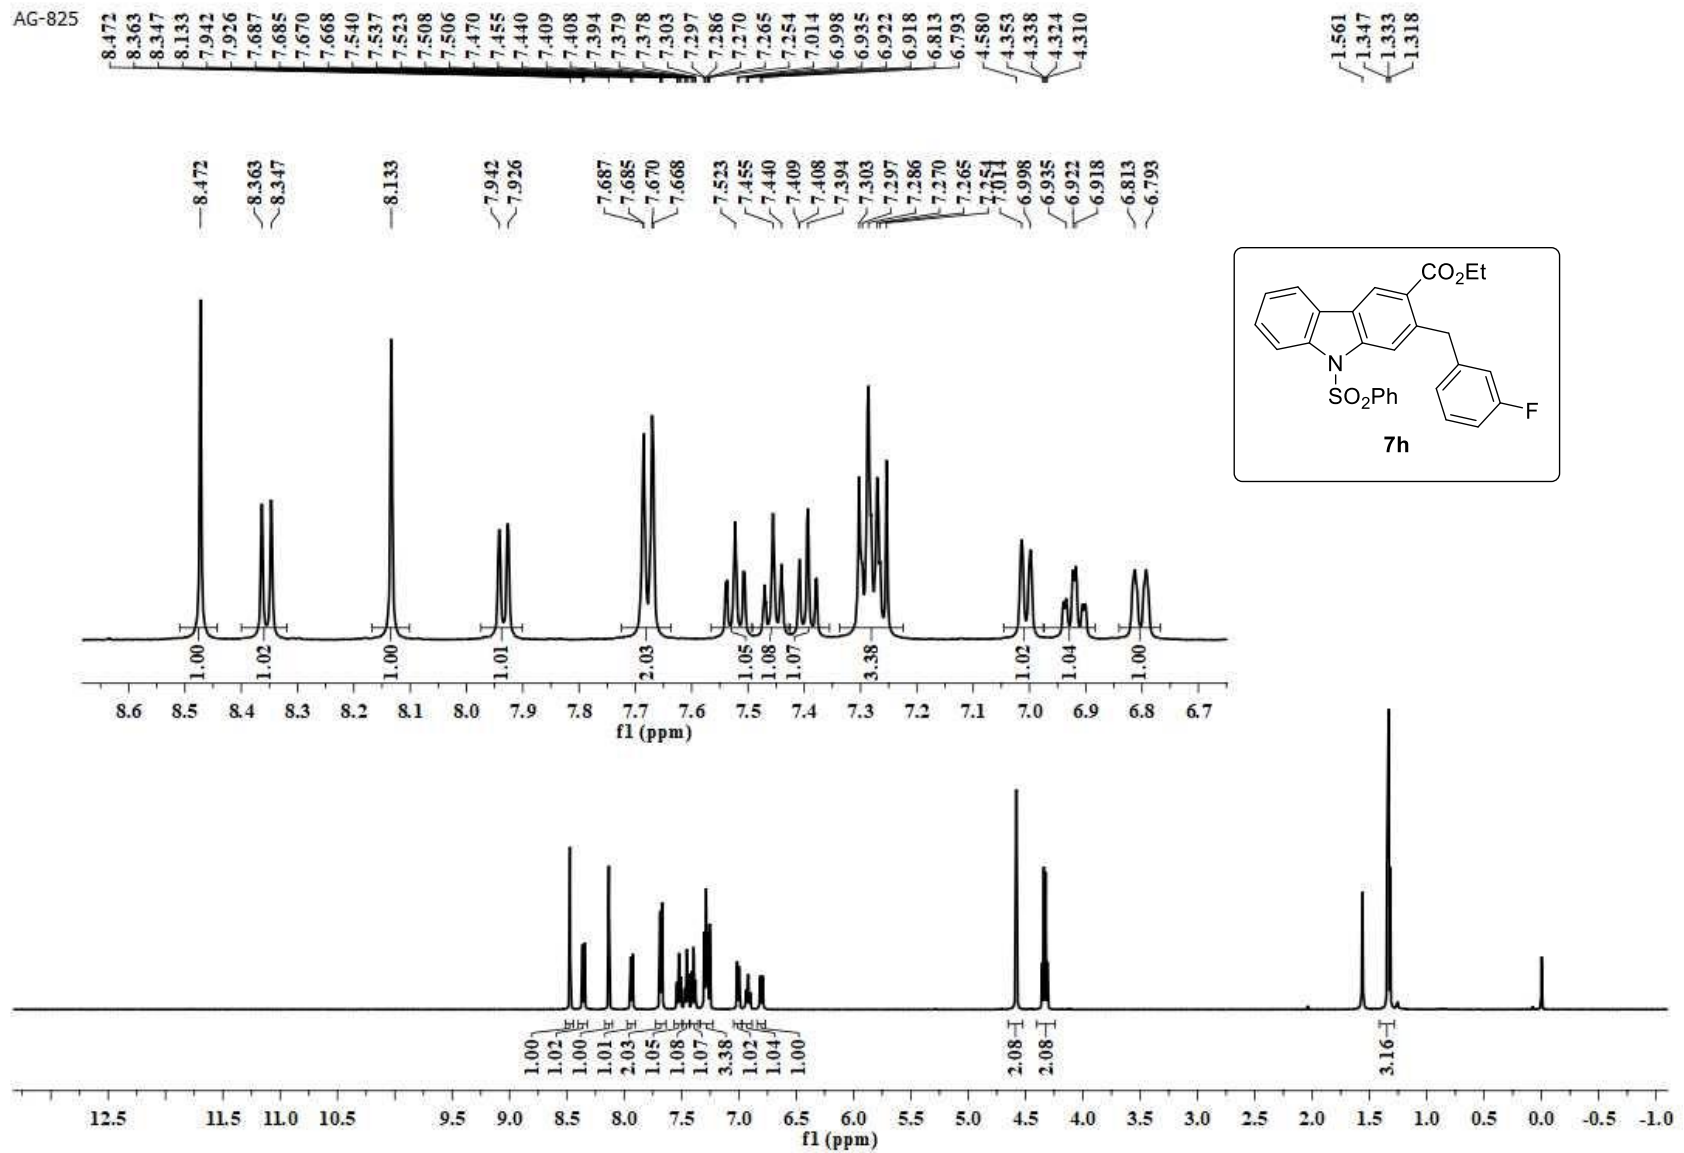

<sup>1</sup>H NMR (300 MHz, CDCl<sub>3</sub>) spectrum of compound **7h**

AG-825

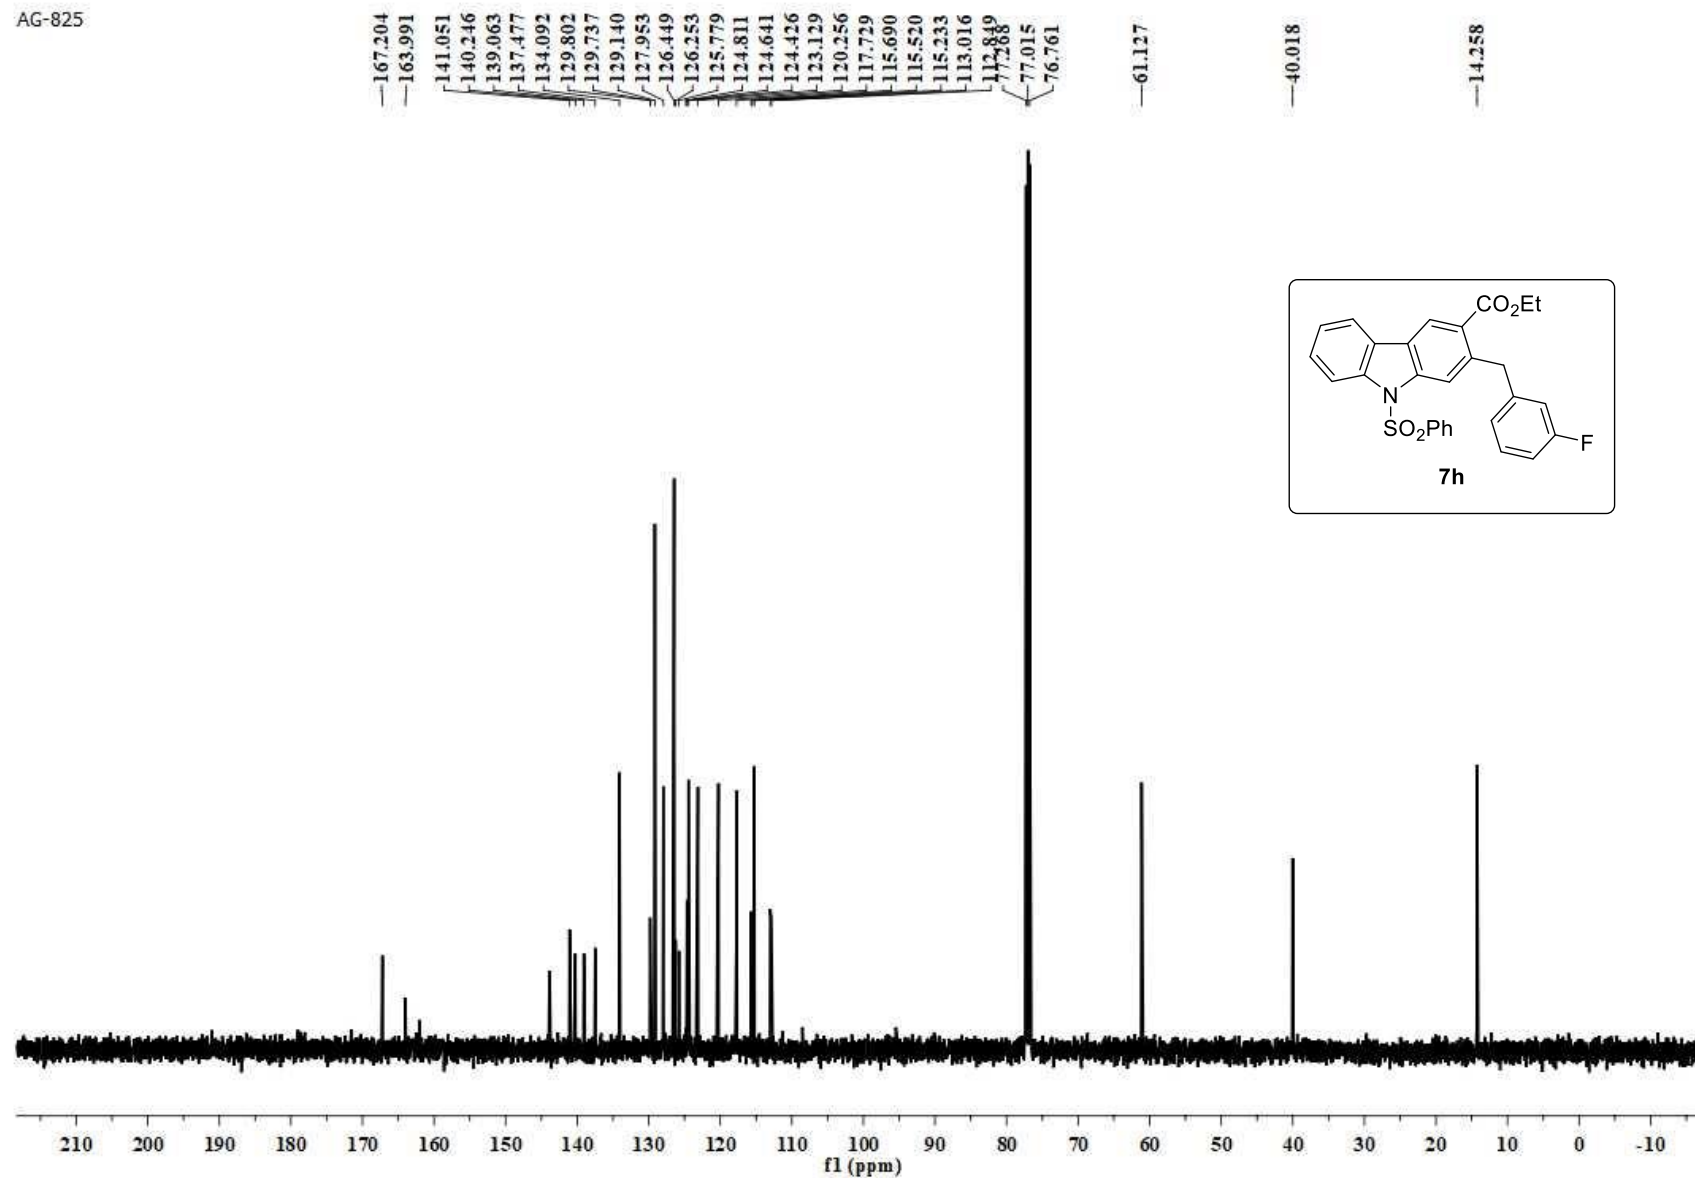

$^{13}\text{C}$   $\{^1\text{H}\}$  NMR (75 MHz,  $\text{CDCl}_3$ ) spectrum of compound **7h**



AG-826

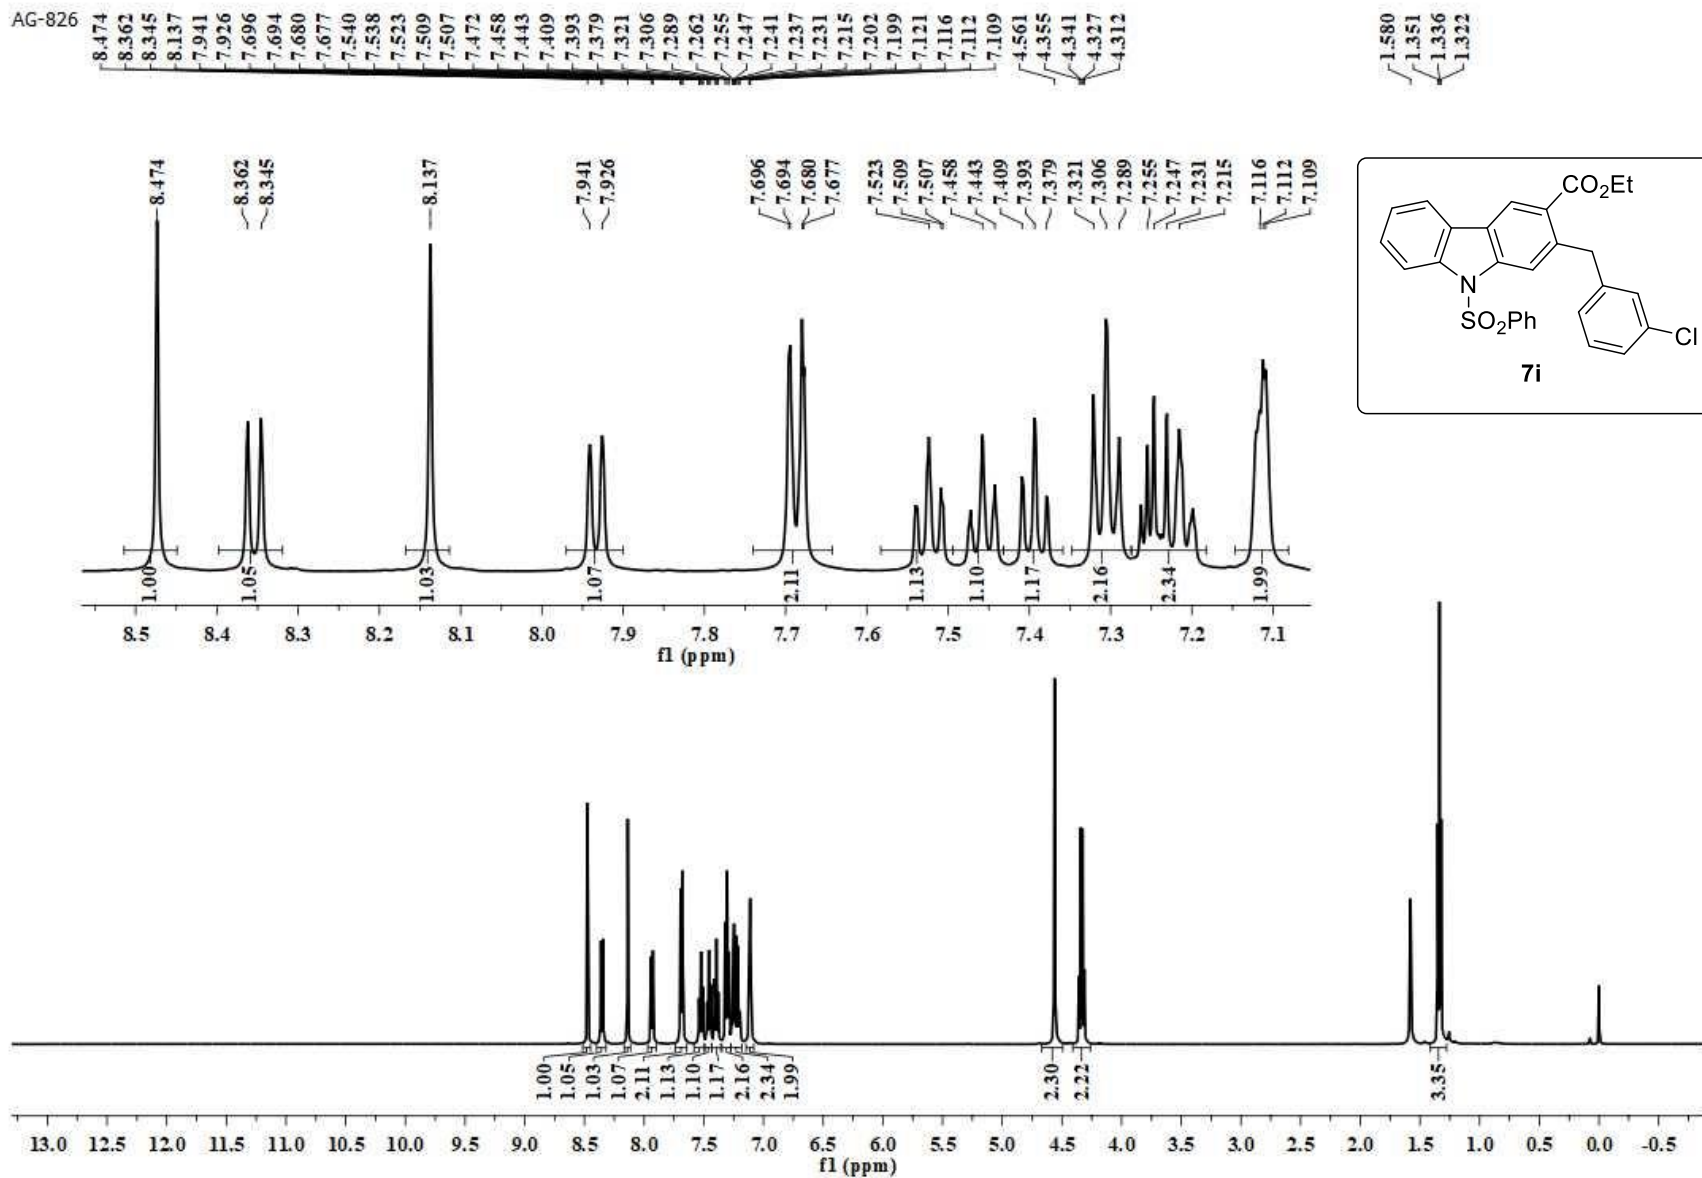

$^1\text{H}$  NMR (300 MHz,  $\text{CDCl}_3$ ) spectrum of compound **7i**

AG-826

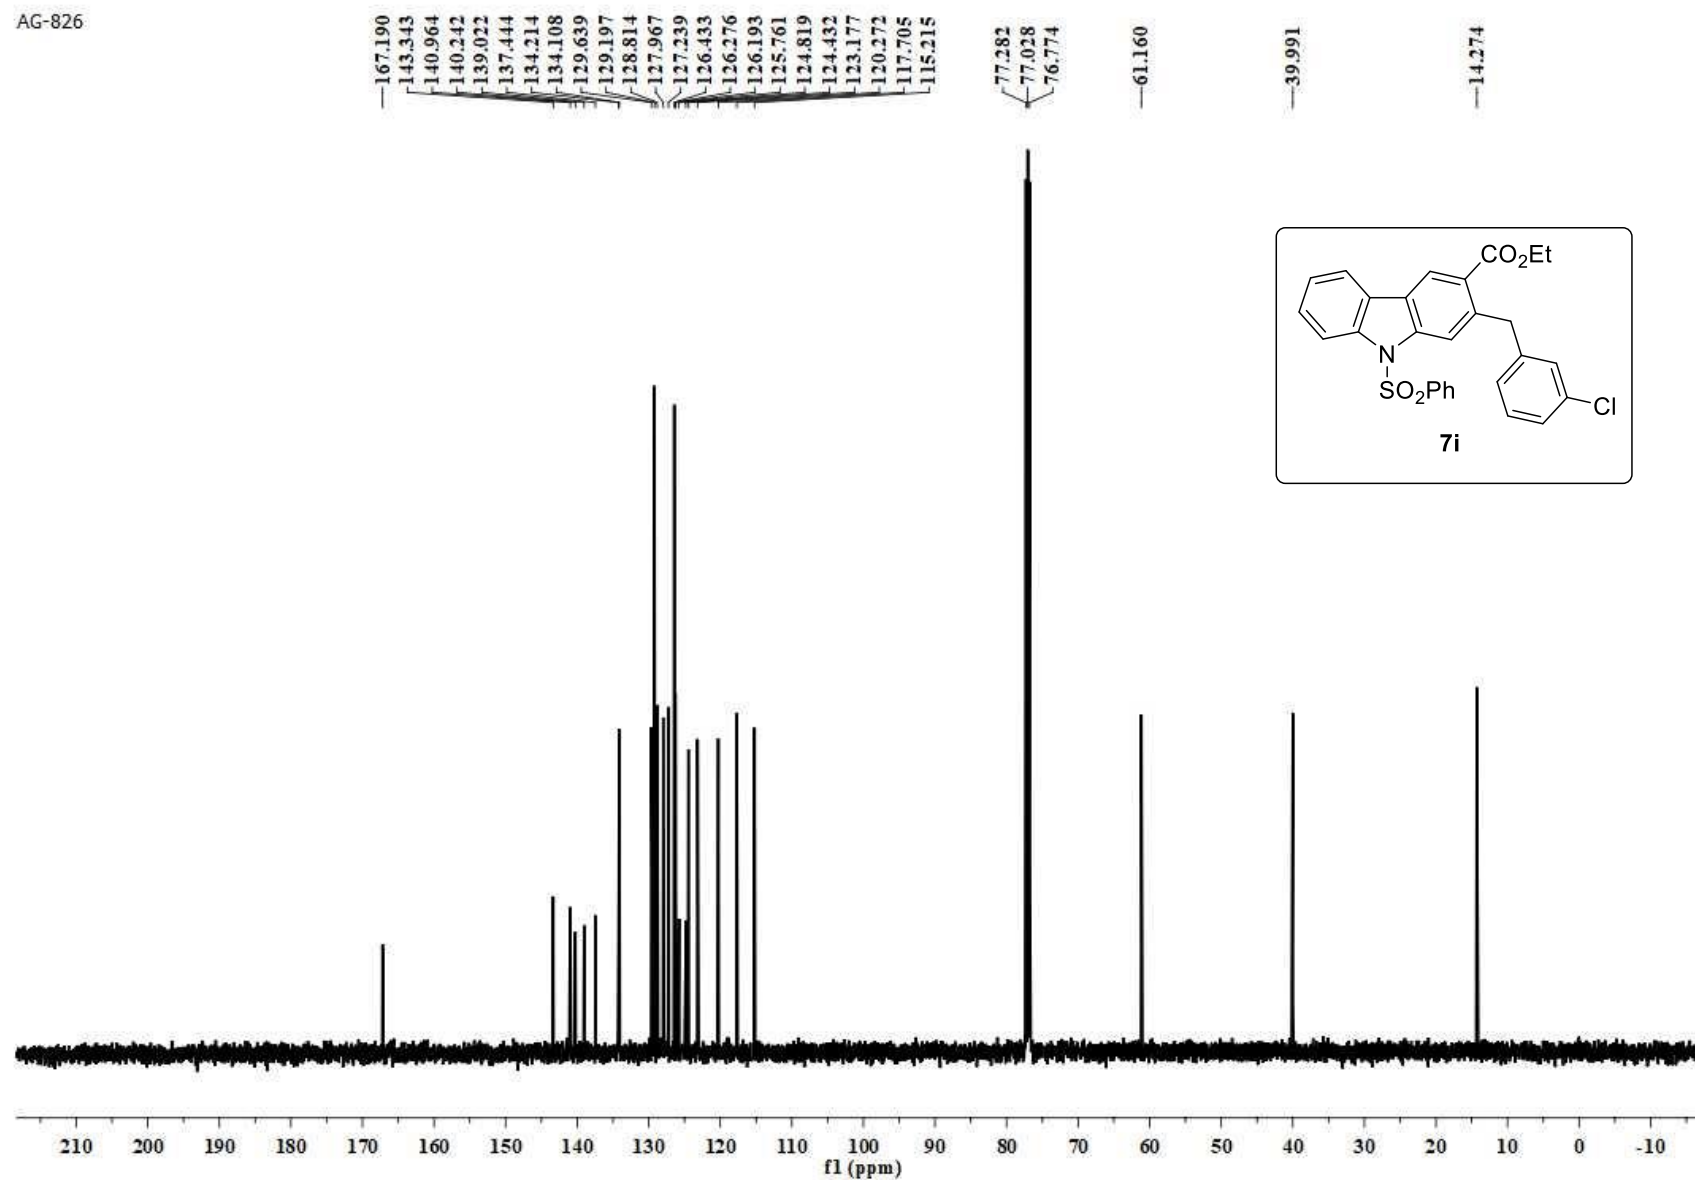

$^{13}\text{C}$   $\{^1\text{H}\}$  NMR (75 MHz,  $\text{CDCl}_3$ ) spectrum of compound **7i**

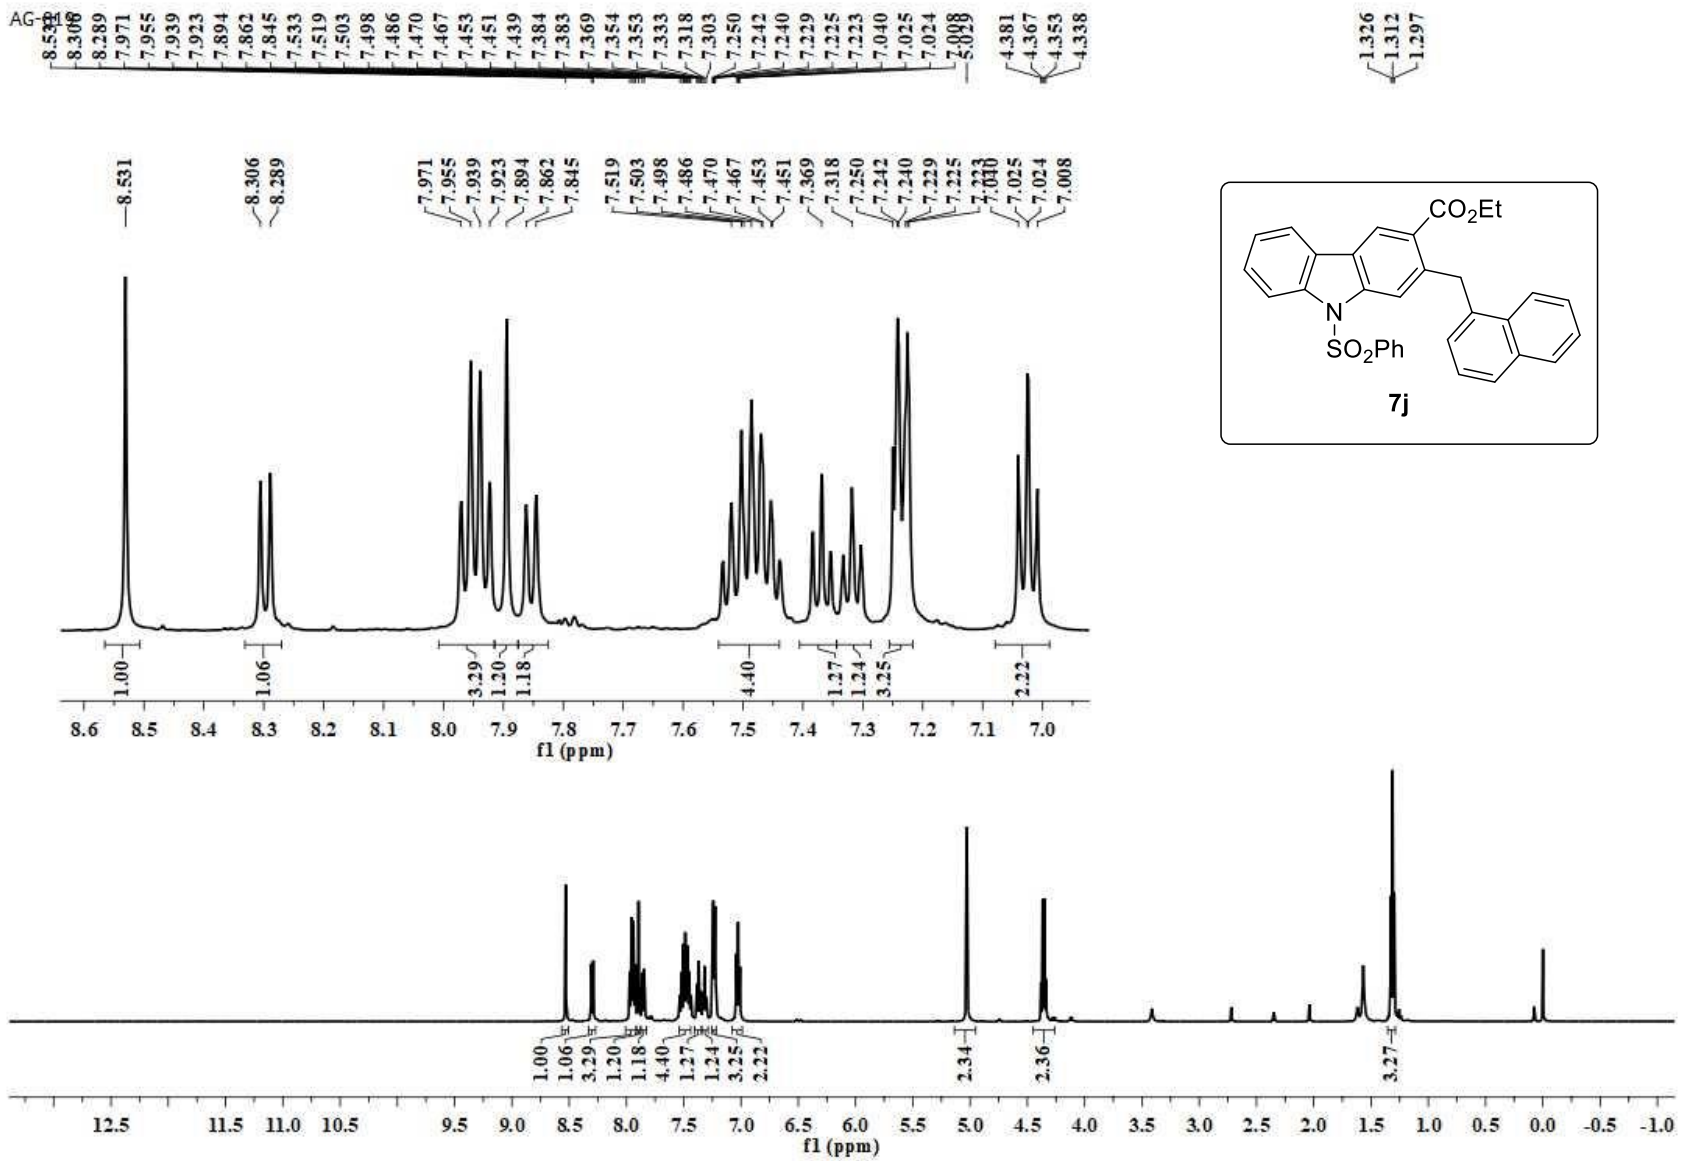

$^1\text{H}$  NMR (500 MHz,  $\text{CDCl}_3$ ) spectrum of compound 7j

AG-819

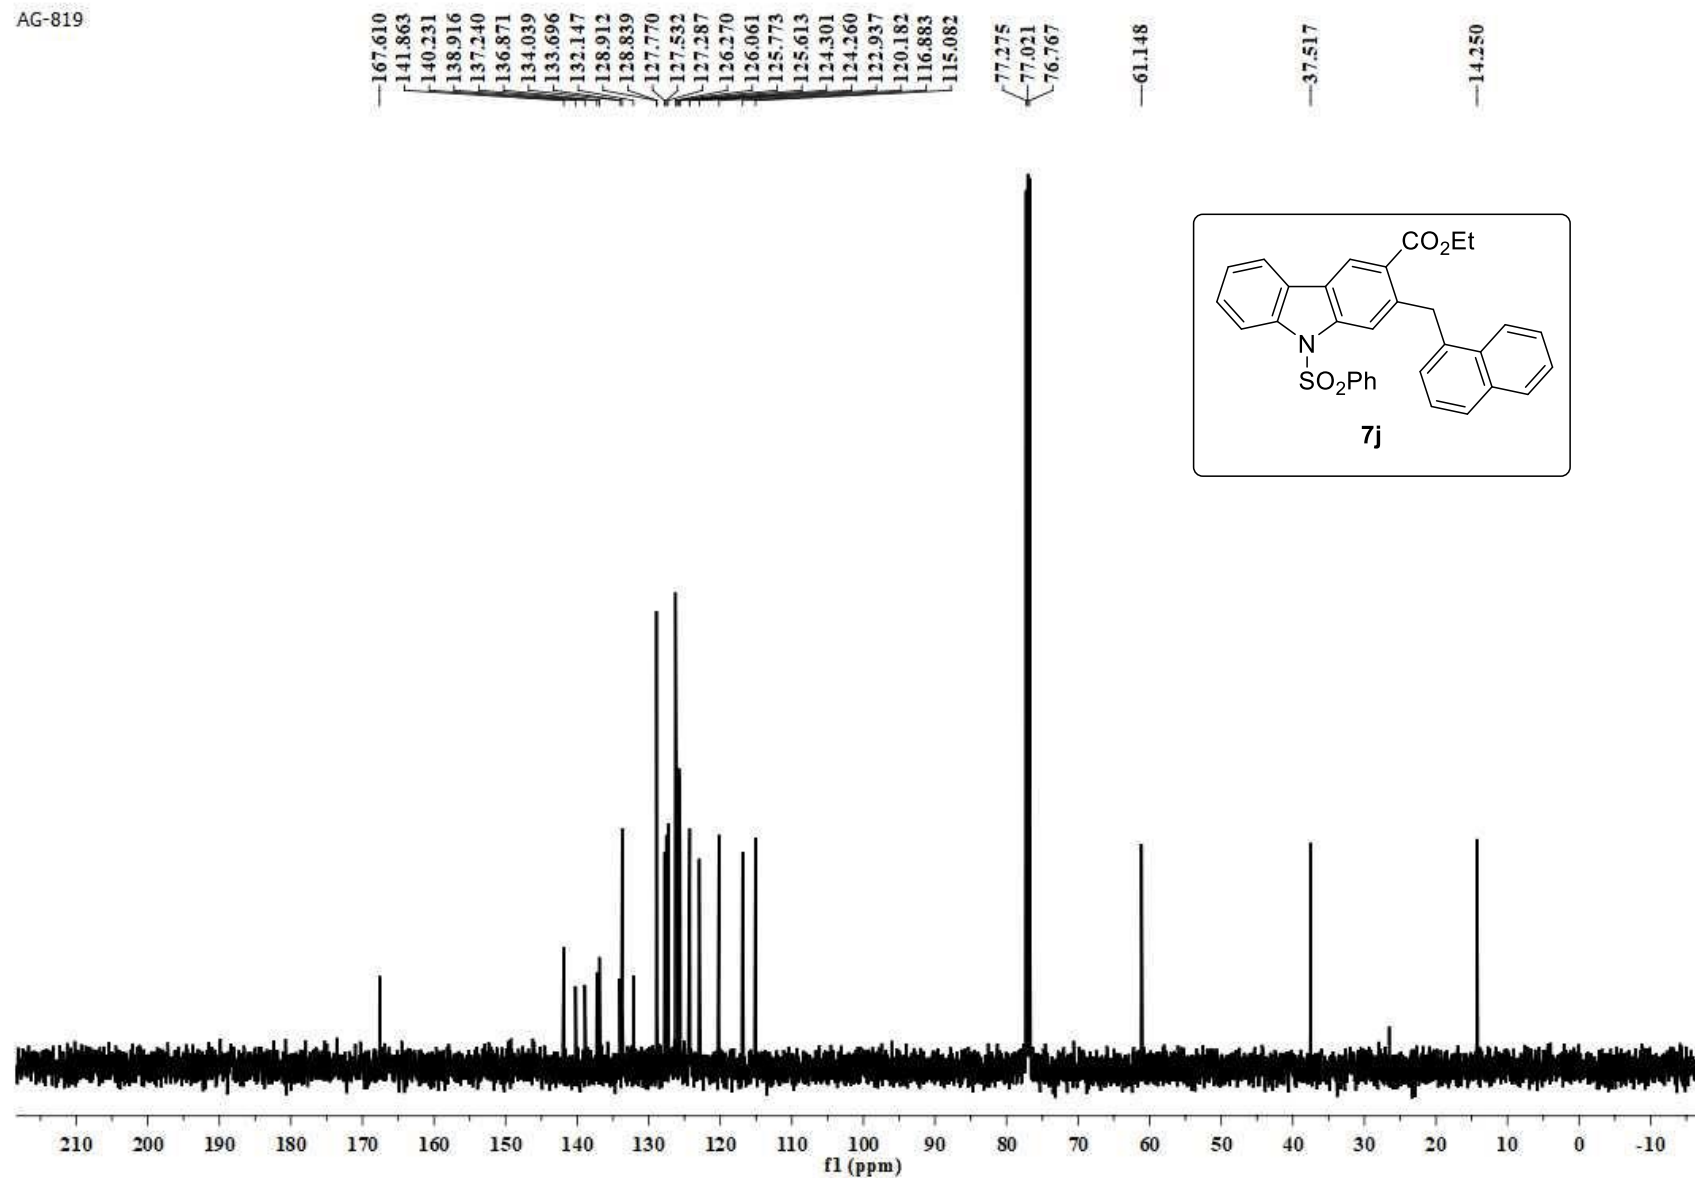

$^{13}\text{C}$   $\{^1\text{H}\}$  NMR (125 MHz,  $\text{CDCl}_3$ ) spectrum of compound **7j**

AG-819

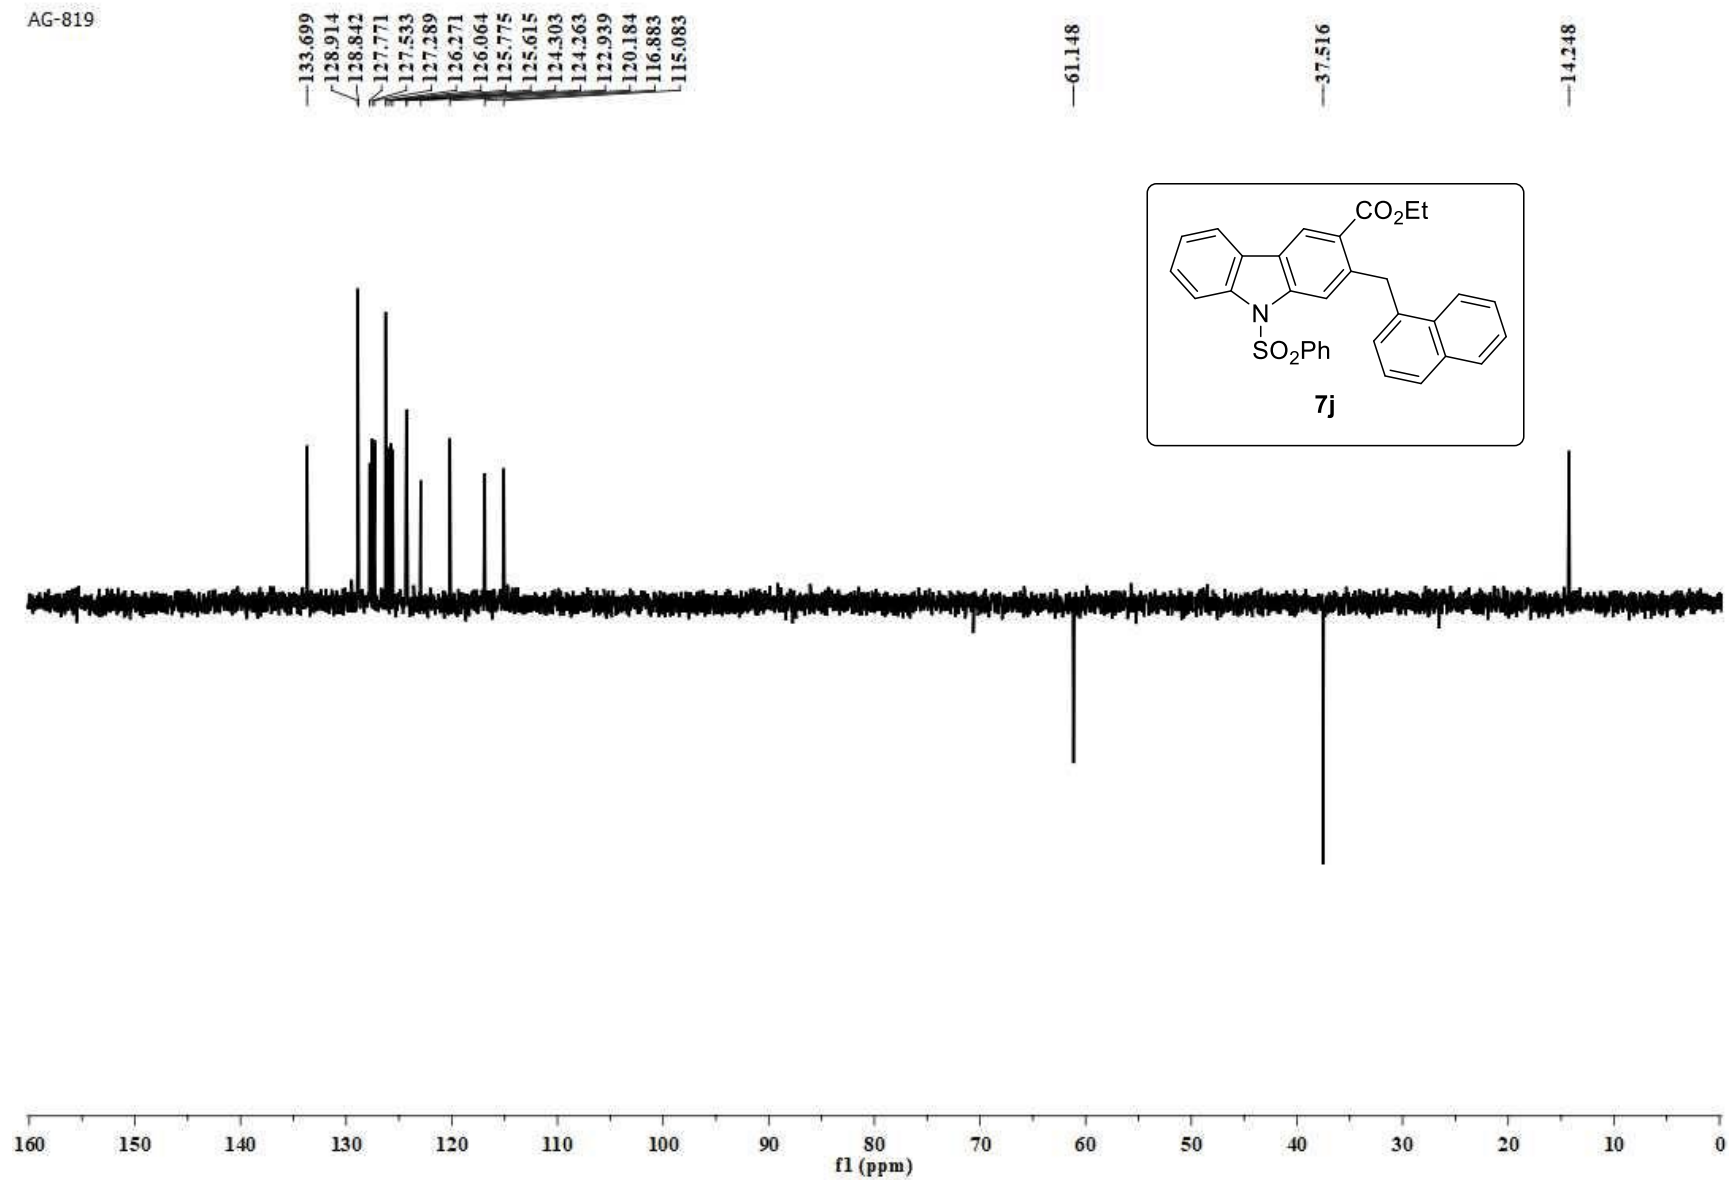

DEPT-135 NMR (125 MHz,  $\text{CDCl}_3$ ) spectrum of compound **7j**

AG-V-106

8.498  
8.389  
8.362  
8.213  
7.976  
7.952  
7.836  
7.804  
7.773  
7.604  
7.582  
7.542  
7.484  
7.469  
7.459  
7.416  
7.390  
7.279  
7.115  
7.091

4.770  
4.379  
4.358  
4.335  
4.311

1.635  
1.356  
1.334  
1.310

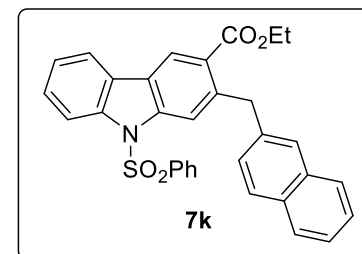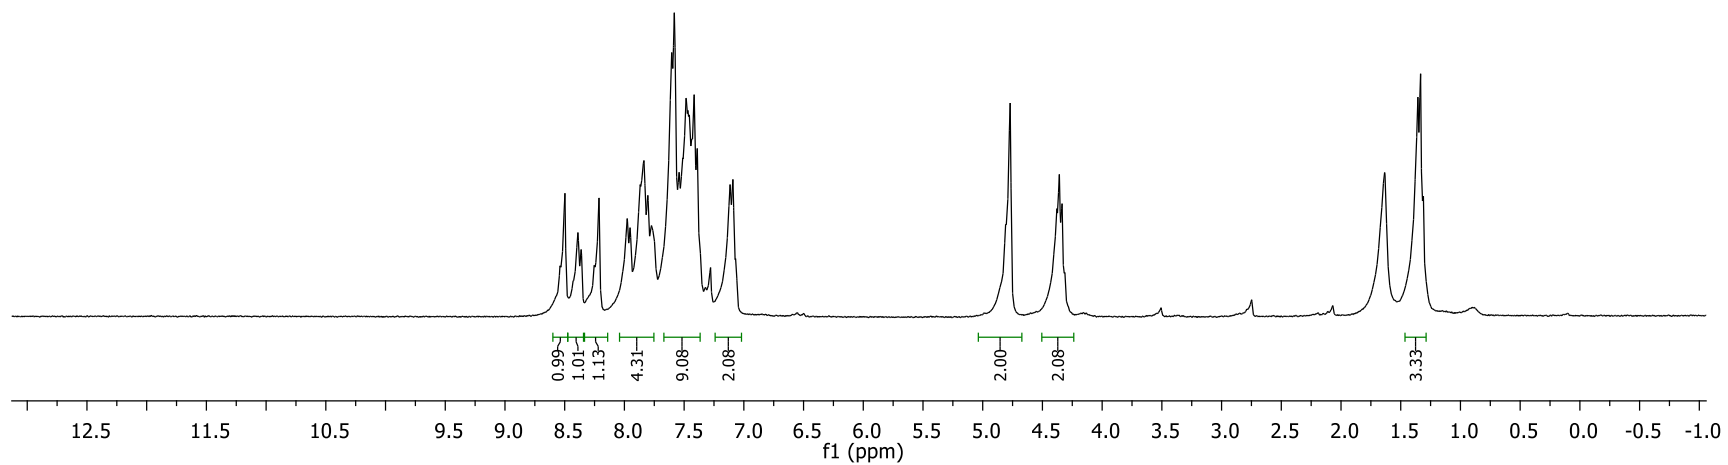

$^1\text{H}$  NMR (300 MHz,  $\text{CDCl}_3$ ) spectrum of compound **7k**

AG-V-106

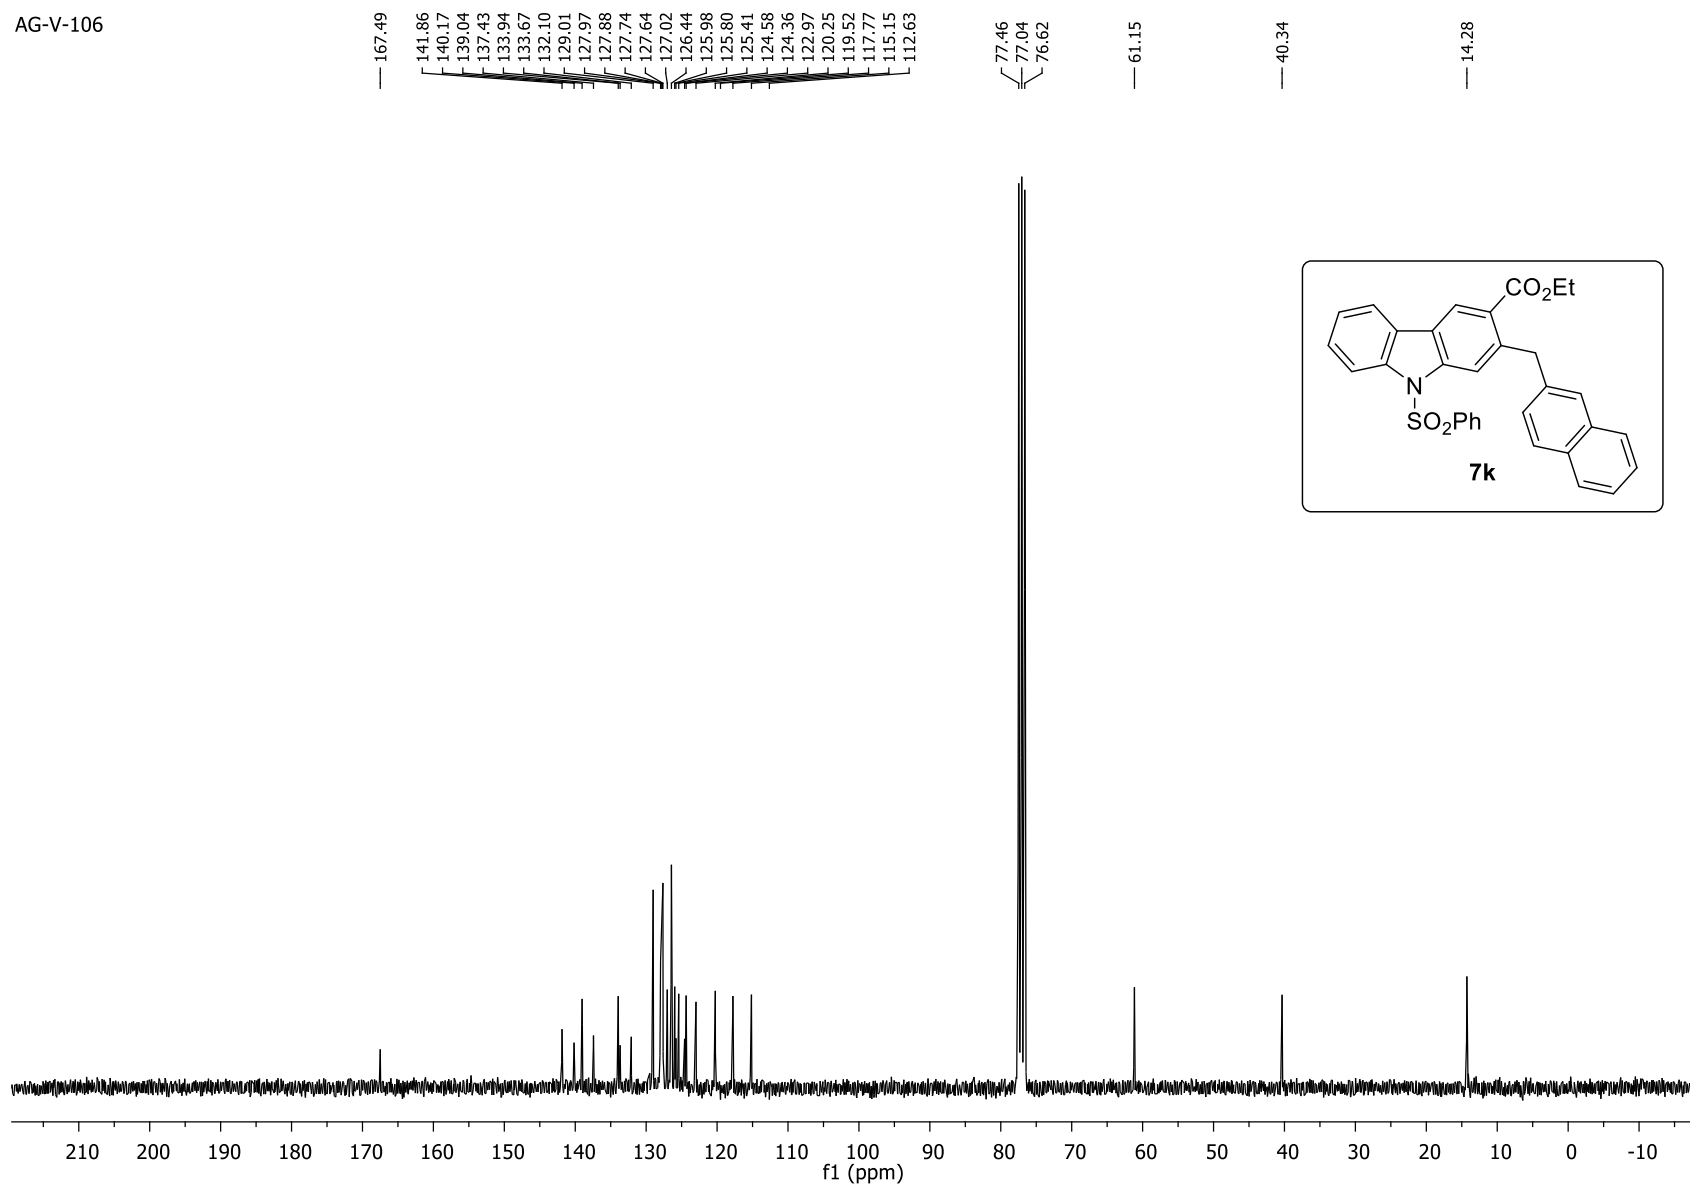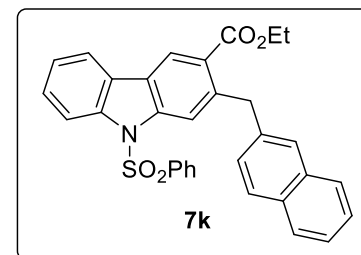

$^{13}\text{C} \{^1\text{H}\}$  NMR (75 MHz,  $\text{CDCl}_3$ ) spectrum of compound 7k

AG-V-106

133.95  
129.02  
127.97  
127.88  
127.73  
127.64  
127.02  
126.44  
125.98  
125.41  
124.36  
122.98  
120.26  
117.76  
115.15

61.16

40.34

14.29

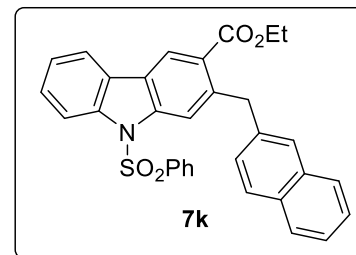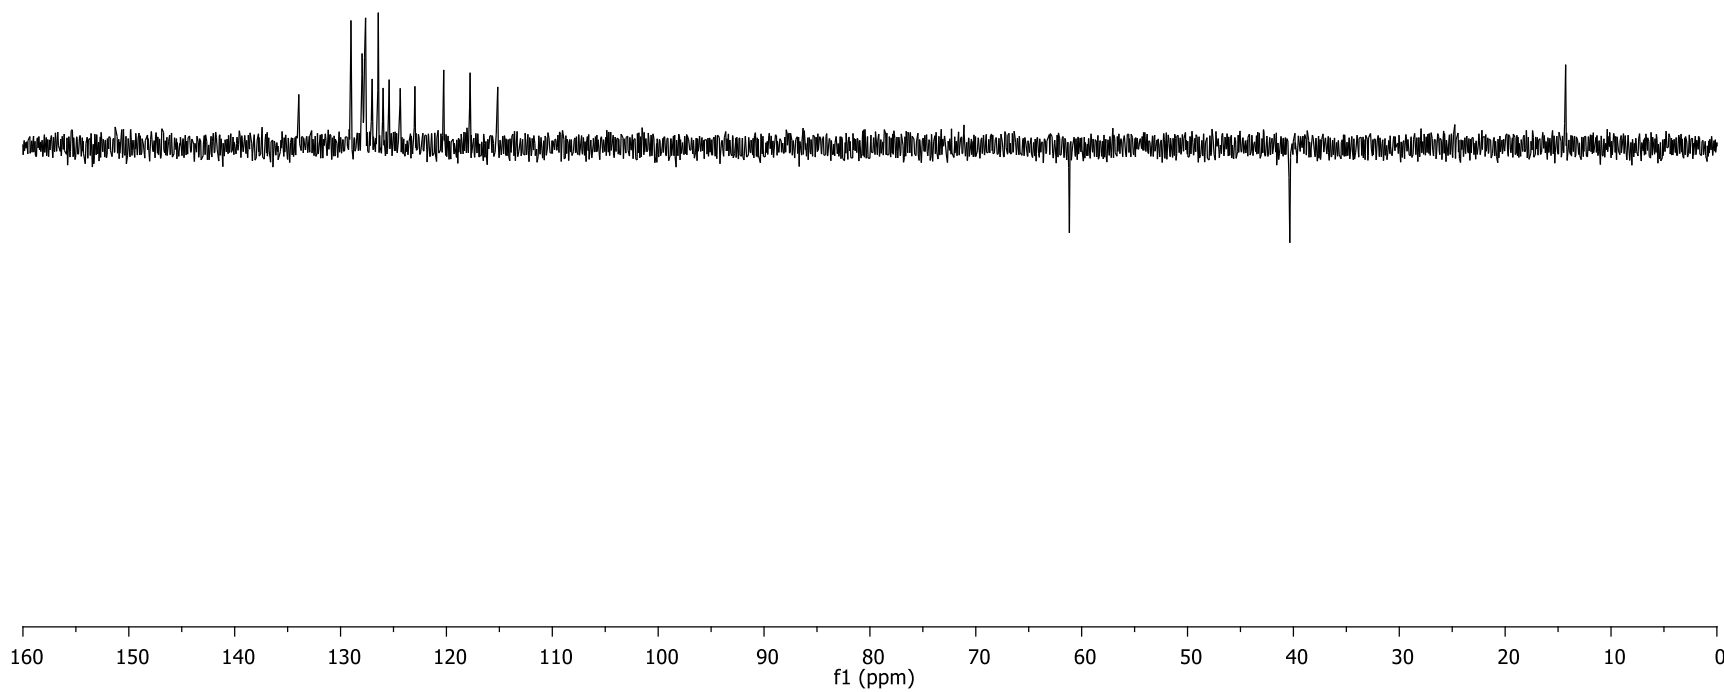

DEPT-135 NMR (75 MHz, CDCl<sub>3</sub>) spectrum of compound **7k**



DRAKM  
AG-V-106 2 (0.090) AM2 (Ar,20000.0,556.28,0.00,LS 10)

1: TOF MS ES+  
3.54e5

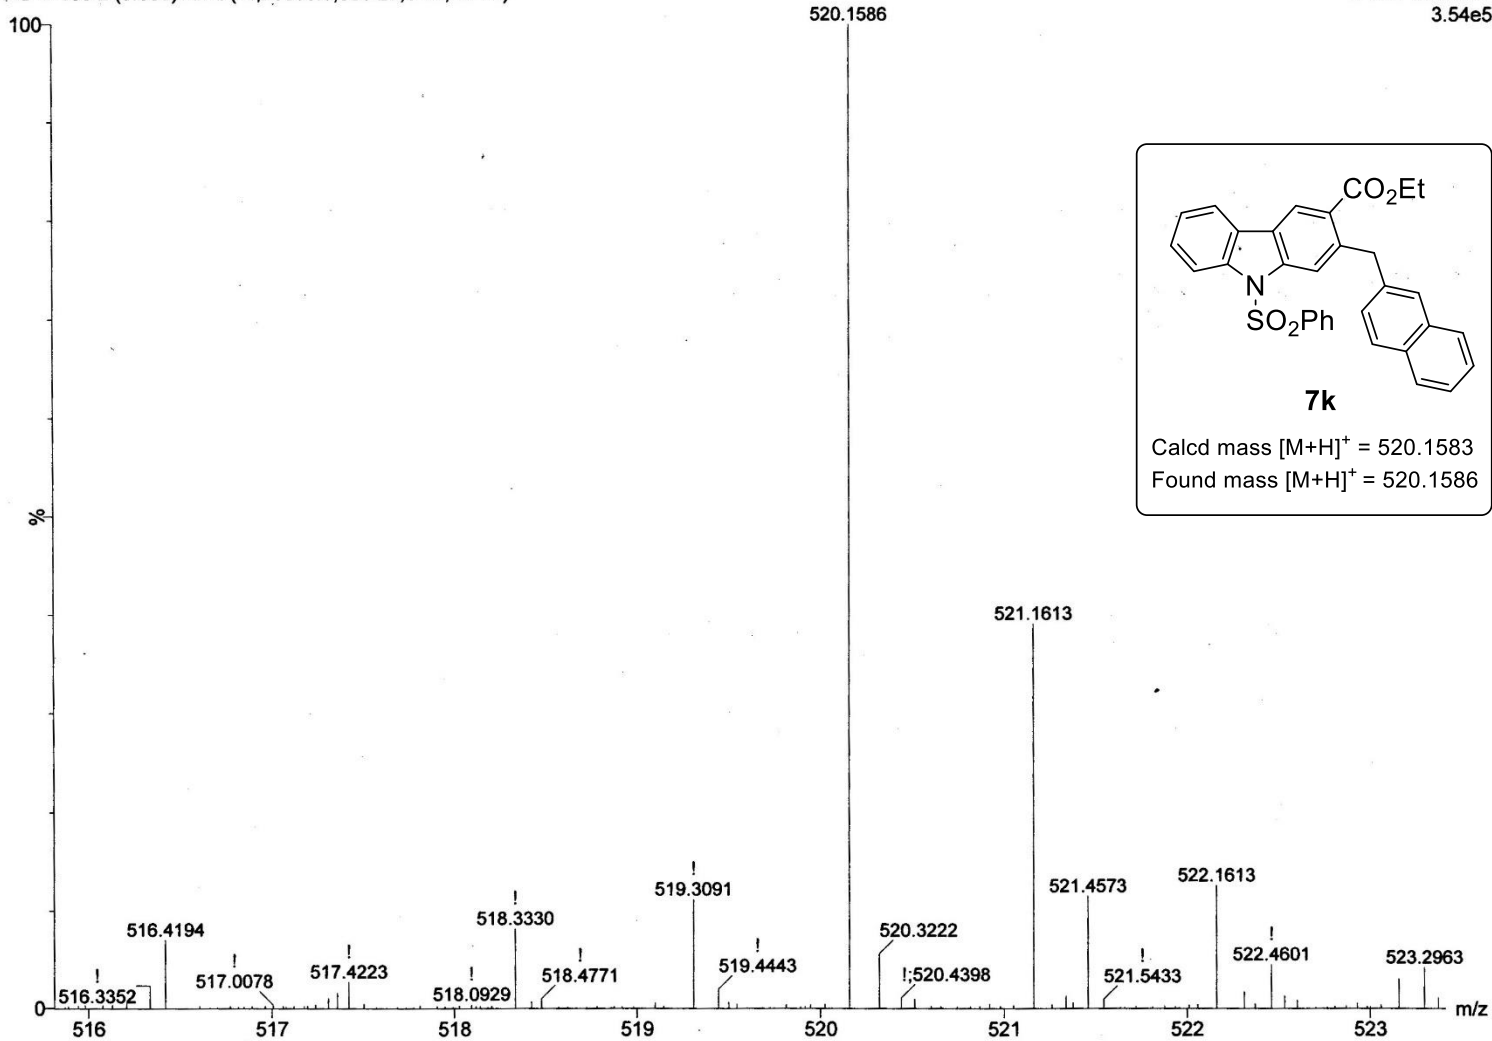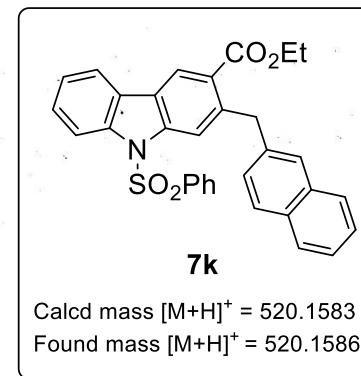

HRMS Spectrum of compound **7k**

AG-V-108R3

8.764  
8.736  
8.670  
8.645  
8.515  
8.255  
8.228  
8.009  
7.966  
7.912  
7.887  
7.660  
7.638  
7.608  
7.578  
7.546  
7.524  
7.460  
7.436  
7.410  
7.345  
7.303  
7.224  
7.190  
6.924  
6.900  
6.873

4.999

4.299  
4.275  
4.252  
4.230

1.513  
1.227  
1.204  
1.182

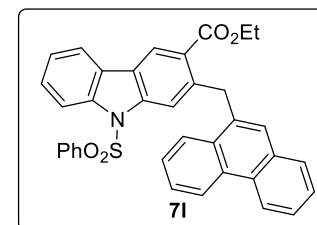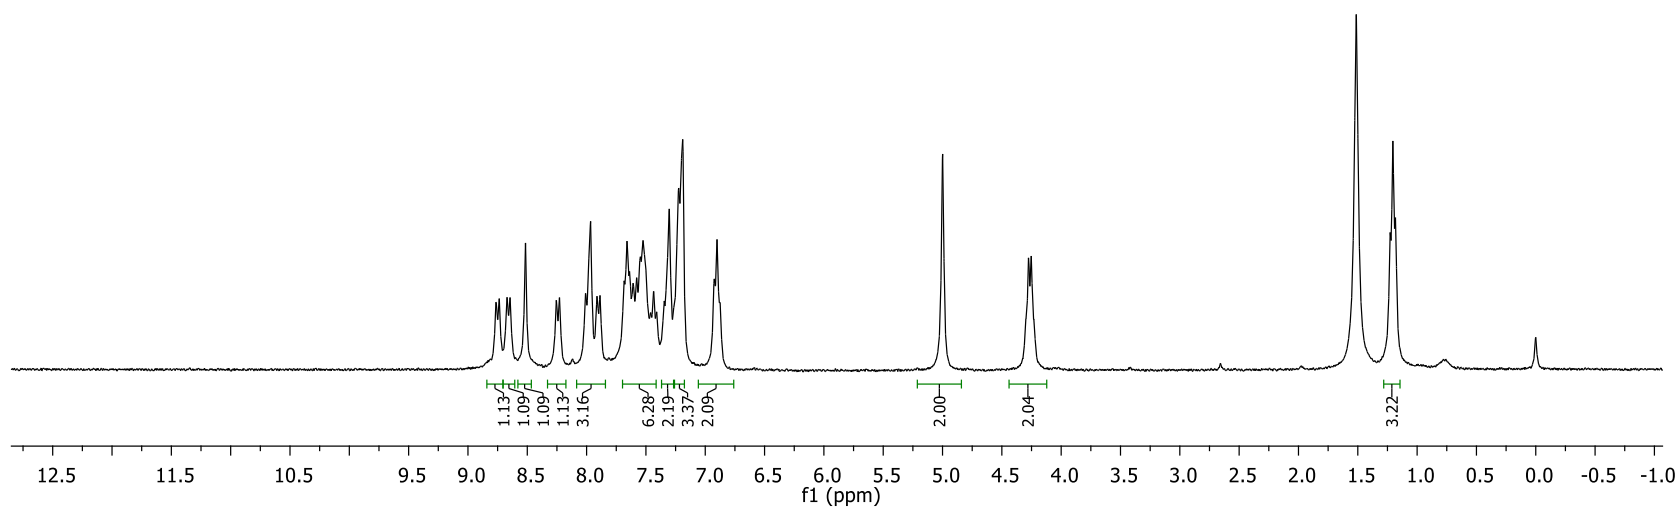

<sup>1</sup>H NMR (300 MHz, CDCl<sub>3</sub>) spectrum of compound **7I**

AG-V-108R3

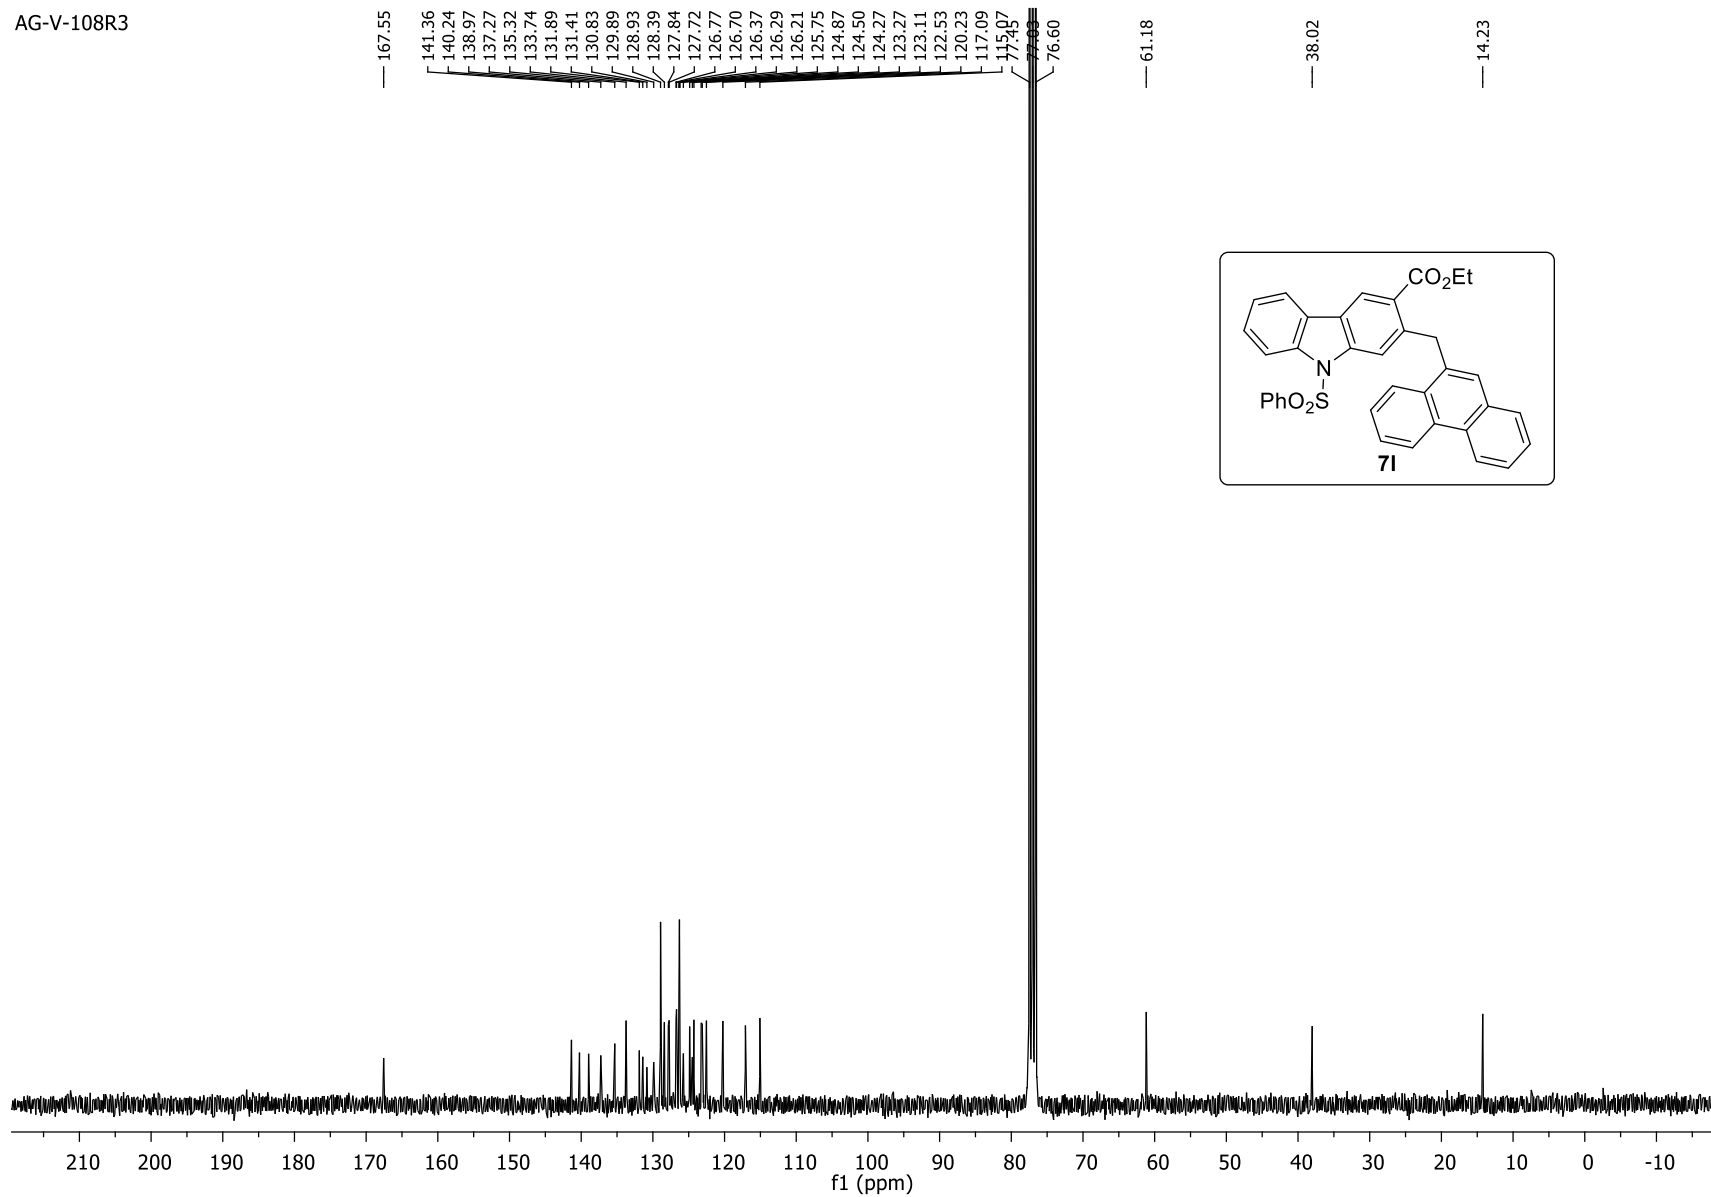

<sup>13</sup>C {<sup>1</sup>H} NMR (75 MHz, CDCl<sub>3</sub>) spectrum of compound **71**

AG-V-108R3

133.75  
128.93  
128.39  
127.84  
127.72  
126.71  
126.37  
126.30  
124.87  
124.28  
123.27  
123.11  
122.54  
120.24  
117.09  
115.07

61.18

38.03

14.24

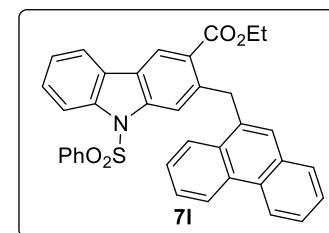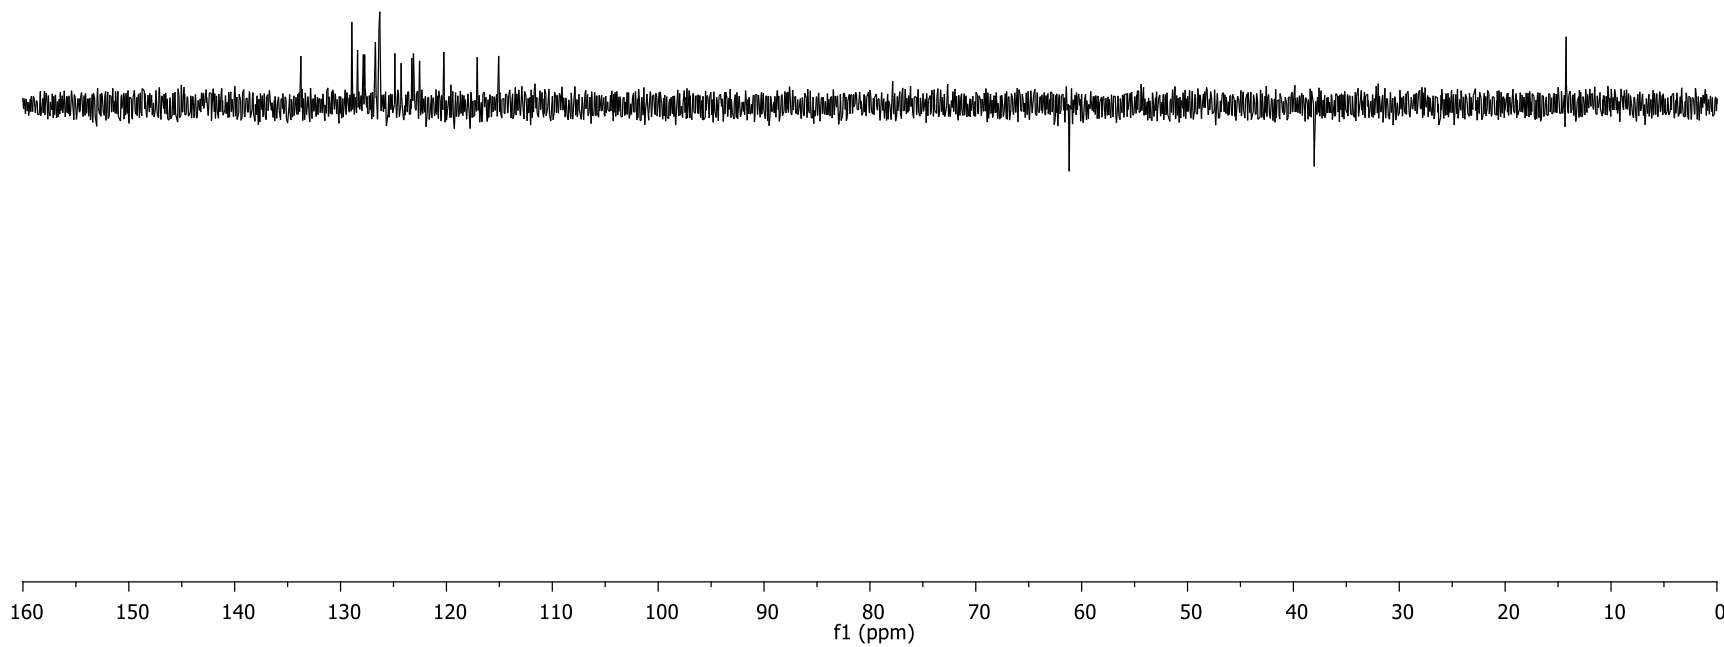

DEPT-135 NMR (75 MHz, CDCl<sub>3</sub>) spectrum of compound **71**

AG-829

8.465  
8.344  
8.328  
8.252  
7.928  
7.913  
7.732  
7.717  
7.509  
7.440  
7.425  
7.394  
7.379  
7.294  
7.278  
7.262  
7.253  
7.178  
7.169  
7.167  
6.969  
6.962  
6.959  
6.952  
6.854  
6.849

4.764  
4.404  
4.390  
4.375  
4.361

1.398  
1.384  
1.369

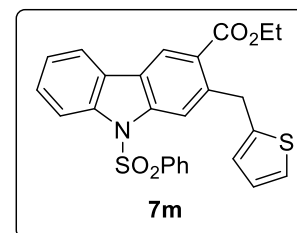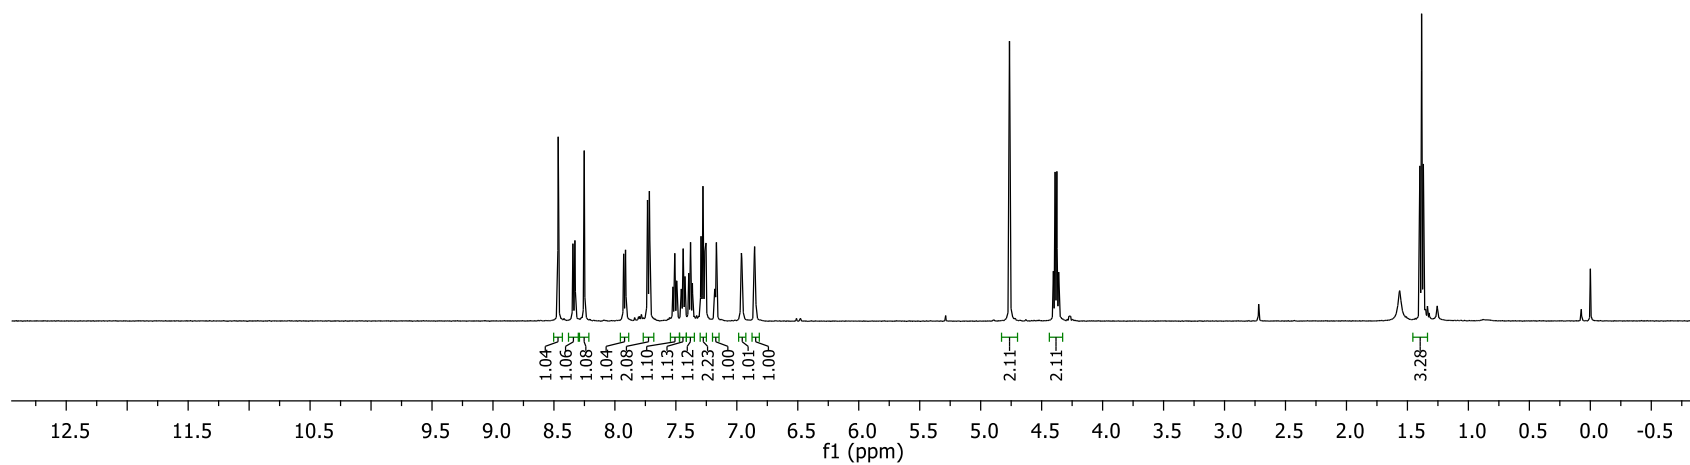

<sup>1</sup>H NMR (500 MHz, CDCl<sub>3</sub>) spectrum of compound **7m**

AG-829

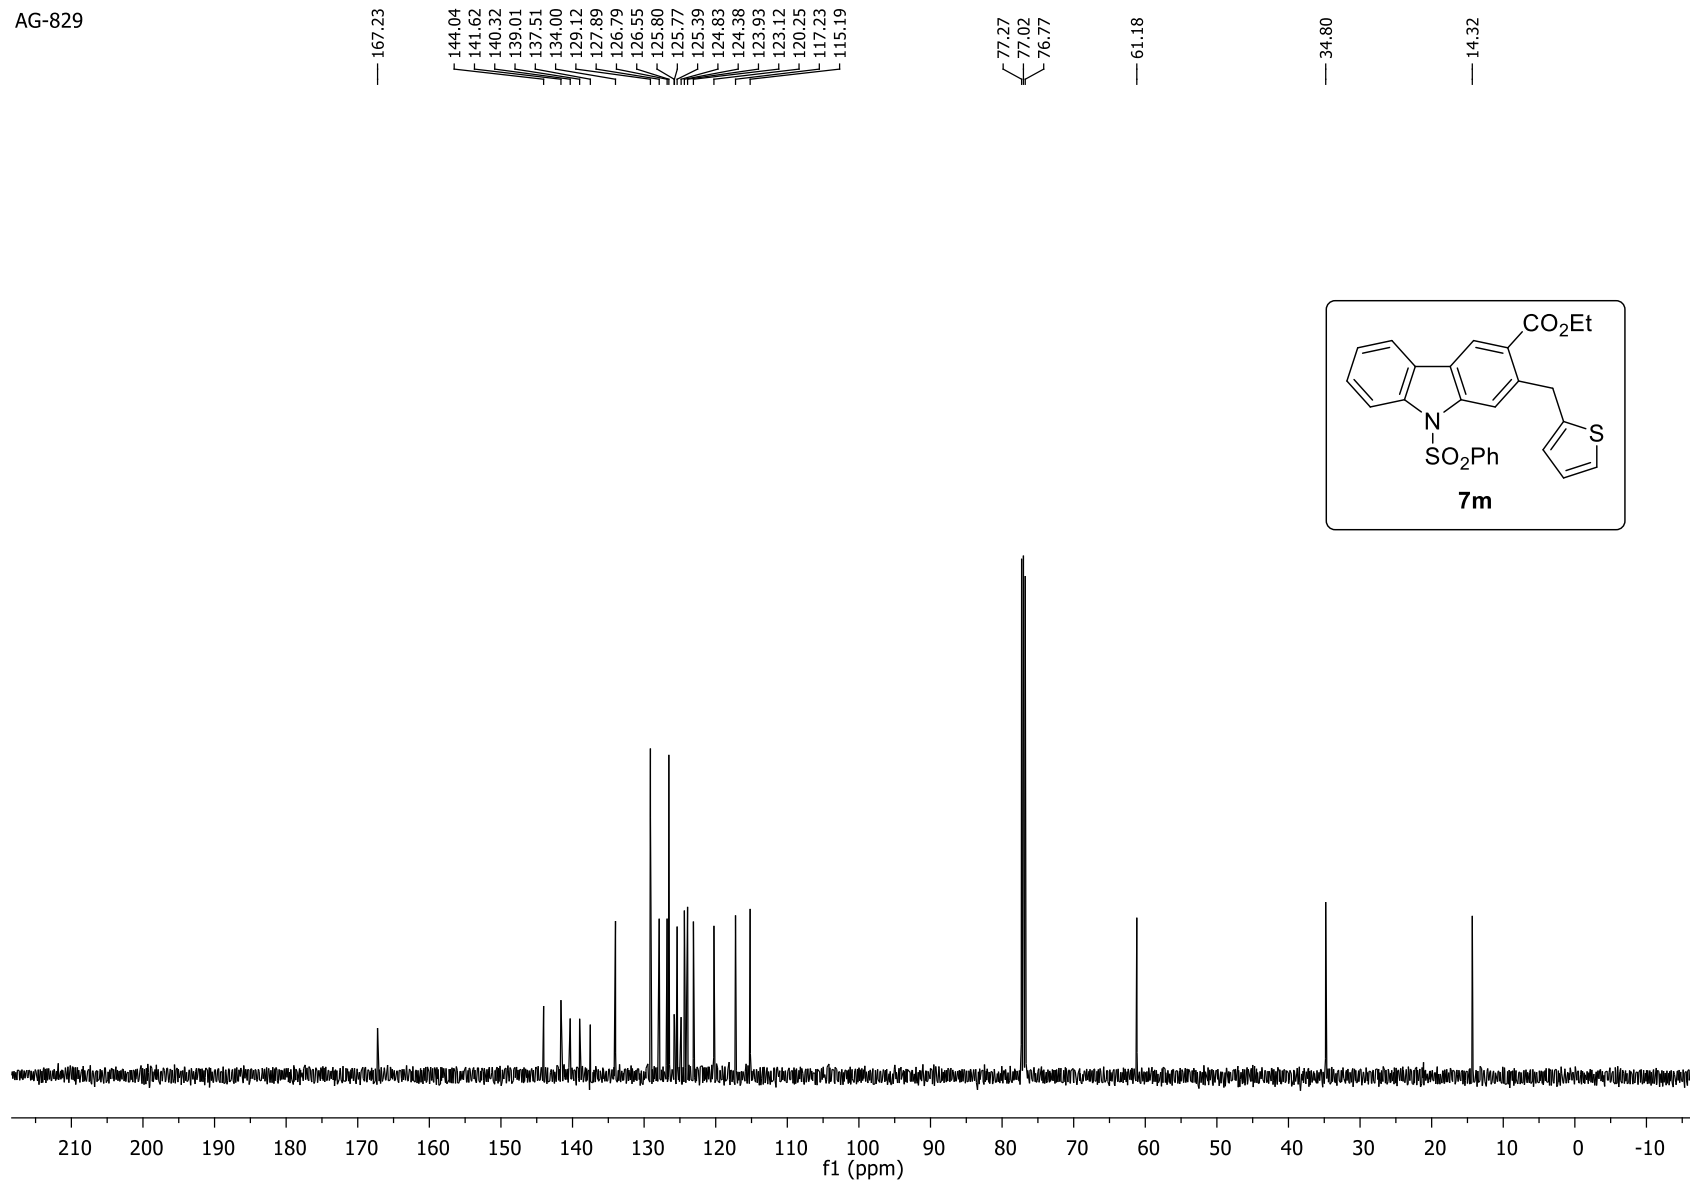

$^{13}\text{C}$  { $^1\text{H}$ } NMR (125 MHz,  $\text{CDCl}_3$ ) spectrum of compound **7m**

AG-665

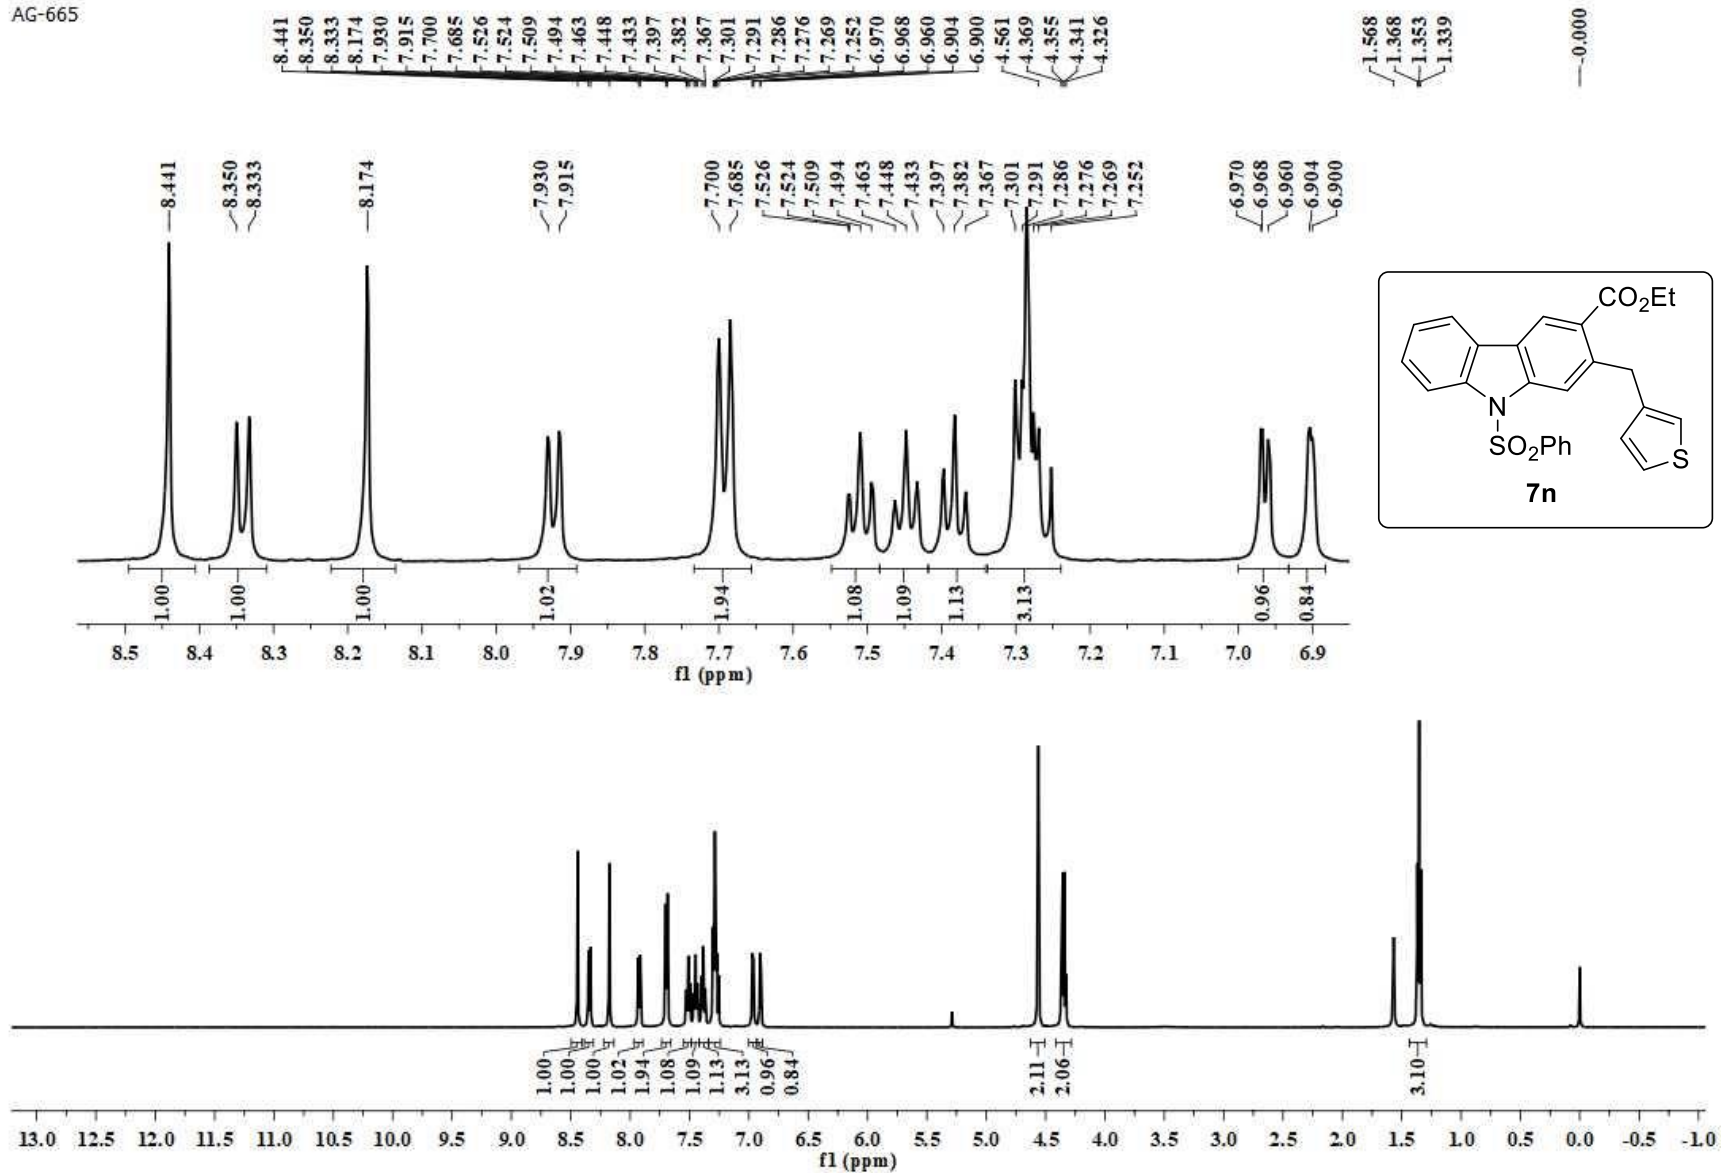

**<sup>1</sup>H NMR (500 MHz, CDCl<sub>3</sub>) spectrum of compound 7n**

AG-665

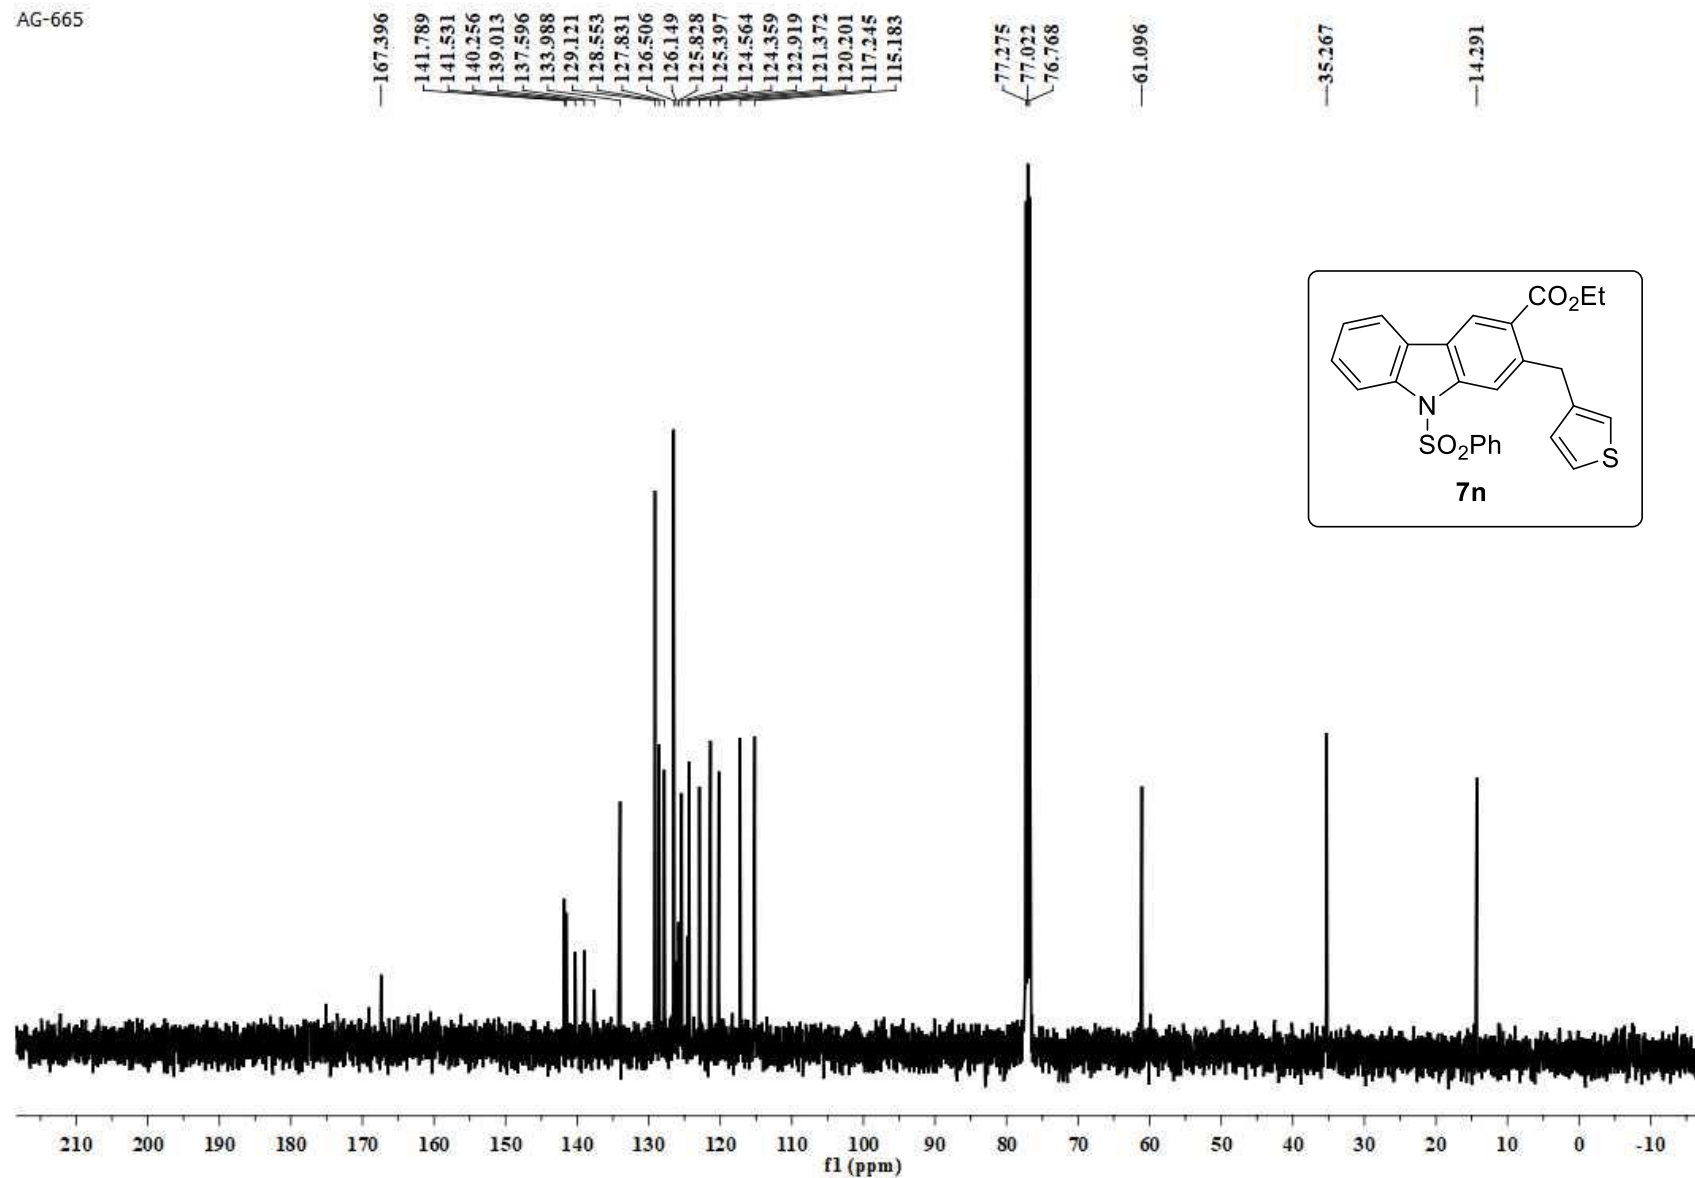

$^{13}\text{C} \{^1\text{H}\}$  NMR (125 MHz,  $\text{CDCl}_3$ ) spectrum of compound **7n**



AG-IV-271

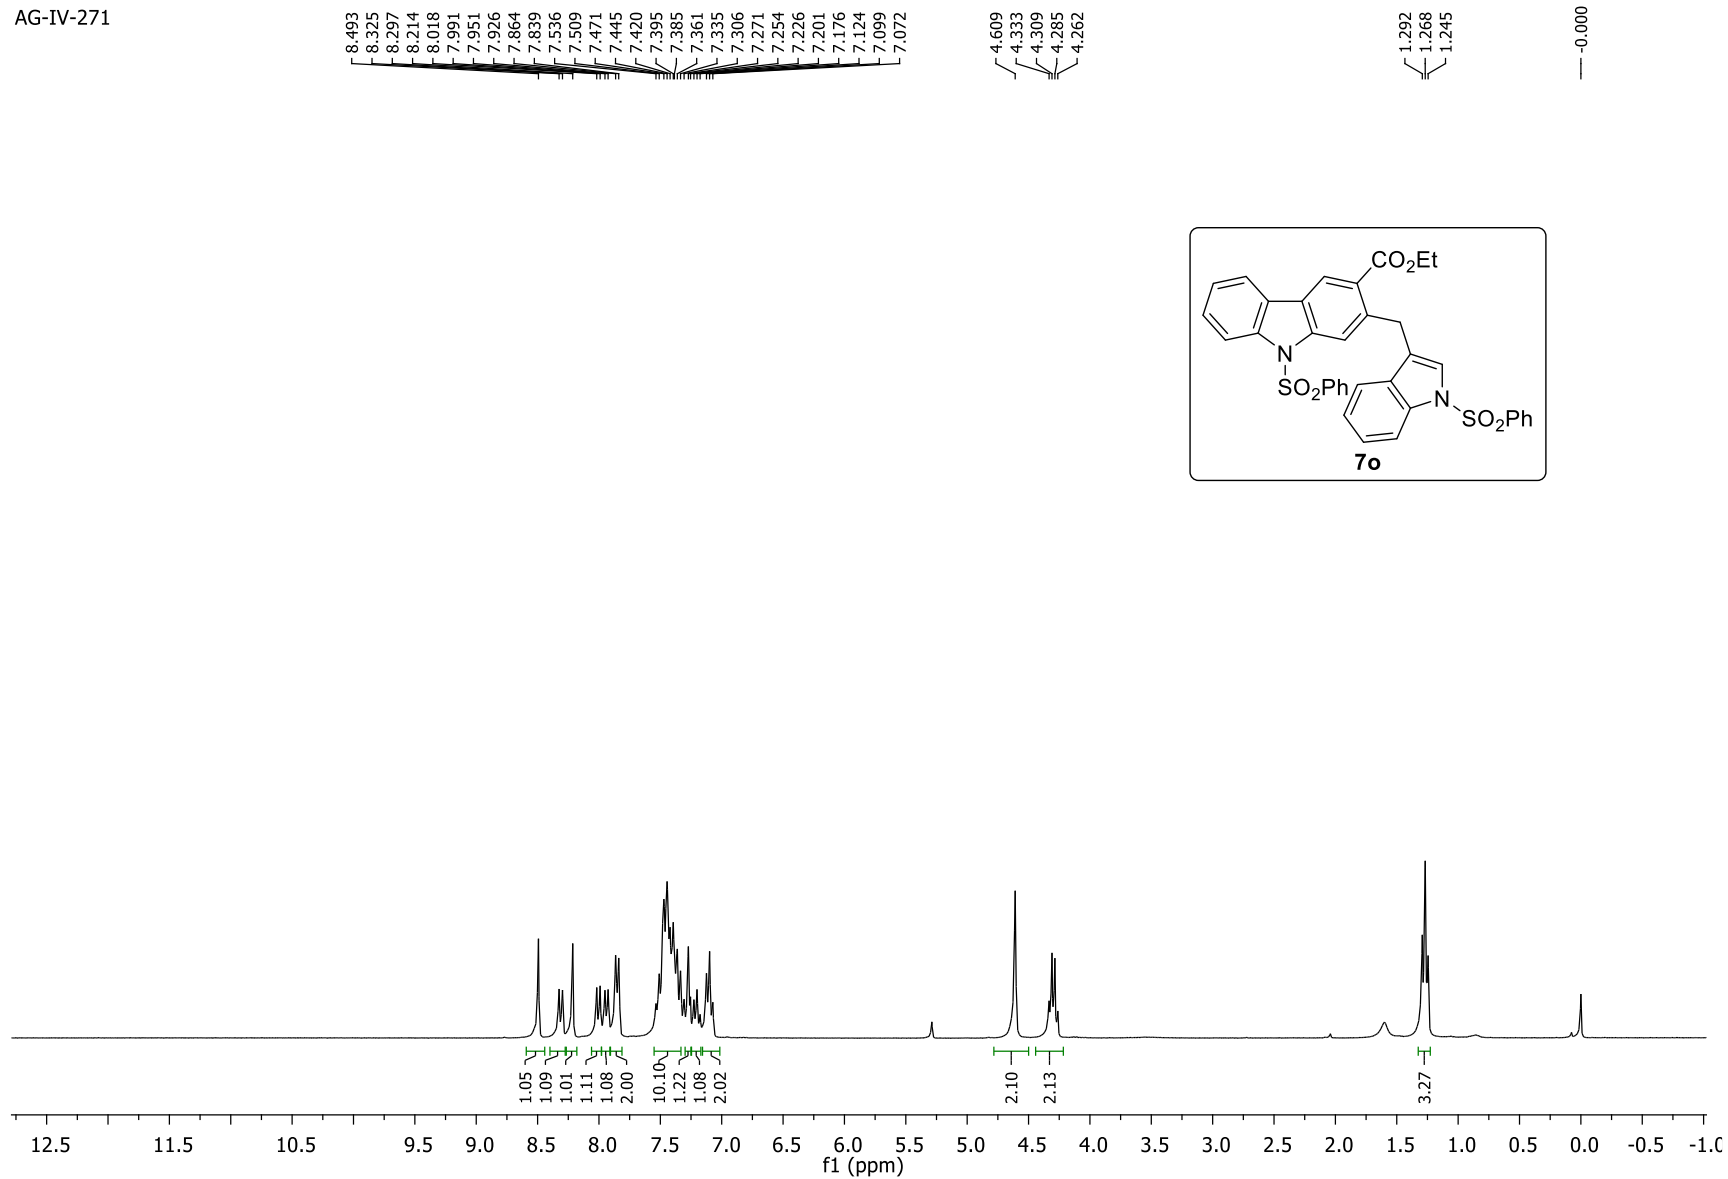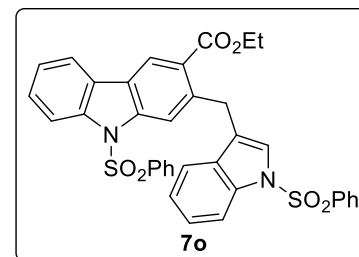

**<sup>1</sup>H NMR (300 MHz, CDCl<sub>3</sub>) spectrum of compound **7o****

AG-IV-271

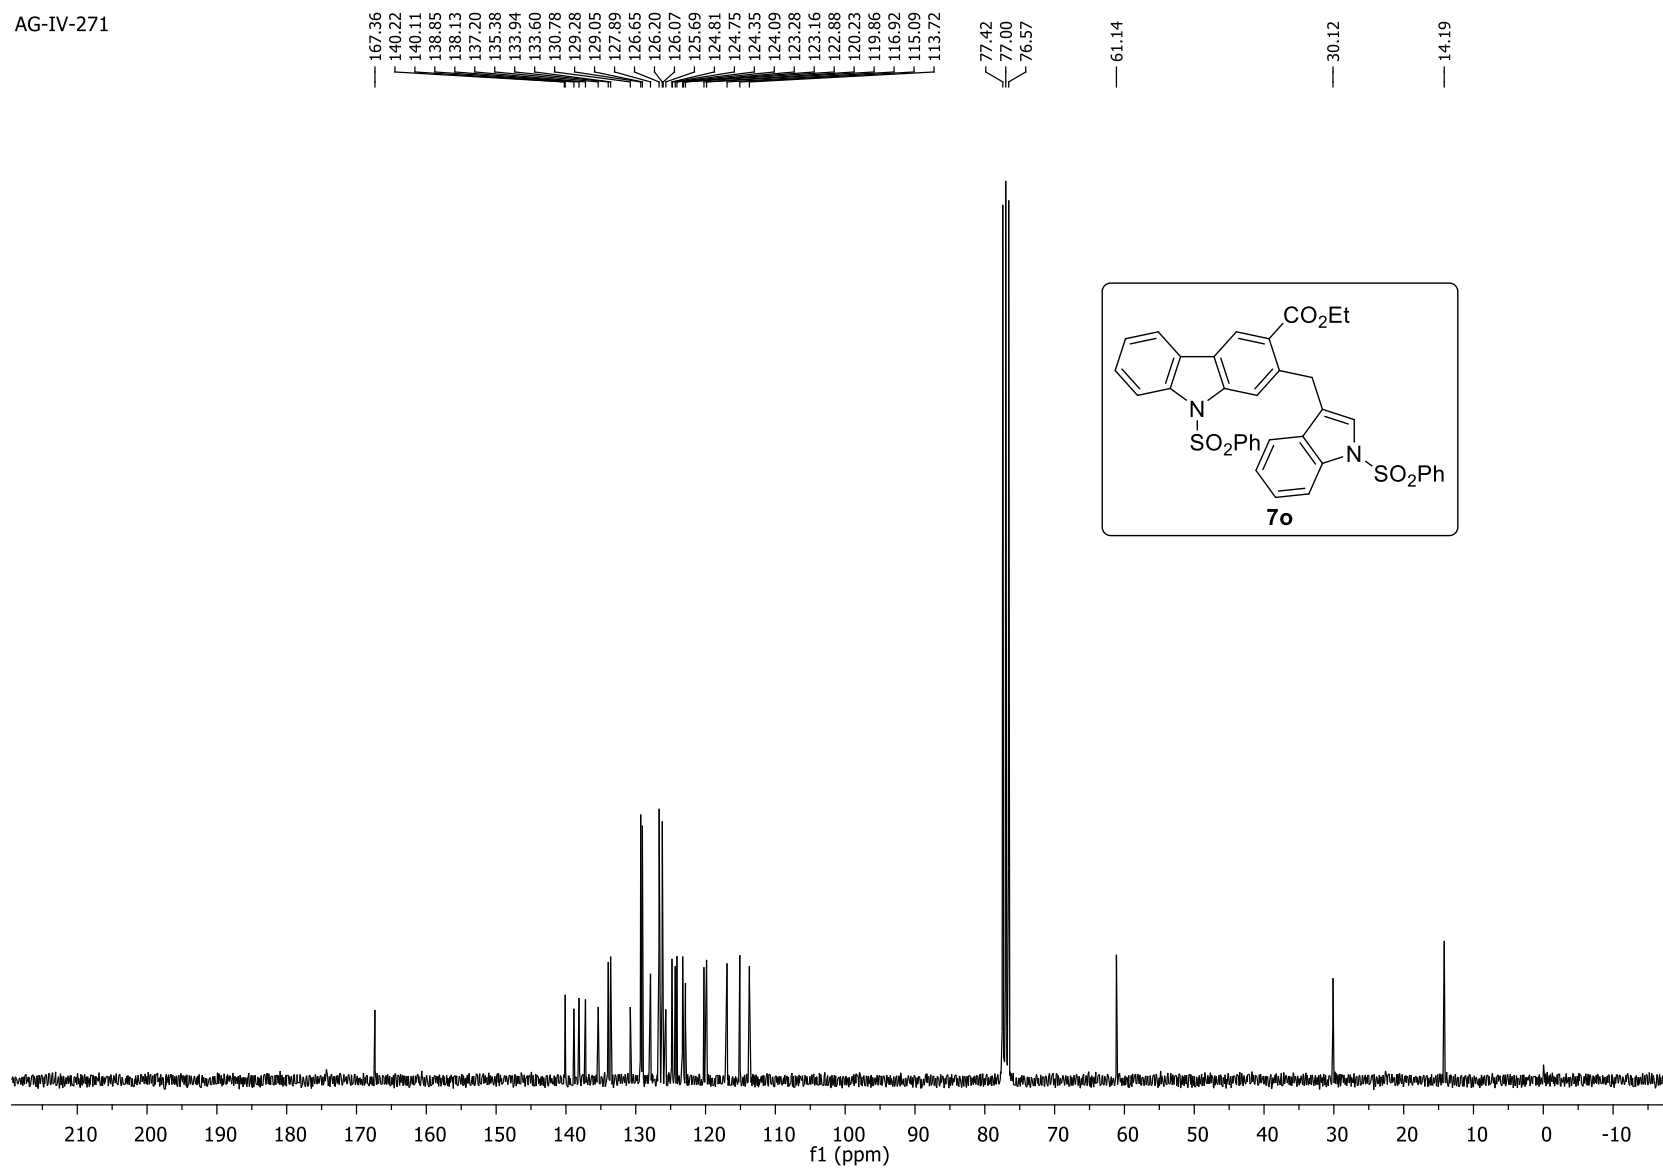

$^{13}\text{C} \{^1\text{H}\}$  NMR (75 MHz,  $\text{CDCl}_3$ ) spectrum of compound **7o**

AG-IV-271

133.99  
133.65  
129.33  
129.10  
127.93  
126.70  
126.24  
124.86  
124.40  
124.14  
123.32  
123.21  
120.28  
119.90  
116.97  
115.13  
113.76

61.20

30.17

14.24

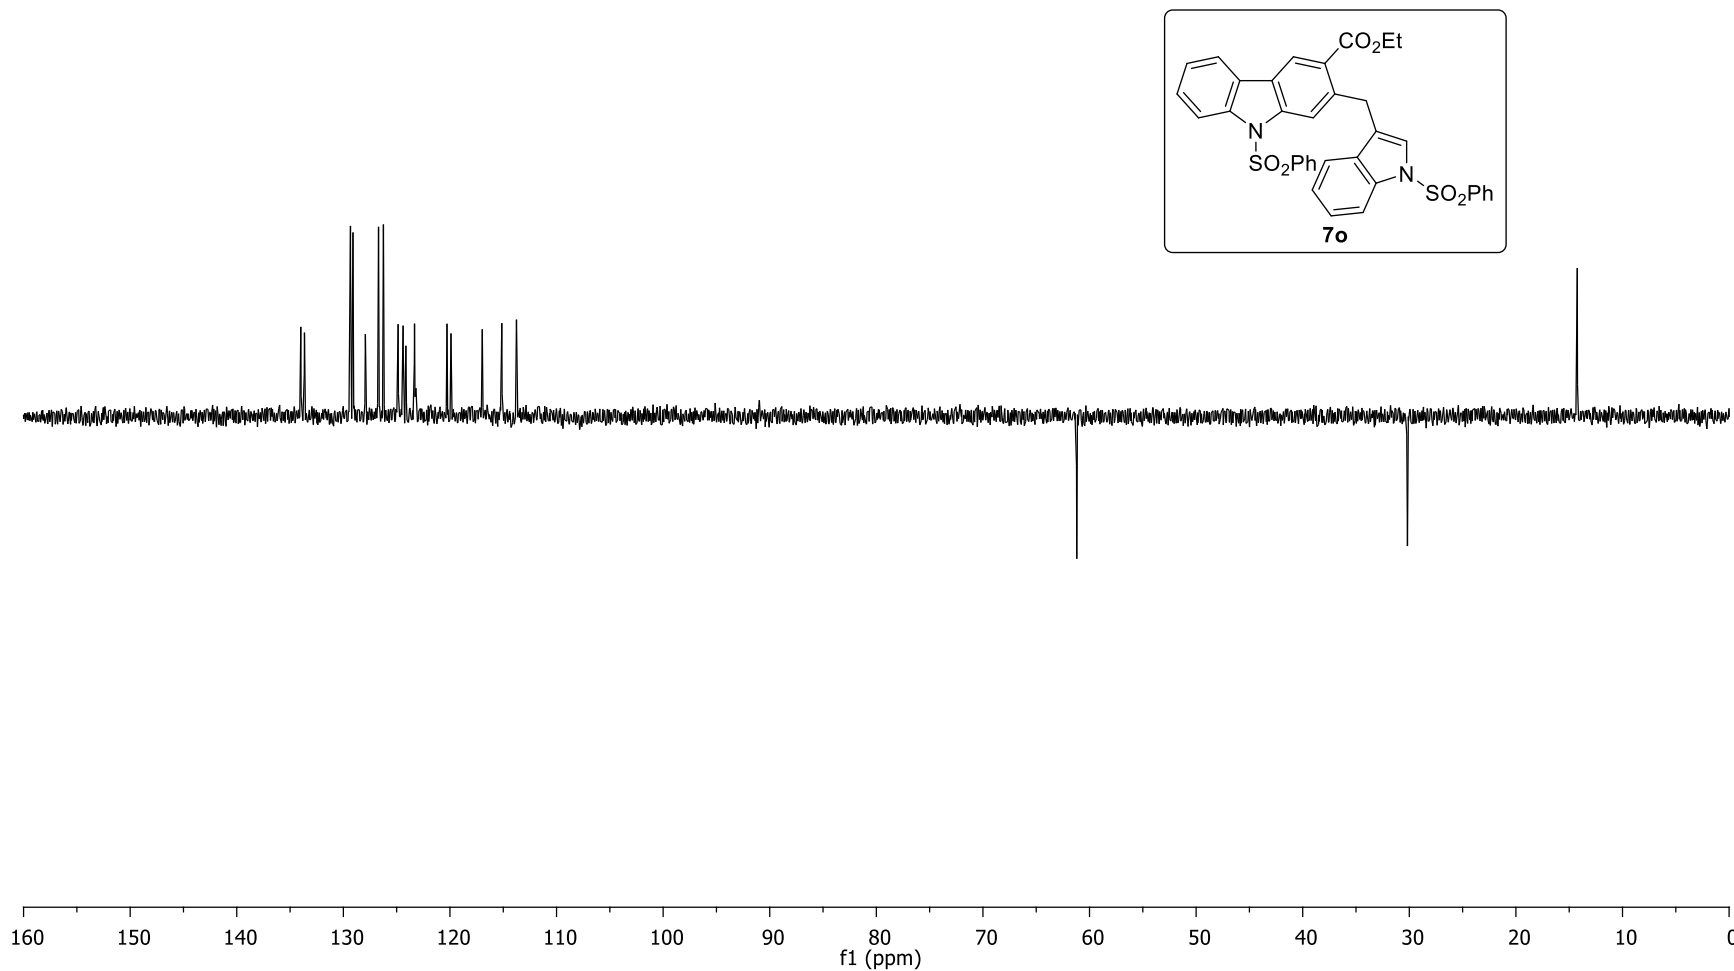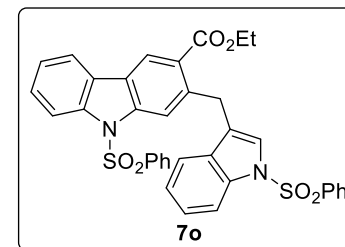

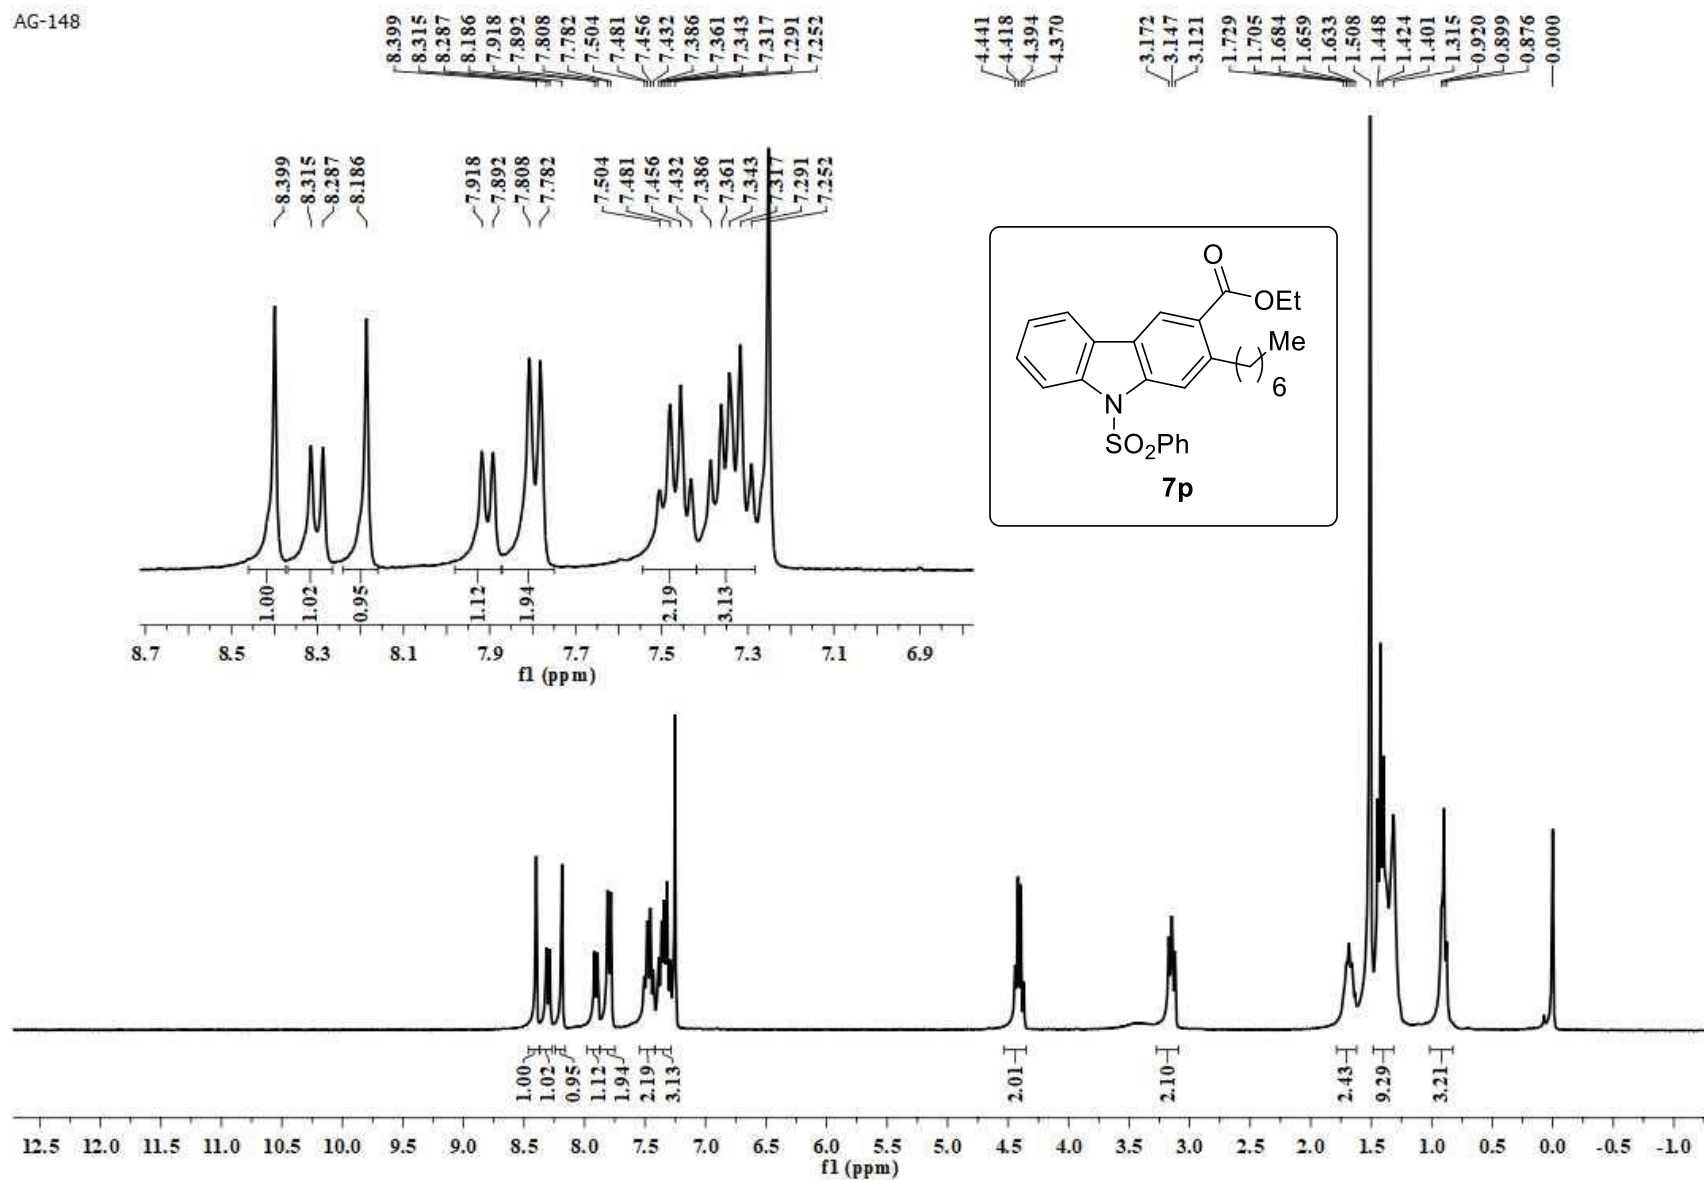

**<sup>1</sup>H NMR (300 MHz, CDCl<sub>3</sub>) spectrum of compound 7p**

AG-148-C13

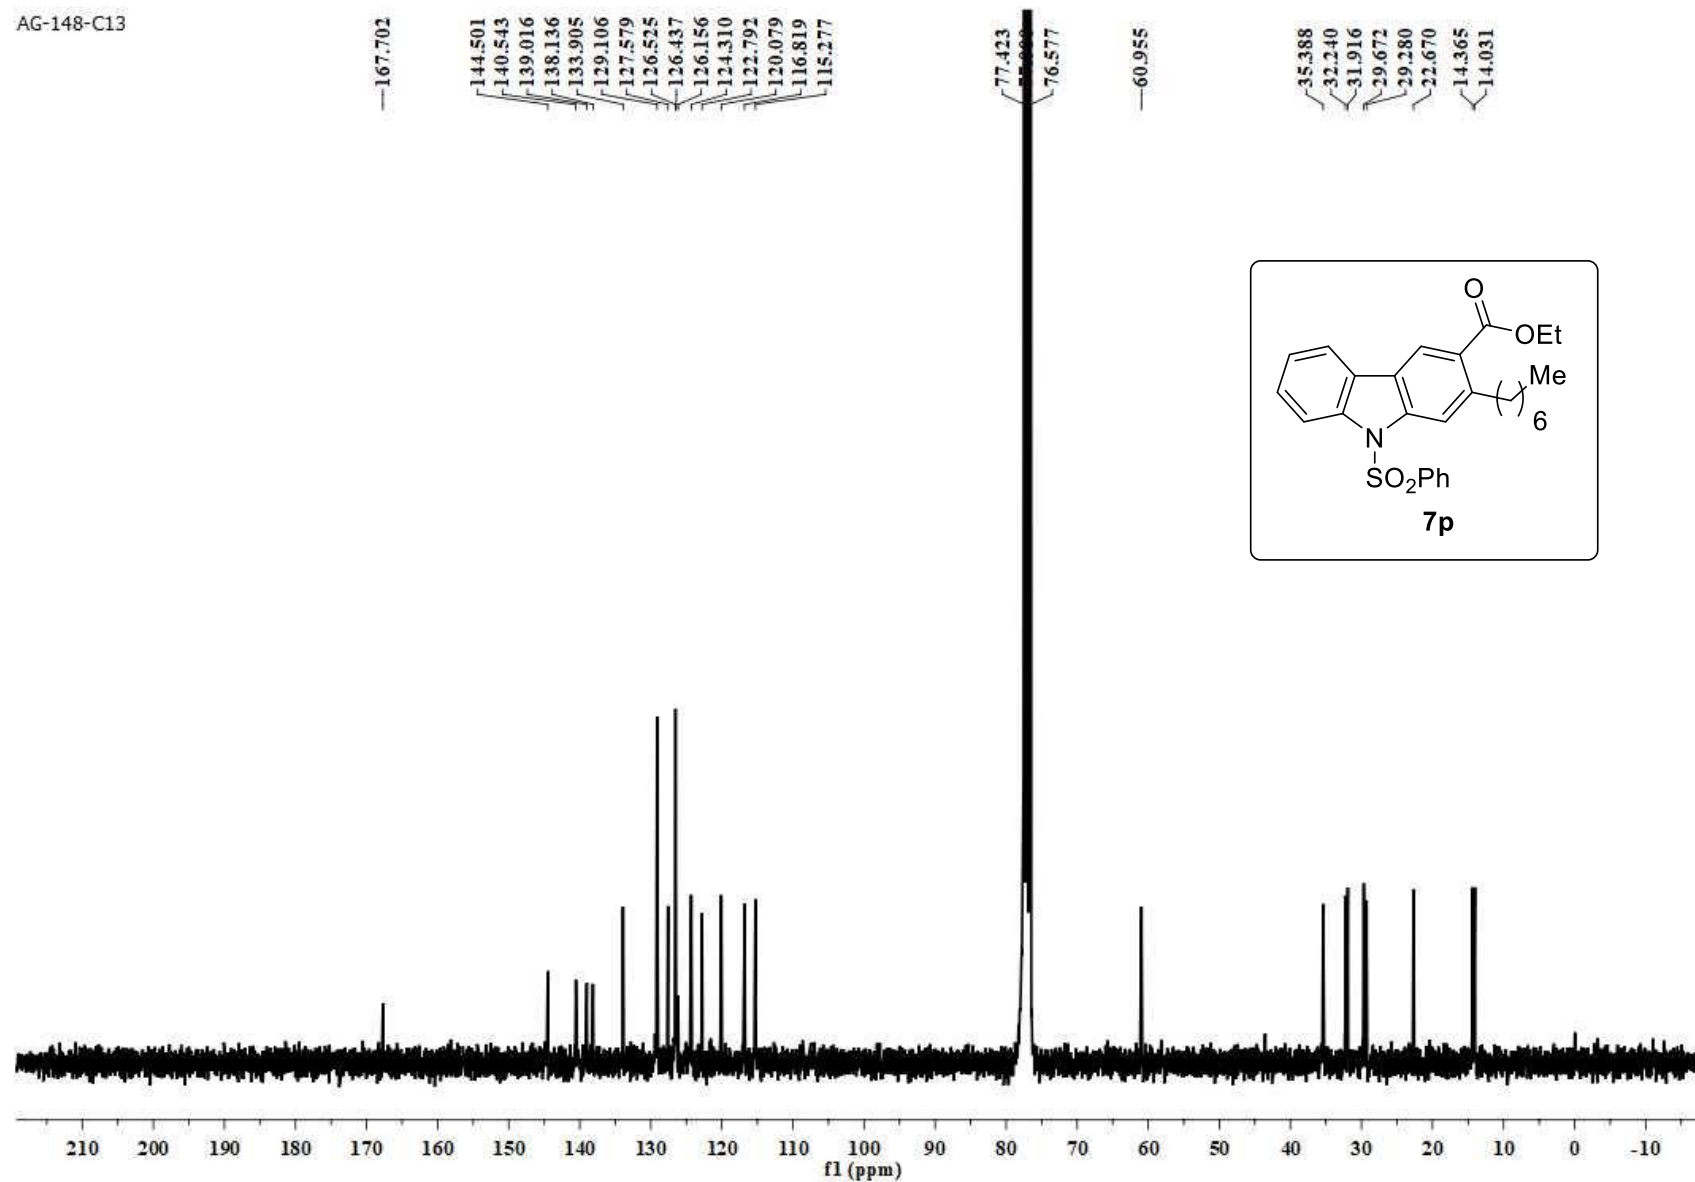

$^{13}\text{C}$   $\{^1\text{H}\}$  NMR (75 MHz,  $\text{CDCl}_3$ ) spectrum of compound **7p**

AG-822

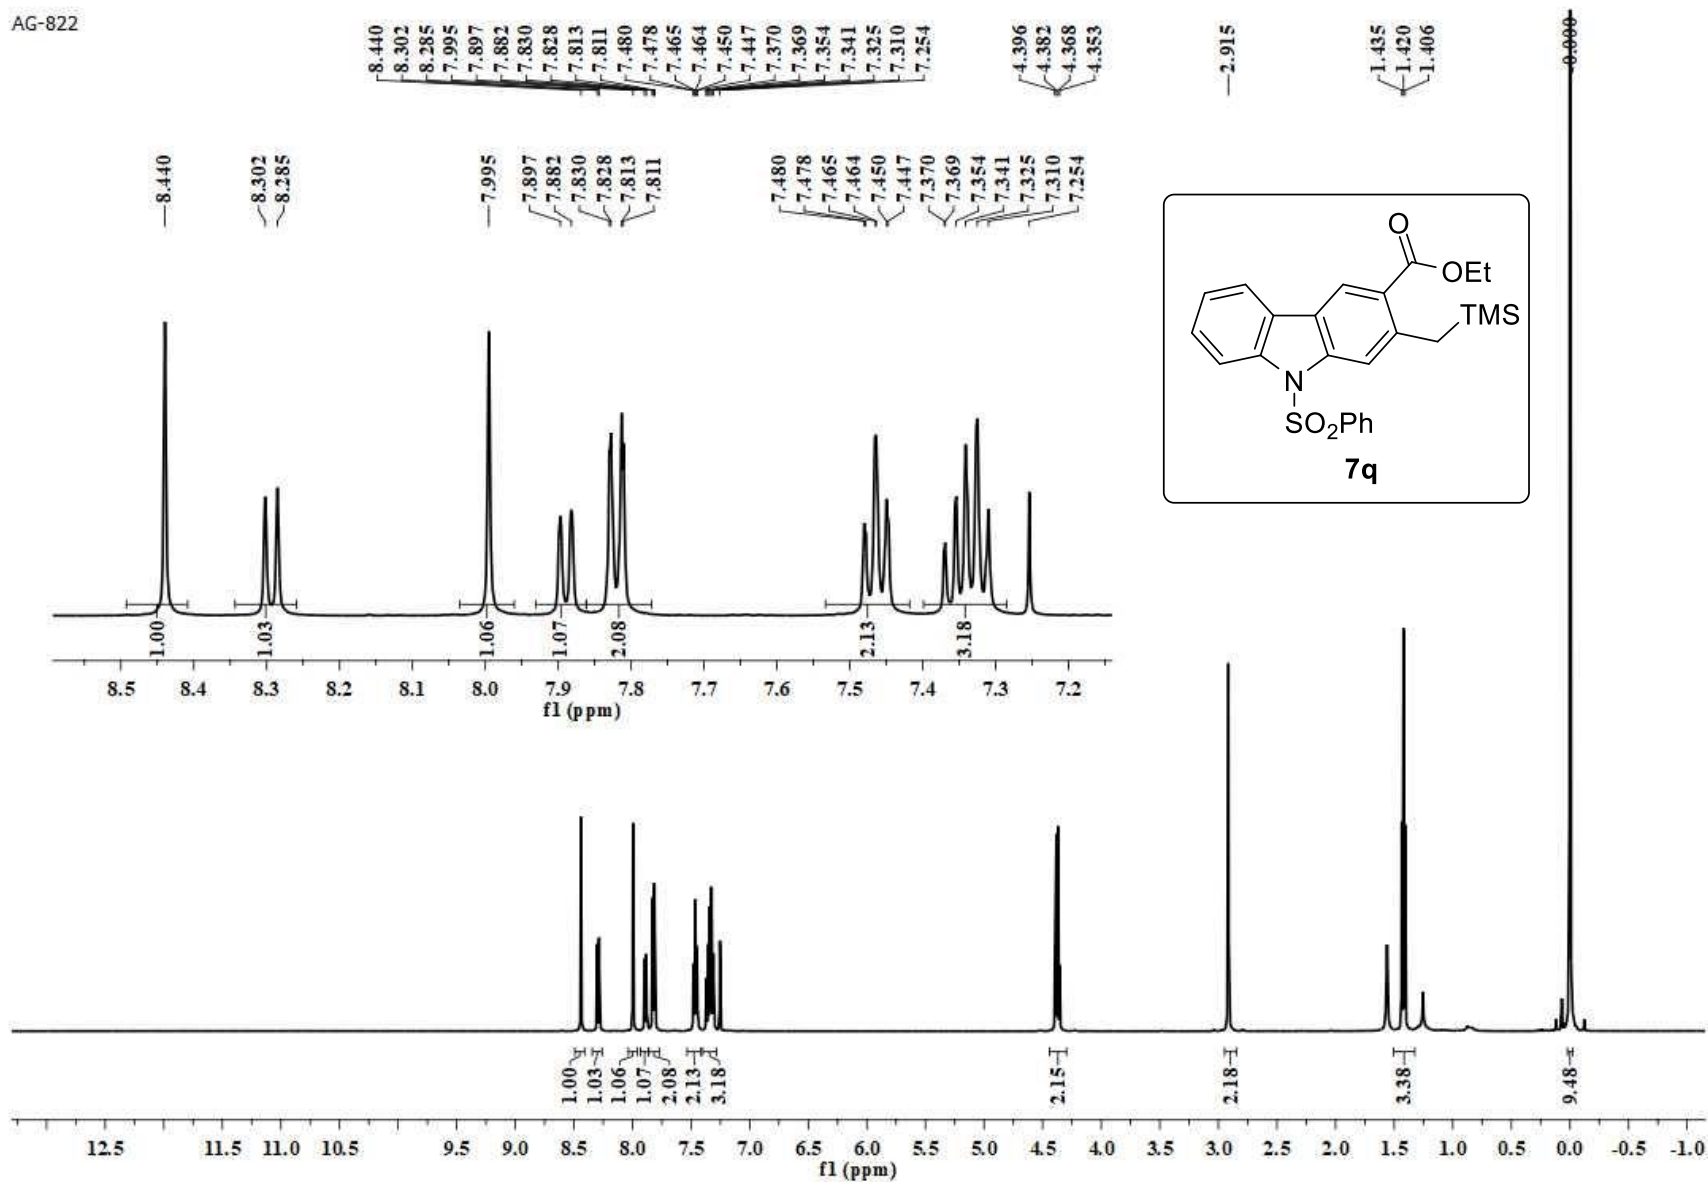

**<sup>1</sup>H NMR (500 MHz, CDCl<sub>3</sub>) spectrum of compound 7q**

AG-822

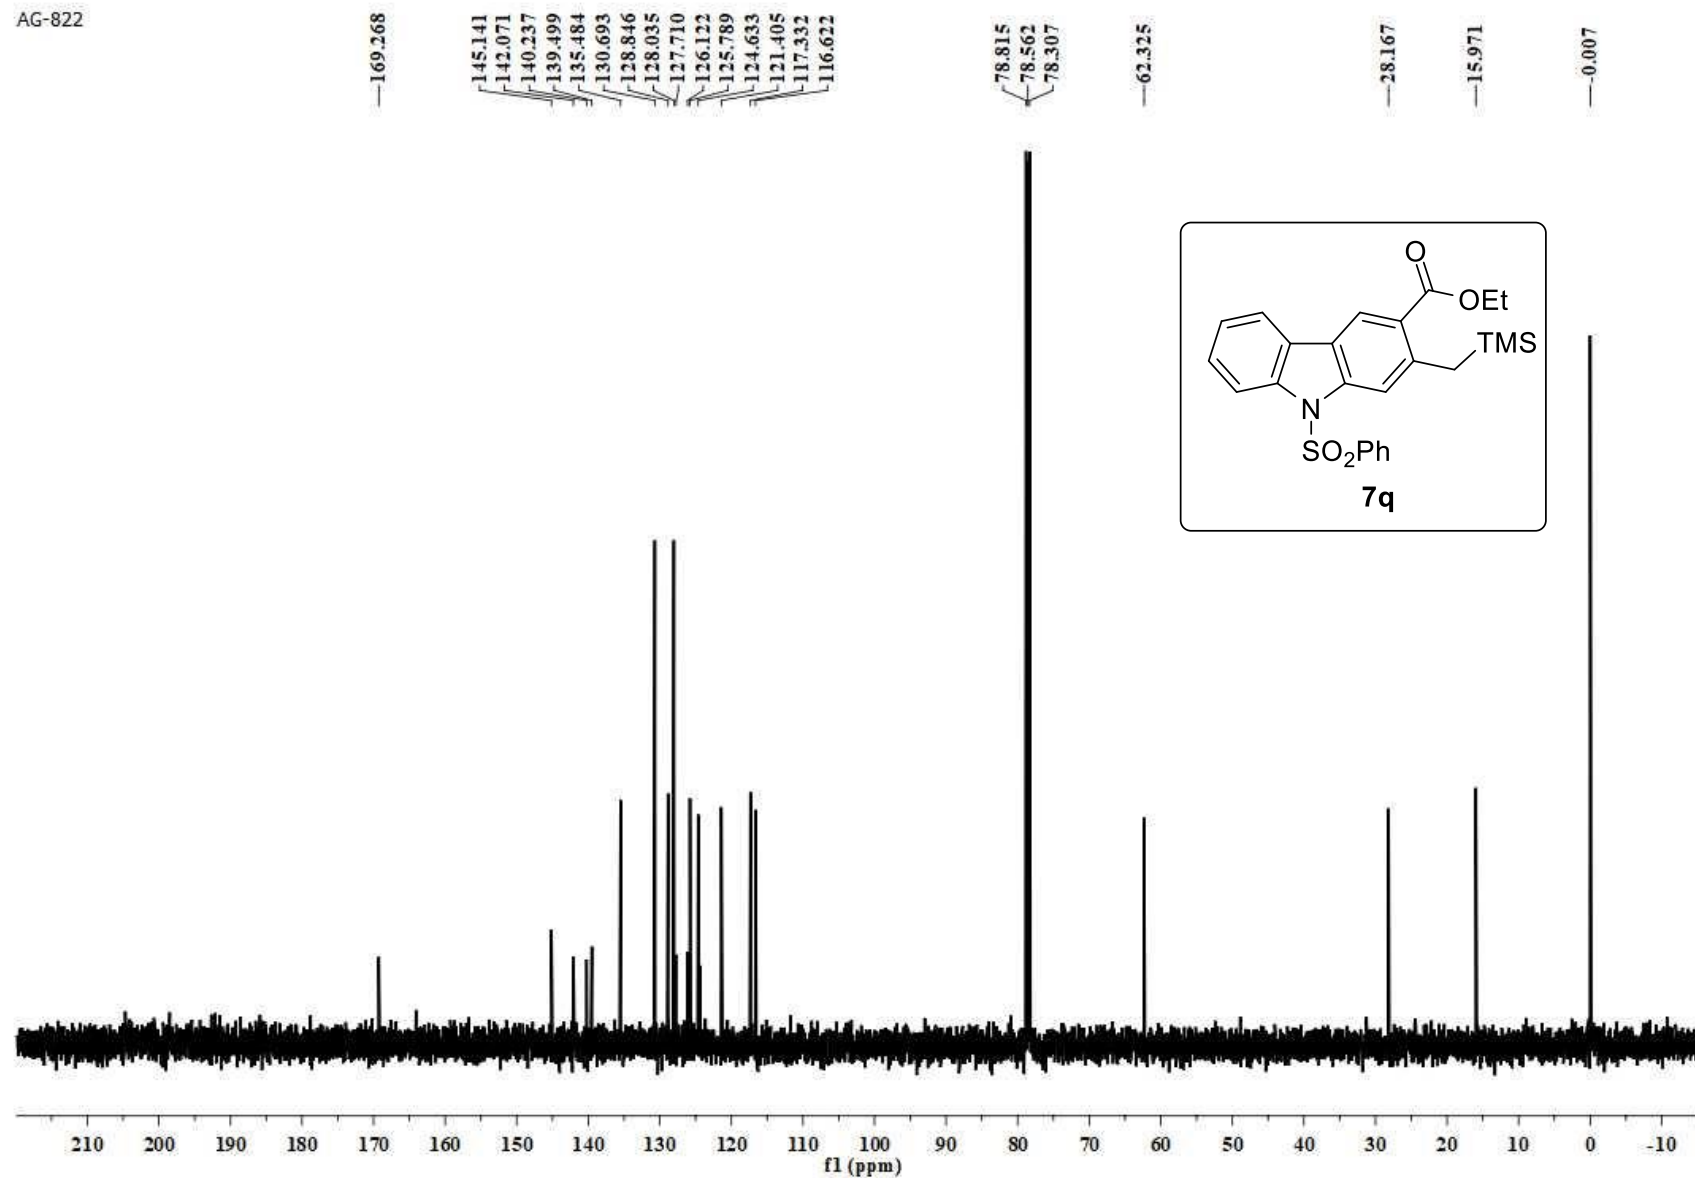

$^{13}\text{C} \{^1\text{H}\}$  NMR (125 MHz,  $\text{CDCl}_3$ ) spectrum of compound **7q**

AG-822

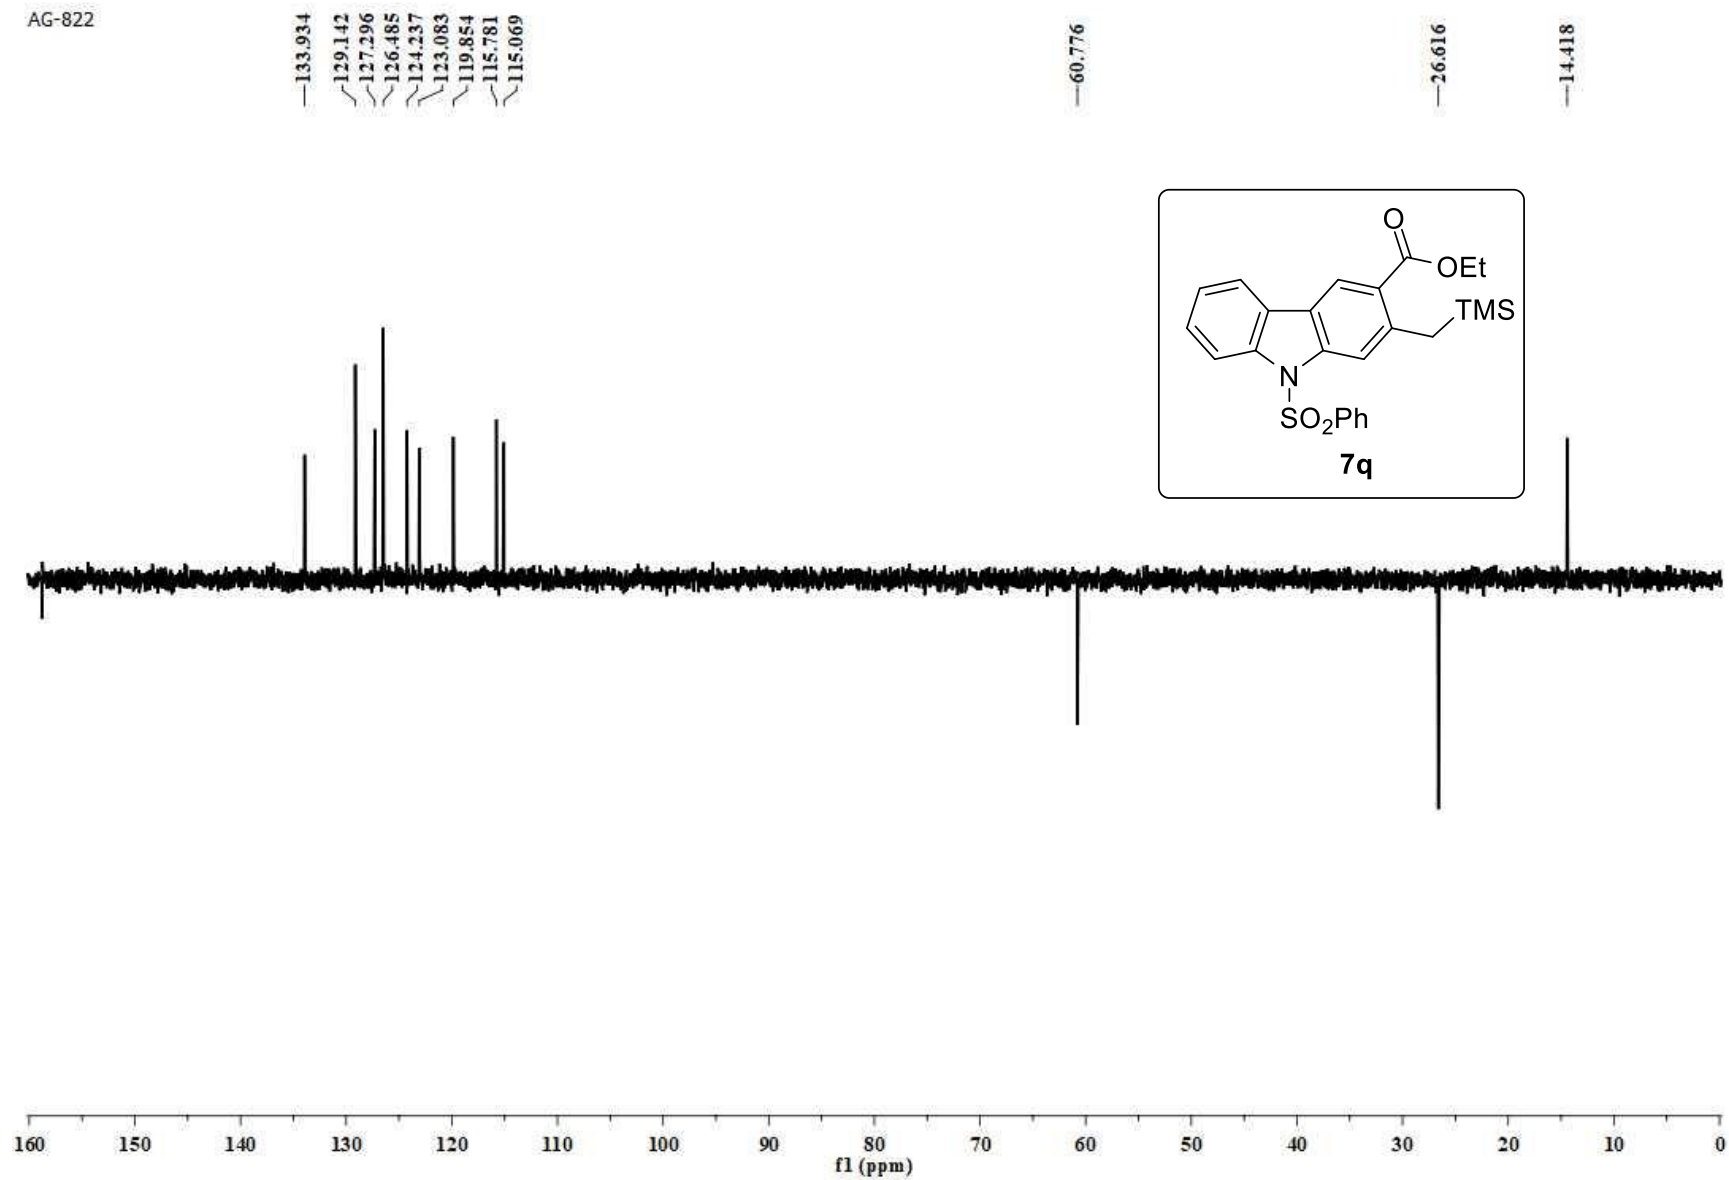

DEPT-135 NMR (125 MHz, CDCl<sub>3</sub>) spectrum of compound **7q**



AG-131A

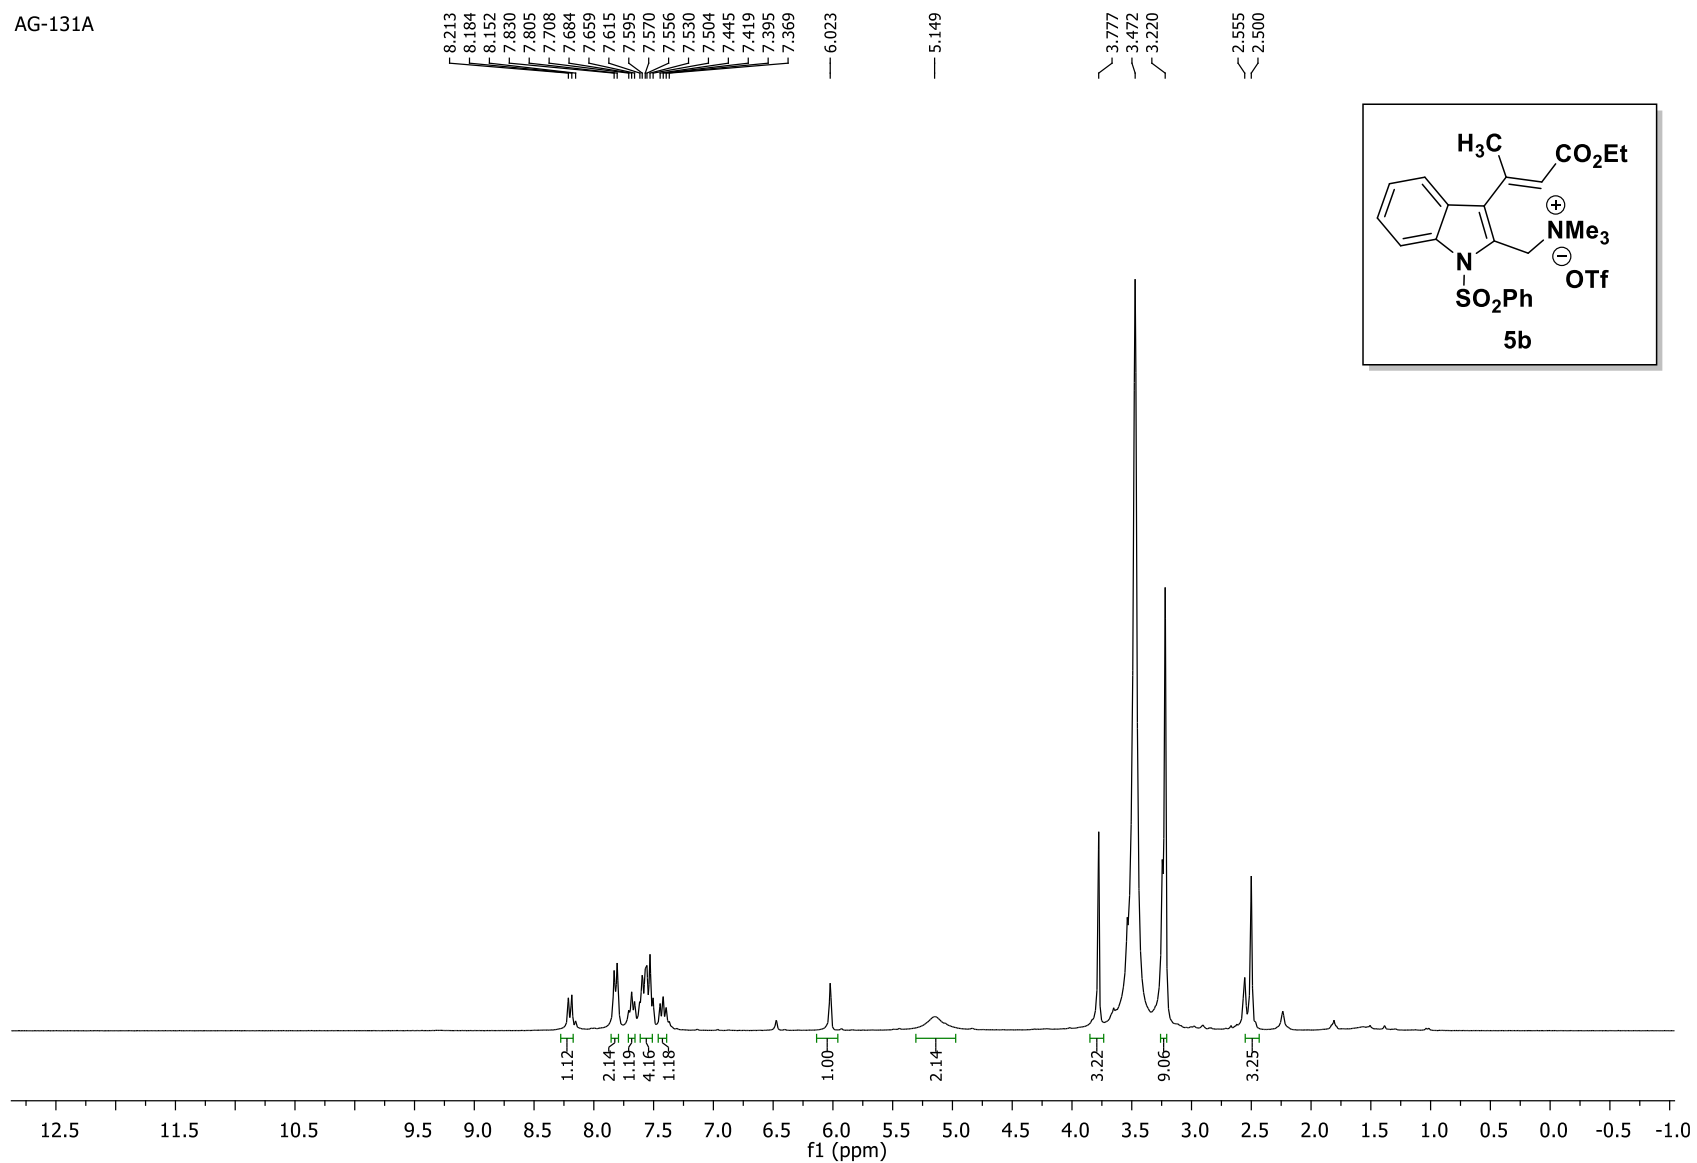

$^1\text{H}$  NMR (300 MHz,  $\text{DMSO}-d_6$ ) spectrum of compound **5b**

AG-131A

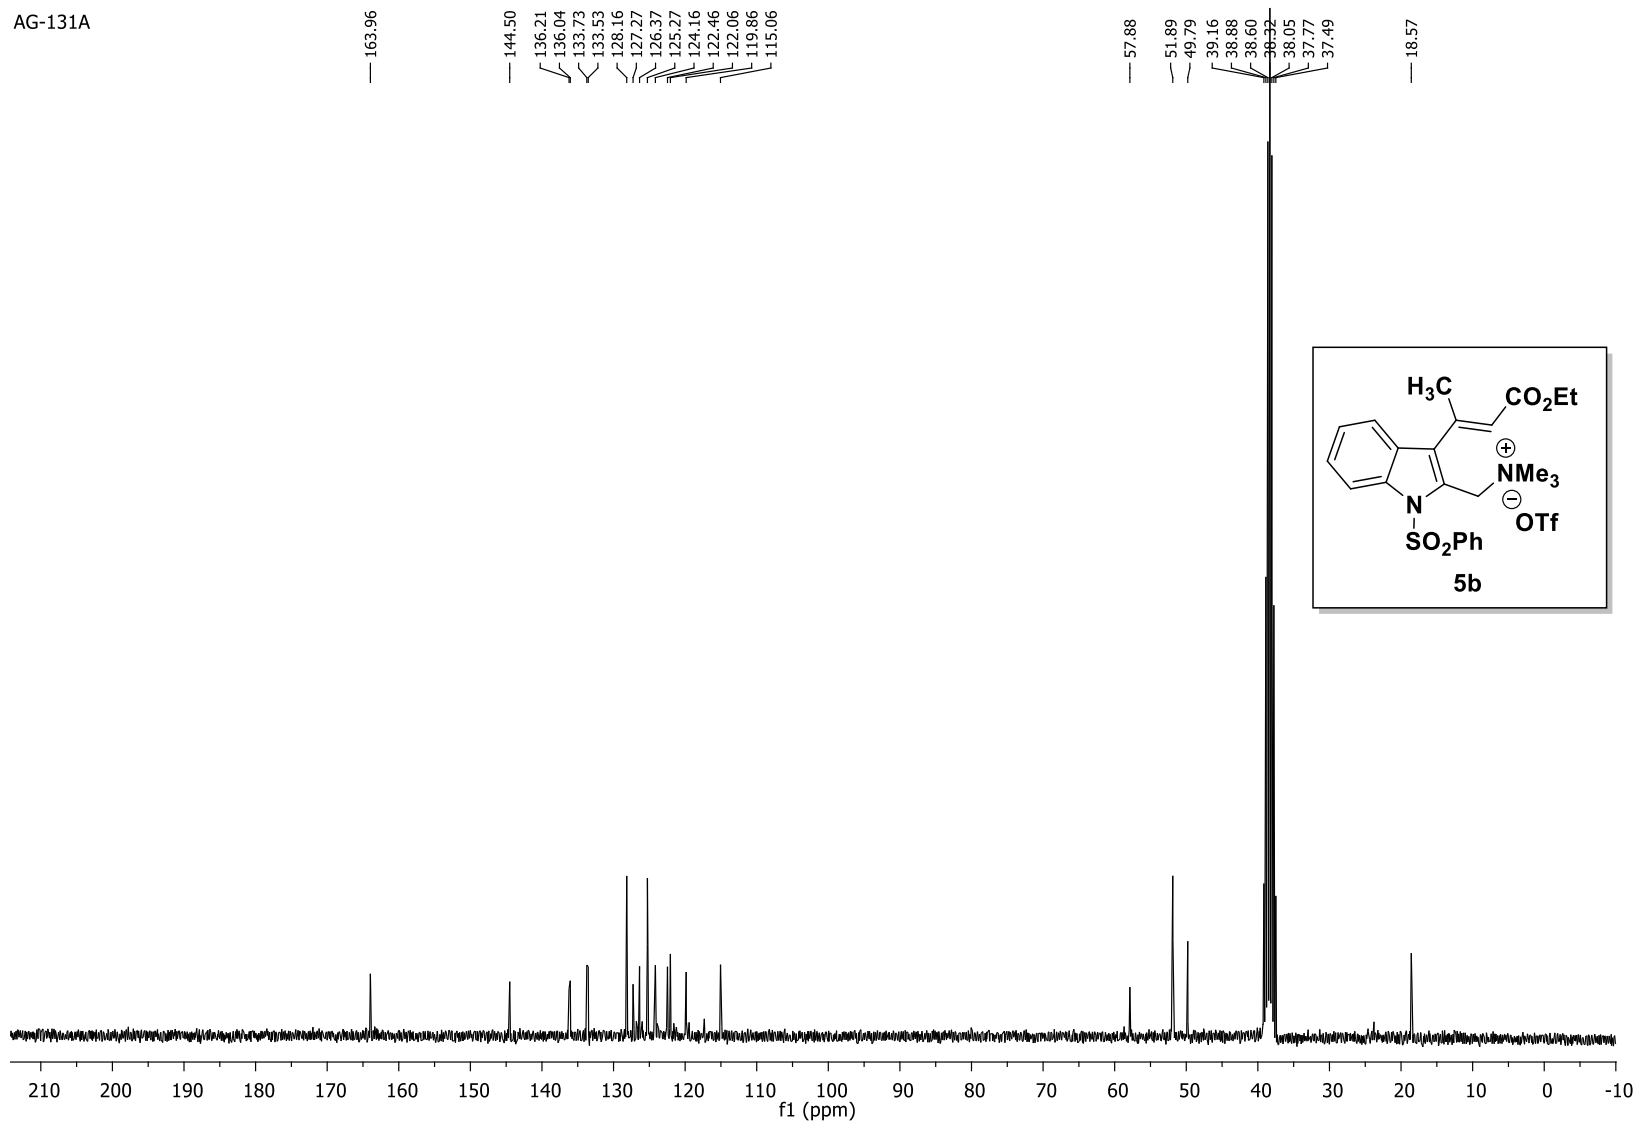

$^{13}\text{C} \{^1\text{H}\}$  NMR (75 MHz,  $\text{DMSO-}d_6$ ) spectrum of compound **5b**

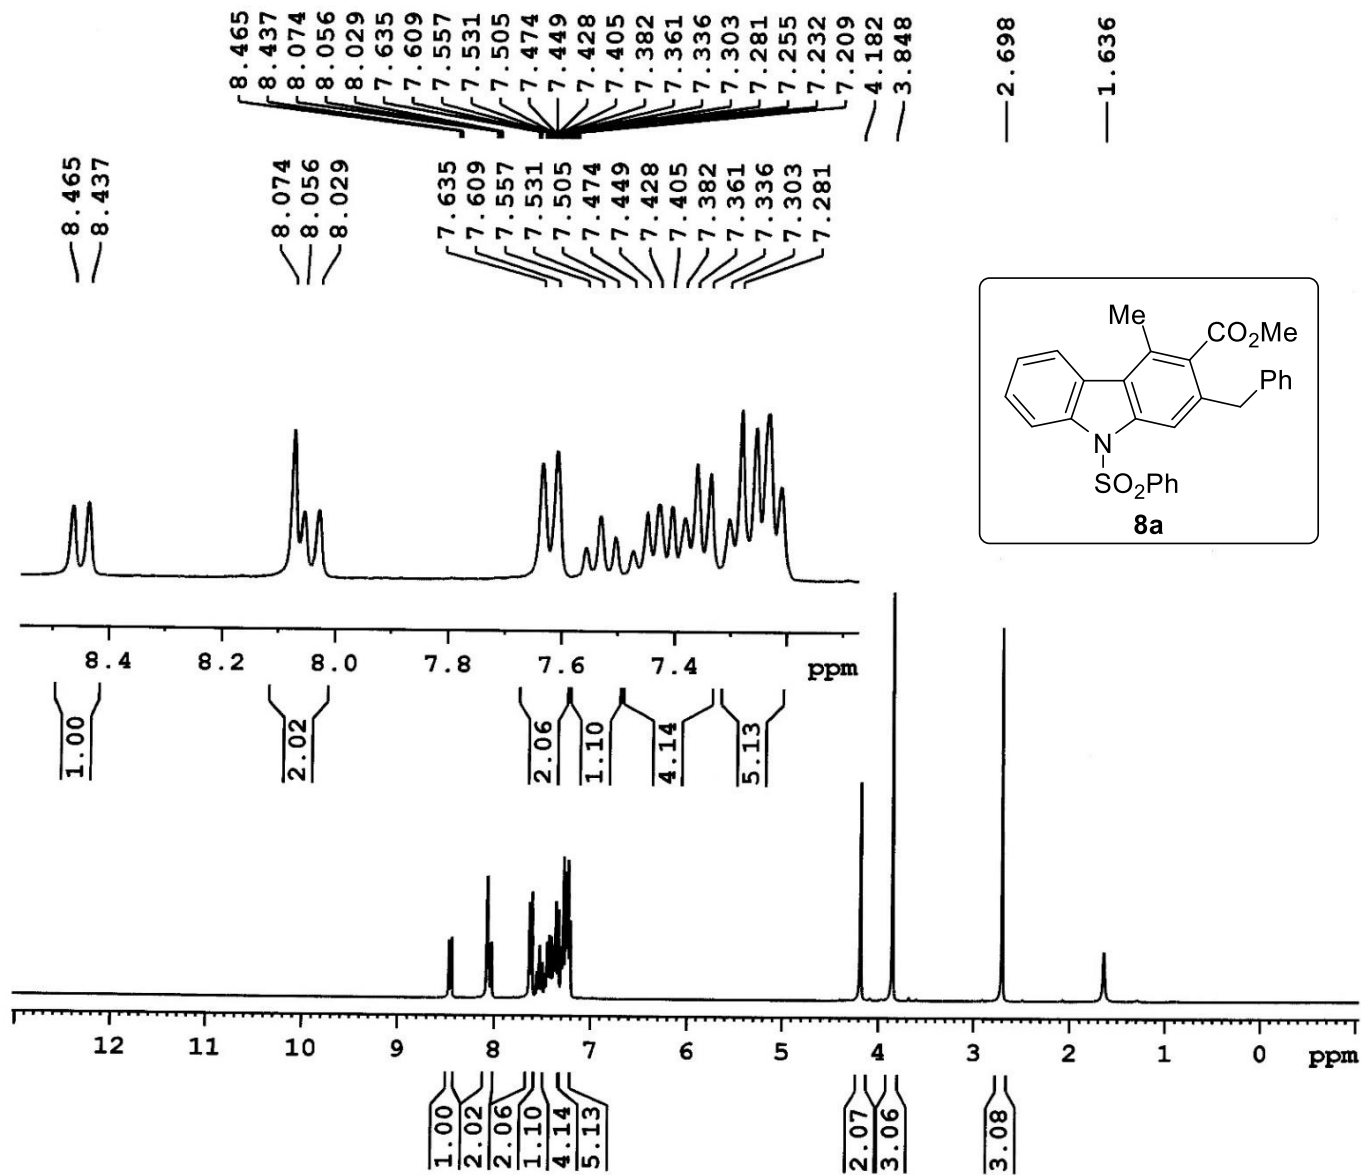

<sup>1</sup>H NMR (300 MHz, CDCl<sub>3</sub>) spectrum of compound **8a**

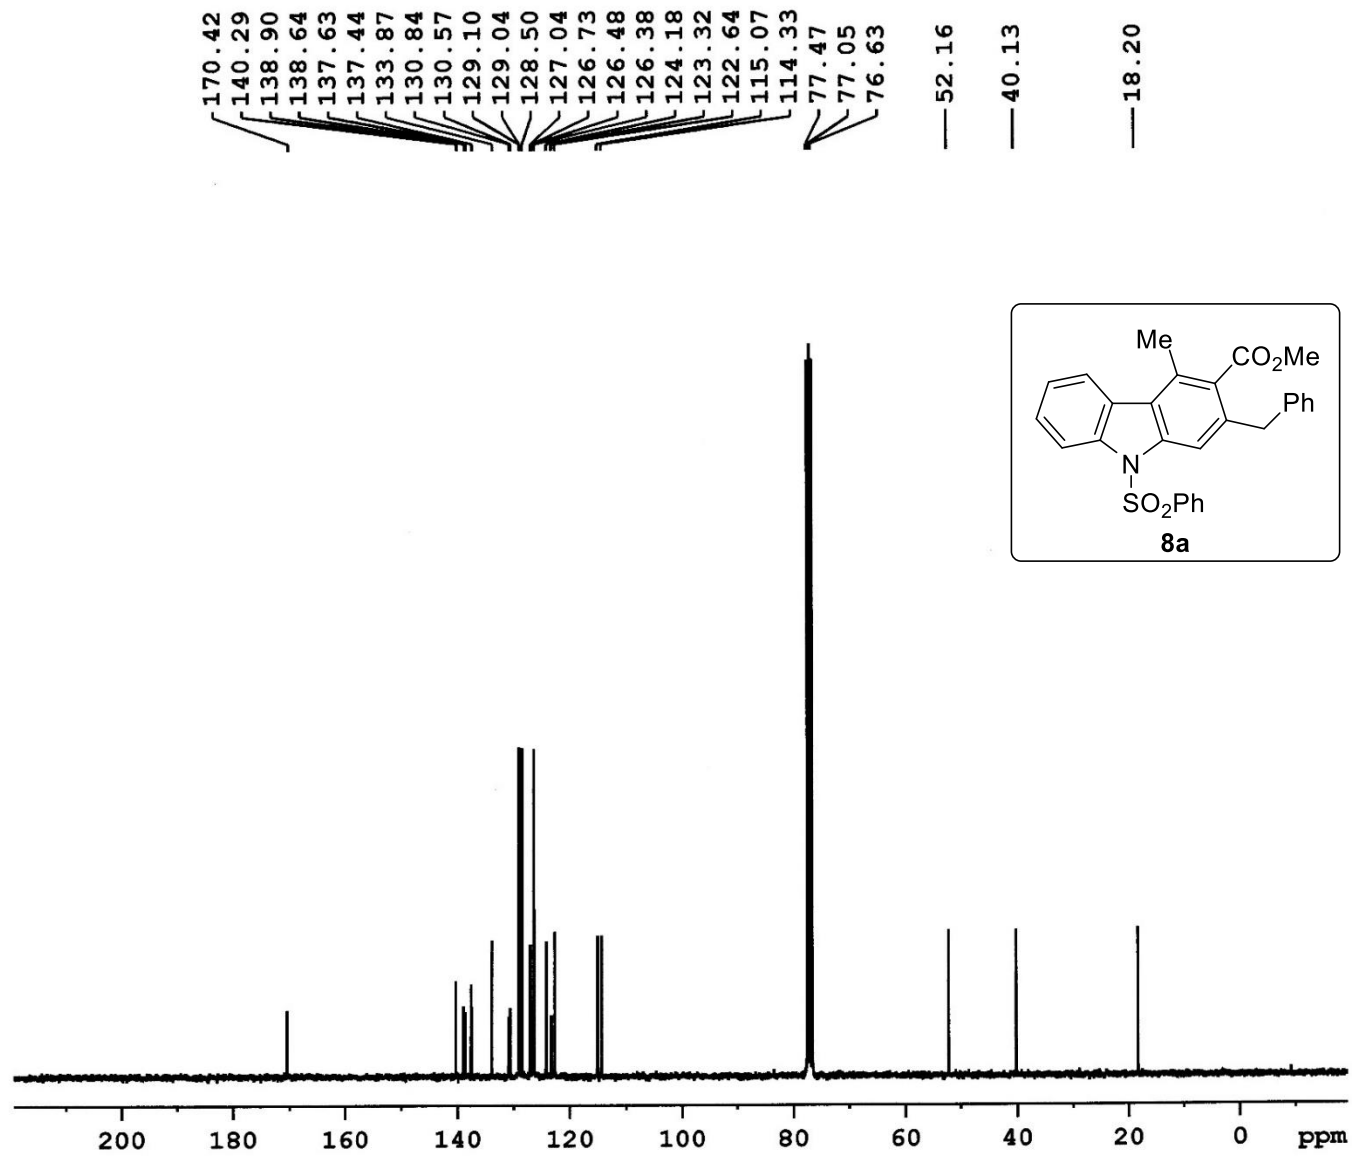

<sup>13</sup>C {<sup>1</sup>H} NMR (75 MHz, CDCl<sub>3</sub>) spectrum of compound **8a**

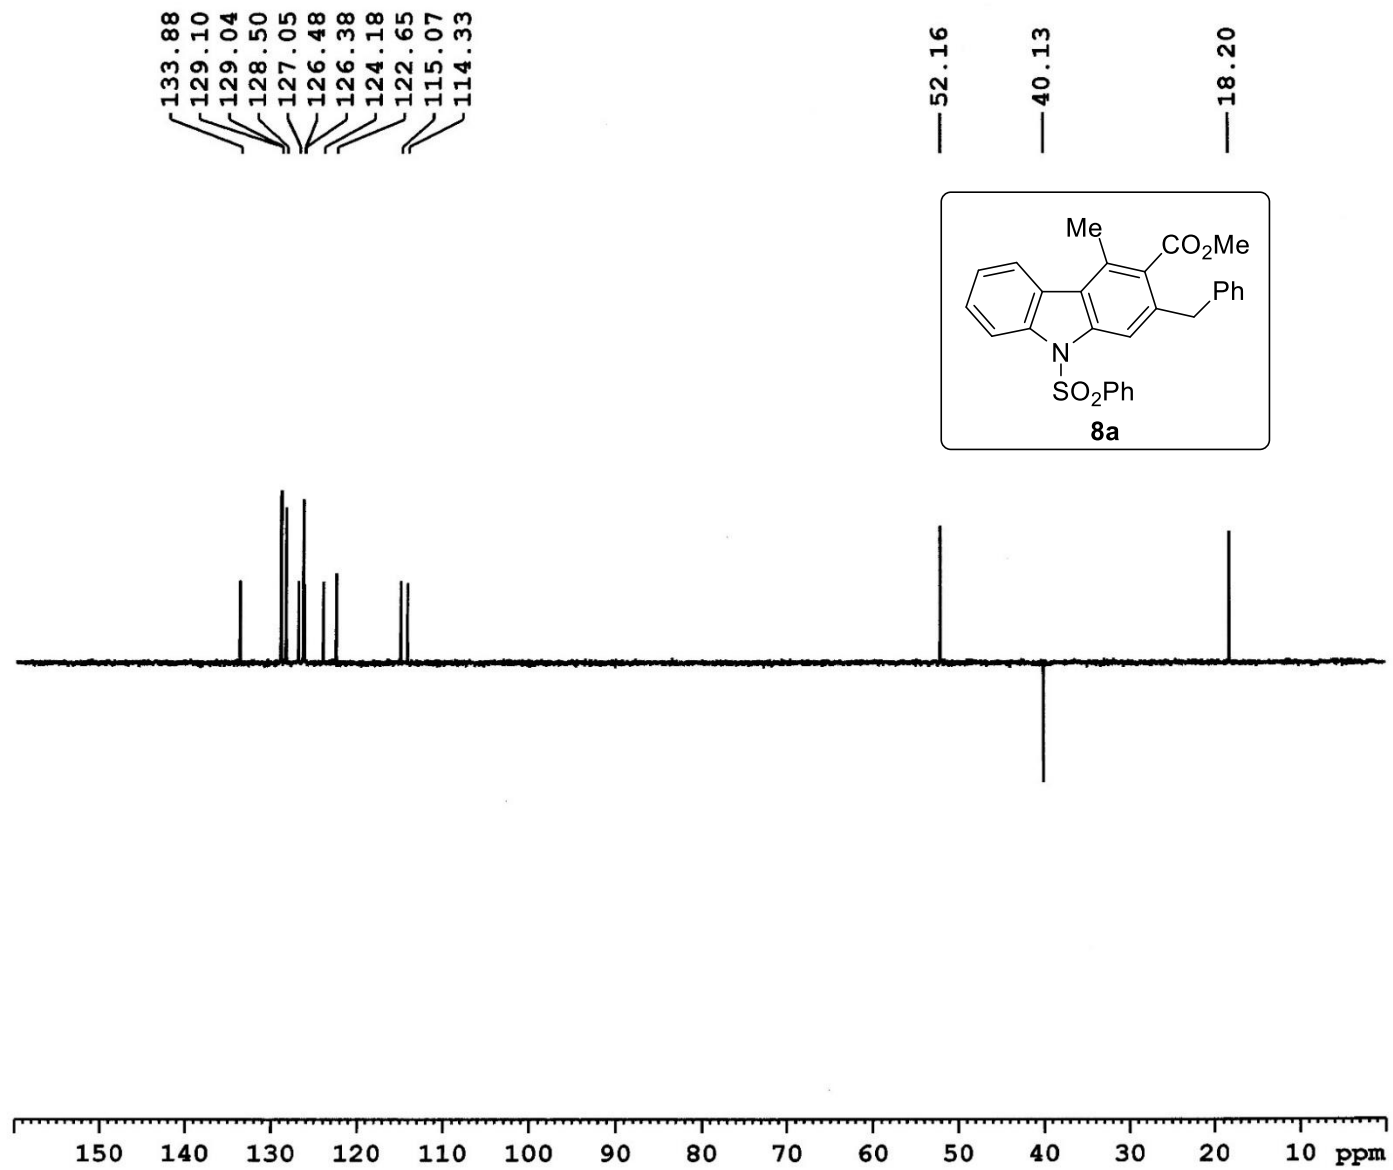

DEPT-135 NMR (75 MHz, CDCl<sub>3</sub>) spectrum of compound **8a**

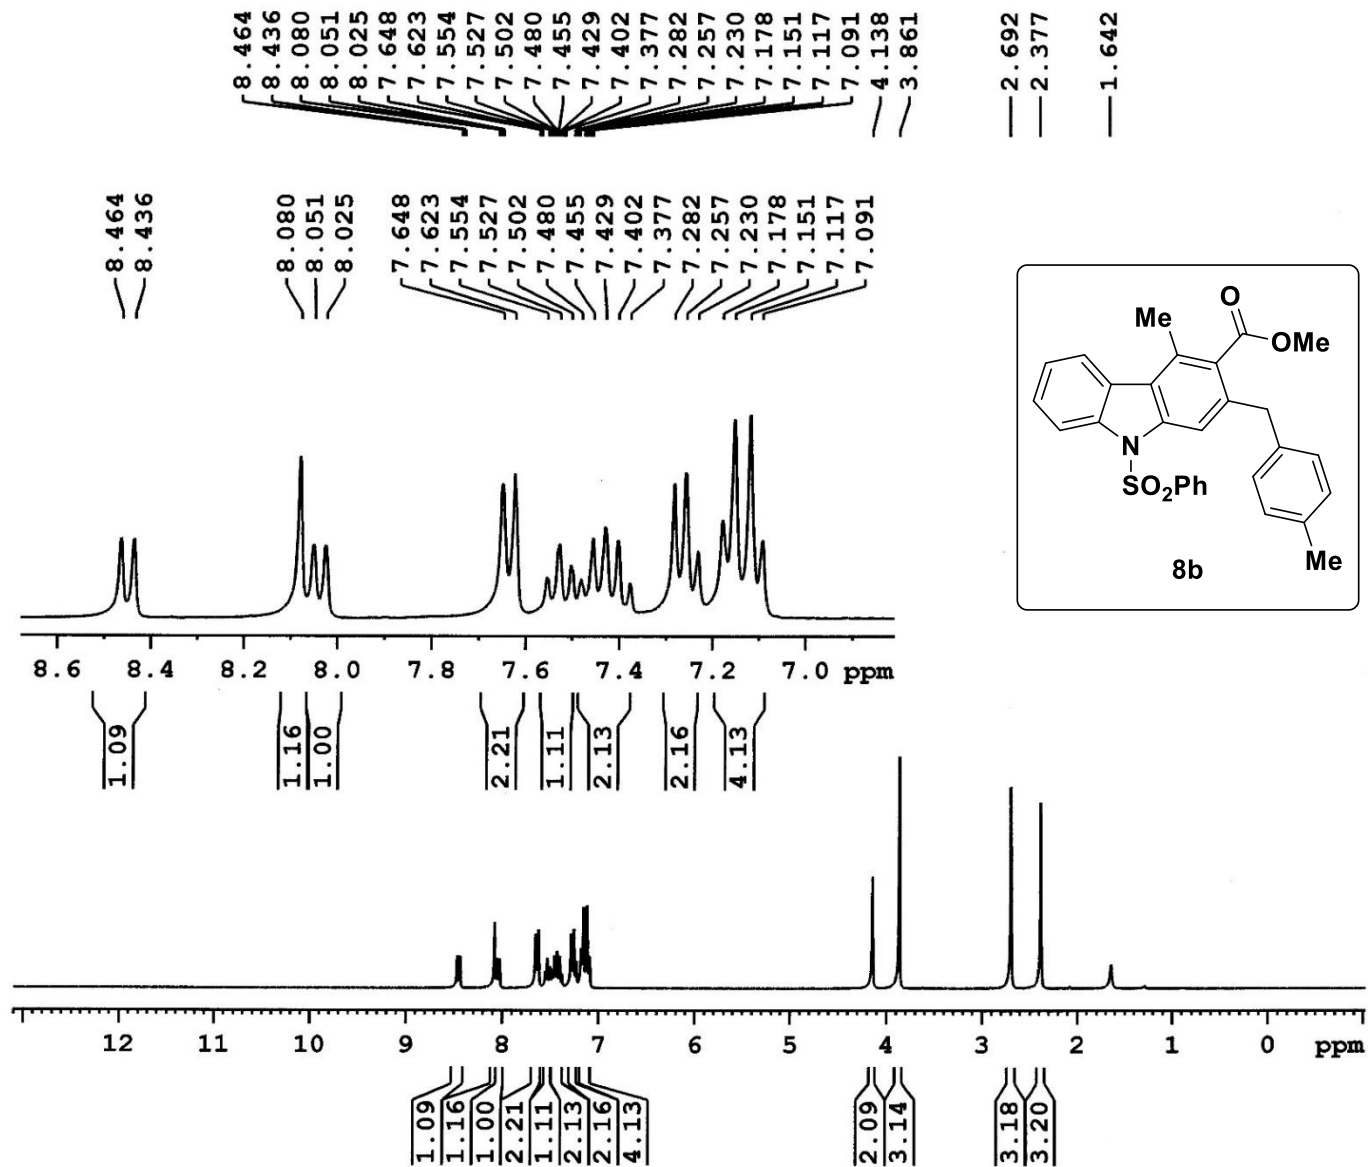

<sup>1</sup>H NMR (300 MHz, CDCl<sub>3</sub>) spectrum of compound **8b**

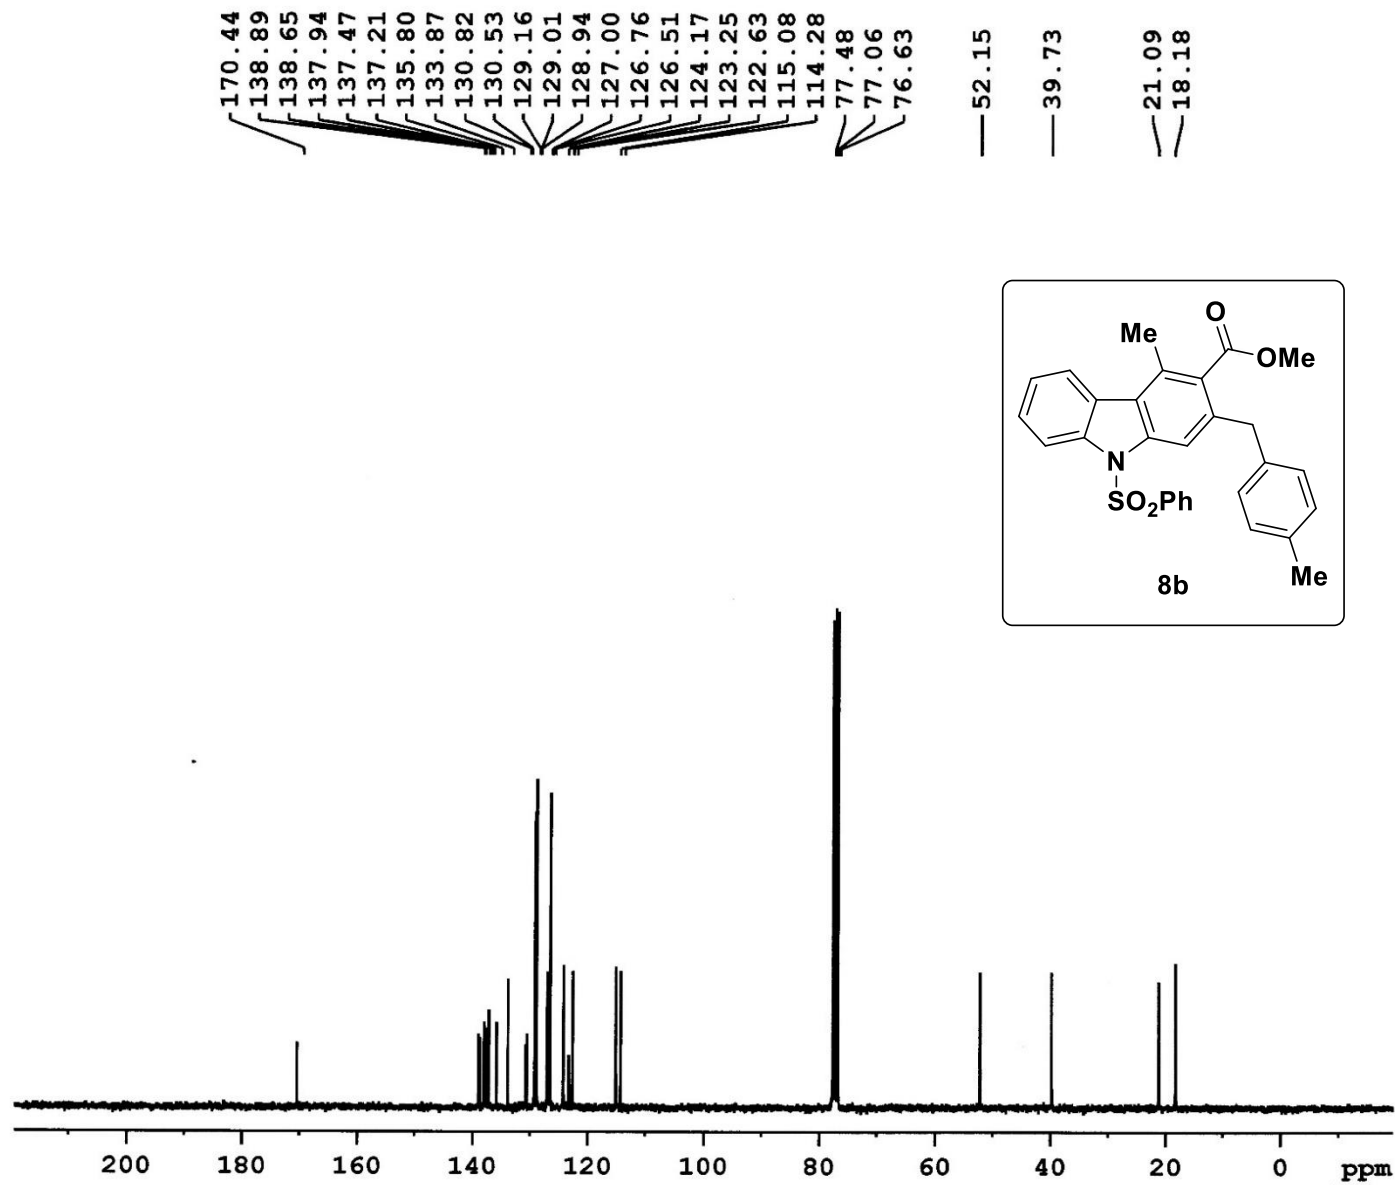

$^{13}\text{C}$   $\{^1\text{H}\}$  NMR (75 MHz,  $\text{CDCl}_3$ ) spectrum of compound **8b**

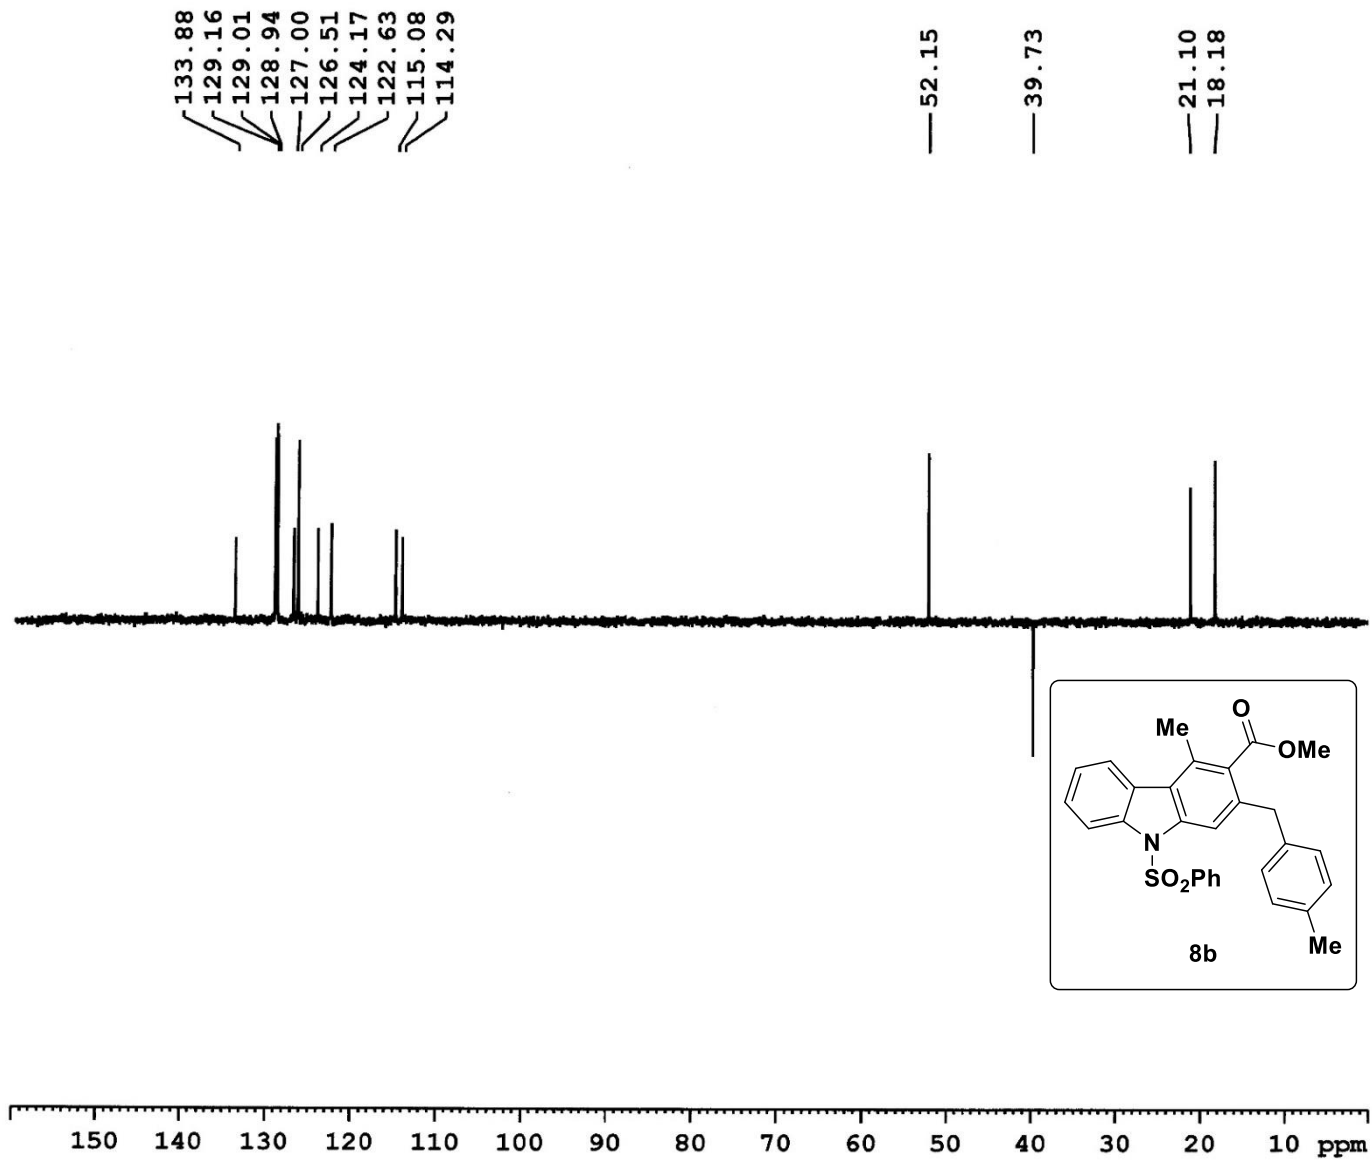

DEPT-135 NMR (75 MHz, CDCl<sub>3</sub>) spectrum of compound **8b**



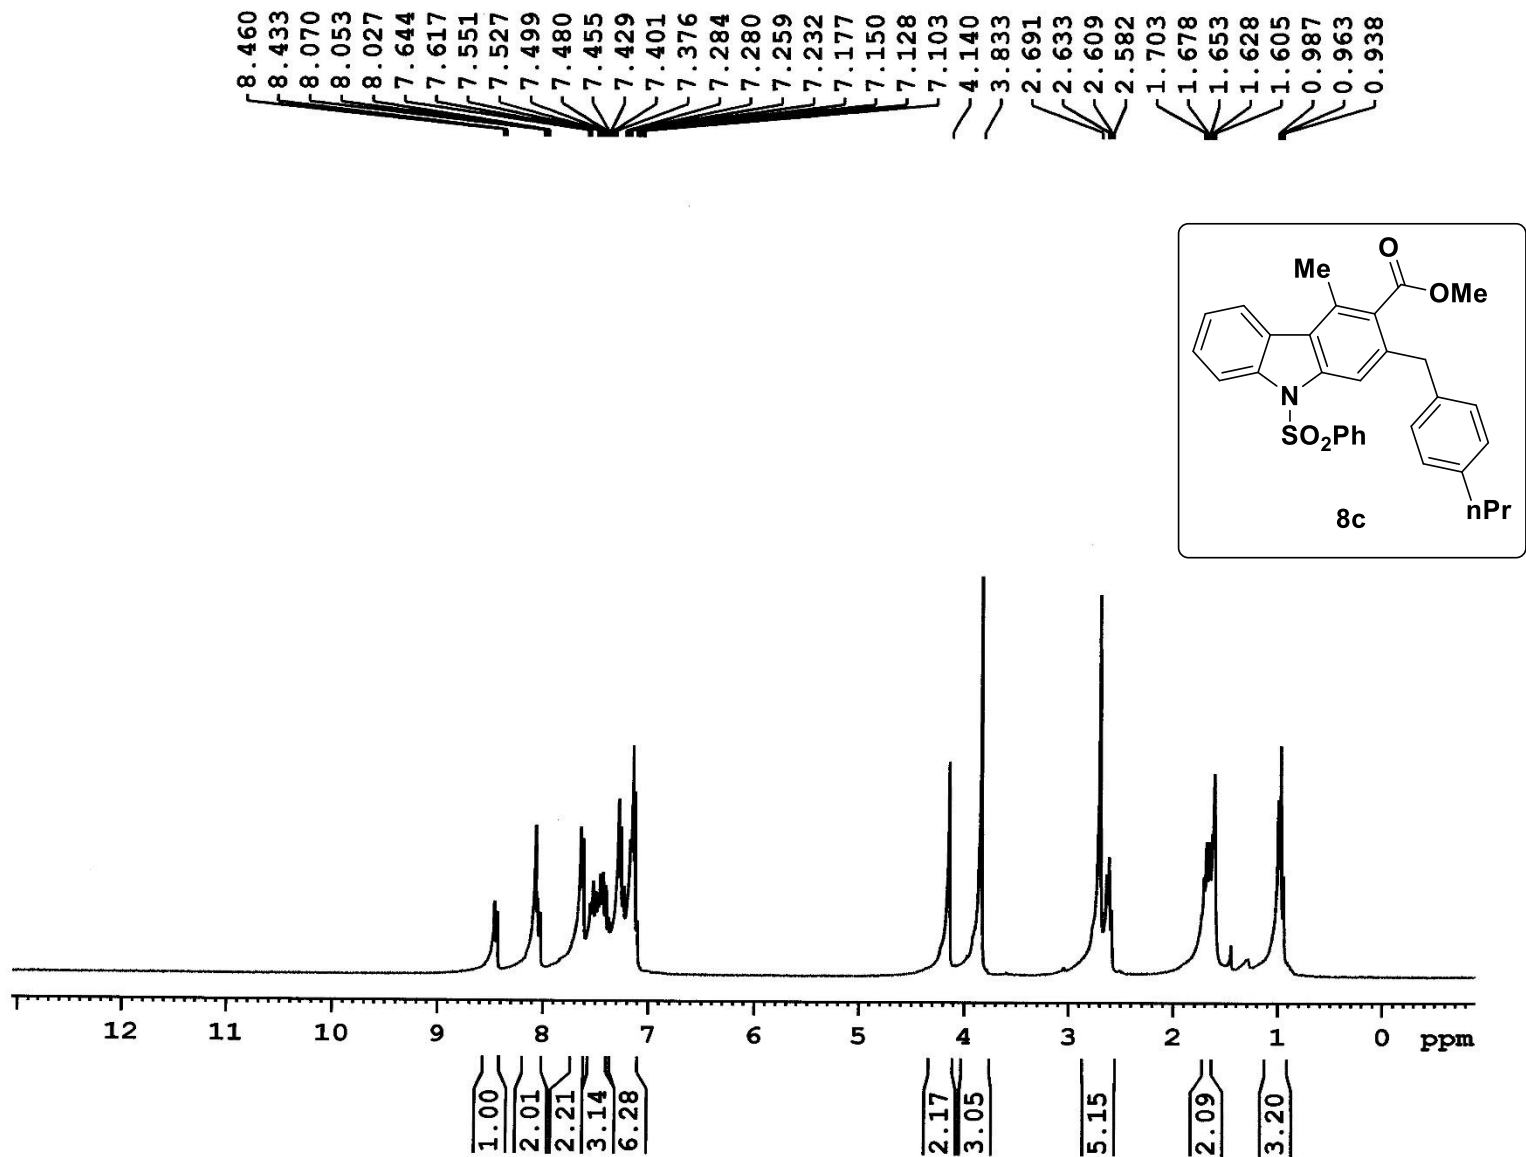

<sup>1</sup>H NMR (300 MHz, CDCl<sub>3</sub>) spectrum of compound **8c**

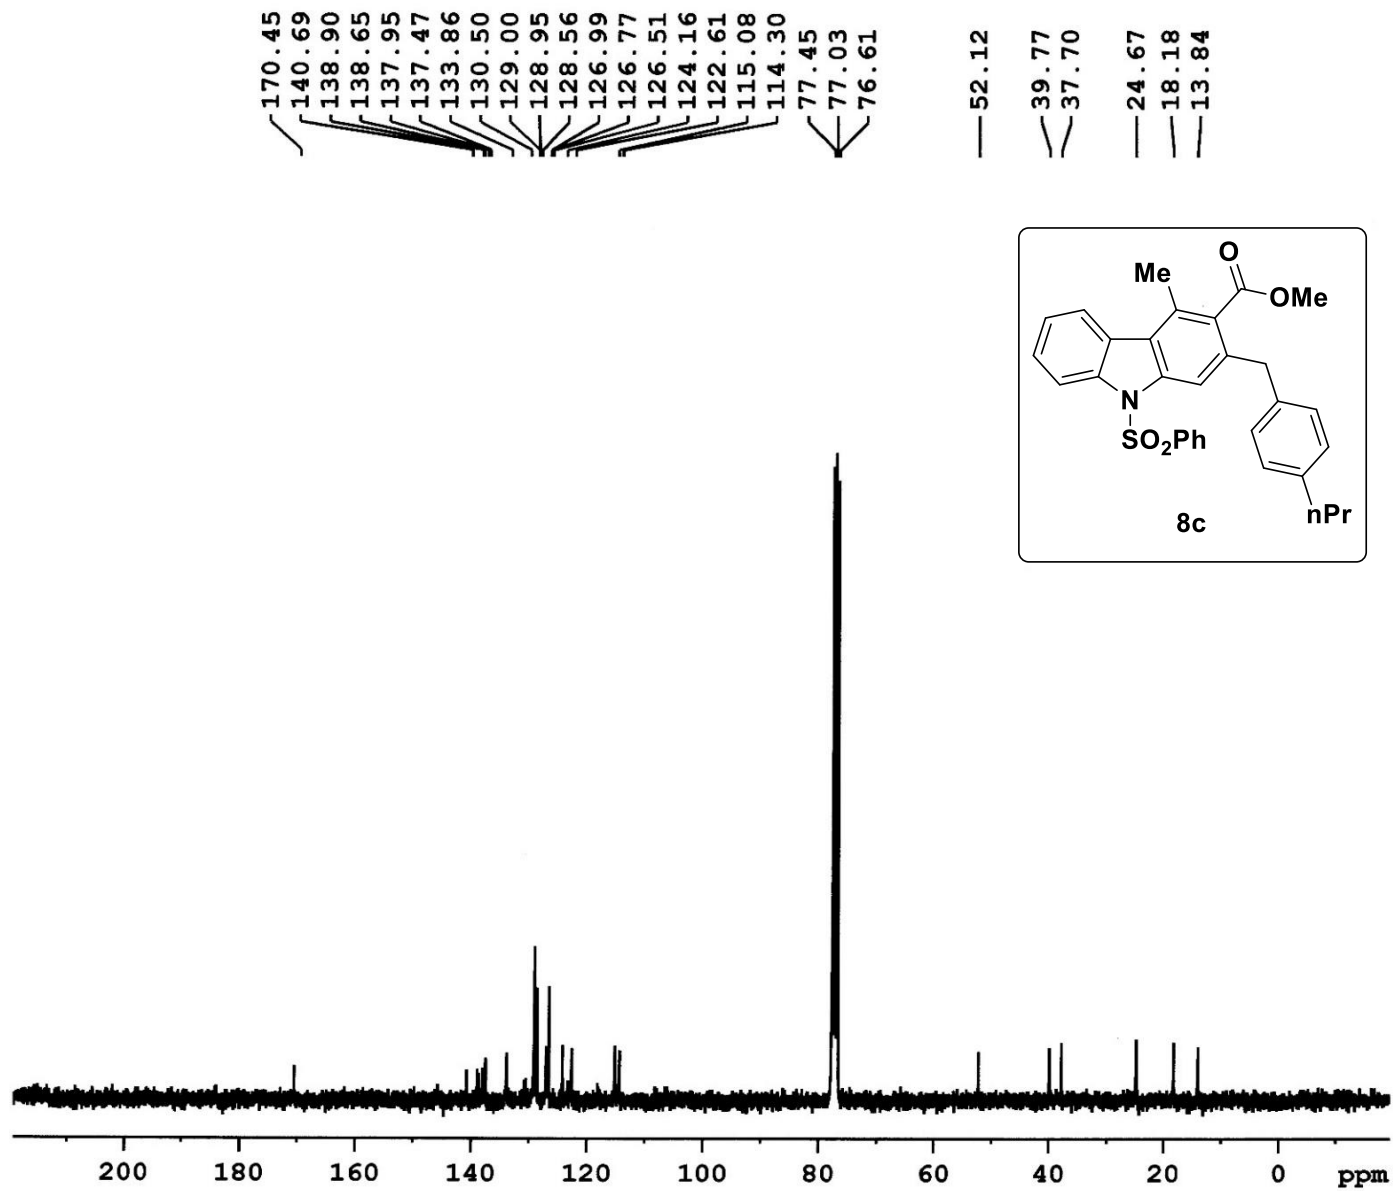

$^{13}\text{C} \{^1\text{H}\}$  NMR (75 MHz,  $\text{CDCl}_3$ ) spectrum of compound **8c**

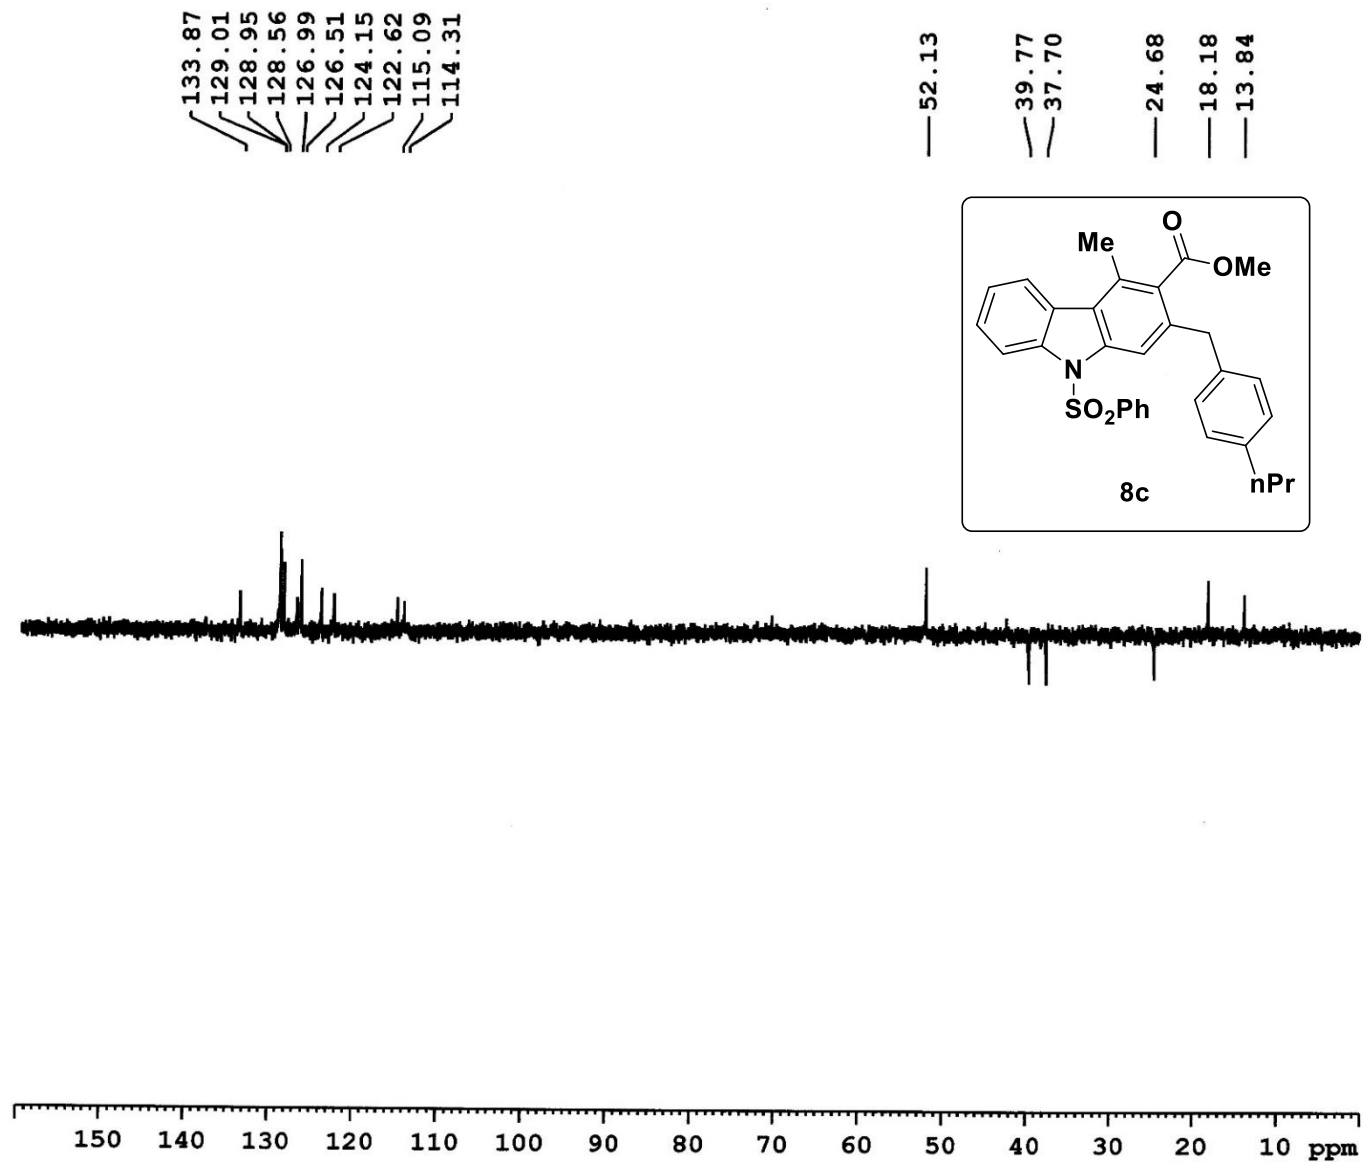

DEPT-135 NMR (75 MHz, CDCl<sub>3</sub>) spectrum of compound **8c**

DRAKM

AG-V-185 30 (1.118) AM2 (Ar,20000.0,556.28,0.00,LS 10); Cm (24:33)

1: TOF MS ES+  
9.55e5

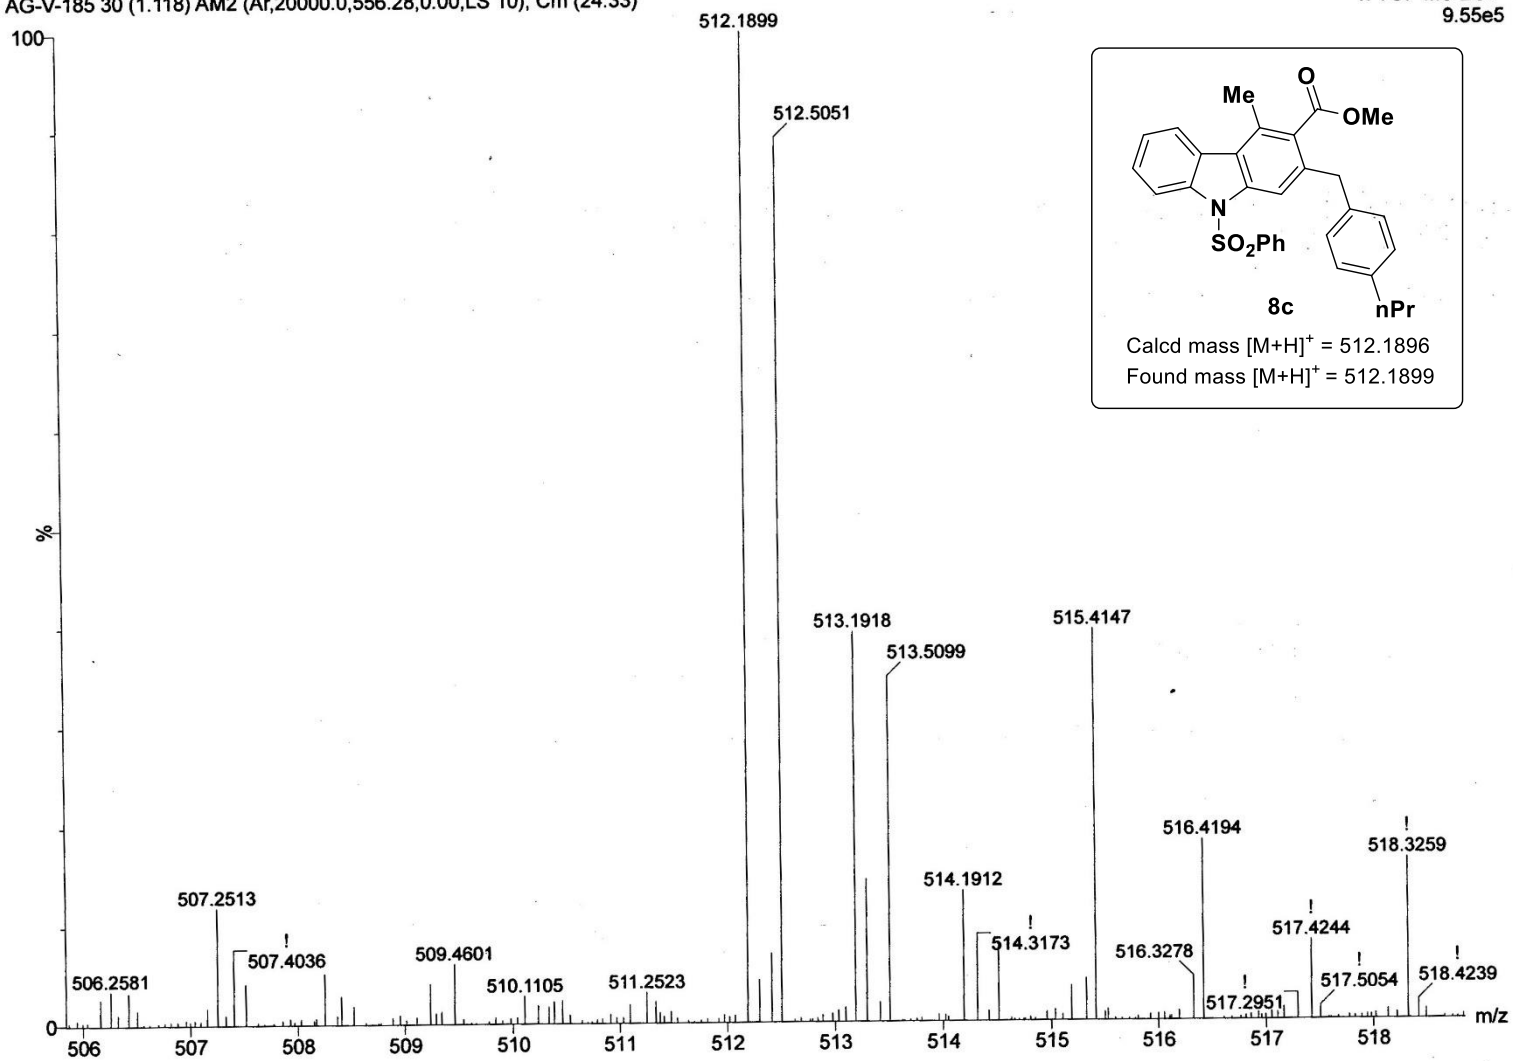

HRMS Spectrum of compound **8c**

AG-V-187

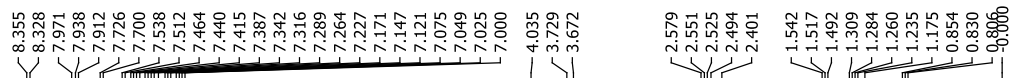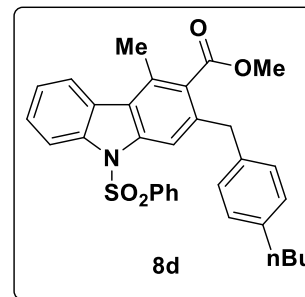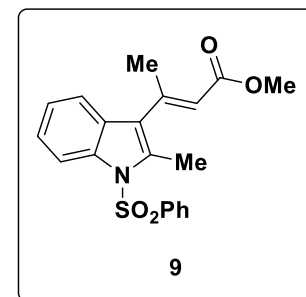

Inseparable mixture

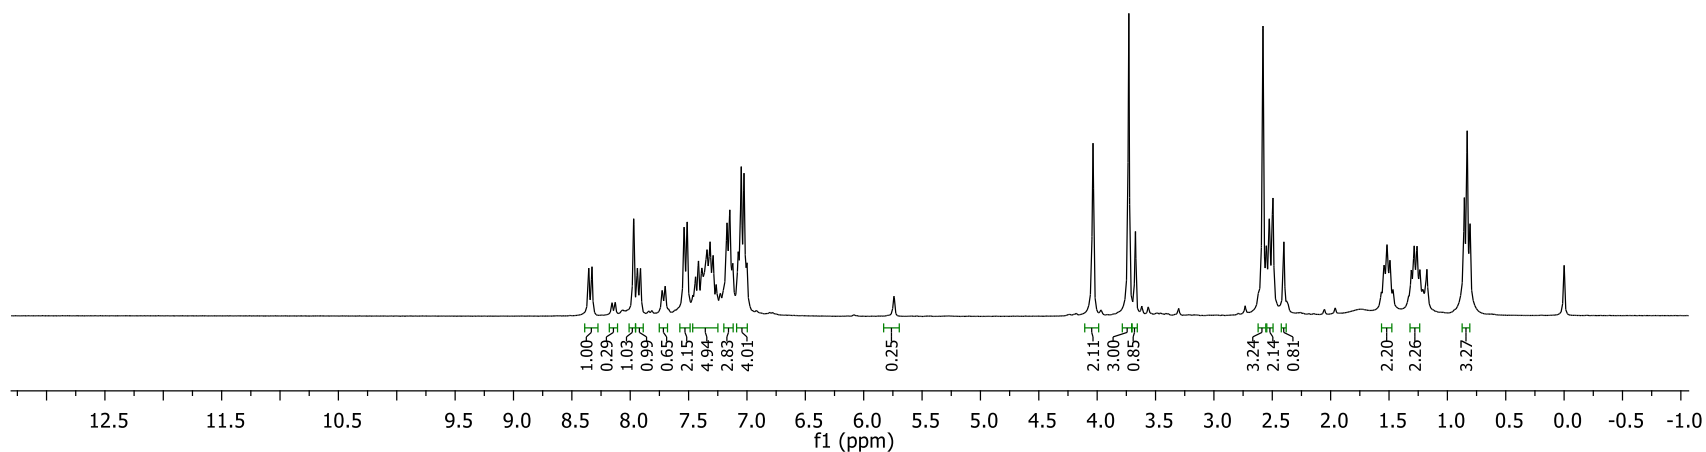

<sup>1</sup>H NMR (CDCl<sub>3</sub>, 300 MHz) spectrum of compounds **8d** & **9**

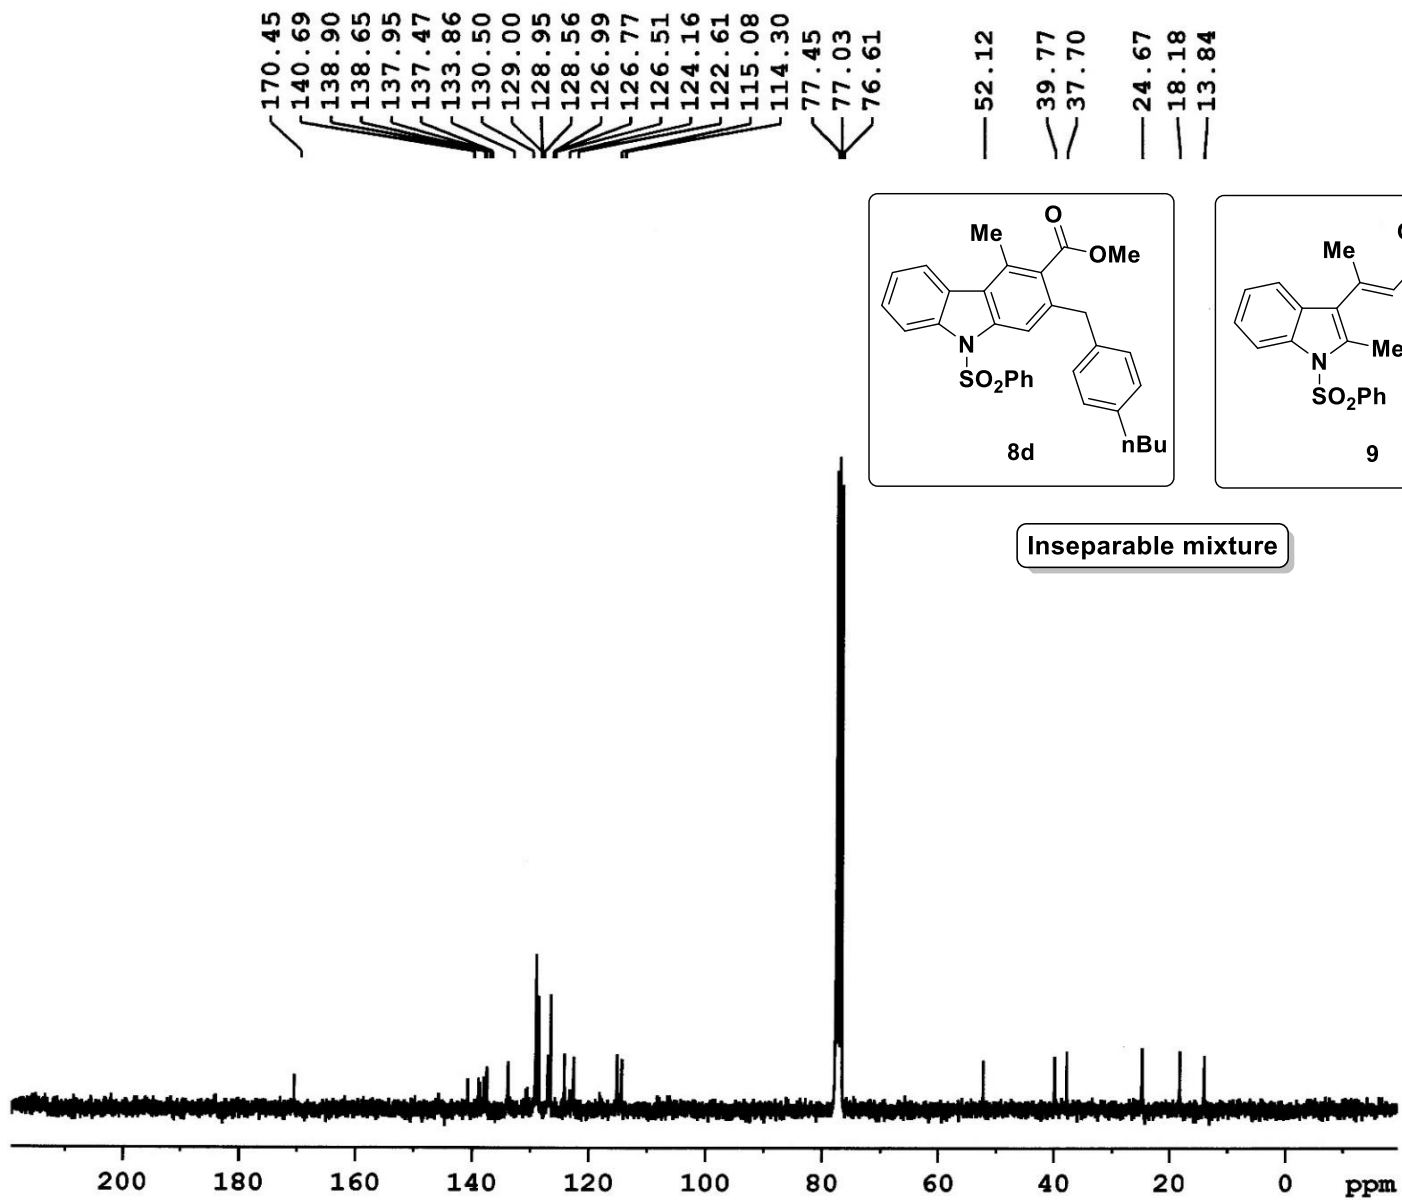

$^{13}\text{C} \{^1\text{H}\}$  NMR (75 MHz,  $\text{CDCl}_3$ ) spectrum of compounds **8d** & **9**

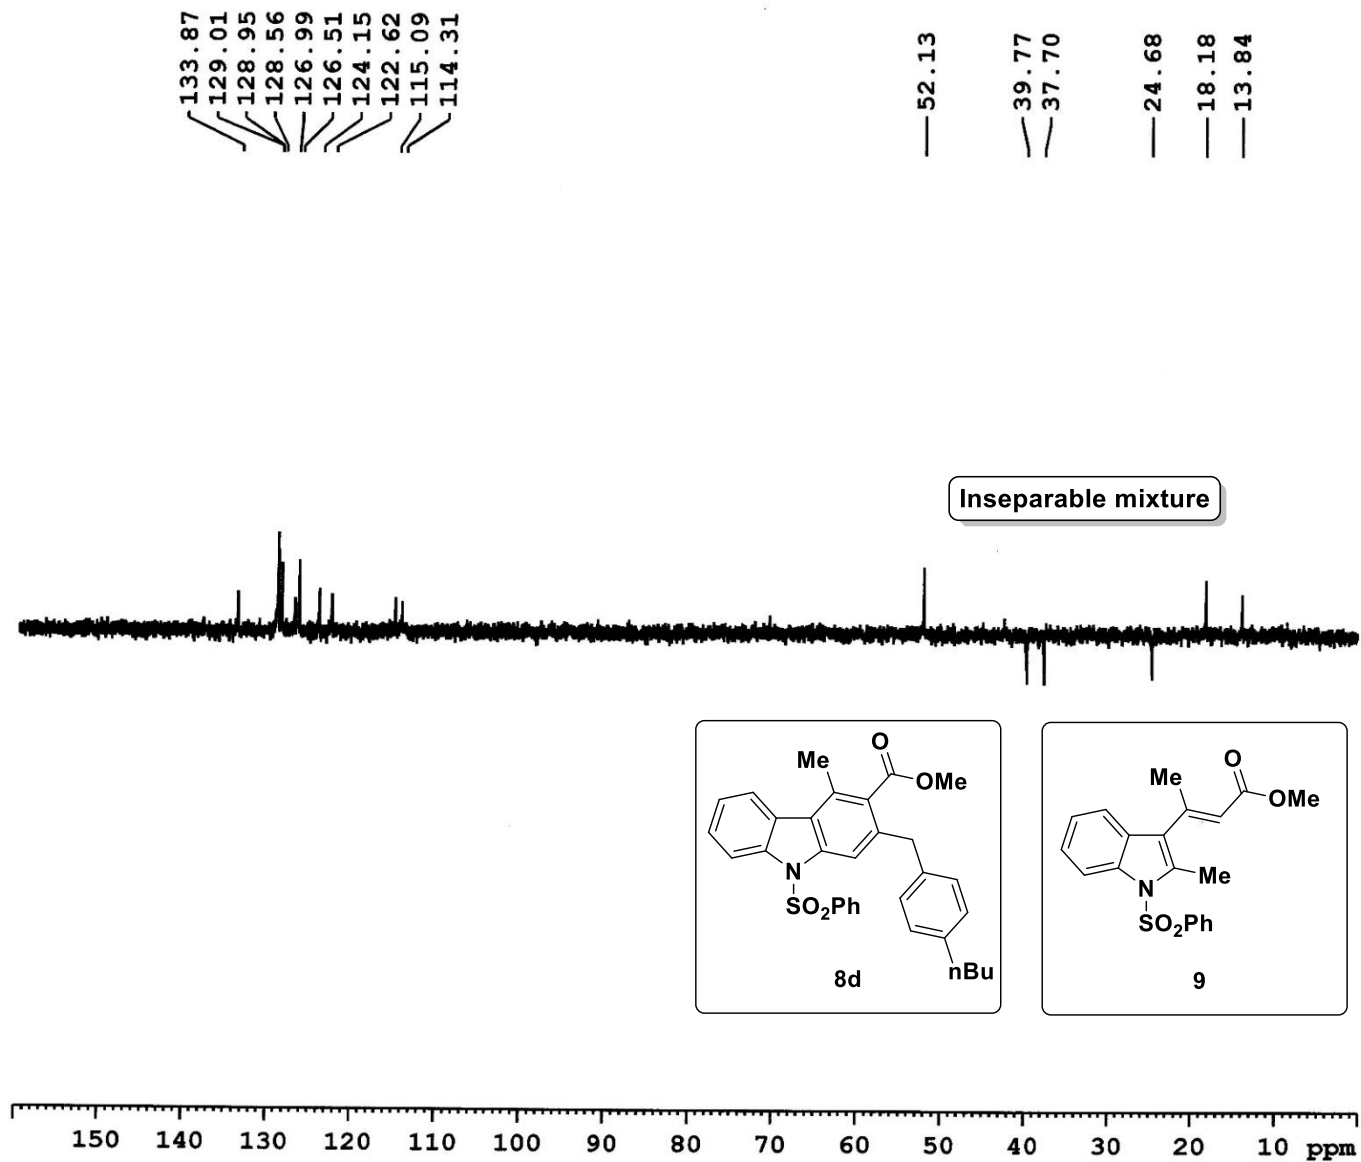

DEPT-135 NMR (75 MHz, CDCl<sub>3</sub>) spectrum of compounds **8d** & **9**

DRAKM  
AG-V-187 25 (0.934) AM2 (Ar,20000.0,556.28,0.00,LS 10)

1: TOF MS ES+  
7.15e5

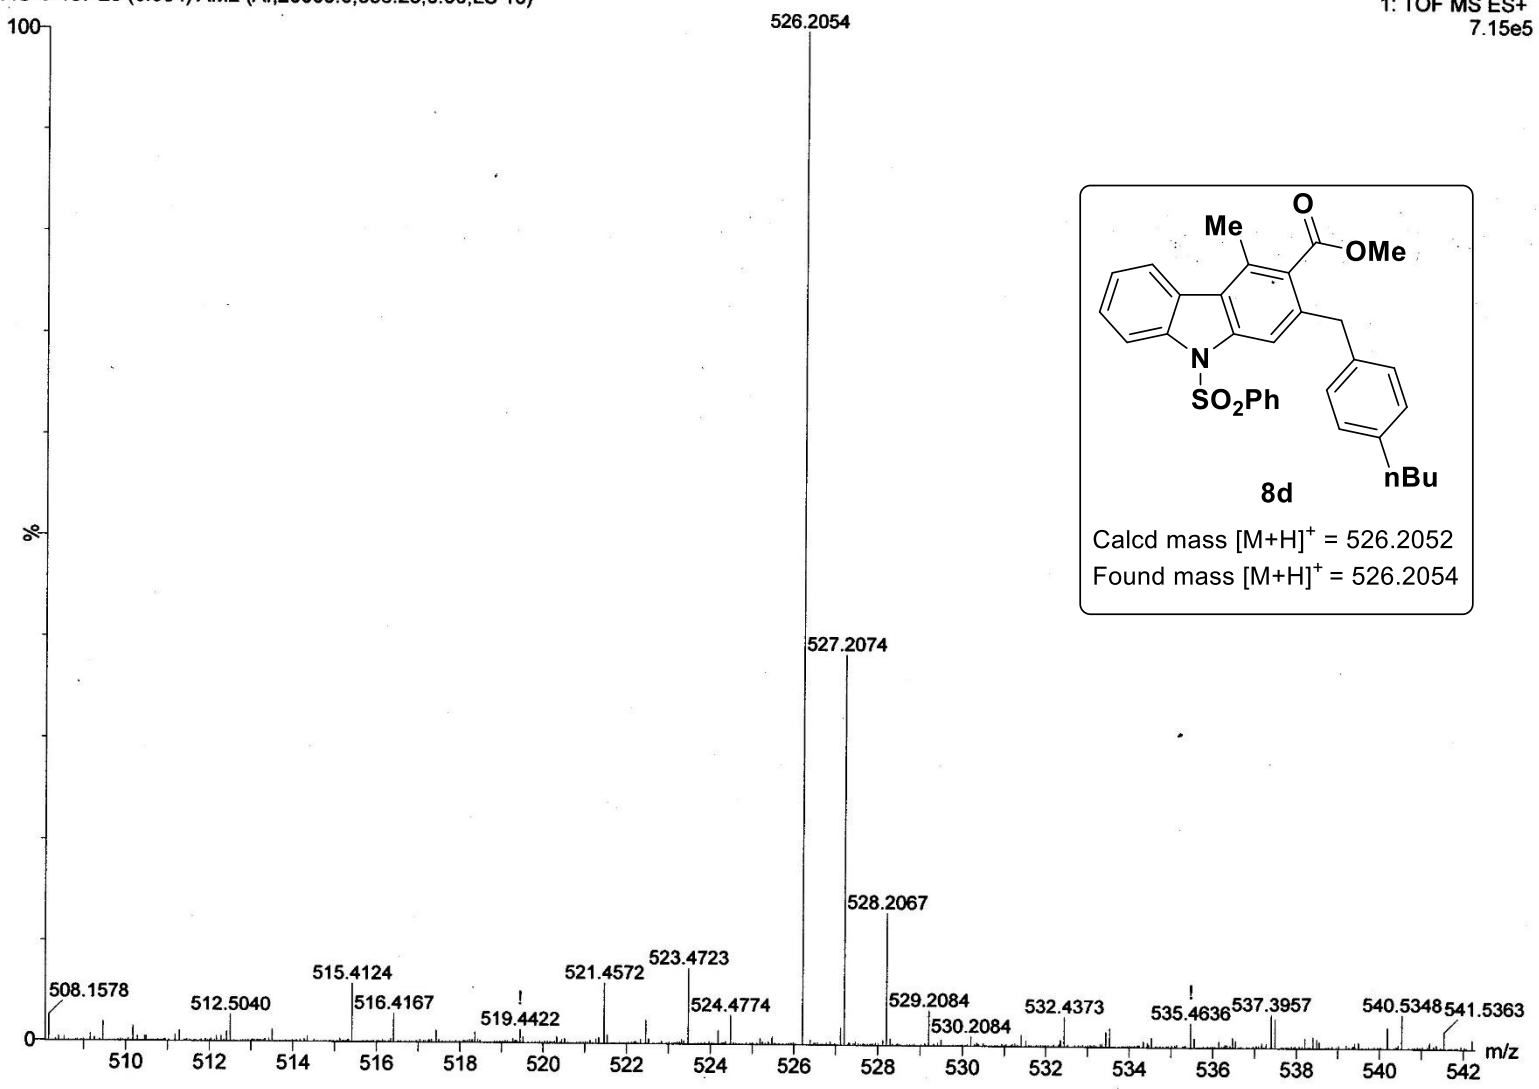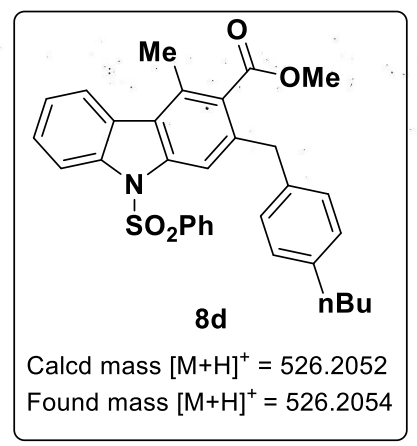

HRMS Spectrum of compound **8d**



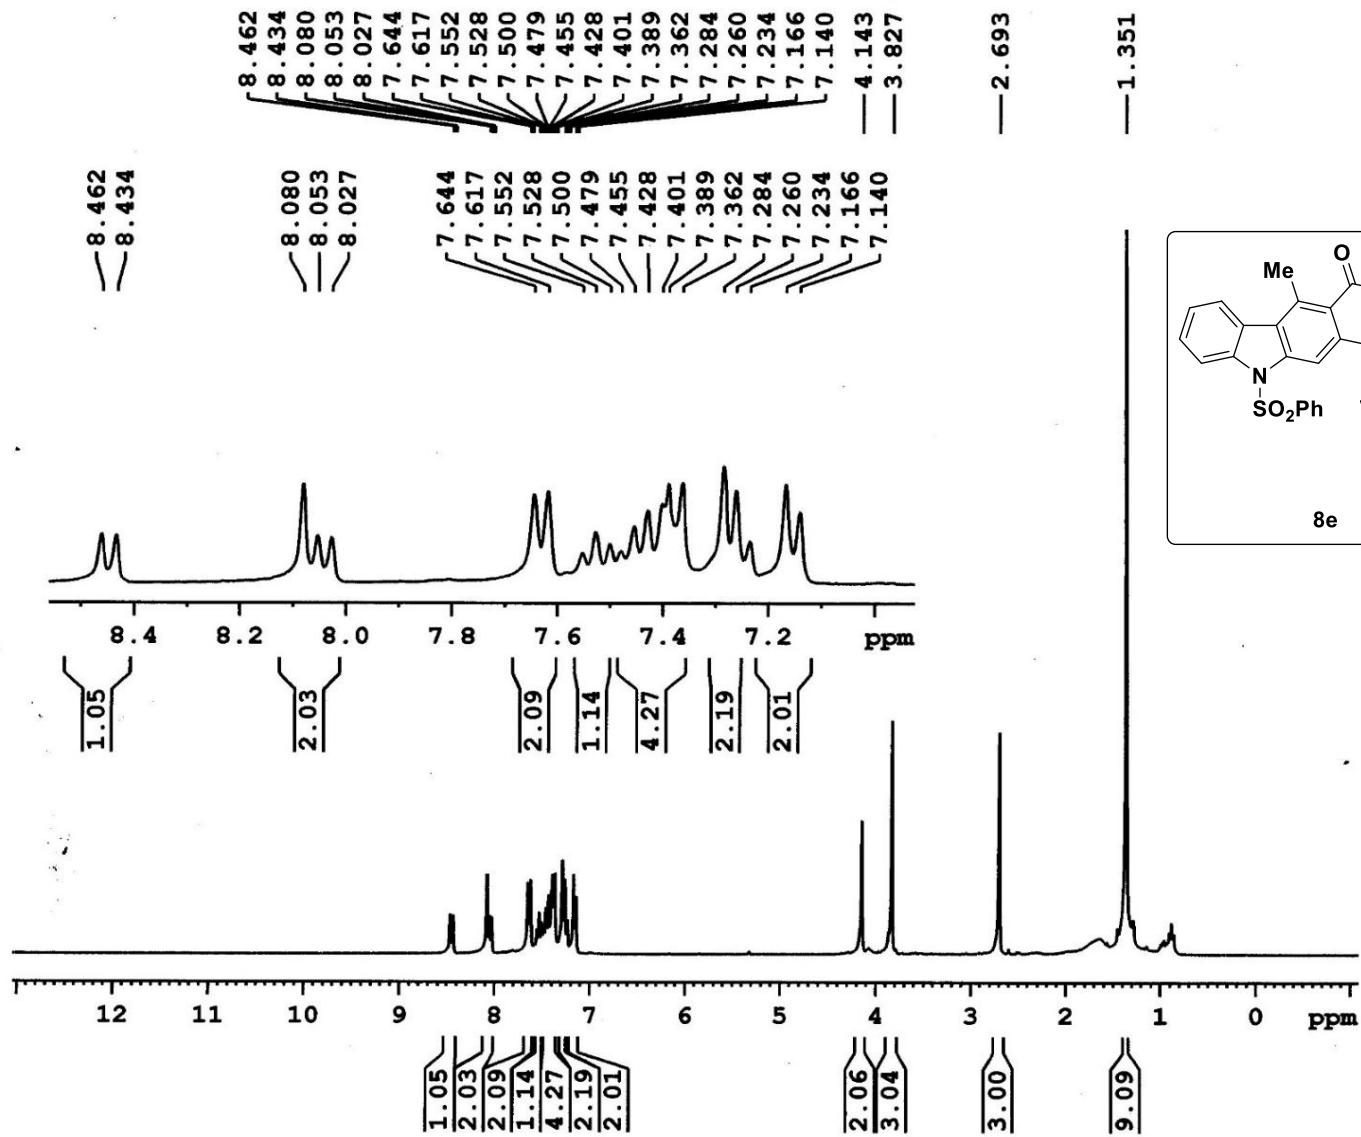

**<sup>1</sup>H NMR (300 MHz, CDCl<sub>3</sub>) spectrum of compound 8e**

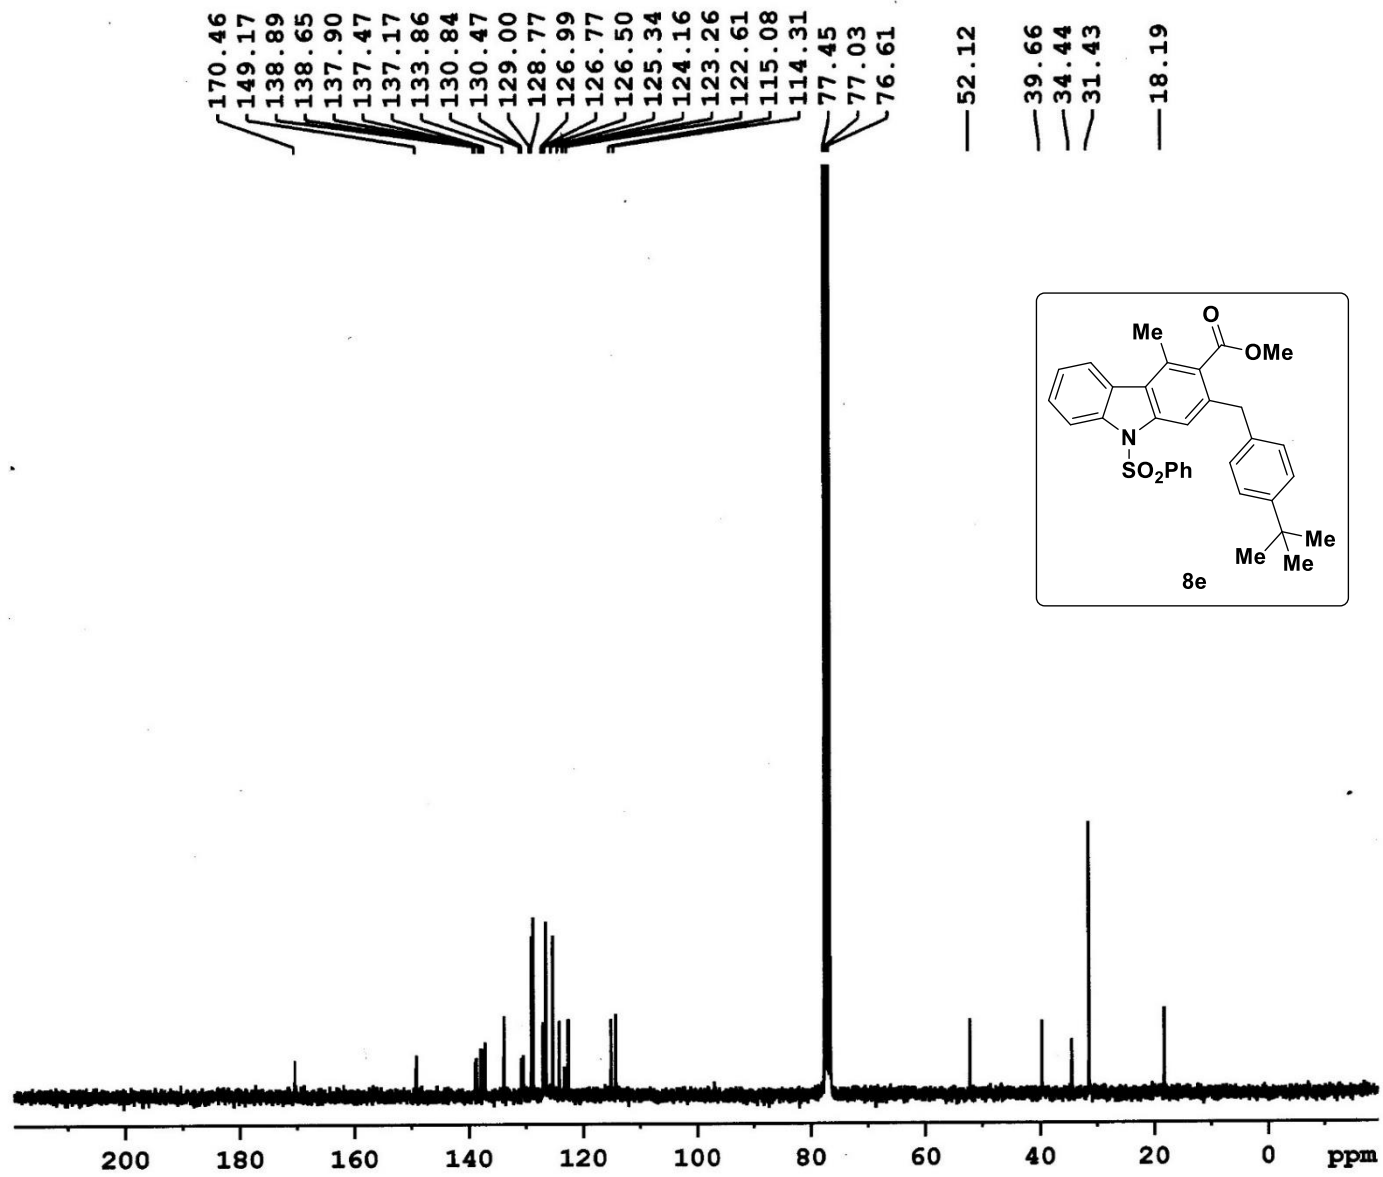

<sup>13</sup>C {<sup>1</sup>H} NMR (75 MHz, CDCl<sub>3</sub>) spectrum of compound **8e**

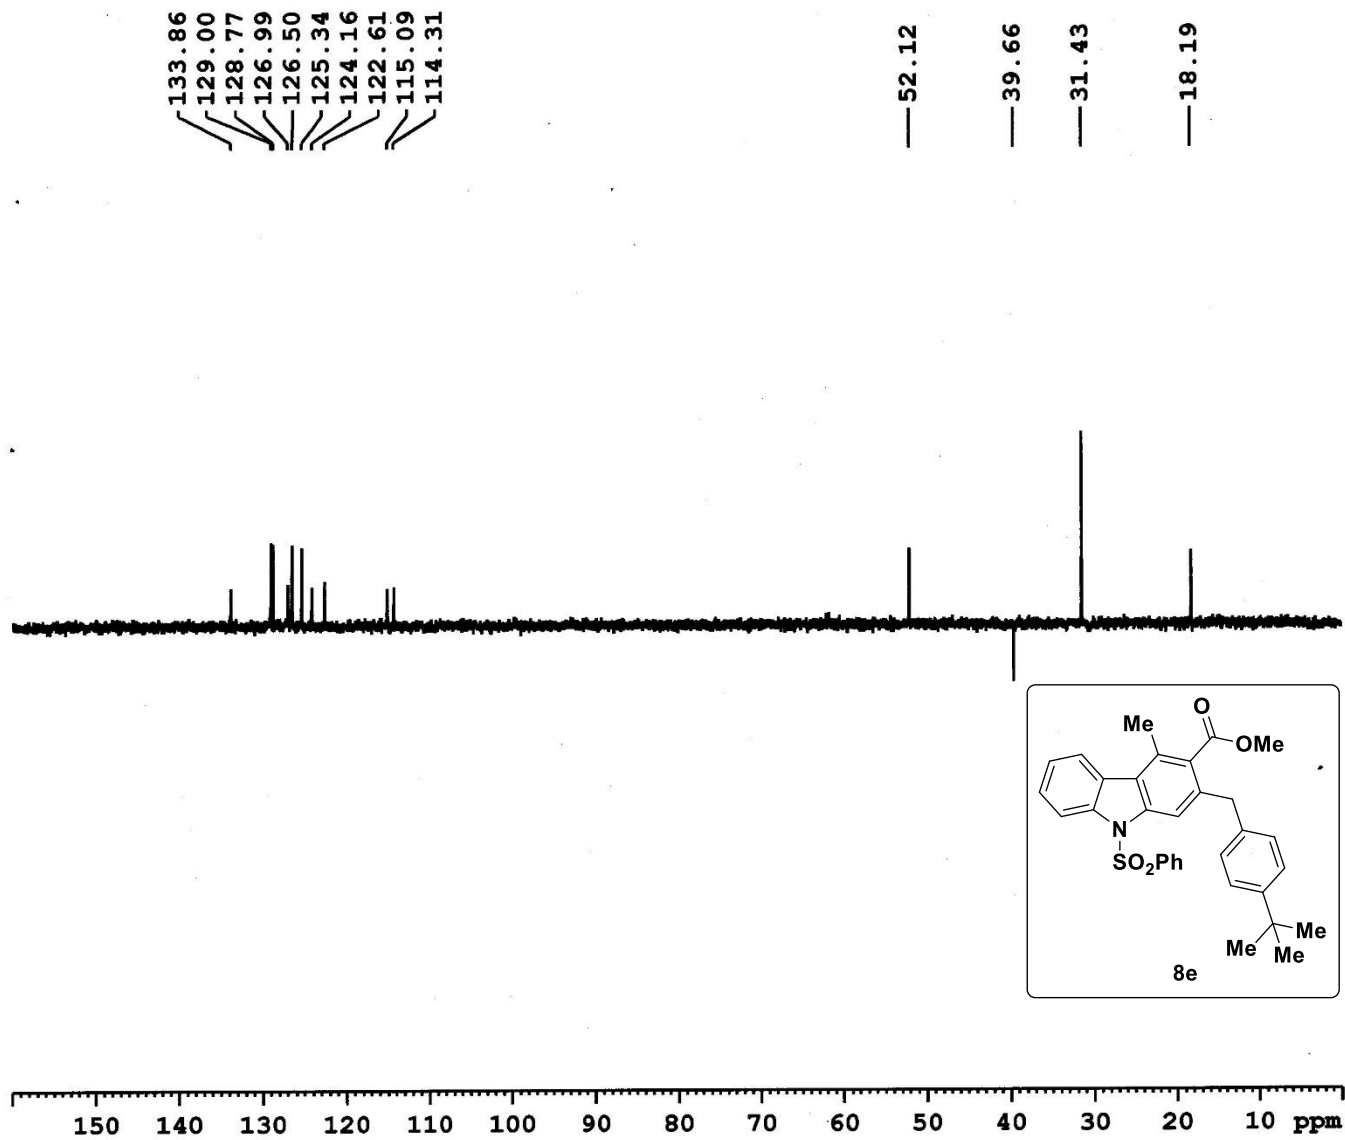

DEPT-135 NMR (75 MHz, CDCl<sub>3</sub>) spectrum of compound **8e**

DRAKM

AG-V-184 24 (0.898) AM2 (Ar,20000.0,556.28,0.00,LS 10)

1: TOF MS ES+  
2.12e4

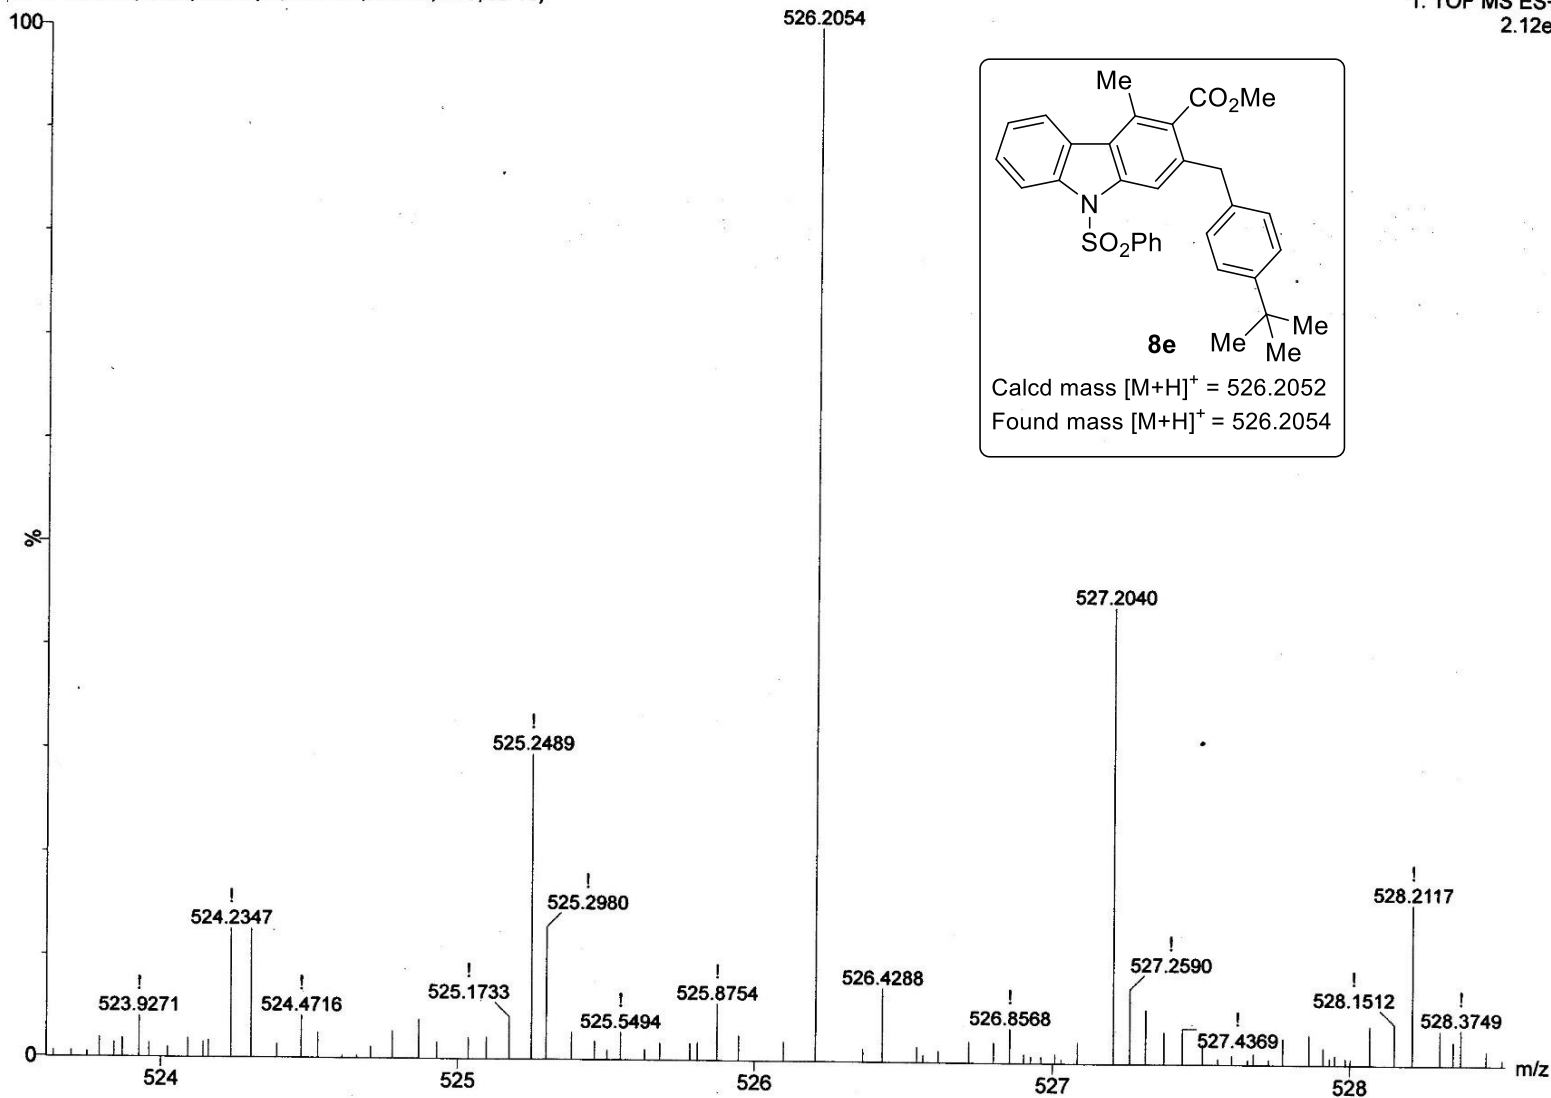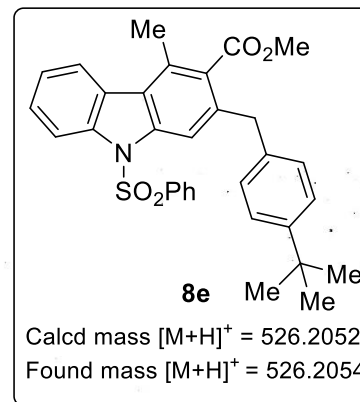

HRMS Spectrum of compound **8e**

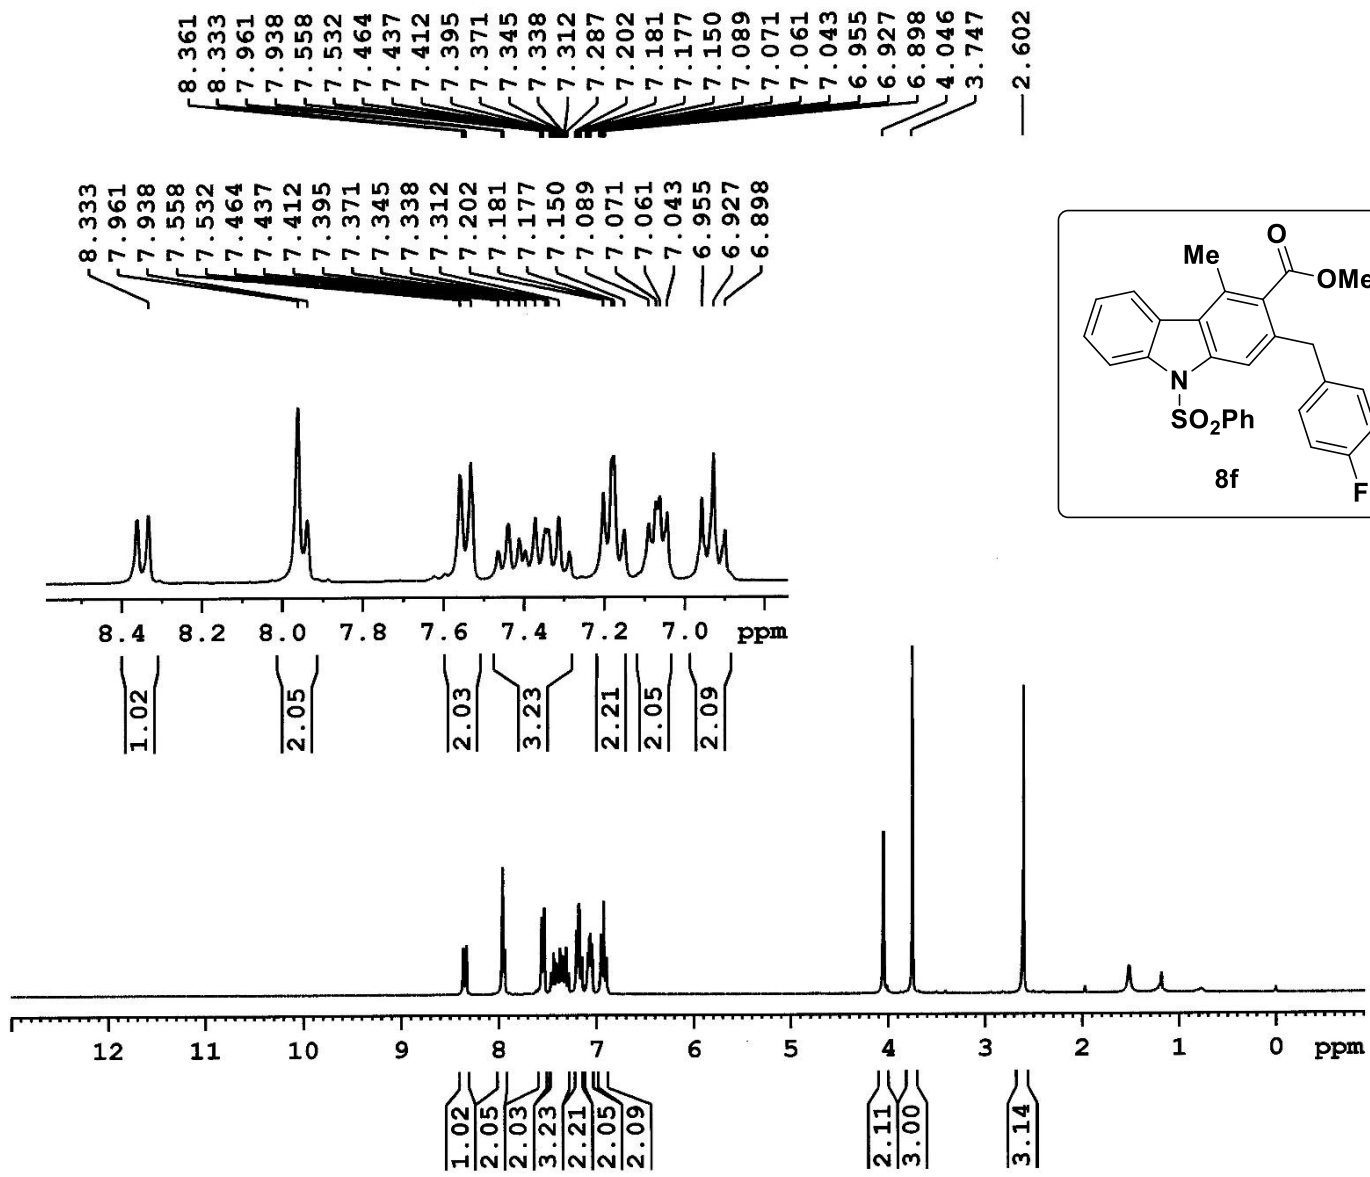

<sup>1</sup>H NMR (300 MHz, CDCl<sub>3</sub>) spectrum of compound **8f**

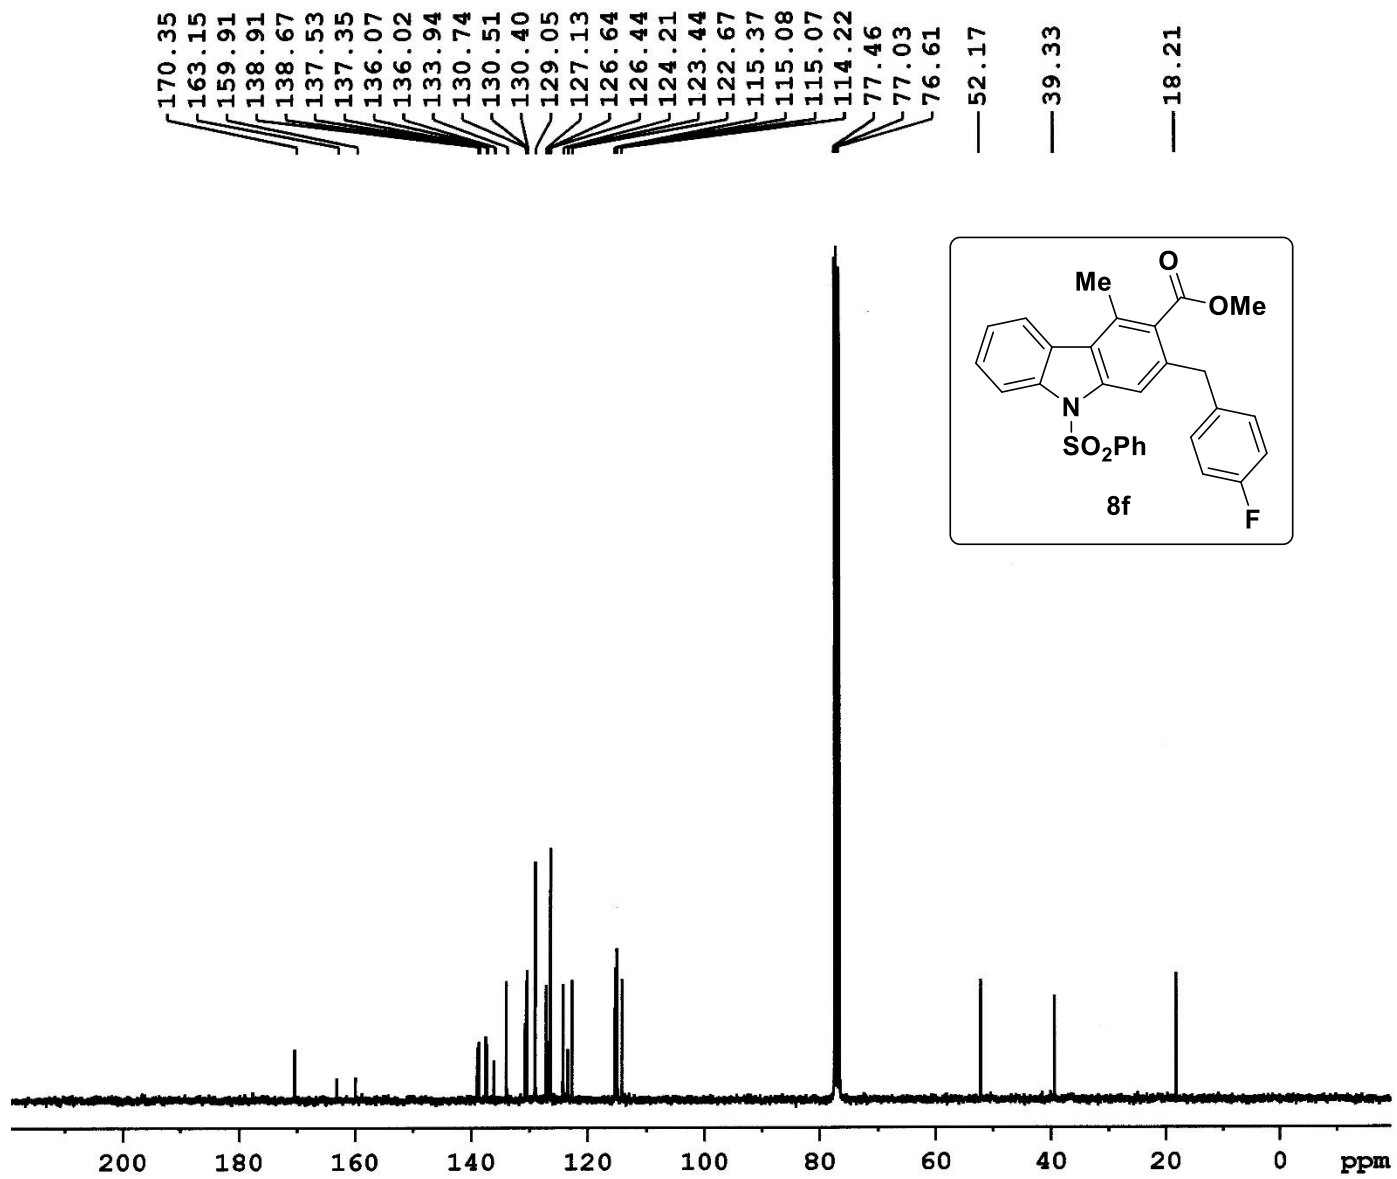

<sup>13</sup>C {<sup>1</sup>H} NMR (75 MHz, CDCl<sub>3</sub>) spectrum of compound **8f**

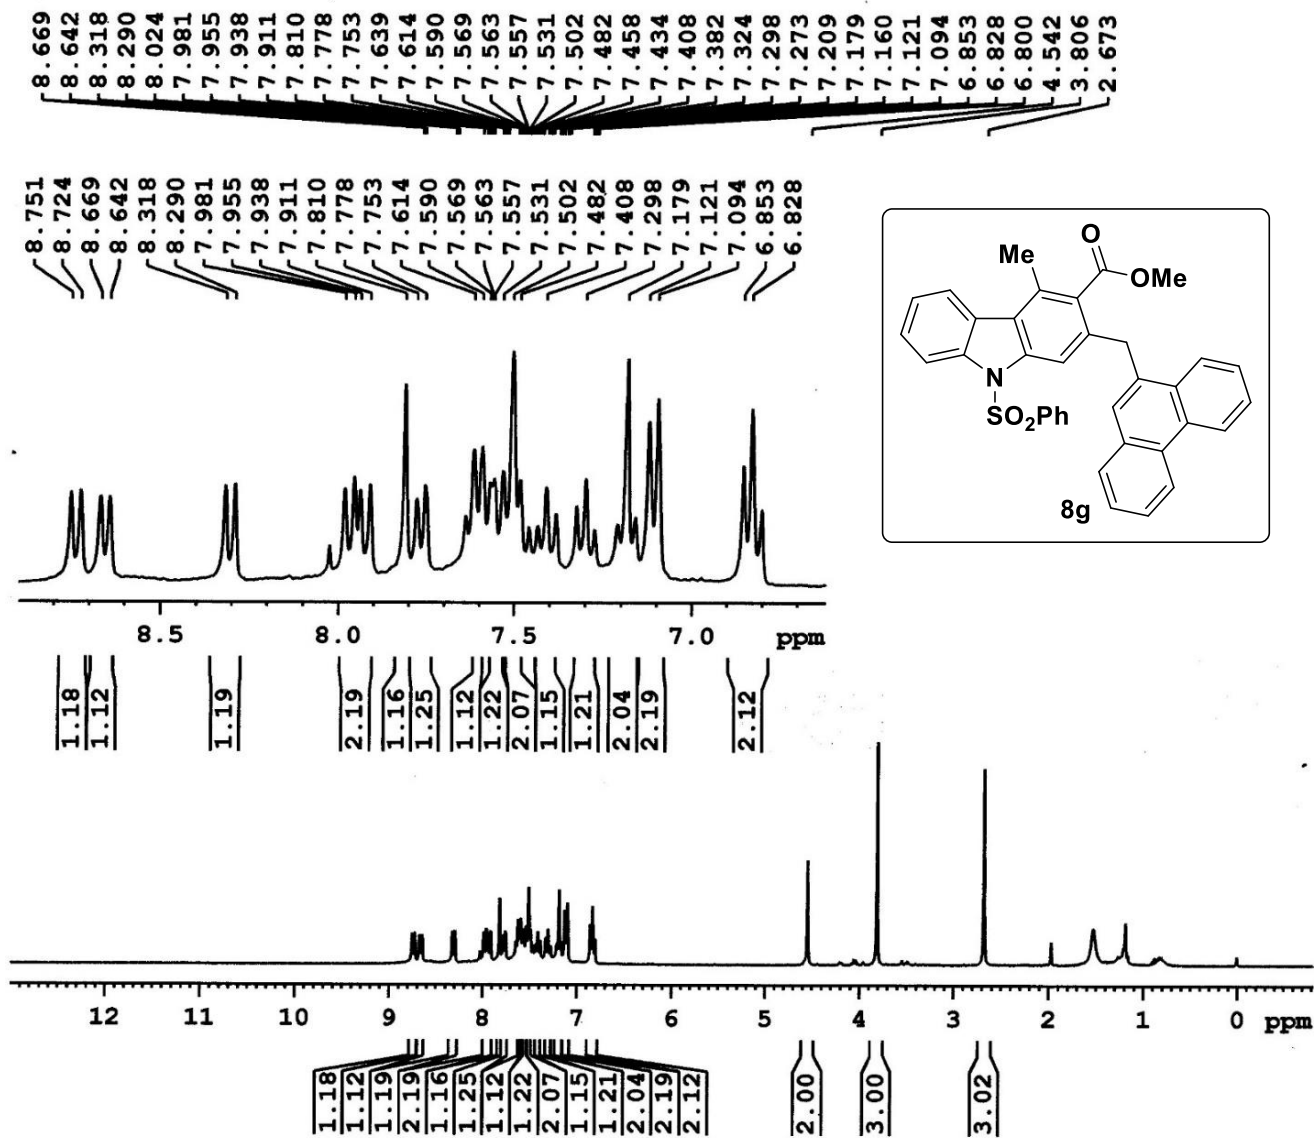

<sup>1</sup>H NMR (300 MHz, CDCl<sub>3</sub>) spectrum of compound **8g**

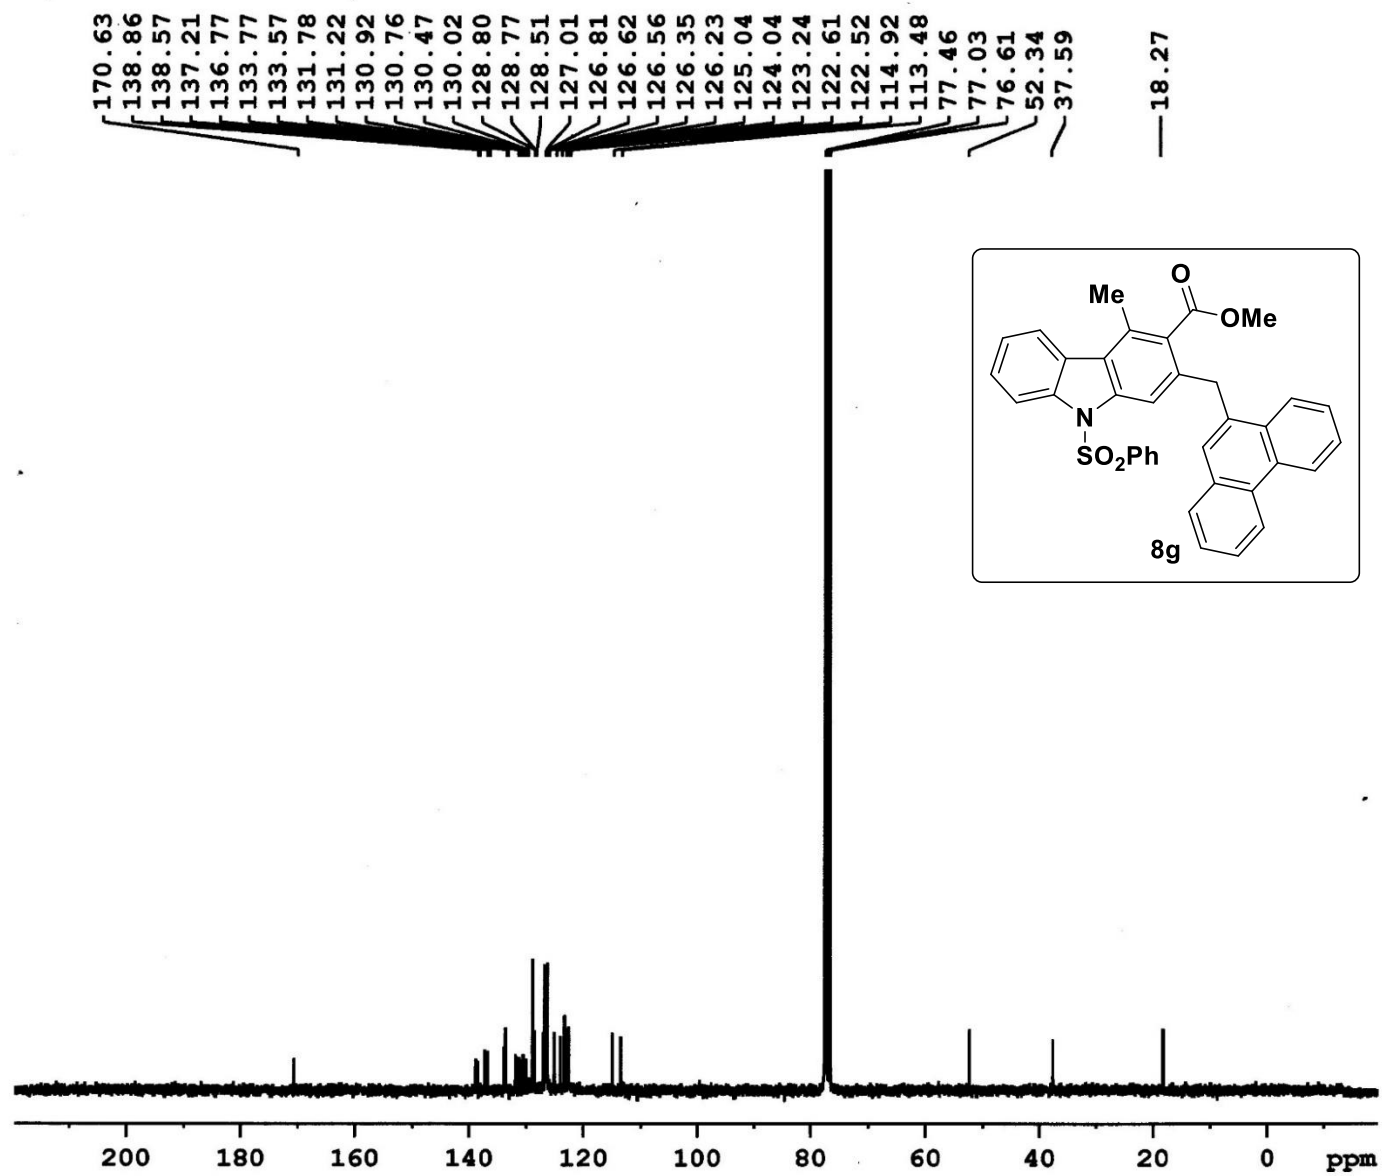

170.63  
138.86  
138.57  
137.21  
136.77  
133.77  
133.57  
131.78  
131.22  
130.92  
130.76  
130.47  
130.02  
128.80  
128.77  
128.51  
127.01  
126.81  
126.62  
126.56  
126.35  
126.23  
125.04  
124.04  
123.24  
122.61  
122.52  
114.92  
113.48  
77.46  
77.03  
76.61  
52.34  
37.59

— 18.27

**13C {1H} NMR (75 MHz, CDCl<sub>3</sub>) spectrum of compound 8g**



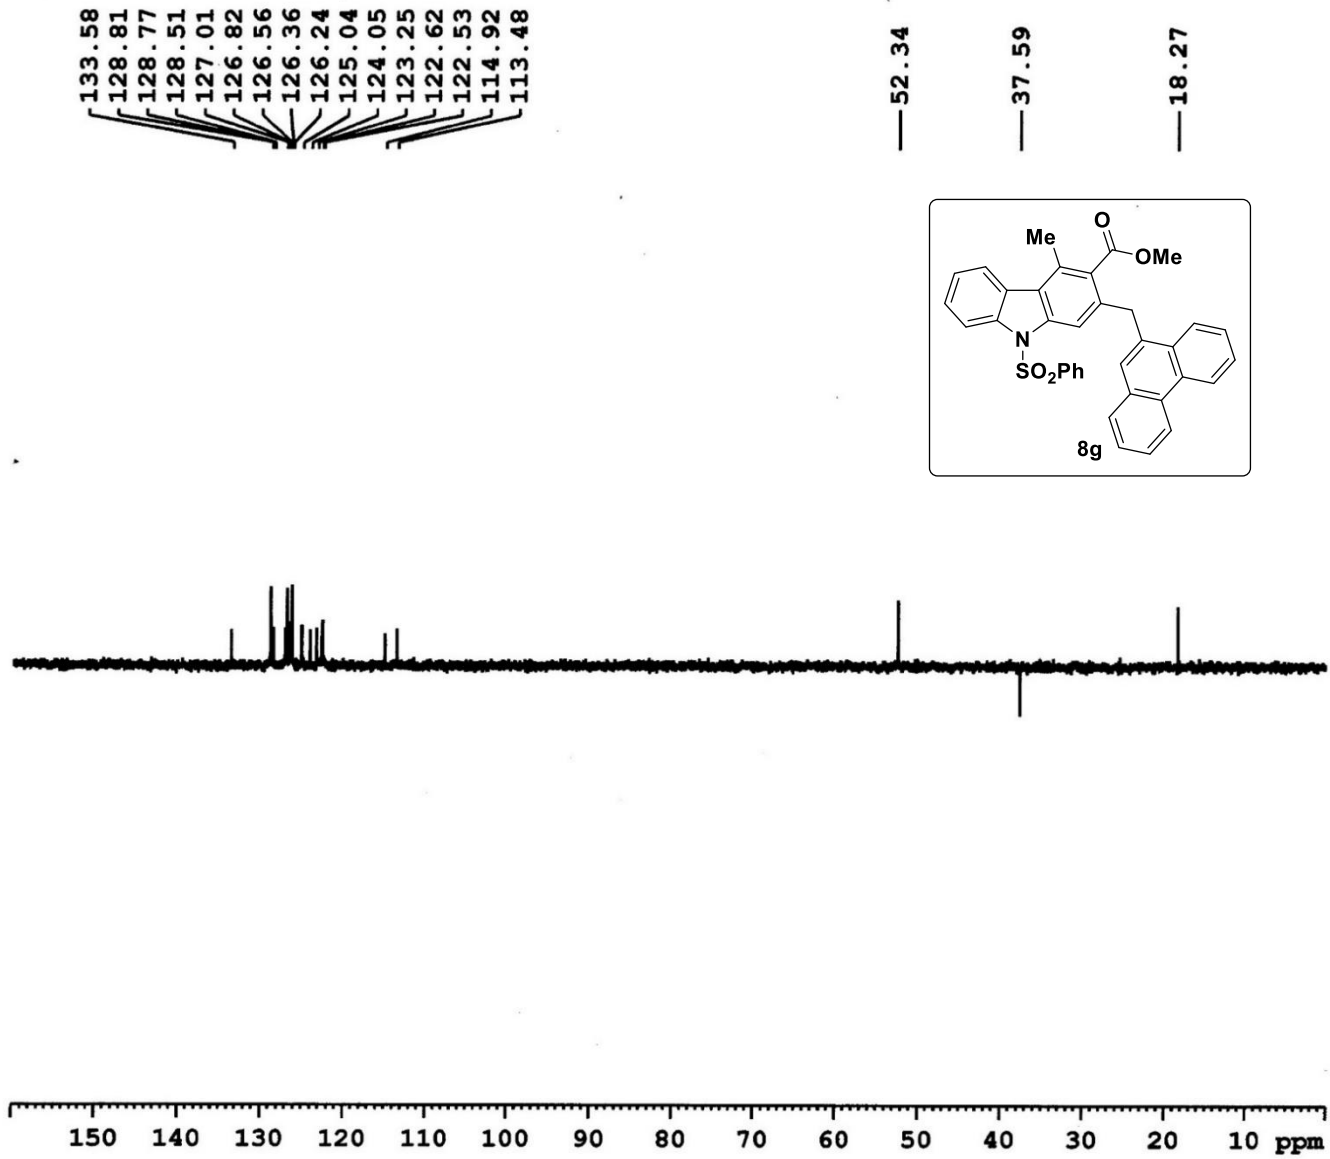

DEPT-135 NMR (75 MHz, CDCl<sub>3</sub>) spectrum of compound **8g**

DRAKM

AG-V-186 9 (0.347) AM2 (Ar,20000.0,556.28,0.00,LS 10)

1: TOF MS ES+  
8.13e3

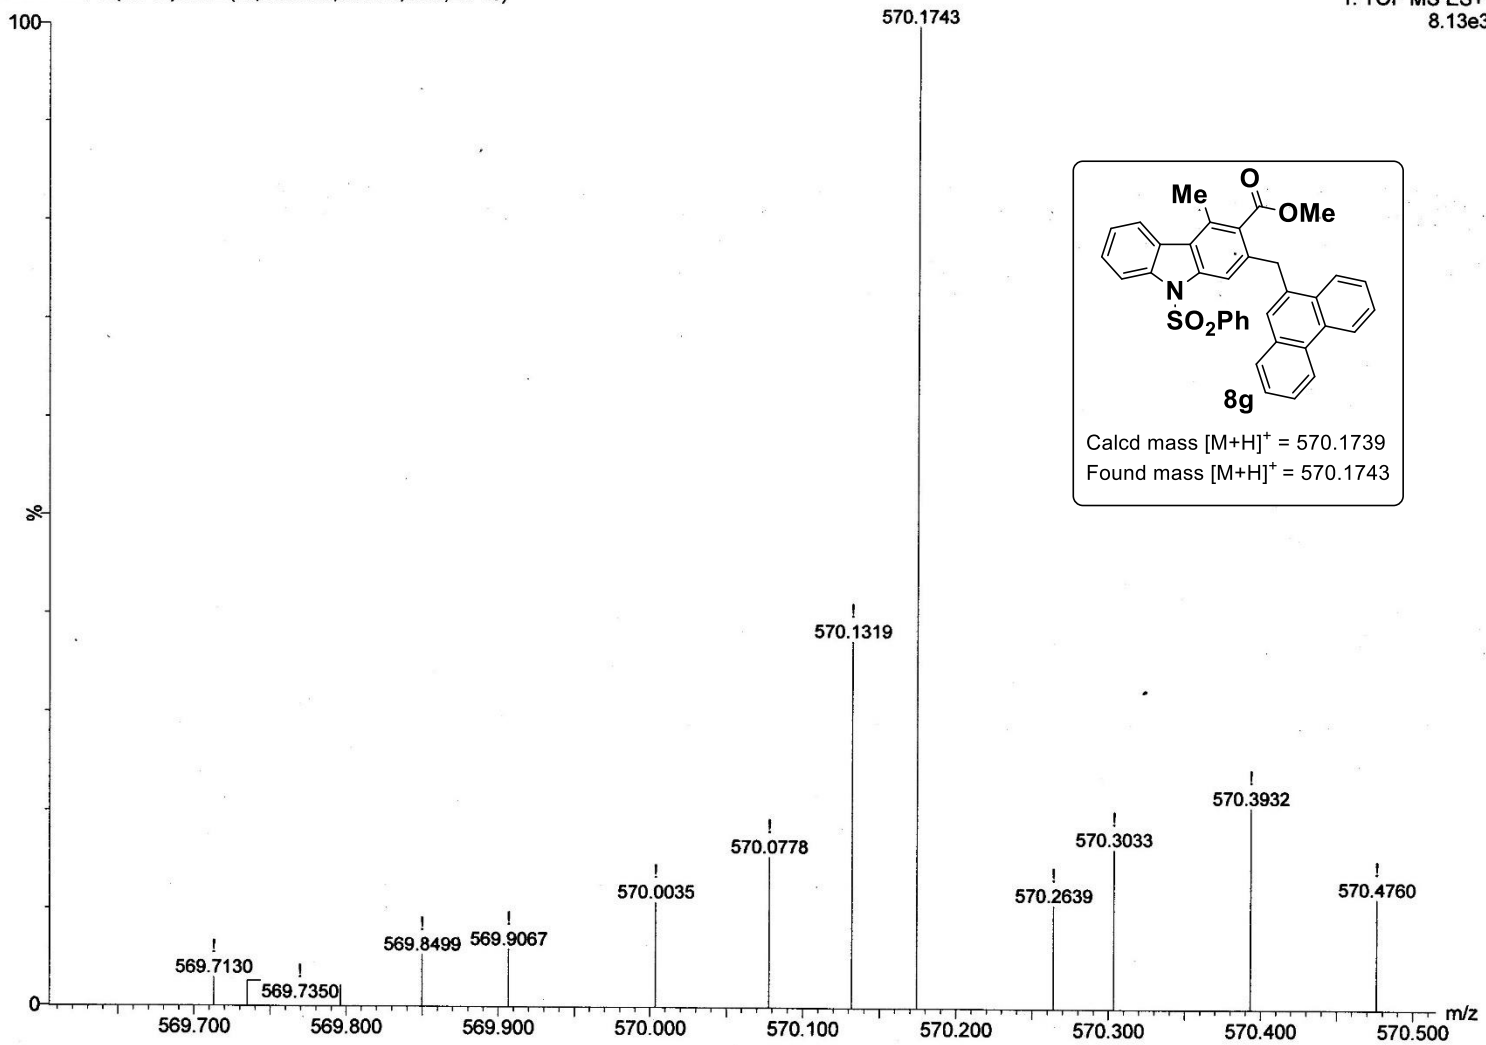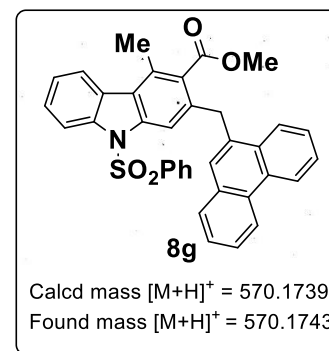

HRMS Spectrum of compound **8g**

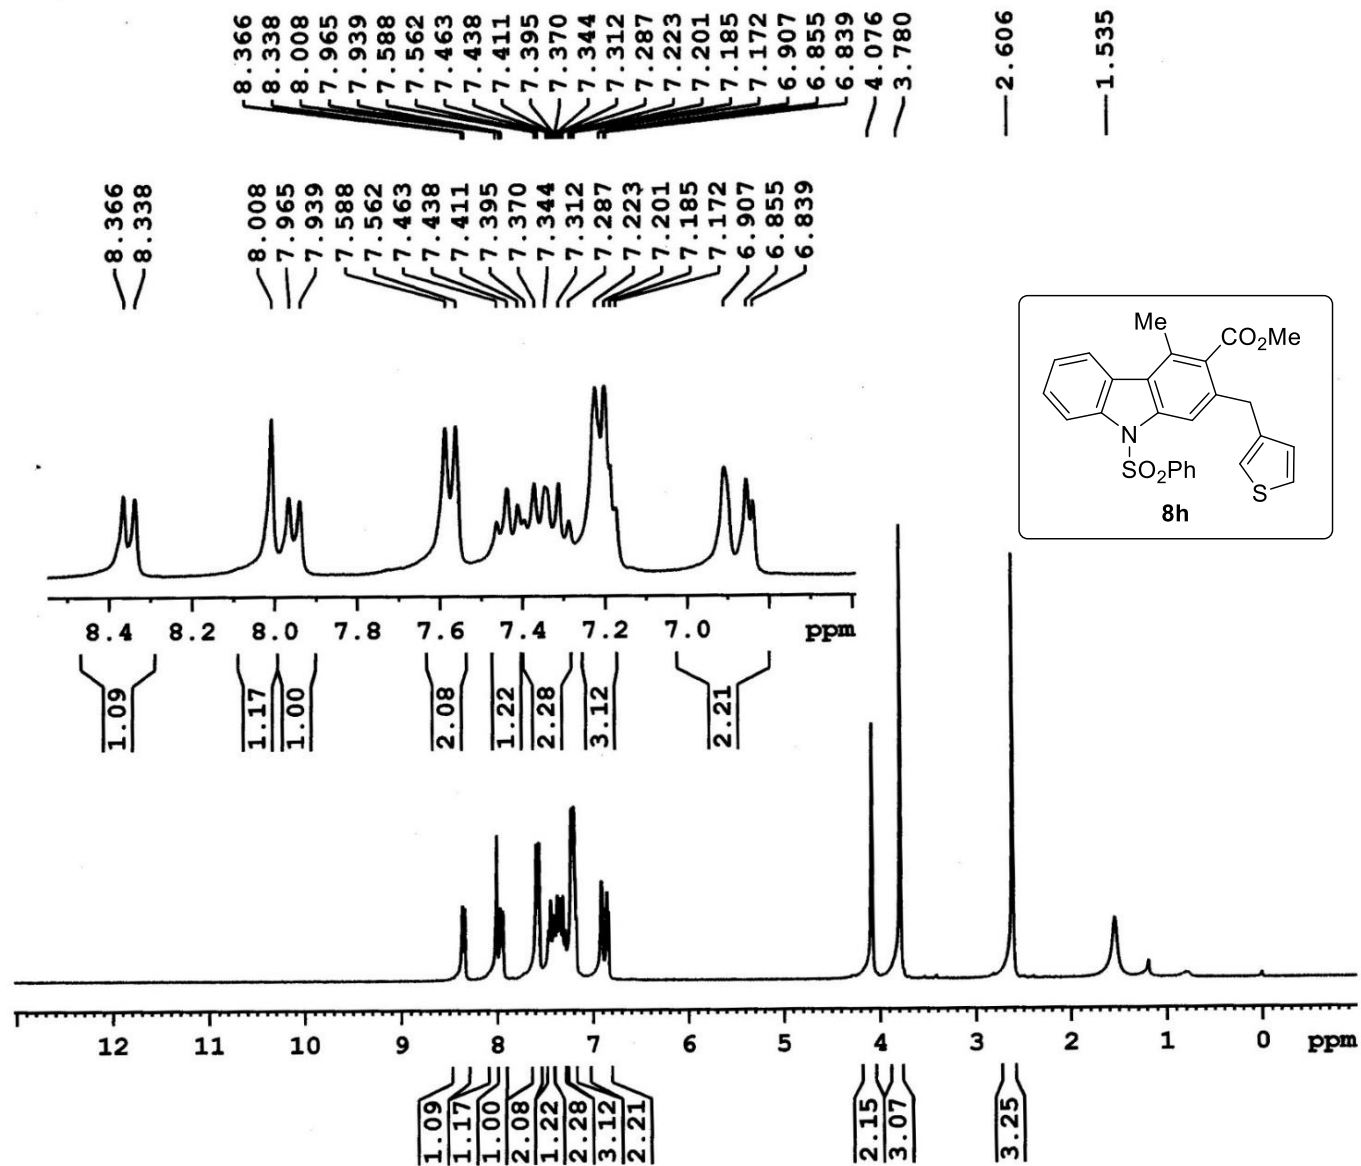

**<sup>1</sup>H NMR (300 MHz, CDCl<sub>3</sub>) spectrum of compound 8h**

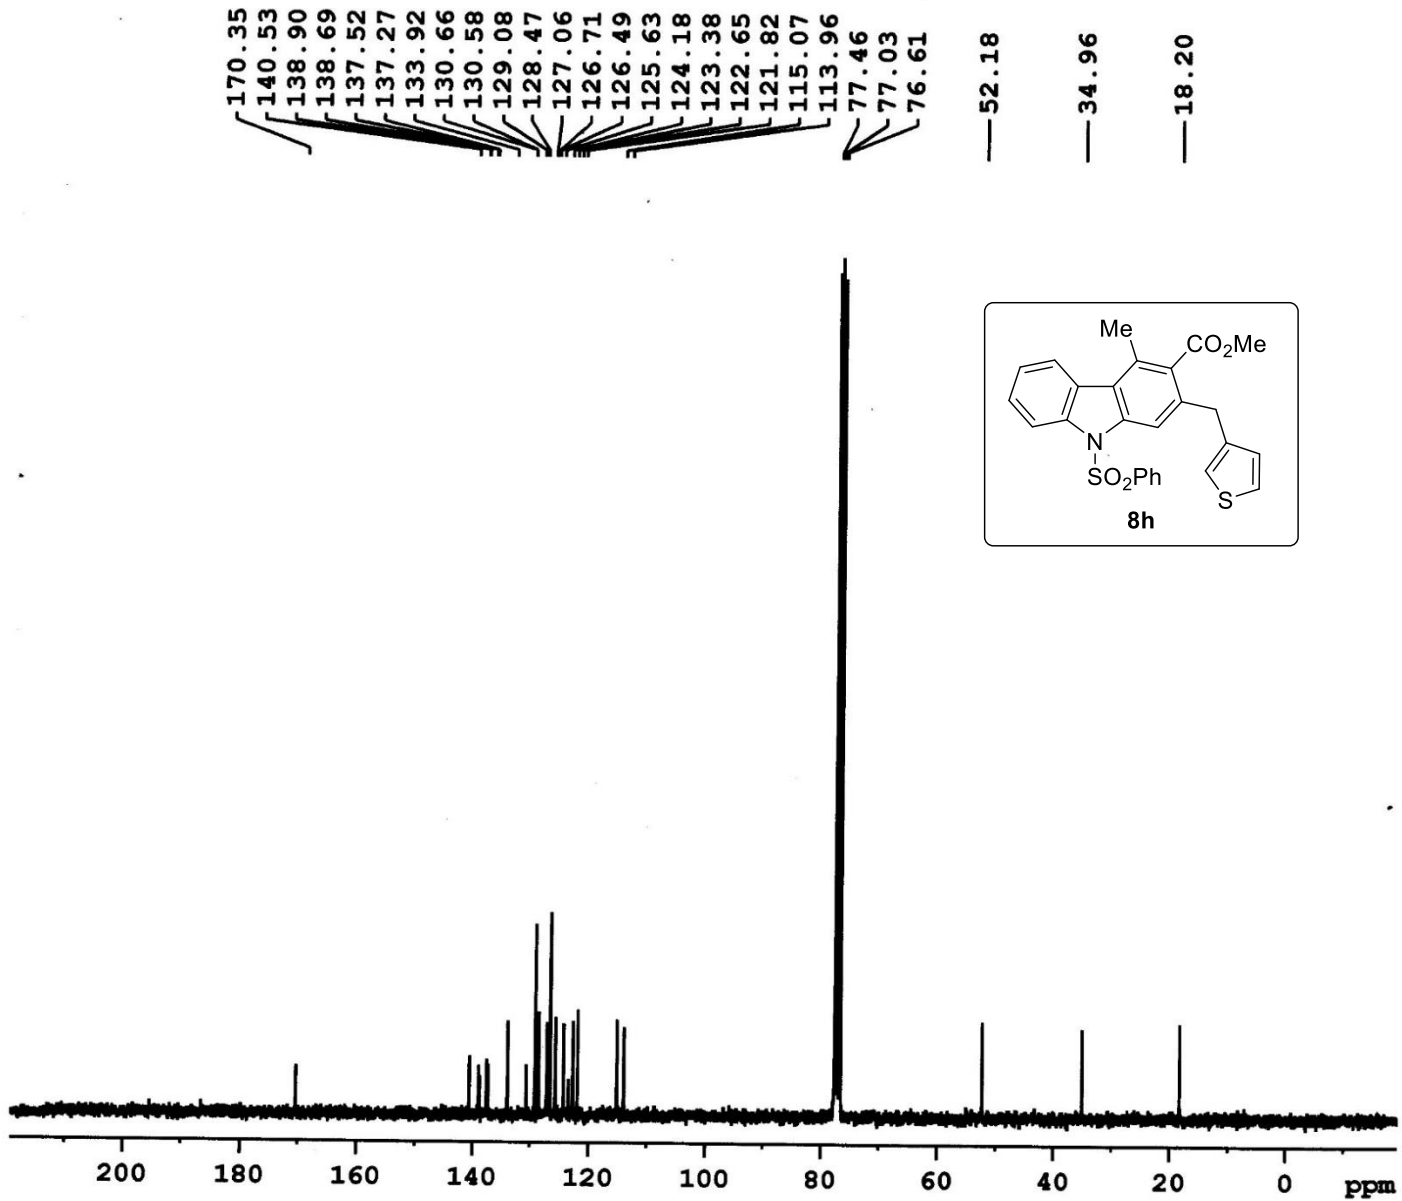

<sup>13</sup>C {<sup>1</sup>H} NMR (CDCl<sub>3</sub>, 75 MHz) spectrum of compound **8h**

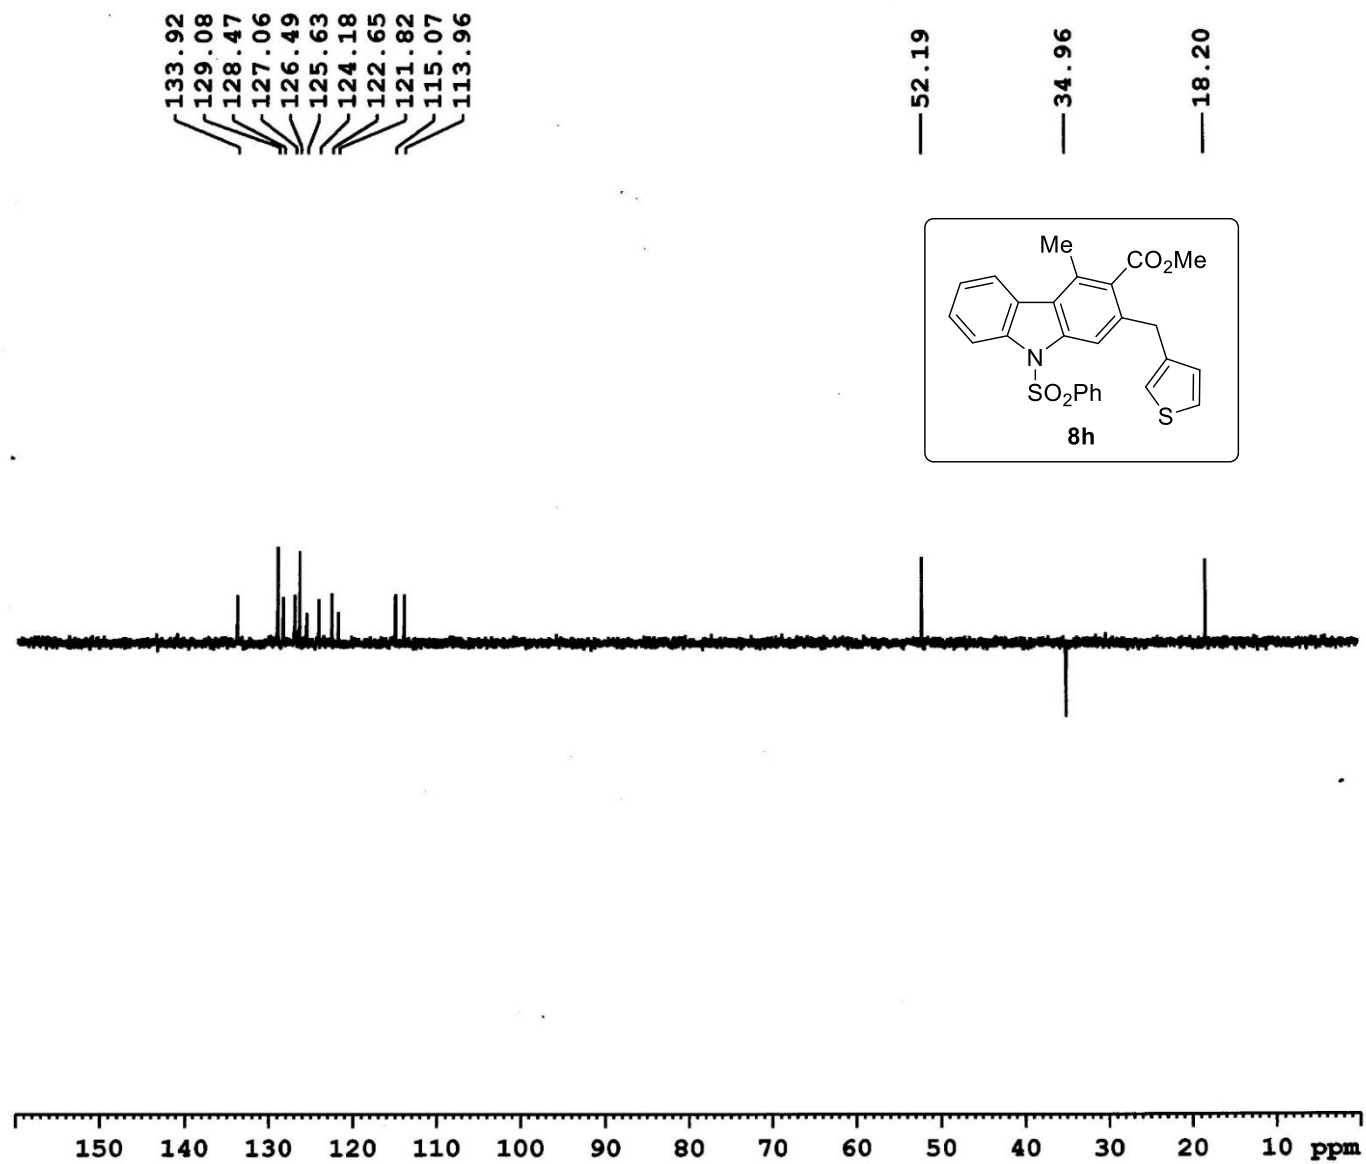

DEPT-135 NMR (75 MHz, CDCl<sub>3</sub>) spectrum of compound **8h**

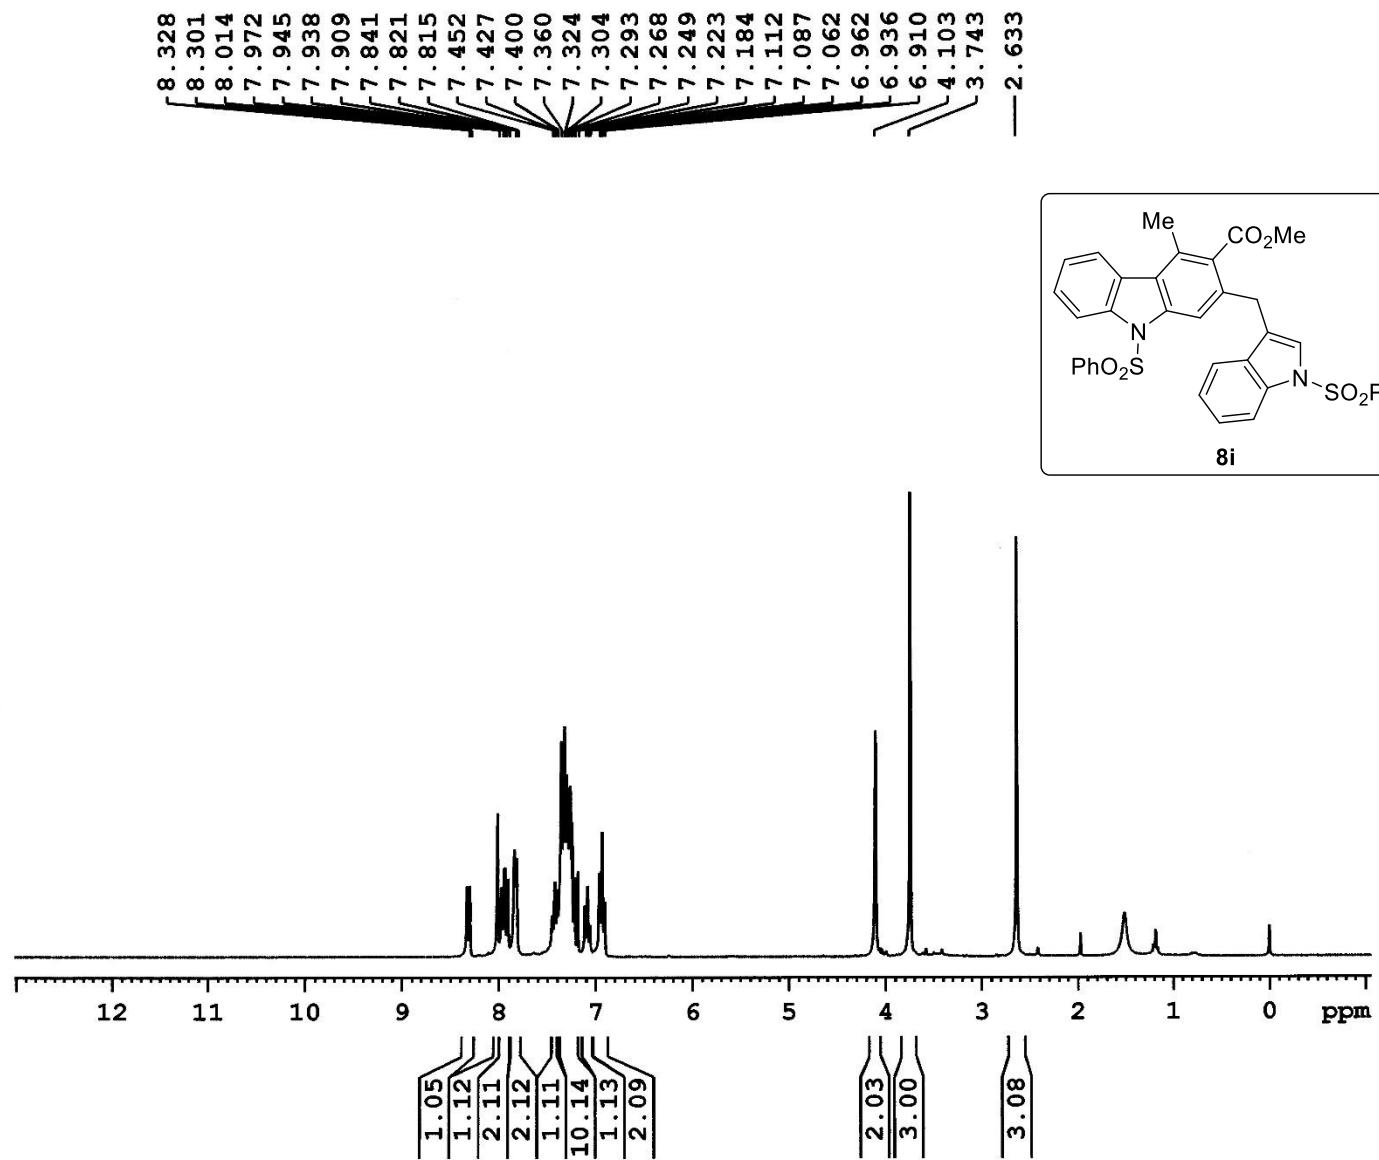

<sup>1</sup>H NMR (300 MHz, CDCl<sub>3</sub>) spectrum of compound **8i**

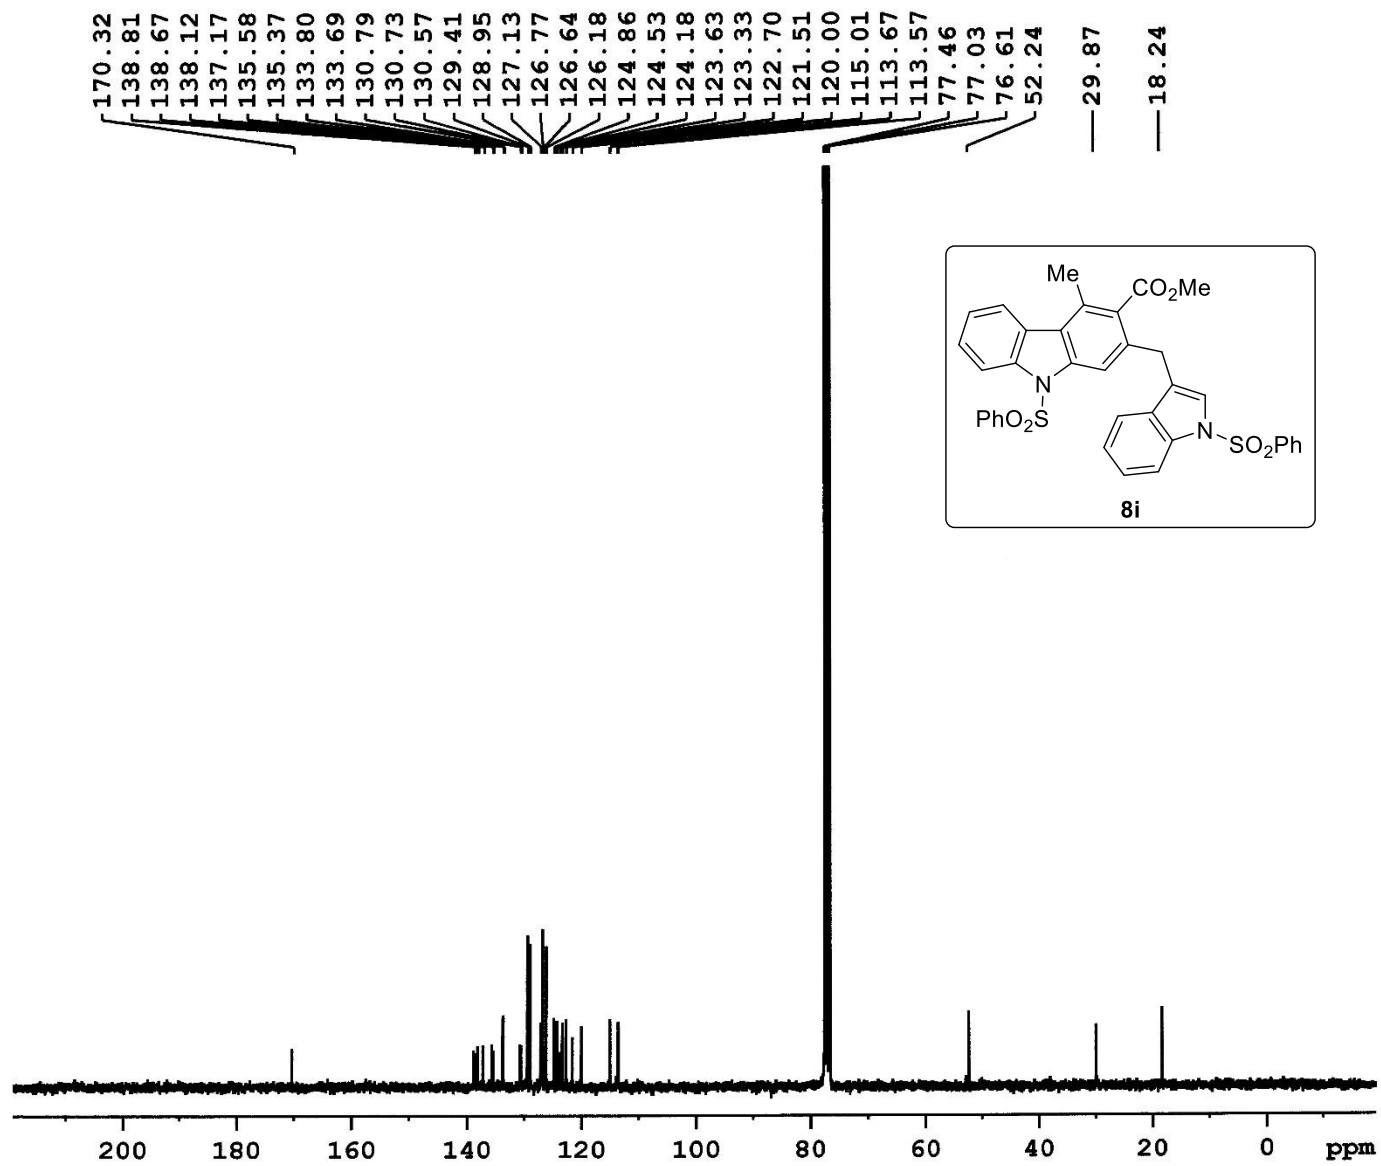

<sup>13</sup>C {<sup>1</sup>H} NMR (CDCl<sub>3</sub>, 75 MHz) spectrum of compound **8i**

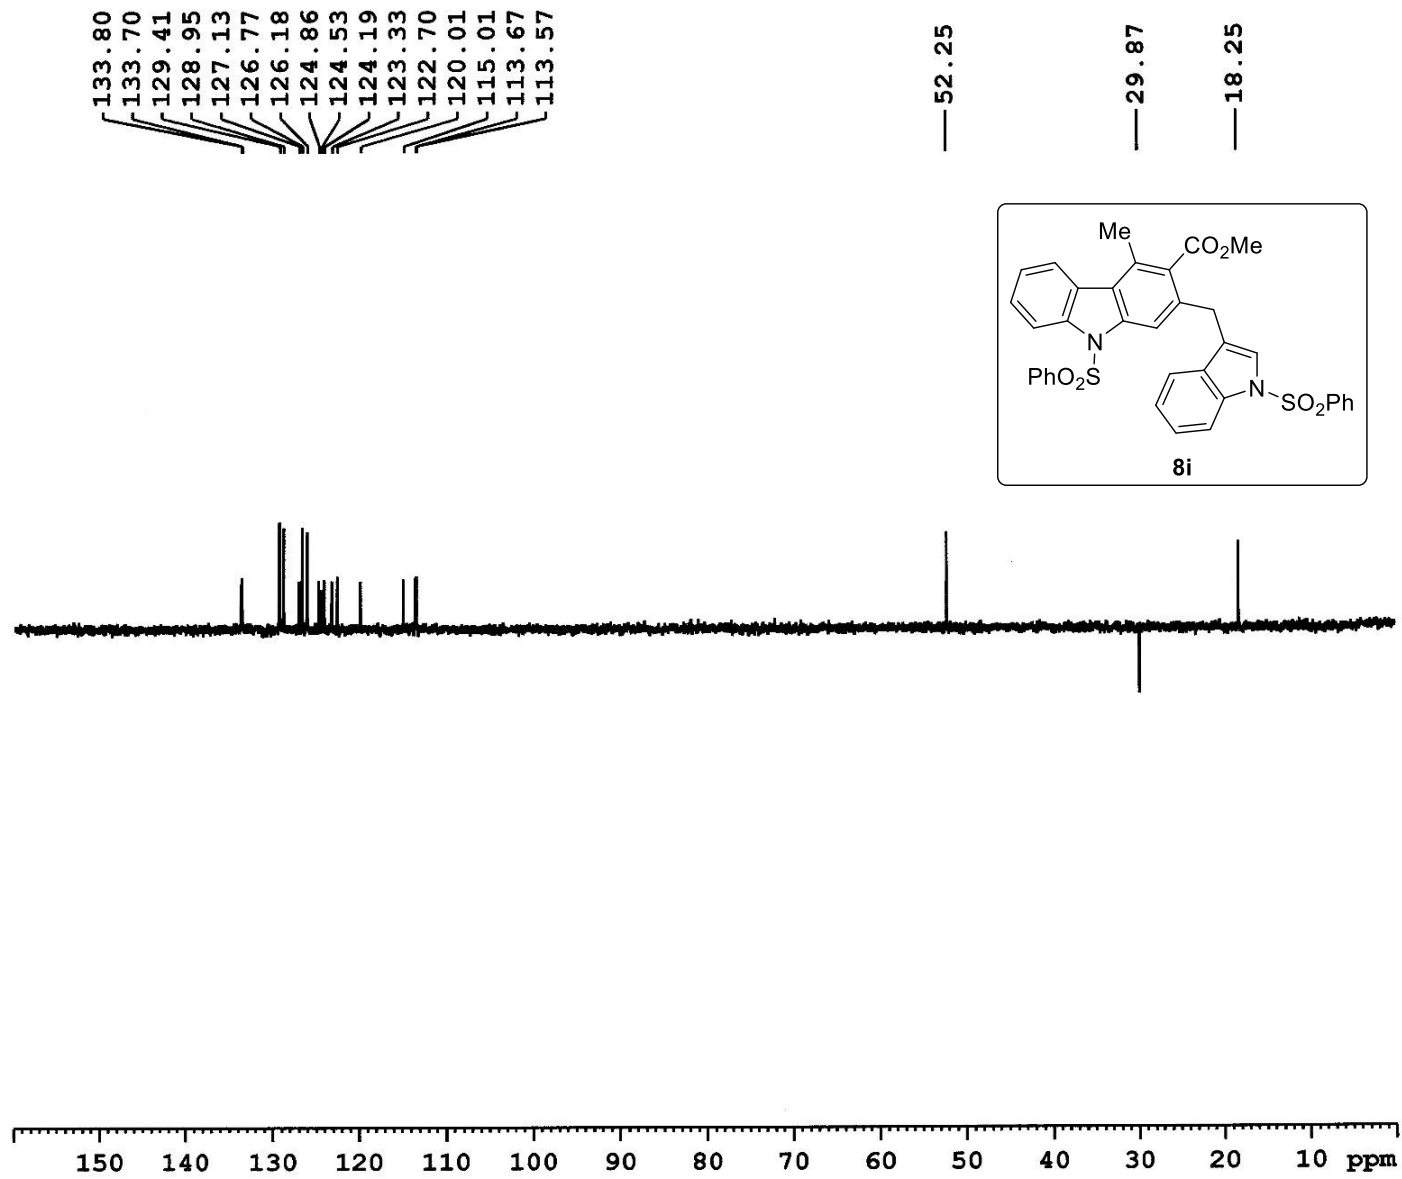

DEPT-135 NMR (75 MHz, CDCl<sub>3</sub>) spectrum of compound **8i**



AG-108

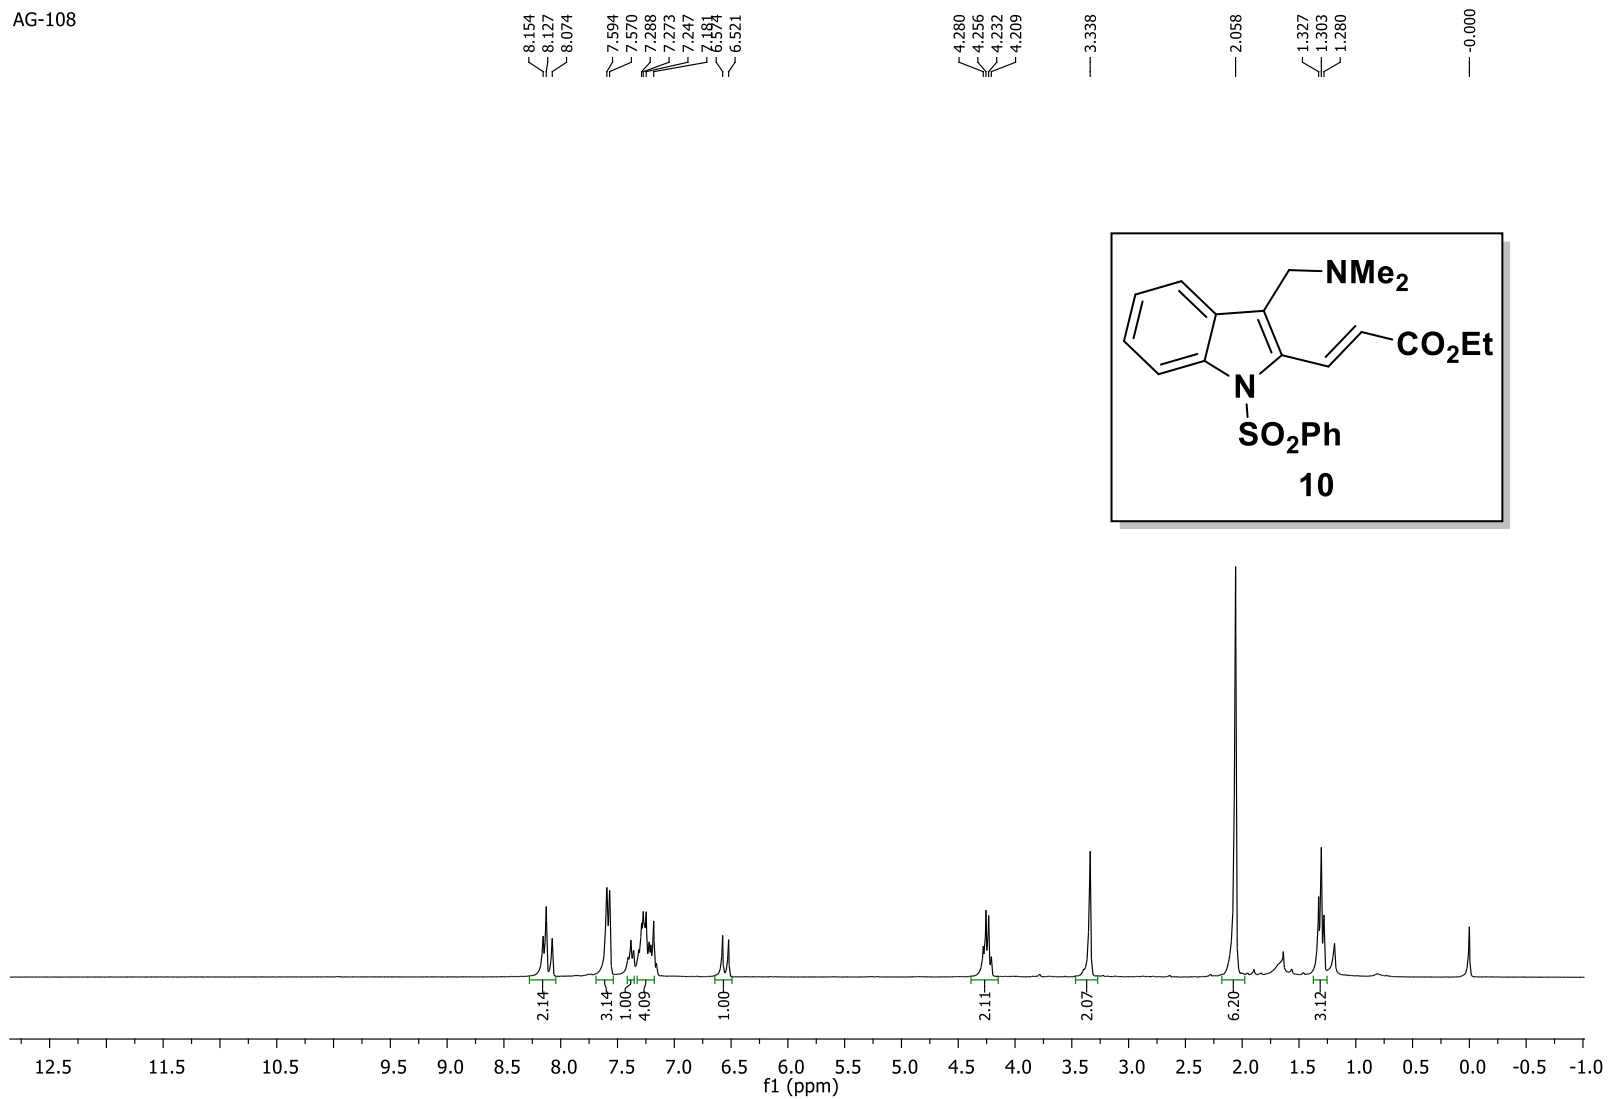

**<sup>1</sup>H NMR (300 MHz, CDCl<sub>3</sub>) spectrum of compound **10****

AG-108

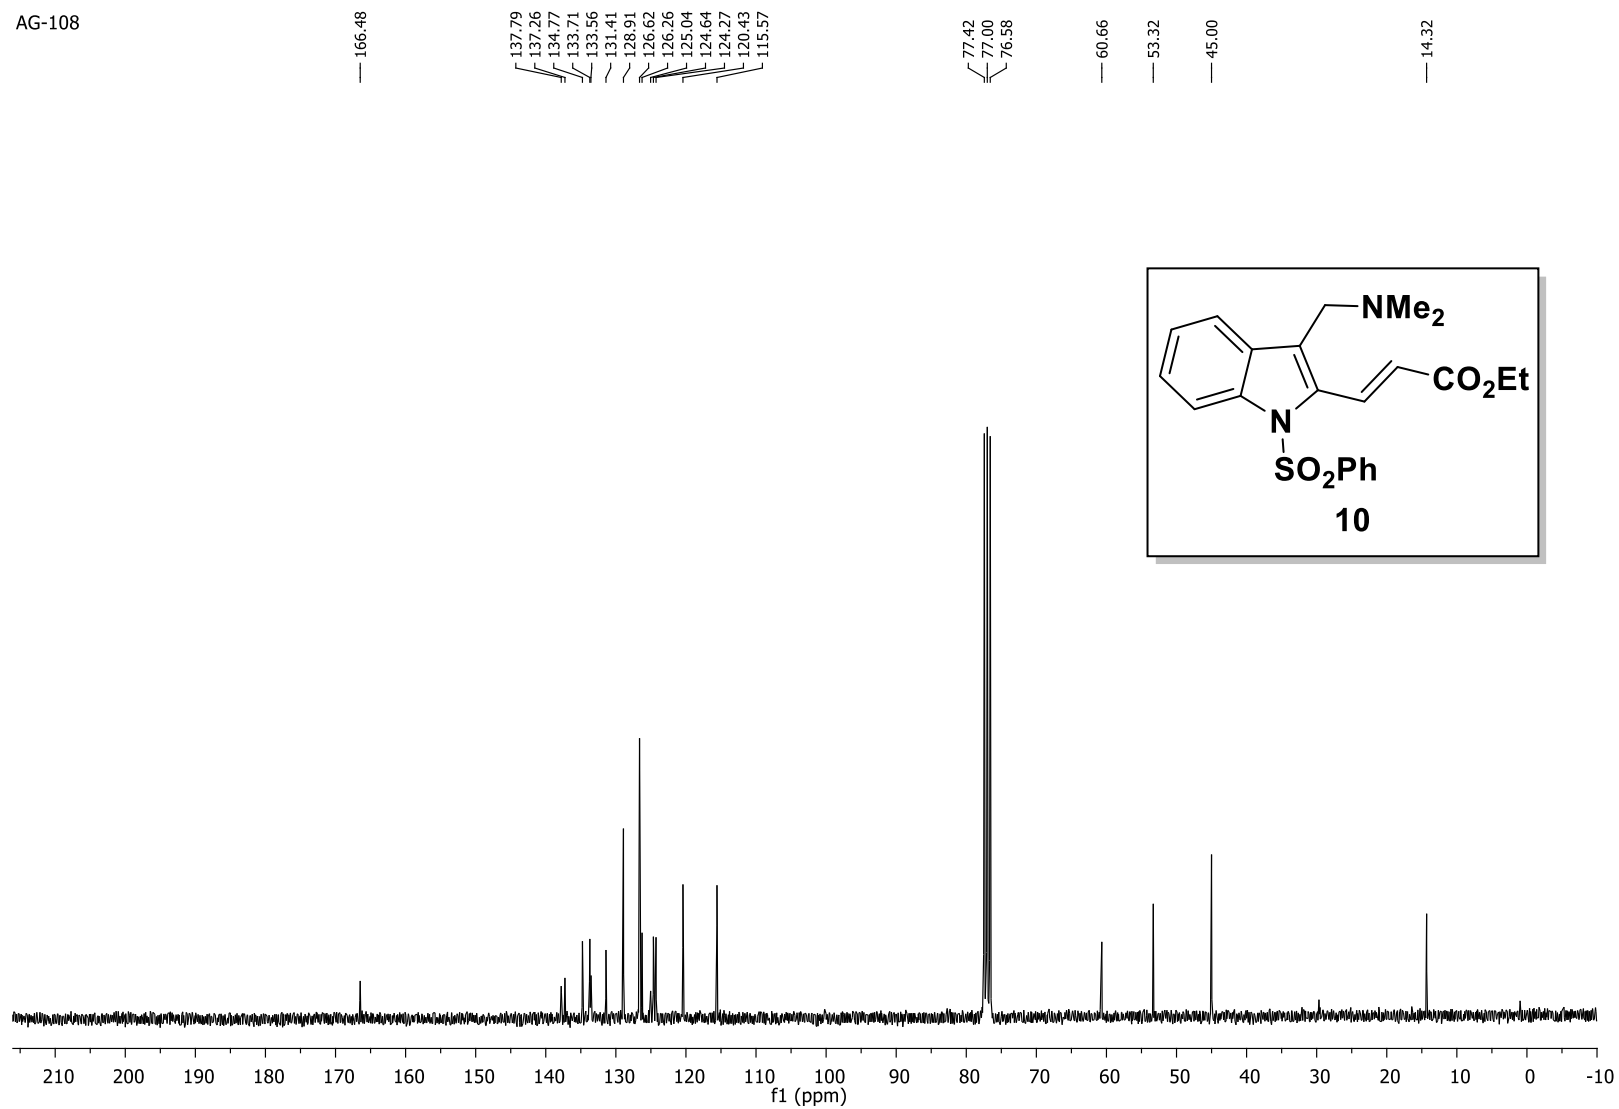

$^{13}\text{C}$  { $^1\text{H}$ } NMR ( $\text{CDCl}_3$ , 75 MHz) spectrum of compound **10**

AG-108

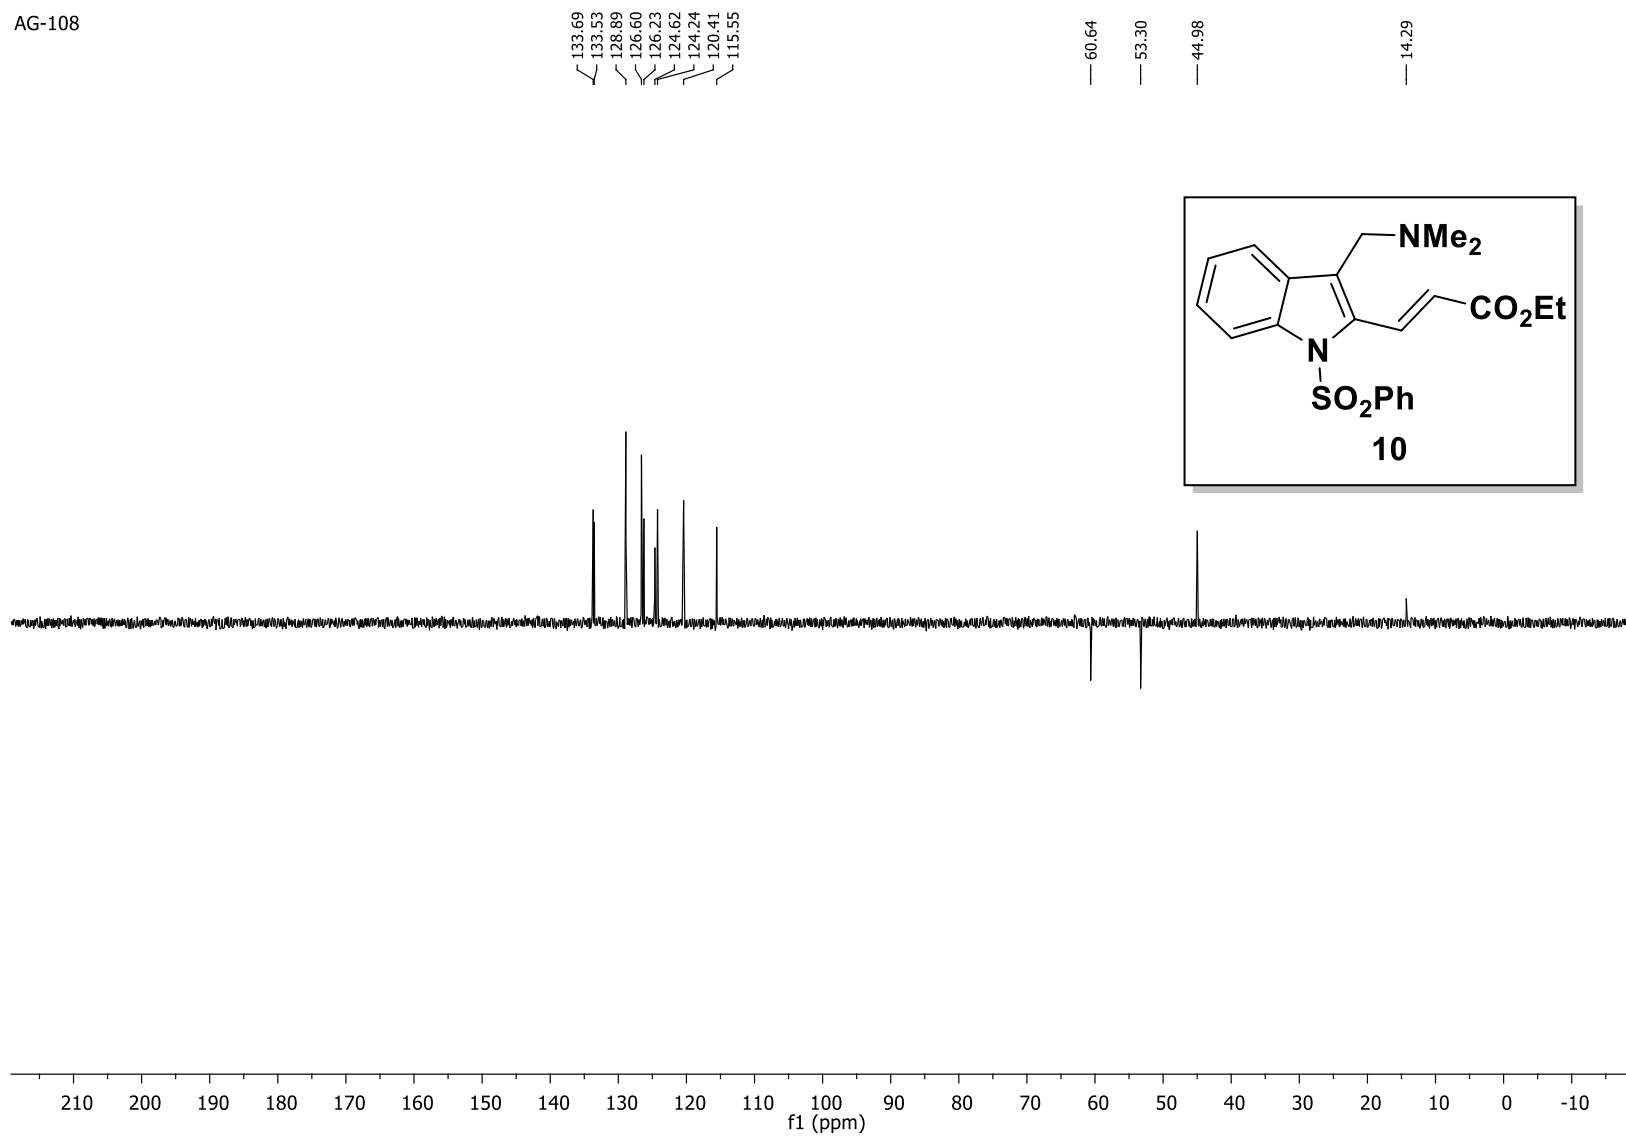

DEPT-135 NMR (75 MHz, CDCl<sub>3</sub>) spectrum of compound **10**

AG-IV-148

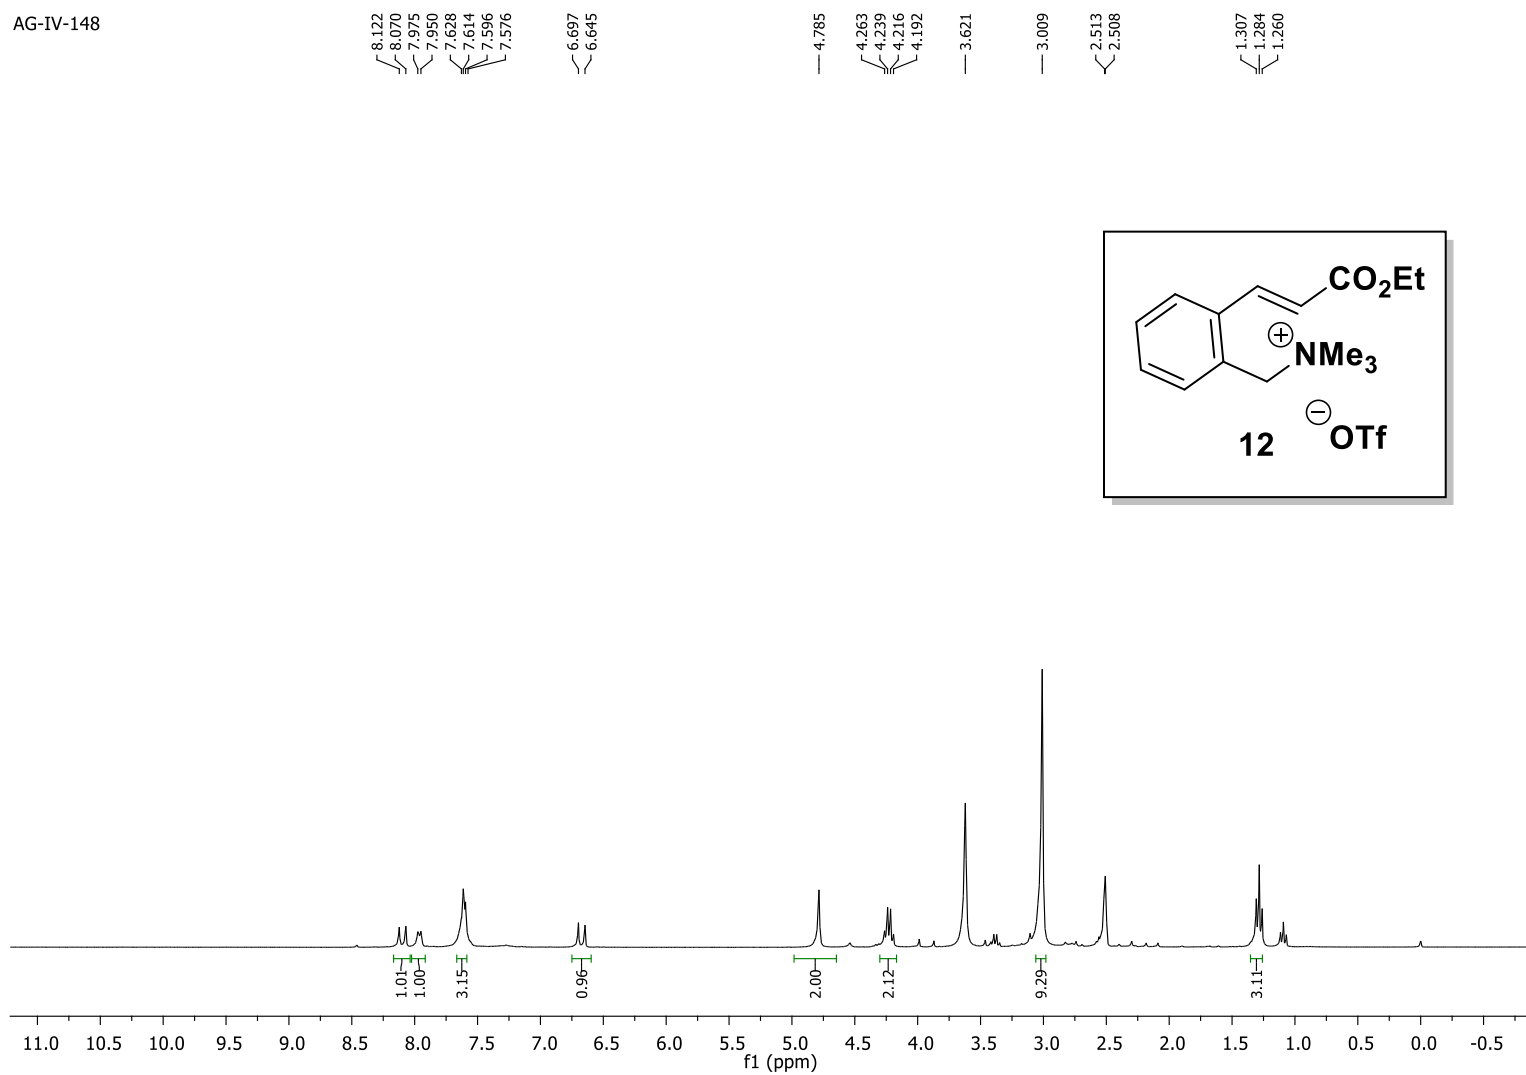

**<sup>1</sup>H NMR (300 MHz, DMSO-*d*<sub>6</sub>) spectrum of compound 12**

AG-IV-148

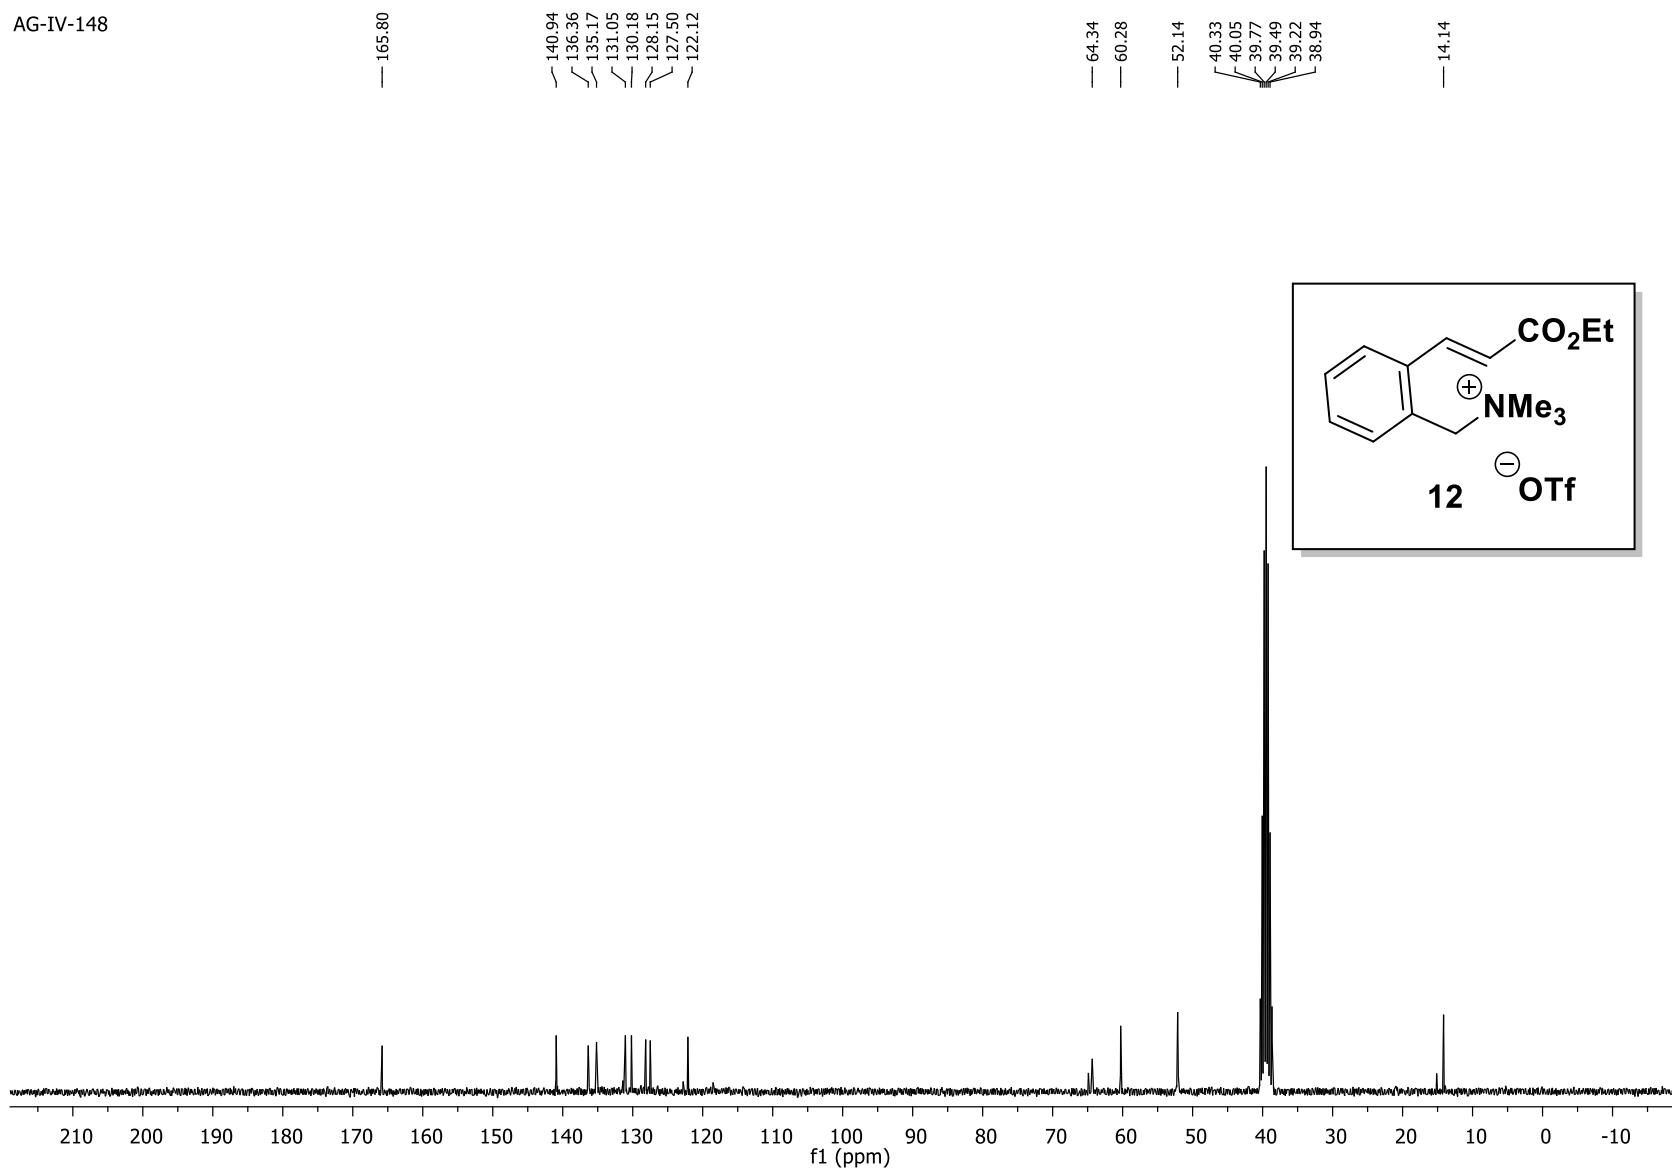

<sup>13</sup>C {<sup>1</sup>H} NMR (75 MHz, DMSO-*d*<sub>6</sub>) spectrum of compound **12**

AG-IV-148

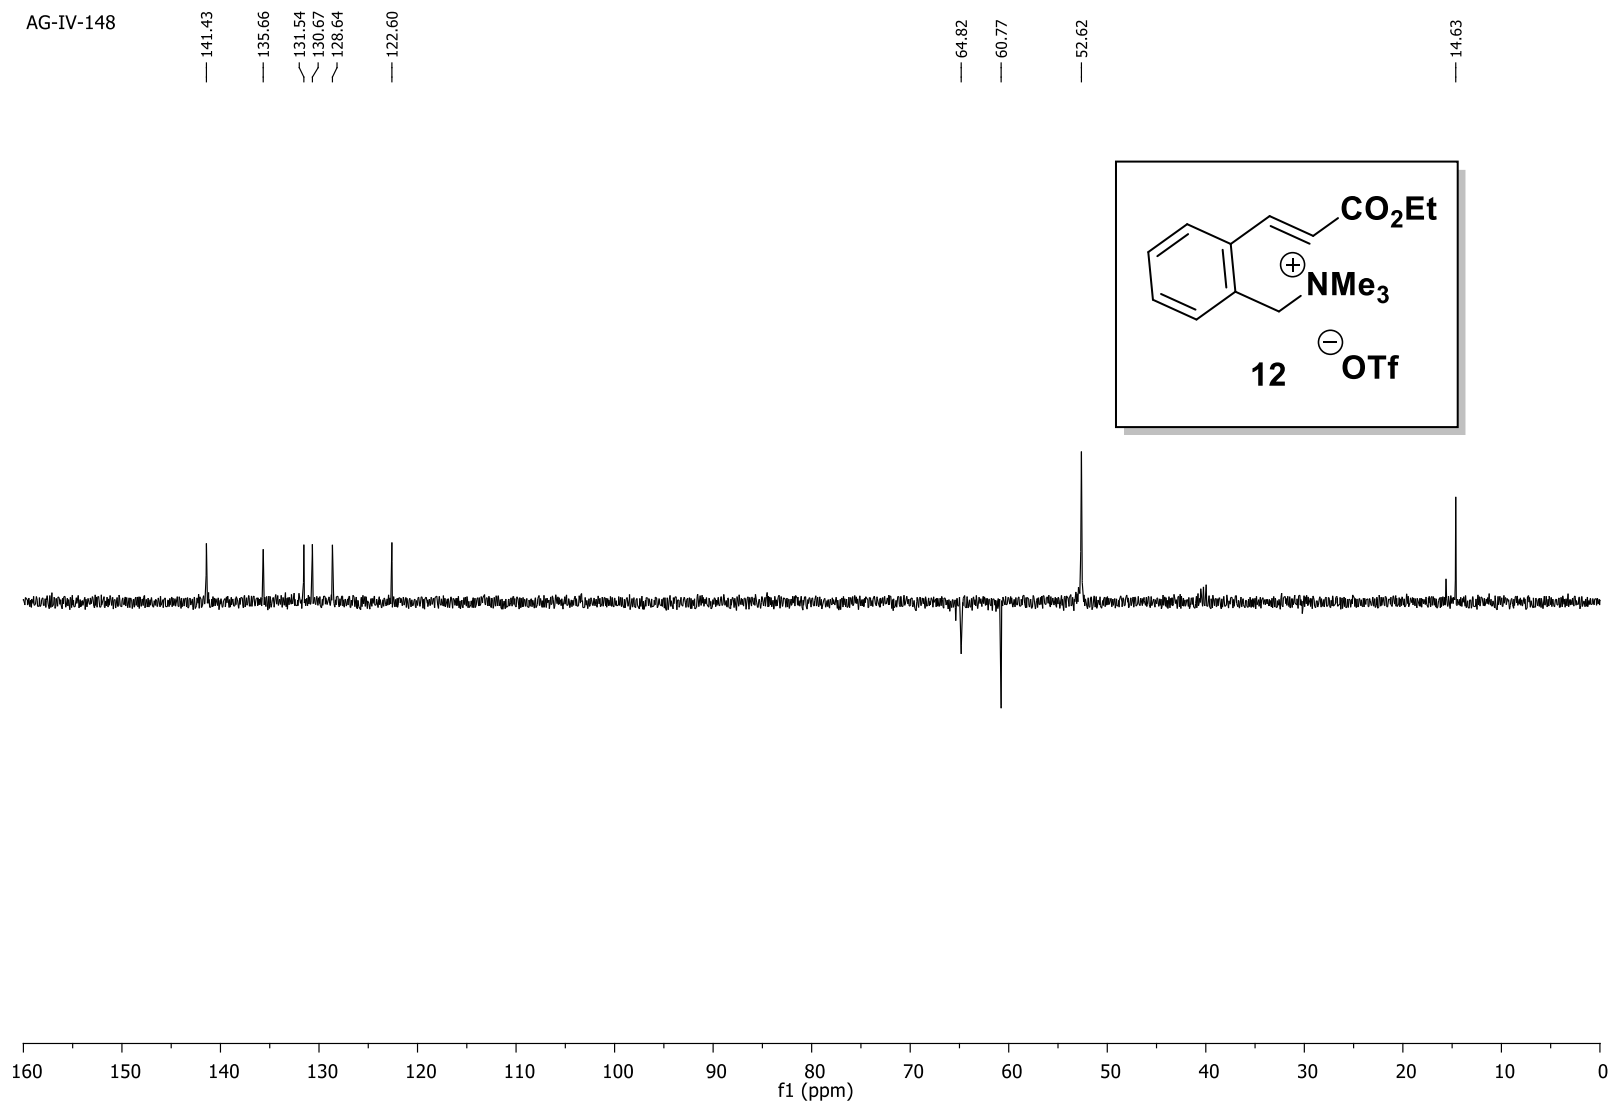

DEPT-135 NMR (75 MHz, DMSO- $d_6$ ) spectrum of compound **12**
